# Supplementary material for: Two NLR immune receptors acquired high-affinity binding to a fungal effector through convergent evolution of their integrated domain
Source: eLife. 2021 Jul 21;10:e66961. doi: 10.7554/eLife.66961 (PMC8294853; doi:10.7554/eLife.66961)
Supplement: Figure 6—figure supplement 3—source data 1. [file elife-66961-fig6-figsupp3-data1.xlsx]

## Sheet: ancHMA-AMEGNND
setup	condition	leaf	score	replicate
A	Pikp-1+Pikp-2+AVR-PikD	1	3	161116		Replicate: each replicate has a unique 6 digit identifier
A	Pikp-1:ancHMA+Pikp-2+AVR-PikD	1	3	161116		ev: empty vector
A	Pikp-1:ancHMA+Pikp-2+AVRblb2	1	3.5	161116
A	Pikp-1:ancHMA+ev+AVRblb2	1	0	161116
A	Pikp-1+Pikp-2+AVRblb2	1	0	161116
A	Pikp-1:ancHMA_AMEGNND+Pikp-2+AVR-PikD	1	0	161116
A	Pikp-1:ancHMA_AMEGNND+Pikp-2+AVRblb2	1	0	161116
A	Pikp-1:ancHMA_AMEGNND+ev+AVRblb2	1	0	161116
A	Pikp-1+Pikp-2+AVR-PikD	2	2	161116
A	Pikp-1:ancHMA+Pikp-2+AVR-PikD	2	2	161116
A	Pikp-1:ancHMA+Pikp-2+AVRblb2	2	3	161116
A	Pikp-1:ancHMA+ev+AVRblb2	2	0	161116
A	Pikp-1+Pikp-2+AVRblb2	2	0	161116
A	Pikp-1:ancHMA_AMEGNND+Pikp-2+AVR-PikD	2	0	161116
A	Pikp-1:ancHMA_AMEGNND+Pikp-2+AVRblb2	2	0	161116
A	Pikp-1:ancHMA_AMEGNND+ev+AVRblb2	2	0	161116
A	Pikp-1+Pikp-2+AVR-PikD	3	2	161116
A	Pikp-1:ancHMA+Pikp-2+AVR-PikD	3	2	161116
A	Pikp-1:ancHMA+Pikp-2+AVRblb2	3	4	161116
A	Pikp-1:ancHMA+ev+AVRblb2	3	0	161116
A	Pikp-1+Pikp-2+AVRblb2	3	0	161116
A	Pikp-1:ancHMA_AMEGNND+Pikp-2+AVR-PikD	3	0	161116
A	Pikp-1:ancHMA_AMEGNND+Pikp-2+AVRblb2	3	0.5	161116
A	Pikp-1:ancHMA_AMEGNND+ev+AVRblb2	3	0	161116
A	Pikp-1+Pikp-2+AVR-PikD	4	2	161116
A	Pikp-1:ancHMA+Pikp-2+AVR-PikD	4	2	161116
A	Pikp-1:ancHMA+Pikp-2+AVRblb2	4	3	161116
A	Pikp-1:ancHMA+ev+AVRblb2	4	0	161116
A	Pikp-1+Pikp-2+AVRblb2	4	0	161116
A	Pikp-1:ancHMA_AMEGNND+Pikp-2+AVR-PikD	4	0	161116
A	Pikp-1:ancHMA_AMEGNND+Pikp-2+AVRblb2	4	0.5	161116
A	Pikp-1:ancHMA_AMEGNND+ev+AVRblb2	4	0	161116
A	Pikp-1+Pikp-2+AVR-PikD	5	3	161116
A	Pikp-1:ancHMA+Pikp-2+AVR-PikD	5	3	161116
A	Pikp-1:ancHMA+Pikp-2+AVRblb2	5	3.5	161116
A	Pikp-1:ancHMA+ev+AVRblb2	5	0.5	161116
A	Pikp-1+Pikp-2+AVRblb2	5	0	161116
A	Pikp-1:ancHMA_AMEGNND+Pikp-2+AVR-PikD	5	0	161116
A	Pikp-1:ancHMA_AMEGNND+Pikp-2+AVRblb2	5	0.5	161116
A	Pikp-1:ancHMA_AMEGNND+ev+AVRblb2	5	0	161116
A	Pikp-1+Pikp-2+AVR-PikD	6	2	161116
A	Pikp-1:ancHMA+Pikp-2+AVR-PikD	6	2	161116
A	Pikp-1:ancHMA+Pikp-2+AVRblb2	6	2.5	161116
A	Pikp-1:ancHMA+ev+AVRblb2	6	0	161116
A	Pikp-1+Pikp-2+AVRblb2	6	0	161116
A	Pikp-1:ancHMA_AMEGNND+Pikp-2+AVR-PikD	6	0	161116
A	Pikp-1:ancHMA_AMEGNND+Pikp-2+AVRblb2	6	0	161116
A	Pikp-1:ancHMA_AMEGNND+ev+AVRblb2	6	0	161116
A	Pikp-1+Pikp-2+AVR-PikD	7	2	161116
A	Pikp-1:ancHMA+Pikp-2+AVR-PikD	7	2	161116
A	Pikp-1:ancHMA+Pikp-2+AVRblb2	7	3	161116
A	Pikp-1:ancHMA+ev+AVRblb2	7	0.5	161116
A	Pikp-1+Pikp-2+AVRblb2	7	0	161116
A	Pikp-1:ancHMA_AMEGNND+Pikp-2+AVR-PikD	7	0	161116
A	Pikp-1:ancHMA_AMEGNND+Pikp-2+AVRblb2	7	0	161116
A	Pikp-1:ancHMA_AMEGNND+ev+AVRblb2	7	0	161116
A	Pikp-1+Pikp-2+AVR-PikD	8	2	161116
A	Pikp-1:ancHMA+Pikp-2+AVR-PikD	8	2	161116
A	Pikp-1:ancHMA+Pikp-2+AVRblb2	8	3.5	161116
A	Pikp-1:ancHMA+ev+AVRblb2	8	0	161116
A	Pikp-1+Pikp-2+AVRblb2	8	0	161116
A	Pikp-1:ancHMA_AMEGNND+Pikp-2+AVR-PikD	8	0	161116
A	Pikp-1:ancHMA_AMEGNND+Pikp-2+AVRblb2	8	0	161116
A	Pikp-1:ancHMA_AMEGNND+ev+AVRblb2	8	0	161116
A	Pikp-1+Pikp-2+AVR-PikD	9	2	161116
A	Pikp-1:ancHMA+Pikp-2+AVR-PikD	9	2	161116
A	Pikp-1:ancHMA+Pikp-2+AVRblb2	9	3	161116
A	Pikp-1:ancHMA+ev+AVRblb2	9	0	161116
A	Pikp-1+Pikp-2+AVRblb2	9	0	161116
A	Pikp-1:ancHMA_AMEGNND+Pikp-2+AVR-PikD	9	0	161116
A	Pikp-1:ancHMA_AMEGNND+Pikp-2+AVRblb2	9	0	161116
A	Pikp-1:ancHMA_AMEGNND+ev+AVRblb2	9	0	161116
A	Pikp-1+Pikp-2+AVR-PikD	10	2	161116
A	Pikp-1:ancHMA+Pikp-2+AVR-PikD	10	2	161116
A	Pikp-1:ancHMA+Pikp-2+AVRblb2	10	3	161116
A	Pikp-1:ancHMA+ev+AVRblb2	10	0	161116
A	Pikp-1+Pikp-2+AVRblb2	10	0	161116
A	Pikp-1:ancHMA_AMEGNND+Pikp-2+AVR-PikD	10	0	161116
A	Pikp-1:ancHMA_AMEGNND+Pikp-2+AVRblb2	10	0	161116
A	Pikp-1:ancHMA_AMEGNND+ev+AVRblb2	10	0	161116
A	Pikp-1+Pikp-2+AVR-PikD	11	2	161116
A	Pikp-1:ancHMA+Pikp-2+AVR-PikD	11	1.5	161116
A	Pikp-1:ancHMA+Pikp-2+AVRblb2	11	3	161116
A	Pikp-1:ancHMA+ev+AVRblb2	11	0	161116
A	Pikp-1+Pikp-2+AVRblb2	11	0	161116
A	Pikp-1:ancHMA_AMEGNND+Pikp-2+AVR-PikD	11	0	161116
A	Pikp-1:ancHMA_AMEGNND+Pikp-2+AVRblb2	11	0	161116
A	Pikp-1:ancHMA_AMEGNND+ev+AVRblb2	11	0	161116
A	Pikp-1+Pikp-2+AVR-PikD	12	2	161116
A	Pikp-1:ancHMA+Pikp-2+AVR-PikD	12	2	161116
A	Pikp-1:ancHMA+Pikp-2+AVRblb2	12	3	161116
A	Pikp-1:ancHMA+ev+AVRblb2	12	0	161116
A	Pikp-1+Pikp-2+AVRblb2	12	0	161116
A	Pikp-1:ancHMA_AMEGNND+Pikp-2+AVR-PikD	12	0	161116
A	Pikp-1:ancHMA_AMEGNND+Pikp-2+AVRblb2	12	0	161116
A	Pikp-1:ancHMA_AMEGNND+ev+AVRblb2	12	0	161116
A	Pikp-1+Pikp-2+AVR-PikD	13	2	161116
A	Pikp-1:ancHMA+Pikp-2+AVR-PikD	13	2	161116
A	Pikp-1:ancHMA+Pikp-2+AVRblb2	13	3.5	161116
A	Pikp-1:ancHMA+ev+AVRblb2	13	0	161116
A	Pikp-1+Pikp-2+AVRblb2	13	0	161116
A	Pikp-1:ancHMA_AMEGNND+Pikp-2+AVR-PikD	13	0.5	161116
A	Pikp-1:ancHMA_AMEGNND+Pikp-2+AVRblb2	13	0.5	161116
A	Pikp-1:ancHMA_AMEGNND+ev+AVRblb2	13	0	161116
A	Pikp-1+Pikp-2+AVR-PikD	14	1	161116
A	Pikp-1:ancHMA+Pikp-2+AVR-PikD	14	1	161116
A	Pikp-1:ancHMA+Pikp-2+AVRblb2	14	3	161116
A	Pikp-1:ancHMA+ev+AVRblb2	14	0	161116
A	Pikp-1+Pikp-2+AVRblb2	14	0	161116
A	Pikp-1:ancHMA_AMEGNND+Pikp-2+AVR-PikD	14	0	161116
A	Pikp-1:ancHMA_AMEGNND+Pikp-2+AVRblb2	14	0	161116
A	Pikp-1:ancHMA_AMEGNND+ev+AVRblb2	14	0	161116
A	Pikp-1+Pikp-2+AVR-PikD	15	2	161116
A	Pikp-1:ancHMA+Pikp-2+AVR-PikD	15	2	161116
A	Pikp-1:ancHMA+Pikp-2+AVRblb2	15	5	161116
A	Pikp-1:ancHMA+ev+AVRblb2	15	0	161116
A	Pikp-1+Pikp-2+AVRblb2	15	0	161116
A	Pikp-1:ancHMA_AMEGNND+Pikp-2+AVR-PikD	15	0.5	161116
A	Pikp-1:ancHMA_AMEGNND+Pikp-2+AVRblb2	15	0.5	161116
A	Pikp-1:ancHMA_AMEGNND+ev+AVRblb2	15	0	161116
A	Pikp-1+Pikp-2+AVR-PikD	16	3	161116
A	Pikp-1:ancHMA+Pikp-2+AVR-PikD	16	2	161116
A	Pikp-1:ancHMA+Pikp-2+AVRblb2	16	3	161116
A	Pikp-1:ancHMA+ev+AVRblb2	16	0	161116
A	Pikp-1+Pikp-2+AVRblb2	16	0	161116
A	Pikp-1:ancHMA_AMEGNND+Pikp-2+AVR-PikD	16	0.5	161116
A	Pikp-1:ancHMA_AMEGNND+Pikp-2+AVRblb2	16	2	161116
A	Pikp-1:ancHMA_AMEGNND+ev+AVRblb2	16	0	161116
A	Pikp-1+Pikp-2+AVR-PikD	17	2	161116
A	Pikp-1:ancHMA+Pikp-2+AVR-PikD	17	2	161116
A	Pikp-1:ancHMA+Pikp-2+AVRblb2	17	3.5	161116
A	Pikp-1:ancHMA+ev+AVRblb2	17	0	161116
A	Pikp-1+Pikp-2+AVRblb2	17	0	161116
A	Pikp-1:ancHMA_AMEGNND+Pikp-2+AVR-PikD	17	0	161116
A	Pikp-1:ancHMA_AMEGNND+Pikp-2+AVRblb2	17	0	161116
A	Pikp-1:ancHMA_AMEGNND+ev+AVRblb2	17	0	161116
A	Pikp-1+Pikp-2+AVR-PikD	18	1	161116
A	Pikp-1:ancHMA+Pikp-2+AVR-PikD	18	1	161116
A	Pikp-1:ancHMA+Pikp-2+AVRblb2	18	2	161116
A	Pikp-1:ancHMA+ev+AVRblb2	18	0	161116
A	Pikp-1+Pikp-2+AVRblb2	18	0	161116
A	Pikp-1:ancHMA_AMEGNND+Pikp-2+AVR-PikD	18	0	161116
A	Pikp-1:ancHMA_AMEGNND+Pikp-2+AVRblb2	18	0	161116
A	Pikp-1:ancHMA_AMEGNND+ev+AVRblb2	18	0	161116
A	Pikp-1+Pikp-2+AVR-PikD	19	3	161116
A	Pikp-1:ancHMA+Pikp-2+AVR-PikD	19	3	161116
A	Pikp-1:ancHMA+Pikp-2+AVRblb2	19	3.5	161116
A	Pikp-1:ancHMA+ev+AVRblb2	19	0	161116
A	Pikp-1+Pikp-2+AVRblb2	19	0	161116
A	Pikp-1:ancHMA_AMEGNND+Pikp-2+AVR-PikD	19	0	161116
A	Pikp-1:ancHMA_AMEGNND+Pikp-2+AVRblb2	19	0	161116
A	Pikp-1:ancHMA_AMEGNND+ev+AVRblb2	19	0	161116
A	Pikp-1+Pikp-2+AVR-PikD	20	1	161116
A	Pikp-1:ancHMA+Pikp-2+AVR-PikD	20	1	161116
A	Pikp-1:ancHMA+Pikp-2+AVRblb2	20	3	161116
A	Pikp-1:ancHMA+ev+AVRblb2	20	0.5	161116
A	Pikp-1+Pikp-2+AVRblb2	20	0	161116
A	Pikp-1:ancHMA_AMEGNND+Pikp-2+AVR-PikD	20	0	161116
A	Pikp-1:ancHMA_AMEGNND+Pikp-2+AVRblb2	20	0.5	161116
A	Pikp-1:ancHMA_AMEGNND+ev+AVRblb2	20	0	161116
A	Pikp-1+Pikp-2+AVR-PikD	21	2	161116
A	Pikp-1:ancHMA+Pikp-2+AVR-PikD	21	2	161116
A	Pikp-1:ancHMA+Pikp-2+AVRblb2	21	3	161116
A	Pikp-1:ancHMA+ev+AVRblb2	21	0	161116
A	Pikp-1+Pikp-2+AVRblb2	21	0	161116
A	Pikp-1:ancHMA_AMEGNND+Pikp-2+AVR-PikD	21	0	161116
A	Pikp-1:ancHMA_AMEGNND+Pikp-2+AVRblb2	21	0	161116
A	Pikp-1:ancHMA_AMEGNND+ev+AVRblb2	21	0	161116
A	Pikp-1+Pikp-2+AVR-PikD	22	2	161116
A	Pikp-1:ancHMA+Pikp-2+AVR-PikD	22	2	161116
A	Pikp-1:ancHMA+Pikp-2+AVRblb2	22	3.5	161116
A	Pikp-1:ancHMA+ev+AVRblb2	22	0	161116
A	Pikp-1+Pikp-2+AVRblb2	22	0	161116
A	Pikp-1:ancHMA_AMEGNND+Pikp-2+AVR-PikD	22	0	161116
A	Pikp-1:ancHMA_AMEGNND+Pikp-2+AVRblb2	22	0	161116
A	Pikp-1:ancHMA_AMEGNND+ev+AVRblb2	22	0	161116
A	Pikp-1+Pikp-2+AVR-PikD	23	3	161116
A	Pikp-1:ancHMA+Pikp-2+AVR-PikD	23	3	161116
A	Pikp-1:ancHMA+Pikp-2+AVRblb2	23	3.5	161116
A	Pikp-1:ancHMA+ev+AVRblb2	23	0	161116
A	Pikp-1+Pikp-2+AVRblb2	23	0	161116
A	Pikp-1:ancHMA_AMEGNND+Pikp-2+AVR-PikD	23	0	161116
A	Pikp-1:ancHMA_AMEGNND+Pikp-2+AVRblb2	23	0.5	161116
A	Pikp-1:ancHMA_AMEGNND+ev+AVRblb2	23	0	161116
A	Pikp-1+Pikp-2+AVR-PikD	24	1	161116
A	Pikp-1:ancHMA+Pikp-2+AVR-PikD	24	1	161116
A	Pikp-1:ancHMA+Pikp-2+AVRblb2	24	2	161116
A	Pikp-1:ancHMA+ev+AVRblb2	24	0	161116
A	Pikp-1+Pikp-2+AVRblb2	24	0	161116
A	Pikp-1:ancHMA_AMEGNND+Pikp-2+AVR-PikD	24	0	161116
A	Pikp-1:ancHMA_AMEGNND+Pikp-2+AVRblb2	24	0	161116
A	Pikp-1:ancHMA_AMEGNND+ev+AVRblb2	24	0	161116
A	Pikp-1+Pikp-2+AVR-PikD	25	1	161116
A	Pikp-1:ancHMA+Pikp-2+AVR-PikD	25	1	161116
A	Pikp-1:ancHMA+Pikp-2+AVRblb2	25	3	161116
A	Pikp-1:ancHMA+ev+AVRblb2	25	0	161116
A	Pikp-1+Pikp-2+AVRblb2	25	0	161116
A	Pikp-1:ancHMA_AMEGNND+Pikp-2+AVR-PikD	25	0	161116
A	Pikp-1:ancHMA_AMEGNND+Pikp-2+AVRblb2	25	0	161116
A	Pikp-1:ancHMA_AMEGNND+ev+AVRblb2	25	0	161116
A	Pikp-1+Pikp-2+AVR-PikD	26	3	161116
A	Pikp-1:ancHMA+Pikp-2+AVR-PikD	26	2	161116
A	Pikp-1:ancHMA+Pikp-2+AVRblb2	26	3	161116
A	Pikp-1:ancHMA+ev+AVRblb2	26	0	161116
A	Pikp-1+Pikp-2+AVRblb2	26	0	161116
A	Pikp-1:ancHMA_AMEGNND+Pikp-2+AVR-PikD	26	0	161116
A	Pikp-1:ancHMA_AMEGNND+Pikp-2+AVRblb2	26	0	161116
A	Pikp-1:ancHMA_AMEGNND+ev+AVRblb2	26	0	161116
A	Pikp-1+Pikp-2+AVR-PikD	1	2	170202
A	Pikp-1:ancHMA+Pikp-2+AVR-PikD	1	2	170202
A	Pikp-1:ancHMA+Pikp-2+AVRblb2	1	3	170202
A	Pikp-1:ancHMA+ev+AVRblb2	1	0	170202
A	Pikp-1+Pikp-2+AVRblb2	1	0	170202
A	Pikp-1:ancHMA_AMEGNND+Pikp-2+AVR-PikD	1	0	170202
A	Pikp-1:ancHMA_AMEGNND+Pikp-2+AVRblb2	1	0	170202
A	Pikp-1:ancHMA_AMEGNND+ev+AVRblb2	1	0	170202
A	Pikp-1+Pikp-2+AVR-PikD	2	2	170202
A	Pikp-1:ancHMA+Pikp-2+AVR-PikD	2	3	170202
A	Pikp-1:ancHMA+Pikp-2+AVRblb2	2	3	170202
A	Pikp-1:ancHMA+ev+AVRblb2	2	0	170202
A	Pikp-1+Pikp-2+AVRblb2	2	0	170202
A	Pikp-1:ancHMA_AMEGNND+Pikp-2+AVR-PikD	2	0	170202
A	Pikp-1:ancHMA_AMEGNND+Pikp-2+AVRblb2	2	0	170202
A	Pikp-1:ancHMA_AMEGNND+ev+AVRblb2	2	0	170202
A	Pikp-1+Pikp-2+AVR-PikD	3	2	170202
A	Pikp-1:ancHMA+Pikp-2+AVR-PikD	3	3	170202
A	Pikp-1:ancHMA+Pikp-2+AVRblb2	3	3.5	170202
A	Pikp-1:ancHMA+ev+AVRblb2	3	0	170202
A	Pikp-1+Pikp-2+AVRblb2	3	0	170202
A	Pikp-1:ancHMA_AMEGNND+Pikp-2+AVR-PikD	3	0	170202
A	Pikp-1:ancHMA_AMEGNND+Pikp-2+AVRblb2	3	0	170202
A	Pikp-1:ancHMA_AMEGNND+ev+AVRblb2	3	0	170202
A	Pikp-1+Pikp-2+AVR-PikD	4	2	170202
A	Pikp-1:ancHMA+Pikp-2+AVR-PikD	4	3	170202
A	Pikp-1:ancHMA+Pikp-2+AVRblb2	4	4	170202
A	Pikp-1:ancHMA+ev+AVRblb2	4	0	170202
A	Pikp-1+Pikp-2+AVRblb2	4	0	170202
A	Pikp-1:ancHMA_AMEGNND+Pikp-2+AVR-PikD	4	0	170202
A	Pikp-1:ancHMA_AMEGNND+Pikp-2+AVRblb2	4	0.5	170202
A	Pikp-1:ancHMA_AMEGNND+ev+AVRblb2	4	0	170202
A	Pikp-1+Pikp-2+AVR-PikD	5	2	170202
A	Pikp-1:ancHMA+Pikp-2+AVR-PikD	5	3	170202
A	Pikp-1:ancHMA+Pikp-2+AVRblb2	5	3	170202
A	Pikp-1:ancHMA+ev+AVRblb2	5	0	170202
A	Pikp-1+Pikp-2+AVRblb2	5	0	170202
A	Pikp-1:ancHMA_AMEGNND+Pikp-2+AVR-PikD	5	0	170202
A	Pikp-1:ancHMA_AMEGNND+Pikp-2+AVRblb2	5	0	170202
A	Pikp-1:ancHMA_AMEGNND+ev+AVRblb2	5	0	170202
A	Pikp-1+Pikp-2+AVR-PikD	6	1	170202
A	Pikp-1:ancHMA+Pikp-2+AVR-PikD	6	2	170202
A	Pikp-1:ancHMA+Pikp-2+AVRblb2	6	2	170202
A	Pikp-1:ancHMA+ev+AVRblb2	6	0	170202
A	Pikp-1+Pikp-2+AVRblb2	6	0	170202
A	Pikp-1:ancHMA_AMEGNND+Pikp-2+AVR-PikD	6	0	170202
A	Pikp-1:ancHMA_AMEGNND+Pikp-2+AVRblb2	6	0	170202
A	Pikp-1:ancHMA_AMEGNND+ev+AVRblb2	6	0	170202
A	Pikp-1+Pikp-2+AVR-PikD	7	3	170202
A	Pikp-1:ancHMA+Pikp-2+AVR-PikD	7	2	170202
A	Pikp-1:ancHMA+Pikp-2+AVRblb2	7	3.5	170202
A	Pikp-1:ancHMA+ev+AVRblb2	7	0	170202
A	Pikp-1+Pikp-2+AVRblb2	7	0	170202
A	Pikp-1:ancHMA_AMEGNND+Pikp-2+AVR-PikD	7	0	170202
A	Pikp-1:ancHMA_AMEGNND+Pikp-2+AVRblb2	7	0	170202
A	Pikp-1:ancHMA_AMEGNND+ev+AVRblb2	7	0	170202
A	Pikp-1+Pikp-2+AVR-PikD	8	2	170202
A	Pikp-1:ancHMA+Pikp-2+AVR-PikD	8	3	170202
A	Pikp-1:ancHMA+Pikp-2+AVRblb2	8	3.5	170202
A	Pikp-1:ancHMA+ev+AVRblb2	8	0	170202
A	Pikp-1+Pikp-2+AVRblb2	8	0	170202
A	Pikp-1:ancHMA_AMEGNND+Pikp-2+AVR-PikD	8	0	170202
A	Pikp-1:ancHMA_AMEGNND+Pikp-2+AVRblb2	8	0.5	170202
A	Pikp-1:ancHMA_AMEGNND+ev+AVRblb2	8	0	170202
A	Pikp-1+Pikp-2+AVR-PikD	9	2	170202
A	Pikp-1:ancHMA+Pikp-2+AVR-PikD	9	2	170202
A	Pikp-1:ancHMA+Pikp-2+AVRblb2	9	3.5	170202
A	Pikp-1:ancHMA+ev+AVRblb2	9	0	170202
A	Pikp-1+Pikp-2+AVRblb2	9	0	170202
A	Pikp-1:ancHMA_AMEGNND+Pikp-2+AVR-PikD	9	0	170202
A	Pikp-1:ancHMA_AMEGNND+Pikp-2+AVRblb2	9	0	170202
A	Pikp-1:ancHMA_AMEGNND+ev+AVRblb2	9	0	170202
A	Pikp-1+Pikp-2+AVR-PikD	10	3	170202
A	Pikp-1:ancHMA+Pikp-2+AVR-PikD	10	3	170202
A	Pikp-1:ancHMA+Pikp-2+AVRblb2	10	3.5	170202
A	Pikp-1:ancHMA+ev+AVRblb2	10	0	170202
A	Pikp-1+Pikp-2+AVRblb2	10	0	170202
A	Pikp-1:ancHMA_AMEGNND+Pikp-2+AVR-PikD	10	0	170202
A	Pikp-1:ancHMA_AMEGNND+Pikp-2+AVRblb2	10	0	170202
A	Pikp-1:ancHMA_AMEGNND+ev+AVRblb2	10	0	170202
A	Pikp-1+Pikp-2+AVR-PikD	11	2	170202
A	Pikp-1:ancHMA+Pikp-2+AVR-PikD	11	2	170202
A	Pikp-1:ancHMA+Pikp-2+AVRblb2	11	2	170202
A	Pikp-1:ancHMA+ev+AVRblb2	11	0	170202
A	Pikp-1+Pikp-2+AVRblb2	11	0	170202
A	Pikp-1:ancHMA_AMEGNND+Pikp-2+AVR-PikD	11	0	170202
A	Pikp-1:ancHMA_AMEGNND+Pikp-2+AVRblb2	11	0	170202
A	Pikp-1:ancHMA_AMEGNND+ev+AVRblb2	11	0	170202
A	Pikp-1+Pikp-2+AVR-PikD	12	2	170202
A	Pikp-1:ancHMA+Pikp-2+AVR-PikD	12	2	170202
A	Pikp-1:ancHMA+Pikp-2+AVRblb2	12	3	170202
A	Pikp-1:ancHMA+ev+AVRblb2	12	0	170202
A	Pikp-1+Pikp-2+AVRblb2	12	0	170202
A	Pikp-1:ancHMA_AMEGNND+Pikp-2+AVR-PikD	12	0	170202
A	Pikp-1:ancHMA_AMEGNND+Pikp-2+AVRblb2	12	0	170202
A	Pikp-1:ancHMA_AMEGNND+ev+AVRblb2	12	0	170202
A	Pikp-1+Pikp-2+AVR-PikD	13	2	170202
A	Pikp-1:ancHMA+Pikp-2+AVR-PikD	13	3	170202
A	Pikp-1:ancHMA+Pikp-2+AVRblb2	13	3	170202
A	Pikp-1:ancHMA+ev+AVRblb2	13	0	170202
A	Pikp-1+Pikp-2+AVRblb2	13	0	170202
A	Pikp-1:ancHMA_AMEGNND+Pikp-2+AVR-PikD	13	0	170202
A	Pikp-1:ancHMA_AMEGNND+Pikp-2+AVRblb2	13	0	170202
A	Pikp-1:ancHMA_AMEGNND+ev+AVRblb2	13	0	170202
A	Pikp-1+Pikp-2+AVR-PikD	14	2	170202
A	Pikp-1:ancHMA+Pikp-2+AVR-PikD	14	2	170202
A	Pikp-1:ancHMA+Pikp-2+AVRblb2	14	3	170202
A	Pikp-1:ancHMA+ev+AVRblb2	14	0	170202
A	Pikp-1+Pikp-2+AVRblb2	14	0	170202
A	Pikp-1:ancHMA_AMEGNND+Pikp-2+AVR-PikD	14	0	170202
A	Pikp-1:ancHMA_AMEGNND+Pikp-2+AVRblb2	14	0	170202
A	Pikp-1:ancHMA_AMEGNND+ev+AVRblb2	14	0	170202
A	Pikp-1+Pikp-2+AVR-PikD	15	2.5	170202
A	Pikp-1:ancHMA+Pikp-2+AVR-PikD	15	3	170202
A	Pikp-1:ancHMA+Pikp-2+AVRblb2	15	3	170202
A	Pikp-1:ancHMA+ev+AVRblb2	15	0	170202
A	Pikp-1+Pikp-2+AVRblb2	15	0	170202
A	Pikp-1:ancHMA_AMEGNND+Pikp-2+AVR-PikD	15	0	170202
A	Pikp-1:ancHMA_AMEGNND+Pikp-2+AVRblb2	15	0	170202
A	Pikp-1:ancHMA_AMEGNND+ev+AVRblb2	15	0	170202
A	Pikp-1+Pikp-2+AVR-PikD	16	2	170202
A	Pikp-1:ancHMA+Pikp-2+AVR-PikD	16	2	170202
A	Pikp-1:ancHMA+Pikp-2+AVRblb2	16	2	170202
A	Pikp-1:ancHMA+ev+AVRblb2	16	0	170202
A	Pikp-1+Pikp-2+AVRblb2	16	0	170202
A	Pikp-1:ancHMA_AMEGNND+Pikp-2+AVR-PikD	16	0	170202
A	Pikp-1:ancHMA_AMEGNND+Pikp-2+AVRblb2	16	0	170202
A	Pikp-1:ancHMA_AMEGNND+ev+AVRblb2	16	0	170202
A	Pikp-1+Pikp-2+AVR-PikD	17	2	170202
A	Pikp-1:ancHMA+Pikp-2+AVR-PikD	17	2	170202
A	Pikp-1:ancHMA+Pikp-2+AVRblb2	17	3	170202
A	Pikp-1:ancHMA+ev+AVRblb2	17	0	170202
A	Pikp-1+Pikp-2+AVRblb2	17	0	170202
A	Pikp-1:ancHMA_AMEGNND+Pikp-2+AVR-PikD	17	0	170202
A	Pikp-1:ancHMA_AMEGNND+Pikp-2+AVRblb2	17	0	170202
A	Pikp-1:ancHMA_AMEGNND+ev+AVRblb2	17	0	170202
A	Pikp-1+Pikp-2+AVR-PikD	18	2	170202
A	Pikp-1:ancHMA+Pikp-2+AVR-PikD	18	2	170202
A	Pikp-1:ancHMA+Pikp-2+AVRblb2	18	3	170202
A	Pikp-1:ancHMA+ev+AVRblb2	18	0	170202
A	Pikp-1+Pikp-2+AVRblb2	18	0	170202
A	Pikp-1:ancHMA_AMEGNND+Pikp-2+AVR-PikD	18	0	170202
A	Pikp-1:ancHMA_AMEGNND+Pikp-2+AVRblb2	18	0	170202
A	Pikp-1:ancHMA_AMEGNND+ev+AVRblb2	18	0	170202
A	Pikp-1+Pikp-2+AVR-PikD	19	2	170202
A	Pikp-1:ancHMA+Pikp-2+AVR-PikD	19	2	170202
A	Pikp-1:ancHMA+Pikp-2+AVRblb2	19	3	170202
A	Pikp-1:ancHMA+ev+AVRblb2	19	0	170202
A	Pikp-1+Pikp-2+AVRblb2	19	0	170202
A	Pikp-1:ancHMA_AMEGNND+Pikp-2+AVR-PikD	19	0	170202
A	Pikp-1:ancHMA_AMEGNND+Pikp-2+AVRblb2	19	0	170202
A	Pikp-1:ancHMA_AMEGNND+ev+AVRblb2	19	0	170202
A	Pikp-1+Pikp-2+AVR-PikD	20	2	170202
A	Pikp-1:ancHMA+Pikp-2+AVR-PikD	20	2	170202
A	Pikp-1:ancHMA+Pikp-2+AVRblb2	20	3	170202
A	Pikp-1:ancHMA+ev+AVRblb2	20	0	170202
A	Pikp-1+Pikp-2+AVRblb2	20	0	170202
A	Pikp-1:ancHMA_AMEGNND+Pikp-2+AVR-PikD	20	0	170202
A	Pikp-1:ancHMA_AMEGNND+Pikp-2+AVRblb2	20	0	170202
A	Pikp-1:ancHMA_AMEGNND+ev+AVRblb2	20	0	170202
A	Pikp-1+Pikp-2+AVR-PikD	21	2	170202
A	Pikp-1:ancHMA+Pikp-2+AVR-PikD	21	4	170202
A	Pikp-1:ancHMA+Pikp-2+AVRblb2	21	4	170202
A	Pikp-1:ancHMA+ev+AVRblb2	21	0	170202
A	Pikp-1+Pikp-2+AVRblb2	21	0	170202
A	Pikp-1:ancHMA_AMEGNND+Pikp-2+AVR-PikD	21	0	170202
A	Pikp-1:ancHMA_AMEGNND+Pikp-2+AVRblb2	21	0	170202
A	Pikp-1:ancHMA_AMEGNND+ev+AVRblb2	21	0	170202
A	Pikp-1+Pikp-2+AVR-PikD	22	3	170202
A	Pikp-1:ancHMA+Pikp-2+AVR-PikD	22	3	170202
A	Pikp-1:ancHMA+Pikp-2+AVRblb2	22	3	170202
A	Pikp-1:ancHMA+ev+AVRblb2	22	0	170202
A	Pikp-1+Pikp-2+AVRblb2	22	0	170202
A	Pikp-1:ancHMA_AMEGNND+Pikp-2+AVR-PikD	22	0	170202
A	Pikp-1:ancHMA_AMEGNND+Pikp-2+AVRblb2	22	0	170202
A	Pikp-1:ancHMA_AMEGNND+ev+AVRblb2	22	0	170202
A	Pikp-1+Pikp-2+AVR-PikD	23	2	170202
A	Pikp-1:ancHMA+Pikp-2+AVR-PikD	23	4	170202
A	Pikp-1:ancHMA+Pikp-2+AVRblb2	23	4	170202
A	Pikp-1:ancHMA+ev+AVRblb2	23	0	170202
A	Pikp-1+Pikp-2+AVRblb2	23	0	170202
A	Pikp-1:ancHMA_AMEGNND+Pikp-2+AVR-PikD	23	0	170202
A	Pikp-1:ancHMA_AMEGNND+Pikp-2+AVRblb2	23	0	170202
A	Pikp-1:ancHMA_AMEGNND+ev+AVRblb2	23	0	170202
A	Pikp-1+Pikp-2+AVR-PikD	24	2	170202
A	Pikp-1:ancHMA+Pikp-2+AVR-PikD	24	2	170202
A	Pikp-1:ancHMA+Pikp-2+AVRblb2	24	3	170202
A	Pikp-1:ancHMA+ev+AVRblb2	24	0	170202
A	Pikp-1+Pikp-2+AVRblb2	24	0	170202
A	Pikp-1:ancHMA_AMEGNND+Pikp-2+AVR-PikD	24	0	170202
A	Pikp-1:ancHMA_AMEGNND+Pikp-2+AVRblb2	24	0	170202
A	Pikp-1:ancHMA_AMEGNND+ev+AVRblb2	24	0	170202
A	Pikp-1+Pikp-2+AVR-PikD	1	2	170209
A	Pikp-1:ancHMA+Pikp-2+AVR-PikD	1	2	170209
A	Pikp-1:ancHMA+Pikp-2+AVRblb2	1	2	170209
A	Pikp-1:ancHMA+ev+AVRblb2	1	0	170209
A	Pikp-1+Pikp-2+AVRblb2	1	0	170209
A	Pikp-1:ancHMA_AMEGNND+Pikp-2+AVR-PikD	1	0	170209
A	Pikp-1:ancHMA_AMEGNND+Pikp-2+AVRblb2	1	0	170209
A	Pikp-1:ancHMA_AMEGNND+ev+AVRblb2	1	0	170209
A	Pikp-1+Pikp-2+AVR-PikD	2	2	170209
A	Pikp-1:ancHMA+Pikp-2+AVR-PikD	2	2	170209
A	Pikp-1:ancHMA+Pikp-2+AVRblb2	2	2.5	170209
A	Pikp-1:ancHMA+ev+AVRblb2	2	0	170209
A	Pikp-1+Pikp-2+AVRblb2	2	0	170209
A	Pikp-1:ancHMA_AMEGNND+Pikp-2+AVR-PikD	2	0	170209
A	Pikp-1:ancHMA_AMEGNND+Pikp-2+AVRblb2	2	0	170209
A	Pikp-1:ancHMA_AMEGNND+ev+AVRblb2	2	0	170209
A	Pikp-1+Pikp-2+AVR-PikD	3	2	170209
A	Pikp-1:ancHMA+Pikp-2+AVR-PikD	3	2	170209
A	Pikp-1:ancHMA+Pikp-2+AVRblb2	3	3	170209
A	Pikp-1:ancHMA+ev+AVRblb2	3	0	170209
A	Pikp-1+Pikp-2+AVRblb2	3	0	170209
A	Pikp-1:ancHMA_AMEGNND+Pikp-2+AVR-PikD	3	0	170209
A	Pikp-1:ancHMA_AMEGNND+Pikp-2+AVRblb2	3	0	170209
A	Pikp-1:ancHMA_AMEGNND+ev+AVRblb2	3	0	170209
A	Pikp-1+Pikp-2+AVR-PikD	4	2	170209
A	Pikp-1:ancHMA+Pikp-2+AVR-PikD	4	2	170209
A	Pikp-1:ancHMA+Pikp-2+AVRblb2	4	3	170209
A	Pikp-1:ancHMA+ev+AVRblb2	4	0	170209
A	Pikp-1+Pikp-2+AVRblb2	4	0	170209
A	Pikp-1:ancHMA_AMEGNND+Pikp-2+AVR-PikD	4	0	170209
A	Pikp-1:ancHMA_AMEGNND+Pikp-2+AVRblb2	4	0	170209
A	Pikp-1:ancHMA_AMEGNND+ev+AVRblb2	4	0	170209
A	Pikp-1+Pikp-2+AVR-PikD	5	2	170209
A	Pikp-1:ancHMA+Pikp-2+AVR-PikD	5	2	170209
A	Pikp-1:ancHMA+Pikp-2+AVRblb2	5	2.5	170209
A	Pikp-1:ancHMA+ev+AVRblb2	5	0	170209
A	Pikp-1+Pikp-2+AVRblb2	5	0	170209
A	Pikp-1:ancHMA_AMEGNND+Pikp-2+AVR-PikD	5	0	170209
A	Pikp-1:ancHMA_AMEGNND+Pikp-2+AVRblb2	5	0	170209
A	Pikp-1:ancHMA_AMEGNND+ev+AVRblb2	5	0	170209
A	Pikp-1+Pikp-2+AVR-PikD	6	2	170209
A	Pikp-1:ancHMA+Pikp-2+AVR-PikD	6	2	170209
A	Pikp-1:ancHMA+Pikp-2+AVRblb2	6	3	170209
A	Pikp-1:ancHMA+ev+AVRblb2	6	0	170209
A	Pikp-1+Pikp-2+AVRblb2	6	0	170209
A	Pikp-1:ancHMA_AMEGNND+Pikp-2+AVR-PikD	6	0	170209
A	Pikp-1:ancHMA_AMEGNND+Pikp-2+AVRblb2	6	0	170209
A	Pikp-1:ancHMA_AMEGNND+ev+AVRblb2	6	0	170209
A	Pikp-1+Pikp-2+AVR-PikD	7	2.5	170209
A	Pikp-1:ancHMA+Pikp-2+AVR-PikD	7	2	170209
A	Pikp-1:ancHMA+Pikp-2+AVRblb2	7	2	170209
A	Pikp-1:ancHMA+ev+AVRblb2	7	0	170209
A	Pikp-1+Pikp-2+AVRblb2	7	0	170209
A	Pikp-1:ancHMA_AMEGNND+Pikp-2+AVR-PikD	7	0	170209
A	Pikp-1:ancHMA_AMEGNND+Pikp-2+AVRblb2	7	0	170209
A	Pikp-1:ancHMA_AMEGNND+ev+AVRblb2	7	0	170209
A	Pikp-1+Pikp-2+AVR-PikD	8	2.5	170209
A	Pikp-1:ancHMA+Pikp-2+AVR-PikD	8	2.5	170209
A	Pikp-1:ancHMA+Pikp-2+AVRblb2	8	3	170209
A	Pikp-1:ancHMA+ev+AVRblb2	8	0	170209
A	Pikp-1+Pikp-2+AVRblb2	8	0	170209
A	Pikp-1:ancHMA_AMEGNND+Pikp-2+AVR-PikD	8	0	170209
A	Pikp-1:ancHMA_AMEGNND+Pikp-2+AVRblb2	8	0	170209
A	Pikp-1:ancHMA_AMEGNND+ev+AVRblb2	8	0	170209
A	Pikp-1+Pikp-2+AVR-PikD	9	1	170209
A	Pikp-1:ancHMA+Pikp-2+AVR-PikD	9	1	170209
A	Pikp-1:ancHMA+Pikp-2+AVRblb2	9	1	170209
A	Pikp-1:ancHMA+ev+AVRblb2	9	0	170209
A	Pikp-1+Pikp-2+AVRblb2	9	0	170209
A	Pikp-1:ancHMA_AMEGNND+Pikp-2+AVR-PikD	9	0	170209
A	Pikp-1:ancHMA_AMEGNND+Pikp-2+AVRblb2	9	0	170209
A	Pikp-1:ancHMA_AMEGNND+ev+AVRblb2	9	0	170209
A	Pikp-1+Pikp-2+AVR-PikD	10	2	170209
A	Pikp-1:ancHMA+Pikp-2+AVR-PikD	10	2	170209
A	Pikp-1:ancHMA+Pikp-2+AVRblb2	10	3	170209
A	Pikp-1:ancHMA+ev+AVRblb2	10	0	170209
A	Pikp-1+Pikp-2+AVRblb2	10	0	170209
A	Pikp-1:ancHMA_AMEGNND+Pikp-2+AVR-PikD	10	0	170209
A	Pikp-1:ancHMA_AMEGNND+Pikp-2+AVRblb2	10	0	170209
A	Pikp-1:ancHMA_AMEGNND+ev+AVRblb2	10	0	170209
A	Pikp-1+Pikp-2+AVR-PikD	11	2.5	170209
A	Pikp-1:ancHMA+Pikp-2+AVR-PikD	11	2.5	170209
A	Pikp-1:ancHMA+Pikp-2+AVRblb2	11	3	170209
A	Pikp-1:ancHMA+ev+AVRblb2	11	0	170209
A	Pikp-1+Pikp-2+AVRblb2	11	0	170209
A	Pikp-1:ancHMA_AMEGNND+Pikp-2+AVR-PikD	11	0	170209
A	Pikp-1:ancHMA_AMEGNND+Pikp-2+AVRblb2	11	0	170209
A	Pikp-1:ancHMA_AMEGNND+ev+AVRblb2	11	0	170209
A	Pikp-1+Pikp-2+AVR-PikD	12	3	170209
A	Pikp-1:ancHMA+Pikp-2+AVR-PikD	12	2.5	170209
A	Pikp-1:ancHMA+Pikp-2+AVRblb2	12	3	170209
A	Pikp-1:ancHMA+ev+AVRblb2	12	0	170209
A	Pikp-1+Pikp-2+AVRblb2	12	0	170209
A	Pikp-1:ancHMA_AMEGNND+Pikp-2+AVR-PikD	12	0	170209
A	Pikp-1:ancHMA_AMEGNND+Pikp-2+AVRblb2	12	0	170209
A	Pikp-1:ancHMA_AMEGNND+ev+AVRblb2	12	0	170209
A	Pikp-1+Pikp-2+AVR-PikD	13	2	170209
A	Pikp-1:ancHMA+Pikp-2+AVR-PikD	13	2	170209
A	Pikp-1:ancHMA+Pikp-2+AVRblb2	13	2.5	170209
A	Pikp-1:ancHMA+ev+AVRblb2	13	0	170209
A	Pikp-1+Pikp-2+AVRblb2	13	0	170209
A	Pikp-1:ancHMA_AMEGNND+Pikp-2+AVR-PikD	13	0	170209
A	Pikp-1:ancHMA_AMEGNND+Pikp-2+AVRblb2	13	0	170209
A	Pikp-1:ancHMA_AMEGNND+ev+AVRblb2	13	0	170209
A	Pikp-1+Pikp-2+AVR-PikD	14	2	170209
A	Pikp-1:ancHMA+Pikp-2+AVR-PikD	14	2	170209
A	Pikp-1:ancHMA+Pikp-2+AVRblb2	14	3	170209
A	Pikp-1:ancHMA+ev+AVRblb2	14	0	170209
A	Pikp-1+Pikp-2+AVRblb2	14	0	170209
A	Pikp-1:ancHMA_AMEGNND+Pikp-2+AVR-PikD	14	0	170209
A	Pikp-1:ancHMA_AMEGNND+Pikp-2+AVRblb2	14	0	170209
A	Pikp-1:ancHMA_AMEGNND+ev+AVRblb2	14	0	170209
A	Pikp-1+Pikp-2+AVR-PikD	15	2	170209
A	Pikp-1:ancHMA+Pikp-2+AVR-PikD	15	2	170209
A	Pikp-1:ancHMA+Pikp-2+AVRblb2	15	2	170209
A	Pikp-1:ancHMA+ev+AVRblb2	15	0	170209
A	Pikp-1+Pikp-2+AVRblb2	15	0	170209
A	Pikp-1:ancHMA_AMEGNND+Pikp-2+AVR-PikD	15	0	170209
A	Pikp-1:ancHMA_AMEGNND+Pikp-2+AVRblb2	15	0	170209
A	Pikp-1:ancHMA_AMEGNND+ev+AVRblb2	15	0	170209
A	Pikp-1+Pikp-2+AVR-PikD	16	2	170209
A	Pikp-1:ancHMA+Pikp-2+AVR-PikD	16	2	170209
A	Pikp-1:ancHMA+Pikp-2+AVRblb2	16	2.5	170209
A	Pikp-1:ancHMA+ev+AVRblb2	16	0	170209
A	Pikp-1+Pikp-2+AVRblb2	16	0	170209
A	Pikp-1:ancHMA_AMEGNND+Pikp-2+AVR-PikD	16	0	170209
A	Pikp-1:ancHMA_AMEGNND+Pikp-2+AVRblb2	16	0	170209
A	Pikp-1:ancHMA_AMEGNND+ev+AVRblb2	16	0	170209
A	Pikp-1+Pikp-2+AVR-PikD	17	2.5	170209
A	Pikp-1:ancHMA+Pikp-2+AVR-PikD	17	2.5	170209
A	Pikp-1:ancHMA+Pikp-2+AVRblb2	17	3	170209
A	Pikp-1:ancHMA+ev+AVRblb2	17	0	170209
A	Pikp-1+Pikp-2+AVRblb2	17	0	170209
A	Pikp-1:ancHMA_AMEGNND+Pikp-2+AVR-PikD	17	0	170209
A	Pikp-1:ancHMA_AMEGNND+Pikp-2+AVRblb2	17	0	170209
A	Pikp-1:ancHMA_AMEGNND+ev+AVRblb2	17	0	170209
A	Pikp-1+Pikp-2+AVR-PikD	18	2	170209
A	Pikp-1:ancHMA+Pikp-2+AVR-PikD	18	2	170209
A	Pikp-1:ancHMA+Pikp-2+AVRblb2	18	2.5	170209
A	Pikp-1:ancHMA+ev+AVRblb2	18	0	170209
A	Pikp-1+Pikp-2+AVRblb2	18	0	170209
A	Pikp-1:ancHMA_AMEGNND+Pikp-2+AVR-PikD	18	0	170209
A	Pikp-1:ancHMA_AMEGNND+Pikp-2+AVRblb2	18	0	170209
A	Pikp-1:ancHMA_AMEGNND+ev+AVRblb2	18	0	170209
A	Pikp-1+Pikp-2+AVR-PikD	19	2	170209
A	Pikp-1:ancHMA+Pikp-2+AVR-PikD	19	2	170209
A	Pikp-1:ancHMA+Pikp-2+AVRblb2	19	2	170209
A	Pikp-1:ancHMA+ev+AVRblb2	19	0	170209
A	Pikp-1+Pikp-2+AVRblb2	19	0	170209
A	Pikp-1:ancHMA_AMEGNND+Pikp-2+AVR-PikD	19	0	170209
A	Pikp-1:ancHMA_AMEGNND+Pikp-2+AVRblb2	19	0	170209
A	Pikp-1:ancHMA_AMEGNND+ev+AVRblb2	19	0	170209
A	Pikp-1+Pikp-2+AVR-PikD	20	2	170209
A	Pikp-1:ancHMA+Pikp-2+AVR-PikD	20	1.5	170209
A	Pikp-1:ancHMA+Pikp-2+AVRblb2	20	2	170209
A	Pikp-1:ancHMA+ev+AVRblb2	20	0	170209
A	Pikp-1+Pikp-2+AVRblb2	20	0	170209
A	Pikp-1:ancHMA_AMEGNND+Pikp-2+AVR-PikD	20	0	170209
A	Pikp-1:ancHMA_AMEGNND+Pikp-2+AVRblb2	20	0	170209
A	Pikp-1:ancHMA_AMEGNND+ev+AVRblb2	20	0	170209
A	Pikp-1+Pikp-2+AVR-PikD	21	3	170209
A	Pikp-1:ancHMA+Pikp-2+AVR-PikD	21	2.5	170209
A	Pikp-1:ancHMA+Pikp-2+AVRblb2	21	3	170209
A	Pikp-1:ancHMA+ev+AVRblb2	21	0	170209
A	Pikp-1+Pikp-2+AVRblb2	21	0	170209
A	Pikp-1:ancHMA_AMEGNND+Pikp-2+AVR-PikD	21	0	170209
A	Pikp-1:ancHMA_AMEGNND+Pikp-2+AVRblb2	21	0	170209
A	Pikp-1:ancHMA_AMEGNND+ev+AVRblb2	21	0	170209
A	Pikp-1+Pikp-2+AVR-PikD	22	2	170209
A	Pikp-1:ancHMA+Pikp-2+AVR-PikD	22	2	170209
A	Pikp-1:ancHMA+Pikp-2+AVRblb2	22	3	170209
A	Pikp-1:ancHMA+ev+AVRblb2	22	0	170209
A	Pikp-1+Pikp-2+AVRblb2	22	0	170209
A	Pikp-1:ancHMA_AMEGNND+Pikp-2+AVR-PikD	22	0	170209
A	Pikp-1:ancHMA_AMEGNND+Pikp-2+AVRblb2	22	0	170209
A	Pikp-1:ancHMA_AMEGNND+ev+AVRblb2	22	0	170209
A	Pikp-1+Pikp-2+AVR-PikD	23	2	170209
A	Pikp-1:ancHMA+Pikp-2+AVR-PikD	23	2	170209
A	Pikp-1:ancHMA+Pikp-2+AVRblb2	23	2	170209
A	Pikp-1:ancHMA+ev+AVRblb2	23	0	170209
A	Pikp-1+Pikp-2+AVRblb2	23	0	170209
A	Pikp-1:ancHMA_AMEGNND+Pikp-2+AVR-PikD	23	0	170209
A	Pikp-1:ancHMA_AMEGNND+Pikp-2+AVRblb2	23	0	170209
A	Pikp-1:ancHMA_AMEGNND+ev+AVRblb2	23	0	170209
A	Pikp-1+Pikp-2+AVR-PikD	24	2.5	170209
A	Pikp-1:ancHMA+Pikp-2+AVR-PikD	24	2	170209
A	Pikp-1:ancHMA+Pikp-2+AVRblb2	24	2	170209
A	Pikp-1:ancHMA+ev+AVRblb2	24	0	170209
A	Pikp-1+Pikp-2+AVRblb2	24	0	170209
A	Pikp-1:ancHMA_AMEGNND+Pikp-2+AVR-PikD	24	0	170209
A	Pikp-1:ancHMA_AMEGNND+Pikp-2+AVRblb2	24	0	170209
A	Pikp-1:ancHMA_AMEGNND+ev+AVRblb2	24	0	170209
A	Pikp-1+Pikp-2+AVR-PikD	1	1.5	181130
A	1:ancHMA+2+AVR-PikD	1	2.5	181130
A	1:ancHMA+Pikp-2+AVRblb2	1	3	181130
A	1:ancHMA+ev+AVRblb2	1	0	181130
A	Pikp-1+Pikp-2+AVRblb2	1	0.5	181130
A	Pikp-1:ancHMA-AMEGNND+Pikp-2+AVR-PikD	1	0	181130
A	1:ancHMA-AMEGNND+Pikp-2+AVRblb2	1	0	181130
A	1:ancHMA-AMEGNND+ev+AVRblb2	1	0	181130
A	Pikp-1+Pikp-2+AVR-PikD	2	3	181130
A	1:ancHMA+2+AVR-PikD	2	3.5	181130
A	1:ancHMA+Pikp-2+AVRblb2	2	3.5	181130
A	1:ancHMA+ev+AVRblb2	2	0	181130
A	Pikp-1+Pikp-2+AVRblb2	2	0.5	181130
A	Pikp-1:ancHMA-AMEGNND+Pikp-2+AVR-PikD	2	0	181130
A	1:ancHMA-AMEGNND+Pikp-2+AVRblb2	2	0	181130
A	1:ancHMA-AMEGNND+ev+AVRblb2	2	0	181130
A	Pikp-1+Pikp-2+AVR-PikD	3	3.5	181130
A	1:ancHMA+2+AVR-PikD	3	4	181130
A	1:ancHMA+Pikp-2+AVRblb2	3	4	181130
A	1:ancHMA+ev+AVRblb2	3	0	181130
A	Pikp-1+Pikp-2+AVRblb2	3	1	181130
A	Pikp-1:ancHMA-AMEGNND+Pikp-2+AVR-PikD	3	0	181130
A	1:ancHMA-AMEGNND+Pikp-2+AVRblb2	3	0	181130
A	1:ancHMA-AMEGNND+ev+AVRblb2	3	0	181130
A	Pikp-1+Pikp-2+AVR-PikD	4	2.5	181130
A	1:ancHMA+2+AVR-PikD	4	4	181130
A	1:ancHMA+Pikp-2+AVRblb2	4	3.5	181130
A	1:ancHMA+ev+AVRblb2	4	0	181130
A	Pikp-1+Pikp-2+AVRblb2	4	0.5	181130
A	Pikp-1:ancHMA-AMEGNND+Pikp-2+AVR-PikD	4	0	181130
A	1:ancHMA-AMEGNND+Pikp-2+AVRblb2	4	0	181130
A	1:ancHMA-AMEGNND+ev+AVRblb2	4	0	181130
A	Pikp-1+Pikp-2+AVR-PikD	5	3.5	181130
A	1:ancHMA+2+AVR-PikD	5	4	181130
A	1:ancHMA+Pikp-2+AVRblb2	5	4	181130
A	1:ancHMA+ev+AVRblb2	5	0	181130
A	Pikp-1+Pikp-2+AVRblb2	5	0.5	181130
A	Pikp-1:ancHMA-AMEGNND+Pikp-2+AVR-PikD	5	0	181130
A	1:ancHMA-AMEGNND+Pikp-2+AVRblb2	5	0	181130
A	1:ancHMA-AMEGNND+ev+AVRblb2	5	0	181130
A	Pikp-1+Pikp-2+AVR-PikD	6	3.5	181130
A	1:ancHMA+2+AVR-PikD	6	4	181130
A	1:ancHMA+Pikp-2+AVRblb2	6	4	181130
A	1:ancHMA+ev+AVRblb2	6	0	181130
A	Pikp-1+Pikp-2+AVRblb2	6	0.5	181130
A	Pikp-1:ancHMA-AMEGNND+Pikp-2+AVR-PikD	6	0	181130
A	1:ancHMA-AMEGNND+Pikp-2+AVRblb2	6	0	181130
A	1:ancHMA-AMEGNND+ev+AVRblb2	6	0	181130
A	Pikp-1+Pikp-2+AVR-PikD	7	2	181130
A	1:ancHMA+2+AVR-PikD	7	3.5	181130
A	1:ancHMA+Pikp-2+AVRblb2	7	3.5	181130
A	1:ancHMA+ev+AVRblb2	7	0	181130
A	Pikp-1+Pikp-2+AVRblb2	7	0.5	181130
A	Pikp-1:ancHMA-AMEGNND+Pikp-2+AVR-PikD	7	0	181130
A	1:ancHMA-AMEGNND+Pikp-2+AVRblb2	7	0	181130
A	1:ancHMA-AMEGNND+ev+AVRblb2	7	0	181130
A	Pikp-1+Pikp-2+AVR-PikD	8	2	181130
A	1:ancHMA+2+AVR-PikD	8	3.5	181130
A	1:ancHMA+Pikp-2+AVRblb2	8	3.5	181130
A	1:ancHMA+ev+AVRblb2	8	0	181130
A	Pikp-1+Pikp-2+AVRblb2	8	0.5	181130
A	Pikp-1:ancHMA-AMEGNND+Pikp-2+AVR-PikD	8	0	181130
A	1:ancHMA-AMEGNND+Pikp-2+AVRblb2	8	0	181130
A	1:ancHMA-AMEGNND+ev+AVRblb2	8	0	181130
A	Pikp-1+Pikp-2+AVR-PikD	9	2.5	181130
A	1:ancHMA+2+AVR-PikD	9	4	181130
A	1:ancHMA+Pikp-2+AVRblb2	9	4	181130
A	1:ancHMA+ev+AVRblb2	9	0	181130
A	Pikp-1+Pikp-2+AVRblb2	9	1	181130
A	Pikp-1:ancHMA-AMEGNND+Pikp-2+AVR-PikD	9	0	181130
A	1:ancHMA-AMEGNND+Pikp-2+AVRblb2	9	0	181130
A	1:ancHMA-AMEGNND+ev+AVRblb2	9	0	181130
A	Pikp-1+Pikp-2+AVR-PikD	10	2	181130
A	1:ancHMA+2+AVR-PikD	10	3.5	181130
A	1:ancHMA+Pikp-2+AVRblb2	10	3	181130
A	1:ancHMA+ev+AVRblb2	10	0	181130
A	Pikp-1+Pikp-2+AVRblb2	10	0	181130
A	Pikp-1:ancHMA-AMEGNND+Pikp-2+AVR-PikD	10	0	181130
A	1:ancHMA-AMEGNND+Pikp-2+AVRblb2	10	0	181130
A	1:ancHMA-AMEGNND+ev+AVRblb2	10	0	181130
A	Pikp-1+Pikp-2+AVR-PikD	11	1	181130
A	1:ancHMA+2+AVR-PikD	11	5	181130
A	1:ancHMA+Pikp-2+AVRblb2	11	2.5	181130
A	1:ancHMA+ev+AVRblb2	11	0	181130
A	Pikp-1+Pikp-2+AVRblb2	11	0	181130
A	Pikp-1:ancHMA-AMEGNND+Pikp-2+AVR-PikD	11	0	181130
A	1:ancHMA-AMEGNND+Pikp-2+AVRblb2	11	0	181130
A	1:ancHMA-AMEGNND+ev+AVRblb2	11	0	181130
A	Pikp-1+Pikp-2+AVR-PikD	12	1	181130
A	1:ancHMA+2+AVR-PikD	12	2.5	181130
A	1:ancHMA+Pikp-2+AVRblb2	12	2.5	181130
A	1:ancHMA+ev+AVRblb2	12	0	181130
A	Pikp-1+Pikp-2+AVRblb2	12	0	181130
A	Pikp-1:ancHMA-AMEGNND+Pikp-2+AVR-PikD	12	0	181130
A	1:ancHMA-AMEGNND+Pikp-2+AVRblb2	12	0	181130
A	1:ancHMA-AMEGNND+ev+AVRblb2	12	0	181130
A	Pikp-1+Pikp-2+AVR-PikD	13	2	181130
A	1:ancHMA+2+AVR-PikD	13	3	181130
A	1:ancHMA+Pikp-2+AVRblb2	13	3.5	181130
A	1:ancHMA+ev+AVRblb2	13	0	181130
A	Pikp-1+Pikp-2+AVRblb2	13	2	181130
A	Pikp-1:ancHMA-AMEGNND+Pikp-2+AVR-PikD	13	0	181130
A	1:ancHMA-AMEGNND+Pikp-2+AVRblb2	13	0	181130
A	1:ancHMA-AMEGNND+ev+AVRblb2	13	0	181130
A	Pikp-1+Pikp-2+AVR-PikD	14	2	181130
A	1:ancHMA+2+AVR-PikD	14	2.5	181130
A	1:ancHMA+Pikp-2+AVRblb2	14	3	181130
A	1:ancHMA+ev+AVRblb2	14	0	181130
A	Pikp-1+Pikp-2+AVRblb2	14	0	181130
A	Pikp-1:ancHMA-AMEGNND+Pikp-2+AVR-PikD	14	0	181130
A	1:ancHMA-AMEGNND+Pikp-2+AVRblb2	14	0	181130
A	1:ancHMA-AMEGNND+ev+AVRblb2	14	0	181130
A	Pikp-1+Pikp-2+AVR-PikD	15	2	181130
A	1:ancHMA+2+AVR-PikD	15	1.5	181130
A	1:ancHMA+Pikp-2+AVRblb2	15	2	181130
A	1:ancHMA+ev+AVRblb2	15	0	181130
A	Pikp-1+Pikp-2+AVRblb2	15	2	181130
A	Pikp-1:ancHMA-AMEGNND+Pikp-2+AVR-PikD	15	0	181130
A	1:ancHMA-AMEGNND+Pikp-2+AVRblb2	15	0	181130
A	1:ancHMA-AMEGNND+ev+AVRblb2	15	0	181130
A	Pikp-1+Pikp-2+AVR-PikD	16	3	181130
A	1:ancHMA+2+AVR-PikD	16	4	181130
A	1:ancHMA+Pikp-2+AVRblb2	16	4	181130
A	1:ancHMA+ev+AVRblb2	16	0	181130
A	Pikp-1+Pikp-2+AVRblb2	16	0.5	181130
A	Pikp-1:ancHMA-AMEGNND+Pikp-2+AVR-PikD	16	0	181130
A	1:ancHMA-AMEGNND+Pikp-2+AVRblb2	16	0	181130
A	1:ancHMA-AMEGNND+ev+AVRblb2	16	0	181130
A	Pikp-1+Pikp-2+AVR-PikD	17	2	181130
A	1:ancHMA+2+AVR-PikD	17	3	181130
A	1:ancHMA+Pikp-2+AVRblb2	17	3	181130
A	1:ancHMA+ev+AVRblb2	17	0	181130
A	Pikp-1+Pikp-2+AVRblb2	17	1	181130
A	Pikp-1:ancHMA-AMEGNND+Pikp-2+AVR-PikD	17	0	181130
A	1:ancHMA-AMEGNND+Pikp-2+AVRblb2	17	0	181130
A	1:ancHMA-AMEGNND+ev+AVRblb2	17	0	181130
A	Pikp-1+Pikp-2+AVR-PikD	18	2.5	181130
A	1:ancHMA+2+AVR-PikD	18	4	181130
A	1:ancHMA+Pikp-2+AVRblb2	18	3	181130
A	1:ancHMA+ev+AVRblb2	18	0	181130
A	Pikp-1+Pikp-2+AVRblb2	18	0.5	181130
A	Pikp-1:ancHMA-AMEGNND+Pikp-2+AVR-PikD	18	0	181130
A	1:ancHMA-AMEGNND+Pikp-2+AVRblb2	18	0	181130
A	1:ancHMA-AMEGNND+ev+AVRblb2	18	0	181130
A	Pikp-1+Pikp-2+AVR-PikD	19	1	181130
A	1:ancHMA+2+AVR-PikD	19	2.5	181130
A	1:ancHMA+Pikp-2+AVRblb2	19	2.5	181130
A	1:ancHMA+ev+AVRblb2	19	0	181130
A	Pikp-1+Pikp-2+AVRblb2	19	1	181130
A	Pikp-1:ancHMA-AMEGNND+Pikp-2+AVR-PikD	19	0	181130
A	1:ancHMA-AMEGNND+Pikp-2+AVRblb2	19	0	181130
A	1:ancHMA-AMEGNND+ev+AVRblb2	19	0	181130
A	Pikp-1+Pikp-2+AVR-PikD	20	2	181130
A	1:ancHMA+2+AVR-PikD	20	4	181130
A	1:ancHMA+Pikp-2+AVRblb2	20	4	181130
A	1:ancHMA+ev+AVRblb2	20	0	181130
A	Pikp-1+Pikp-2+AVRblb2	20	0	181130
A	Pikp-1:ancHMA-AMEGNND+Pikp-2+AVR-PikD	20	0	181130
A	1:ancHMA-AMEGNND+Pikp-2+AVRblb2	20	0	181130
A	1:ancHMA-AMEGNND+ev+AVRblb2	20	0	181130
A	Pikp-1+Pikp-2+AVR-PikD	21	3	181130
A	1:ancHMA+2+AVR-PikD	21	4	181130
A	1:ancHMA+Pikp-2+AVRblb2	21	4	181130
A	1:ancHMA+ev+AVRblb2	21	0	181130
A	Pikp-1+Pikp-2+AVRblb2	21	0	181130
A	Pikp-1:ancHMA-AMEGNND+Pikp-2+AVR-PikD	21	0	181130
A	1:ancHMA-AMEGNND+Pikp-2+AVRblb2	21	0	181130
A	1:ancHMA-AMEGNND+ev+AVRblb2	21	0	181130
A	Pikp-1+Pikp-2+AVR-PikD	22	2	181130
A	1:ancHMA+2+AVR-PikD	22	3.5	181130
A	1:ancHMA+Pikp-2+AVRblb2	22	3.5	181130
A	1:ancHMA+ev+AVRblb2	22	0	181130
A	Pikp-1+Pikp-2+AVRblb2	22	2	181130
A	Pikp-1:ancHMA-AMEGNND+Pikp-2+AVR-PikD	22	0	181130
A	1:ancHMA-AMEGNND+Pikp-2+AVRblb2	22	0	181130
A	1:ancHMA-AMEGNND+ev+AVRblb2	22	0	181130
A	Pikp-1+Pikp-2+AVR-PikD	23	2	181130
A	1:ancHMA+2+AVR-PikD	23	2	181130
A	1:ancHMA+Pikp-2+AVRblb2	23	2	181130
A	1:ancHMA+ev+AVRblb2	23	0	181130
A	Pikp-1+Pikp-2+AVRblb2	23	2	181130
A	Pikp-1:ancHMA-AMEGNND+Pikp-2+AVR-PikD	23	0	181130
A	1:ancHMA-AMEGNND+Pikp-2+AVRblb2	23	0	181130
A	1:ancHMA-AMEGNND+ev+AVRblb2	23	0	181130
A	Pikp-1+Pikp-2+AVR-PikD	24	2	181130
A	1:ancHMA+2+AVR-PikD	24	4	181130
A	1:ancHMA+Pikp-2+AVRblb2	24	4	181130
A	1:ancHMA+ev+AVRblb2	24	0	181130
A	Pikp-1+Pikp-2+AVRblb2	24	2	181130
A	Pikp-1:ancHMA-AMEGNND+Pikp-2+AVR-PikD	24	0	181130
A	1:ancHMA-AMEGNND+Pikp-2+AVRblb2	24	0	181130
A	1:ancHMA-AMEGNND+ev+AVRblb2	24	0	181130

## Sheet: ancHMA-LVKIE
setup	condition	leaf	score	replicate
B	Pikp-1+Pikp-2+AVR-PikD	1	2	170202		Replicate: each replicate has a unique 6 digit identifier
B	Pikp-1:ancHMA+Pikp-2+AVR-PikD	1	2	170202		ev: empty vector
B	Pikp-1:ancHMA+Pikp-2+AVRblb2	1	3	170202
B	Pikp-1:ancHMA+ev+AVRblb2	1	0	170202
B	Pikp-1+Pikp-2+AVRblb2	1	0	170202
B	Pikp-1:ancHMA-LVKIE+Pikp-2+AVR-PikD	1	3.5	170202
B	Pikp-1:ancHMA-LVKIE+Pikp-2+AVRblb2	1	3.5	170202
B	Pikp-1:ancHMA-LVKIE+ev+AVRblb2	1	0	170202
B	Pikp-1+Pikp-2+AVR-PikD	2	2	170202
B	Pikp-1:ancHMA+Pikp-2+AVR-PikD	2	2	170202
B	Pikp-1:ancHMA+Pikp-2+AVRblb2	2	2.5	170202
B	Pikp-1:ancHMA+ev+AVRblb2	2	0	170202
B	Pikp-1+Pikp-2+AVRblb2	2	0	170202
B	Pikp-1:ancHMA-LVKIE+Pikp-2+AVR-PikD	2	3	170202
B	Pikp-1:ancHMA-LVKIE+Pikp-2+AVRblb2	2	3	170202
B	Pikp-1:ancHMA-LVKIE+ev+AVRblb2	2	0	170202
B	Pikp-1+Pikp-2+AVR-PikD	3	2	170202
B	Pikp-1:ancHMA+Pikp-2+AVR-PikD	3	3	170202
B	Pikp-1:ancHMA+Pikp-2+AVRblb2	3	3	170202
B	Pikp-1:ancHMA+ev+AVRblb2	3	0	170202
B	Pikp-1+Pikp-2+AVRblb2	3	0	170202
B	Pikp-1:ancHMA-LVKIE+Pikp-2+AVR-PikD	3	3	170202
B	Pikp-1:ancHMA-LVKIE+Pikp-2+AVRblb2	3	3	170202
B	Pikp-1:ancHMA-LVKIE+ev+AVRblb2	3	0	170202
B	Pikp-1+Pikp-2+AVR-PikD	4	2	170202
B	Pikp-1:ancHMA+Pikp-2+AVR-PikD	4	2	170202
B	Pikp-1:ancHMA+Pikp-2+AVRblb2	4	2	170202
B	Pikp-1:ancHMA+ev+AVRblb2	4	0	170202
B	Pikp-1+Pikp-2+AVRblb2	4	0	170202
B	Pikp-1:ancHMA-LVKIE+Pikp-2+AVR-PikD	4	2	170202
B	Pikp-1:ancHMA-LVKIE+Pikp-2+AVRblb2	4	2	170202
B	Pikp-1:ancHMA-LVKIE+ev+AVRblb2	4	0	170202
B	Pikp-1+Pikp-2+AVR-PikD	5	3	170202
B	Pikp-1:ancHMA+Pikp-2+AVR-PikD	5	3	170202
B	Pikp-1:ancHMA+Pikp-2+AVRblb2	5	3	170202
B	Pikp-1:ancHMA+ev+AVRblb2	5	0	170202
B	Pikp-1+Pikp-2+AVRblb2	5	0	170202
B	Pikp-1:ancHMA-LVKIE+Pikp-2+AVR-PikD	5	3	170202
B	Pikp-1:ancHMA-LVKIE+Pikp-2+AVRblb2	5	3	170202
B	Pikp-1:ancHMA-LVKIE+ev+AVRblb2	5	0	170202
B	Pikp-1+Pikp-2+AVR-PikD	6	3	170202
B	Pikp-1:ancHMA+Pikp-2+AVR-PikD	6	2	170202
B	Pikp-1:ancHMA+Pikp-2+AVRblb2	6	2	170202
B	Pikp-1:ancHMA+ev+AVRblb2	6	0	170202
B	Pikp-1+Pikp-2+AVRblb2	6	0	170202
B	Pikp-1:ancHMA-LVKIE+Pikp-2+AVR-PikD	6	3	170202
B	Pikp-1:ancHMA-LVKIE+Pikp-2+AVRblb2	6	3	170202
B	Pikp-1:ancHMA-LVKIE+ev+AVRblb2	6	0	170202
B	Pikp-1+Pikp-2+AVR-PikD	7	2	170202
B	Pikp-1:ancHMA+Pikp-2+AVR-PikD	7	2	170202
B	Pikp-1:ancHMA+Pikp-2+AVRblb2	7	3	170202
B	Pikp-1:ancHMA+ev+AVRblb2	7	0	170202
B	Pikp-1+Pikp-2+AVRblb2	7	0	170202
B	Pikp-1:ancHMA-LVKIE+Pikp-2+AVR-PikD	7	3	170202
B	Pikp-1:ancHMA-LVKIE+Pikp-2+AVRblb2	7	3	170202
B	Pikp-1:ancHMA-LVKIE+ev+AVRblb2	7	0	170202
B	Pikp-1+Pikp-2+AVR-PikD	8	2	170202
B	Pikp-1:ancHMA+Pikp-2+AVR-PikD	8	2	170202
B	Pikp-1:ancHMA+Pikp-2+AVRblb2	8	2	170202
B	Pikp-1:ancHMA+ev+AVRblb2	8	0	170202
B	Pikp-1+Pikp-2+AVRblb2	8	0	170202
B	Pikp-1:ancHMA-LVKIE+Pikp-2+AVR-PikD	8	2	170202
B	Pikp-1:ancHMA-LVKIE+Pikp-2+AVRblb2	8	2	170202
B	Pikp-1:ancHMA-LVKIE+ev+AVRblb2	8	0	170202
B	Pikp-1+Pikp-2+AVR-PikD	9	3	170202
B	Pikp-1:ancHMA+Pikp-2+AVR-PikD	9	3	170202
B	Pikp-1:ancHMA+Pikp-2+AVRblb2	9	3.5	170202
B	Pikp-1:ancHMA+ev+AVRblb2	9	0	170202
B	Pikp-1+Pikp-2+AVRblb2	9	0	170202
B	Pikp-1:ancHMA-LVKIE+Pikp-2+AVR-PikD	9	2	170202
B	Pikp-1:ancHMA-LVKIE+Pikp-2+AVRblb2	9	3	170202
B	Pikp-1:ancHMA-LVKIE+ev+AVRblb2	9	0	170202
B	Pikp-1+Pikp-2+AVR-PikD	10	2	170202
B	Pikp-1:ancHMA+Pikp-2+AVR-PikD	10	2	170202
B	Pikp-1:ancHMA+Pikp-2+AVRblb2	10	2	170202
B	Pikp-1:ancHMA+ev+AVRblb2	10	0	170202
B	Pikp-1+Pikp-2+AVRblb2	10	0	170202
B	Pikp-1:ancHMA-LVKIE+Pikp-2+AVR-PikD	10	2	170202
B	Pikp-1:ancHMA-LVKIE+Pikp-2+AVRblb2	10	2	170202
B	Pikp-1:ancHMA-LVKIE+ev+AVRblb2	10	0	170202
B	Pikp-1+Pikp-2+AVR-PikD	11	2.5	170202
B	Pikp-1:ancHMA+Pikp-2+AVR-PikD	11	2.5	170202
B	Pikp-1:ancHMA+Pikp-2+AVRblb2	11	3	170202
B	Pikp-1:ancHMA+ev+AVRblb2	11	0	170202
B	Pikp-1+Pikp-2+AVRblb2	11	0	170202
B	Pikp-1:ancHMA-LVKIE+Pikp-2+AVR-PikD	11	2.5	170202
B	Pikp-1:ancHMA-LVKIE+Pikp-2+AVRblb2	11	2.5	170202
B	Pikp-1:ancHMA-LVKIE+ev+AVRblb2	11	0	170202
B	Pikp-1+Pikp-2+AVR-PikD	12	2	170202
B	Pikp-1:ancHMA+Pikp-2+AVR-PikD	12	3	170202
B	Pikp-1:ancHMA+Pikp-2+AVRblb2	12	2.5	170202
B	Pikp-1:ancHMA+ev+AVRblb2	12	0	170202
B	Pikp-1+Pikp-2+AVRblb2	12	0	170202
B	Pikp-1:ancHMA-LVKIE+Pikp-2+AVR-PikD	12	3	170202
B	Pikp-1:ancHMA-LVKIE+Pikp-2+AVRblb2	12	2.5	170202
B	Pikp-1:ancHMA-LVKIE+ev+AVRblb2	12	0	170202
B	Pikp-1+Pikp-2+AVR-PikD	13	2.5	170202
B	Pikp-1:ancHMA+Pikp-2+AVR-PikD	13	3	170202
B	Pikp-1:ancHMA+Pikp-2+AVRblb2	13	3	170202
B	Pikp-1:ancHMA+ev+AVRblb2	13	0	170202
B	Pikp-1+Pikp-2+AVRblb2	13	0	170202
B	Pikp-1:ancHMA-LVKIE+Pikp-2+AVR-PikD	13	3	170202
B	Pikp-1:ancHMA-LVKIE+Pikp-2+AVRblb2	13	3	170202
B	Pikp-1:ancHMA-LVKIE+ev+AVRblb2	13	0	170202
B	Pikp-1+Pikp-2+AVR-PikD	14	2	170202
B	Pikp-1:ancHMA+Pikp-2+AVR-PikD	14	2	170202
B	Pikp-1:ancHMA+Pikp-2+AVRblb2	14	3	170202
B	Pikp-1:ancHMA+ev+AVRblb2	14	0	170202
B	Pikp-1+Pikp-2+AVRblb2	14	0	170202
B	Pikp-1:ancHMA-LVKIE+Pikp-2+AVR-PikD	14	2	170202
B	Pikp-1:ancHMA-LVKIE+Pikp-2+AVRblb2	14	3	170202
B	Pikp-1:ancHMA-LVKIE+ev+AVRblb2	14	0	170202
B	Pikp-1+Pikp-2+AVR-PikD	15	2	170202
B	Pikp-1:ancHMA+Pikp-2+AVR-PikD	15	2	170202
B	Pikp-1:ancHMA+Pikp-2+AVRblb2	15	2.5	170202
B	Pikp-1:ancHMA+ev+AVRblb2	15	0	170202
B	Pikp-1+Pikp-2+AVRblb2	15	0	170202
B	Pikp-1:ancHMA-LVKIE+Pikp-2+AVR-PikD	15	2	170202
B	Pikp-1:ancHMA-LVKIE+Pikp-2+AVRblb2	15	2	170202
B	Pikp-1:ancHMA-LVKIE+ev+AVRblb2	15	0	170202
B	Pikp-1+Pikp-2+AVR-PikD	16	2	170202
B	Pikp-1:ancHMA+Pikp-2+AVR-PikD	16	2	170202
B	Pikp-1:ancHMA+Pikp-2+AVRblb2	16	2	170202
B	Pikp-1:ancHMA+ev+AVRblb2	16	0	170202
B	Pikp-1+Pikp-2+AVRblb2	16	0	170202
B	Pikp-1:ancHMA-LVKIE+Pikp-2+AVR-PikD	16	2	170202
B	Pikp-1:ancHMA-LVKIE+Pikp-2+AVRblb2	16	0	170202
B	Pikp-1:ancHMA-LVKIE+ev+AVRblb2	16	0	170202
B	Pikp-1+Pikp-2+AVR-PikD	17	2	170202
B	Pikp-1:ancHMA+Pikp-2+AVR-PikD	17	2	170202
B	Pikp-1:ancHMA+Pikp-2+AVRblb2	17	2	170202
B	Pikp-1:ancHMA+ev+AVRblb2	17	0	170202
B	Pikp-1+Pikp-2+AVRblb2	17	0	170202
B	Pikp-1:ancHMA-LVKIE+Pikp-2+AVR-PikD	17	2	170202
B	Pikp-1:ancHMA-LVKIE+Pikp-2+AVRblb2	17	2	170202
B	Pikp-1:ancHMA-LVKIE+ev+AVRblb2	17	0	170202
B	Pikp-1+Pikp-2+AVR-PikD	18	2	170202
B	Pikp-1:ancHMA+Pikp-2+AVR-PikD	18	2.5	170202
B	Pikp-1:ancHMA+Pikp-2+AVRblb2	18	2.5	170202
B	Pikp-1:ancHMA+ev+AVRblb2	18	0	170202
B	Pikp-1+Pikp-2+AVRblb2	18	0	170202
B	Pikp-1:ancHMA-LVKIE+Pikp-2+AVR-PikD	18	2.5	170202
B	Pikp-1:ancHMA-LVKIE+Pikp-2+AVRblb2	18	2.5	170202
B	Pikp-1:ancHMA-LVKIE+ev+AVRblb2	18	0	170202
B	Pikp-1+Pikp-2+AVR-PikD	19	2	170202
B	Pikp-1:ancHMA+Pikp-2+AVR-PikD	19	2	170202
B	Pikp-1:ancHMA+Pikp-2+AVRblb2	19	2.5	170202
B	Pikp-1:ancHMA+ev+AVRblb2	19	0	170202
B	Pikp-1+Pikp-2+AVRblb2	19	0	170202
B	Pikp-1:ancHMA-LVKIE+Pikp-2+AVR-PikD	19	2.5	170202
B	Pikp-1:ancHMA-LVKIE+Pikp-2+AVRblb2	19	2.5	170202
B	Pikp-1:ancHMA-LVKIE+ev+AVRblb2	19	0	170202
B	Pikp-1+Pikp-2+AVR-PikD	20	2	170202
B	Pikp-1:ancHMA+Pikp-2+AVR-PikD	20	3	170202
B	Pikp-1:ancHMA+Pikp-2+AVRblb2	20	2	170202
B	Pikp-1:ancHMA+ev+AVRblb2	20	0	170202
B	Pikp-1+Pikp-2+AVRblb2	20	0	170202
B	Pikp-1:ancHMA-LVKIE+Pikp-2+AVR-PikD	20	2	170202
B	Pikp-1:ancHMA-LVKIE+Pikp-2+AVRblb2	20	2	170202
B	Pikp-1:ancHMA-LVKIE+ev+AVRblb2	20	0	170202
B	Pikp-1+Pikp-2+AVR-PikD	21	1	170202
B	Pikp-1:ancHMA+Pikp-2+AVR-PikD	21	1.5	170202
B	Pikp-1:ancHMA+Pikp-2+AVRblb2	21	2	170202
B	Pikp-1:ancHMA+ev+AVRblb2	21	0	170202
B	Pikp-1+Pikp-2+AVRblb2	21	0	170202
B	Pikp-1:ancHMA-LVKIE+Pikp-2+AVR-PikD	21	2	170202
B	Pikp-1:ancHMA-LVKIE+Pikp-2+AVRblb2	21	2	170202
B	Pikp-1:ancHMA-LVKIE+ev+AVRblb2	21	0	170202
B	Pikp-1+Pikp-2+AVR-PikD	22	2	170202
B	Pikp-1:ancHMA+Pikp-2+AVR-PikD	22	1.5	170202
B	Pikp-1:ancHMA+Pikp-2+AVRblb2	22	2	170202
B	Pikp-1:ancHMA+ev+AVRblb2	22	0	170202
B	Pikp-1+Pikp-2+AVRblb2	22	0	170202
B	Pikp-1:ancHMA-LVKIE+Pikp-2+AVR-PikD	22	2	170202
B	Pikp-1:ancHMA-LVKIE+Pikp-2+AVRblb2	22	2	170202
B	Pikp-1:ancHMA-LVKIE+ev+AVRblb2	22	0	170202
B	Pikp-1+Pikp-2+AVR-PikD	23	2.5	170202
B	Pikp-1:ancHMA+Pikp-2+AVR-PikD	23	2	170202
B	Pikp-1:ancHMA+Pikp-2+AVRblb2	23	2.5	170202
B	Pikp-1:ancHMA+ev+AVRblb2	23	0	170202
B	Pikp-1+Pikp-2+AVRblb2	23	0	170202
B	Pikp-1:ancHMA-LVKIE+Pikp-2+AVR-PikD	23	2.5	170202
B	Pikp-1:ancHMA-LVKIE+Pikp-2+AVRblb2	23	2.5	170202
B	Pikp-1:ancHMA-LVKIE+ev+AVRblb2	23	0	170202
B	Pikp-1+Pikp-2+AVR-PikD	24	3	170202
B	Pikp-1:ancHMA+Pikp-2+AVR-PikD	24	3	170202
B	Pikp-1:ancHMA+Pikp-2+AVRblb2	24	3.5	170202
B	Pikp-1:ancHMA+ev+AVRblb2	24	0	170202
B	Pikp-1+Pikp-2+AVRblb2	24	0	170202
B	Pikp-1:ancHMA-LVKIE+Pikp-2+AVR-PikD	24	3.5	170202
B	Pikp-1:ancHMA-LVKIE+Pikp-2+AVRblb2	24	3.5	170202
B	Pikp-1:ancHMA-LVKIE+ev+AVRblb2	24	0	170202
B	Pikp-1+Pikp-2+AVR-PikD	1	2	170209
B	Pikp-1:ancHMA+Pikp-2+AVR-PikD	1	2	170209
B	Pikp-1:ancHMA+Pikp-2+AVRblb2	1	3	170209
B	Pikp-1:ancHMA+ev+AVRblb2	1	0	170209
B	Pikp-1+Pikp-2+AVRblb2	1	0	170209
B	Pikp-1:ancHMA-LVKIE+Pikp-2+AVR-PikD	1	2	170209
B	Pikp-1:ancHMA-LVKIE+Pikp-2+AVRblb2	1	2	170209
B	Pikp-1:ancHMA-LVKIE+ev+AVRblb2	1	0	170209
B	Pikp-1+Pikp-2+AVR-PikD	2	2	170209
B	Pikp-1:ancHMA+Pikp-2+AVR-PikD	2	2	170209
B	Pikp-1:ancHMA+Pikp-2+AVRblb2	2	3	170209
B	Pikp-1:ancHMA+ev+AVRblb2	2	0	170209
B	Pikp-1+Pikp-2+AVRblb2	2	0	170209
B	Pikp-1:ancHMA-LVKIE+Pikp-2+AVR-PikD	2	1.5	170209
B	Pikp-1:ancHMA-LVKIE+Pikp-2+AVRblb2	2	2	170209
B	Pikp-1:ancHMA-LVKIE+ev+AVRblb2	2	0	170209
B	Pikp-1+Pikp-2+AVR-PikD	3	1	170209
B	Pikp-1:ancHMA+Pikp-2+AVR-PikD	3	1	170209
B	Pikp-1:ancHMA+Pikp-2+AVRblb2	3	2	170209
B	Pikp-1:ancHMA+ev+AVRblb2	3	0	170209
B	Pikp-1+Pikp-2+AVRblb2	3	0	170209
B	Pikp-1:ancHMA-LVKIE+Pikp-2+AVR-PikD	3	2	170209
B	Pikp-1:ancHMA-LVKIE+Pikp-2+AVRblb2	3	2	170209
B	Pikp-1:ancHMA-LVKIE+ev+AVRblb2	3	0	170209
B	Pikp-1+Pikp-2+AVR-PikD	4	2	170209
B	Pikp-1:ancHMA+Pikp-2+AVR-PikD	4	1.5	170209
B	Pikp-1:ancHMA+Pikp-2+AVRblb2	4	3	170209
B	Pikp-1:ancHMA+ev+AVRblb2	4	0	170209
B	Pikp-1+Pikp-2+AVRblb2	4	0	170209
B	Pikp-1:ancHMA-LVKIE+Pikp-2+AVR-PikD	4	3	170209
B	Pikp-1:ancHMA-LVKIE+Pikp-2+AVRblb2	4	3	170209
B	Pikp-1:ancHMA-LVKIE+ev+AVRblb2	4	0	170209
B	Pikp-1+Pikp-2+AVR-PikD	5	2	170209
B	Pikp-1:ancHMA+Pikp-2+AVR-PikD	5	2	170209
B	Pikp-1:ancHMA+Pikp-2+AVRblb2	5	3	170209
B	Pikp-1:ancHMA+ev+AVRblb2	5	0	170209
B	Pikp-1+Pikp-2+AVRblb2	5	0	170209
B	Pikp-1:ancHMA-LVKIE+Pikp-2+AVR-PikD	5	2	170209
B	Pikp-1:ancHMA-LVKIE+Pikp-2+AVRblb2	5	2	170209
B	Pikp-1:ancHMA-LVKIE+ev+AVRblb2	5	0	170209
B	Pikp-1+Pikp-2+AVR-PikD	6	2	170209
B	Pikp-1:ancHMA+Pikp-2+AVR-PikD	6	2	170209
B	Pikp-1:ancHMA+Pikp-2+AVRblb2	6	2	170209
B	Pikp-1:ancHMA+ev+AVRblb2	6	0	170209
B	Pikp-1+Pikp-2+AVRblb2	6	0	170209
B	Pikp-1:ancHMA-LVKIE+Pikp-2+AVR-PikD	6	2.5	170209
B	Pikp-1:ancHMA-LVKIE+Pikp-2+AVRblb2	6	2.5	170209
B	Pikp-1:ancHMA-LVKIE+ev+AVRblb2	6	0	170209
B	Pikp-1+Pikp-2+AVR-PikD	7	2	170209
B	Pikp-1:ancHMA+Pikp-2+AVR-PikD	7	2	170209
B	Pikp-1:ancHMA+Pikp-2+AVRblb2	7	2	170209
B	Pikp-1:ancHMA+ev+AVRblb2	7	0	170209
B	Pikp-1+Pikp-2+AVRblb2	7	0	170209
B	Pikp-1:ancHMA-LVKIE+Pikp-2+AVR-PikD	7	2	170209
B	Pikp-1:ancHMA-LVKIE+Pikp-2+AVRblb2	7	2	170209
B	Pikp-1:ancHMA-LVKIE+ev+AVRblb2	7	0	170209
B	Pikp-1+Pikp-2+AVR-PikD	8	1	170209
B	Pikp-1:ancHMA+Pikp-2+AVR-PikD	8	2	170209
B	Pikp-1:ancHMA+Pikp-2+AVRblb2	8	3	170209
B	Pikp-1:ancHMA+ev+AVRblb2	8	0	170209
B	Pikp-1+Pikp-2+AVRblb2	8	0	170209
B	Pikp-1:ancHMA-LVKIE+Pikp-2+AVR-PikD	8	1	170209
B	Pikp-1:ancHMA-LVKIE+Pikp-2+AVRblb2	8	2	170209
B	Pikp-1:ancHMA-LVKIE+ev+AVRblb2	8	0	170209
B	Pikp-1+Pikp-2+AVR-PikD	9	3	170209
B	Pikp-1:ancHMA+Pikp-2+AVR-PikD	9	3	170209
B	Pikp-1:ancHMA+Pikp-2+AVRblb2	9	3	170209
B	Pikp-1:ancHMA+ev+AVRblb2	9	0	170209
B	Pikp-1+Pikp-2+AVRblb2	9	0	170209
B	Pikp-1:ancHMA-LVKIE+Pikp-2+AVR-PikD	9	3	170209
B	Pikp-1:ancHMA-LVKIE+Pikp-2+AVRblb2	9	3	170209
B	Pikp-1:ancHMA-LVKIE+ev+AVRblb2	9	0	170209
B	Pikp-1+Pikp-2+AVR-PikD	10	2	170209
B	Pikp-1:ancHMA+Pikp-2+AVR-PikD	10	2	170209
B	Pikp-1:ancHMA+Pikp-2+AVRblb2	10	3	170209
B	Pikp-1:ancHMA+ev+AVRblb2	10	0	170209
B	Pikp-1+Pikp-2+AVRblb2	10	0	170209
B	Pikp-1:ancHMA-LVKIE+Pikp-2+AVR-PikD	10	3	170209
B	Pikp-1:ancHMA-LVKIE+Pikp-2+AVRblb2	10	3	170209
B	Pikp-1:ancHMA-LVKIE+ev+AVRblb2	10	0	170209
B	Pikp-1+Pikp-2+AVR-PikD	11	2	170209
B	Pikp-1:ancHMA+Pikp-2+AVR-PikD	11	3	170209
B	Pikp-1:ancHMA+Pikp-2+AVRblb2	11	2	170209
B	Pikp-1:ancHMA+ev+AVRblb2	11	0	170209
B	Pikp-1+Pikp-2+AVRblb2	11	0	170209
B	Pikp-1:ancHMA-LVKIE+Pikp-2+AVR-PikD	11	2	170209
B	Pikp-1:ancHMA-LVKIE+Pikp-2+AVRblb2	11	2	170209
B	Pikp-1:ancHMA-LVKIE+ev+AVRblb2	11	0	170209
B	Pikp-1+Pikp-2+AVR-PikD	12	3	170209
B	Pikp-1:ancHMA+Pikp-2+AVR-PikD	12	2.5	170209
B	Pikp-1:ancHMA+Pikp-2+AVRblb2	12	3	170209
B	Pikp-1:ancHMA+ev+AVRblb2	12	0	170209
B	Pikp-1+Pikp-2+AVRblb2	12	0	170209
B	Pikp-1:ancHMA-LVKIE+Pikp-2+AVR-PikD	12	3	170209
B	Pikp-1:ancHMA-LVKIE+Pikp-2+AVRblb2	12	2.5	170209
B	Pikp-1:ancHMA-LVKIE+ev+AVRblb2	12	0	170209
B	Pikp-1+Pikp-2+AVR-PikD	13	2	170209
B	Pikp-1:ancHMA+Pikp-2+AVR-PikD	13	2	170209
B	Pikp-1:ancHMA+Pikp-2+AVRblb2	13	2	170209
B	Pikp-1:ancHMA+ev+AVRblb2	13	0	170209
B	Pikp-1+Pikp-2+AVRblb2	13	0	170209
B	Pikp-1:ancHMA-LVKIE+Pikp-2+AVR-PikD	13	3	170209
B	Pikp-1:ancHMA-LVKIE+Pikp-2+AVRblb2	13	2	170209
B	Pikp-1:ancHMA-LVKIE+ev+AVRblb2	13	0	170209
B	Pikp-1+Pikp-2+AVR-PikD	14	2	170209
B	Pikp-1:ancHMA+Pikp-2+AVR-PikD	14	2	170209
B	Pikp-1:ancHMA+Pikp-2+AVRblb2	14	3	170209
B	Pikp-1:ancHMA+ev+AVRblb2	14	0	170209
B	Pikp-1+Pikp-2+AVRblb2	14	0	170209
B	Pikp-1:ancHMA-LVKIE+Pikp-2+AVR-PikD	14	2	170209
B	Pikp-1:ancHMA-LVKIE+Pikp-2+AVRblb2	14	2	170209
B	Pikp-1:ancHMA-LVKIE+ev+AVRblb2	14	0	170209
B	Pikp-1+Pikp-2+AVR-PikD	15	2	170209
B	Pikp-1:ancHMA+Pikp-2+AVR-PikD	15	2	170209
B	Pikp-1:ancHMA+Pikp-2+AVRblb2	15	3	170209
B	Pikp-1:ancHMA+ev+AVRblb2	15	0	170209
B	Pikp-1+Pikp-2+AVRblb2	15	0	170209
B	Pikp-1:ancHMA-LVKIE+Pikp-2+AVR-PikD	15	3	170209
B	Pikp-1:ancHMA-LVKIE+Pikp-2+AVRblb2	15	3	170209
B	Pikp-1:ancHMA-LVKIE+ev+AVRblb2	15	0	170209
B	Pikp-1+Pikp-2+AVR-PikD	16	2.5	170209
B	Pikp-1:ancHMA+Pikp-2+AVR-PikD	16	2.5	170209
B	Pikp-1:ancHMA+Pikp-2+AVRblb2	16	3	170209
B	Pikp-1:ancHMA+ev+AVRblb2	16	0	170209
B	Pikp-1+Pikp-2+AVRblb2	16	0	170209
B	Pikp-1:ancHMA-LVKIE+Pikp-2+AVR-PikD	16	3	170209
B	Pikp-1:ancHMA-LVKIE+Pikp-2+AVRblb2	16	3	170209
B	Pikp-1:ancHMA-LVKIE+ev+AVRblb2	16	0	170209
B	Pikp-1+Pikp-2+AVR-PikD	17	2	170209
B	Pikp-1:ancHMA+Pikp-2+AVR-PikD	17	2	170209
B	Pikp-1:ancHMA+Pikp-2+AVRblb2	17	2	170209
B	Pikp-1:ancHMA+ev+AVRblb2	17	0	170209
B	Pikp-1+Pikp-2+AVRblb2	17	0	170209
B	Pikp-1:ancHMA-LVKIE+Pikp-2+AVR-PikD	17	2	170209
B	Pikp-1:ancHMA-LVKIE+Pikp-2+AVRblb2	17	2.5	170209
B	Pikp-1:ancHMA-LVKIE+ev+AVRblb2	17	0	170209
B	Pikp-1+Pikp-2+AVR-PikD	18	2	170209
B	Pikp-1:ancHMA+Pikp-2+AVR-PikD	18	2	170209
B	Pikp-1:ancHMA+Pikp-2+AVRblb2	18	2	170209
B	Pikp-1:ancHMA+ev+AVRblb2	18	0	170209
B	Pikp-1+Pikp-2+AVRblb2	18	0	170209
B	Pikp-1:ancHMA-LVKIE+Pikp-2+AVR-PikD	18	2	170209
B	Pikp-1:ancHMA-LVKIE+Pikp-2+AVRblb2	18	2	170209
B	Pikp-1:ancHMA-LVKIE+ev+AVRblb2	18	0	170209
B	Pikp-1+Pikp-2+AVR-PikD	19	2.5	170209
B	Pikp-1:ancHMA+Pikp-2+AVR-PikD	19	2.5	170209
B	Pikp-1:ancHMA+Pikp-2+AVRblb2	19	3	170209
B	Pikp-1:ancHMA+ev+AVRblb2	19	0	170209
B	Pikp-1+Pikp-2+AVRblb2	19	0	170209
B	Pikp-1:ancHMA-LVKIE+Pikp-2+AVR-PikD	19	2.5	170209
B	Pikp-1:ancHMA-LVKIE+Pikp-2+AVRblb2	19	2.5	170209
B	Pikp-1:ancHMA-LVKIE+ev+AVRblb2	19	0	170209
B	Pikp-1+Pikp-2+AVR-PikD	20	2	170209
B	Pikp-1:ancHMA+Pikp-2+AVR-PikD	20	2.5	170209
B	Pikp-1:ancHMA+Pikp-2+AVRblb2	20	3	170209
B	Pikp-1:ancHMA+ev+AVRblb2	20	0	170209
B	Pikp-1+Pikp-2+AVRblb2	20	0	170209
B	Pikp-1:ancHMA-LVKIE+Pikp-2+AVR-PikD	20	3	170209
B	Pikp-1:ancHMA-LVKIE+Pikp-2+AVRblb2	20	3	170209
B	Pikp-1:ancHMA-LVKIE+ev+AVRblb2	20	0	170209
B	Pikp-1+Pikp-2+AVR-PikD	21	3	170209
B	Pikp-1:ancHMA+Pikp-2+AVR-PikD	21	3	170209
B	Pikp-1:ancHMA+Pikp-2+AVRblb2	21	3	170209
B	Pikp-1:ancHMA+ev+AVRblb2	21	0	170209
B	Pikp-1+Pikp-2+AVRblb2	21	0	170209
B	Pikp-1:ancHMA-LVKIE+Pikp-2+AVR-PikD	21	3	170209
B	Pikp-1:ancHMA-LVKIE+Pikp-2+AVRblb2	21	3	170209
B	Pikp-1:ancHMA-LVKIE+ev+AVRblb2	21	0	170209
B	Pikp-1+Pikp-2+AVR-PikD	22	2.5	170209
B	Pikp-1:ancHMA+Pikp-2+AVR-PikD	22	2.5	170209
B	Pikp-1:ancHMA+Pikp-2+AVRblb2	22	2.5	170209
B	Pikp-1:ancHMA+ev+AVRblb2	22	0	170209
B	Pikp-1+Pikp-2+AVRblb2	22	0	170209
B	Pikp-1:ancHMA-LVKIE+Pikp-2+AVR-PikD	22	2	170209
B	Pikp-1:ancHMA-LVKIE+Pikp-2+AVRblb2	22	2.5	170209
B	Pikp-1:ancHMA-LVKIE+ev+AVRblb2	22	0	170209
B	Pikp-1+Pikp-2+AVR-PikD	23	3	170209
B	Pikp-1:ancHMA+Pikp-2+AVR-PikD	23	3	170209
B	Pikp-1:ancHMA+Pikp-2+AVRblb2	23	3	170209
B	Pikp-1:ancHMA+ev+AVRblb2	23	0	170209
B	Pikp-1+Pikp-2+AVRblb2	23	0	170209
B	Pikp-1:ancHMA-LVKIE+Pikp-2+AVR-PikD	23	3	170209
B	Pikp-1:ancHMA-LVKIE+Pikp-2+AVRblb2	23	3.5	170209
B	Pikp-1:ancHMA-LVKIE+ev+AVRblb2	23	0	170209
B	Pikp-1+Pikp-2+AVR-PikD	24	2.5	170209
B	Pikp-1:ancHMA+Pikp-2+AVR-PikD	24	2.5	170209
B	Pikp-1:ancHMA+Pikp-2+AVRblb2	24	3	170209
B	Pikp-1:ancHMA+ev+AVRblb2	24	0	170209
B	Pikp-1+Pikp-2+AVRblb2	24	0	170209
B	Pikp-1:ancHMA-LVKIE+Pikp-2+AVR-PikD	24	2	170209
B	Pikp-1:ancHMA-LVKIE+Pikp-2+AVRblb2	24	2	170209
B	Pikp-1:ancHMA-LVKIE+ev+AVRblb2	24	0	170209
B	Pikp-1+Pikp-2+AVR-PikD	1	2	181130
B	Pikp-1:ancHMA-LVKIE+Pikp-2+AVR-PikD	1	2	181130
B	1:ancHMA-LVKIE+Pikp-2+AVRblb2	1	2	181130
B	1:ancHMA-LVKIE+ev+AVRblb2	1	2	181130
B	Pikp-1+Pikp-2+AVRblb2	1	2	181130
B	Pikp-1+Pikp-2+AVR-PikD	2	2.5	181130
B	Pikp-1:ancHMA-LVKIE+Pikp-2+AVR-PikD	2	3	181130
B	1:ancHMA-LVKIE+Pikp-2+AVRblb2	2	3	181130
B	1:ancHMA-LVKIE+ev+AVRblb2	2	0	181130
B	Pikp-1+Pikp-2+AVRblb2	2	1	181130
B	Pikp-1+Pikp-2+AVR-PikD	3	3.5	181130
B	Pikp-1:ancHMA-LVKIE+Pikp-2+AVR-PikD	3	3.5	181130
B	1:ancHMA-LVKIE+Pikp-2+AVRblb2	3	3.5	181130
B	1:ancHMA-LVKIE+ev+AVRblb2	3	0	181130
B	Pikp-1+Pikp-2+AVRblb2	3	1	181130
B	Pikp-1+Pikp-2+AVR-PikD	4	2	181130
B	Pikp-1:ancHMA-LVKIE+Pikp-2+AVR-PikD	4	2	181130
B	1:ancHMA-LVKIE+Pikp-2+AVRblb2	4	2	181130
B	1:ancHMA-LVKIE+ev+AVRblb2	4	0	181130
B	Pikp-1+Pikp-2+AVRblb2	4	0	181130
B	Pikp-1+Pikp-2+AVR-PikD	5	2	181130
B	Pikp-1:ancHMA-LVKIE+Pikp-2+AVR-PikD	5	2	181130
B	1:ancHMA-LVKIE+Pikp-2+AVRblb2	5	2	181130
B	1:ancHMA-LVKIE+ev+AVRblb2	5	0	181130
B	Pikp-1+Pikp-2+AVRblb2	5	1	181130
B	Pikp-1+Pikp-2+AVR-PikD	6	2	181130
B	Pikp-1:ancHMA-LVKIE+Pikp-2+AVR-PikD	6	2	181130
B	1:ancHMA-LVKIE+Pikp-2+AVRblb2	6	2	181130
B	1:ancHMA-LVKIE+ev+AVRblb2	6	0	181130
B	Pikp-1+Pikp-2+AVRblb2	6	0.5	181130
B	Pikp-1+Pikp-2+AVR-PikD	7	3	181130
B	Pikp-1:ancHMA-LVKIE+Pikp-2+AVR-PikD	7	3	181130
B	1:ancHMA-LVKIE+Pikp-2+AVRblb2	7	4	181130
B	1:ancHMA-LVKIE+ev+AVRblb2	7	0	181130
B	Pikp-1+Pikp-2+AVRblb2	7	0	181130
B	Pikp-1+Pikp-2+AVR-PikD	8	2	181130
B	Pikp-1:ancHMA-LVKIE+Pikp-2+AVR-PikD	8	2.5	181130
B	1:ancHMA-LVKIE+Pikp-2+AVRblb2	8	2.5	181130
B	1:ancHMA-LVKIE+ev+AVRblb2	8	2.5	181130
B	Pikp-1+Pikp-2+AVRblb2	8	0	181130
B	Pikp-1+Pikp-2+AVR-PikD	9	2.5	181130
B	Pikp-1:ancHMA-LVKIE+Pikp-2+AVR-PikD	9	3	181130
B	1:ancHMA-LVKIE+Pikp-2+AVRblb2	9	3	181130
B	1:ancHMA-LVKIE+ev+AVRblb2	9	0	181130
B	Pikp-1+Pikp-2+AVRblb2	9	0.5	181130
B	Pikp-1+Pikp-2+AVR-PikD	10	2	181130
B	Pikp-1:ancHMA-LVKIE+Pikp-2+AVR-PikD	10	2	181130
B	1:ancHMA-LVKIE+Pikp-2+AVRblb2	10	3	181130
B	1:ancHMA-LVKIE+ev+AVRblb2	10	0	181130
B	Pikp-1+Pikp-2+AVRblb2	10	1	181130
B	Pikp-1+Pikp-2+AVR-PikD	11	2.5	181130
B	Pikp-1:ancHMA-LVKIE+Pikp-2+AVR-PikD	11	2.5	181130
B	1:ancHMA-LVKIE+Pikp-2+AVRblb2	11	2	181130
B	1:ancHMA-LVKIE+ev+AVRblb2	11	0	181130
B	Pikp-1+Pikp-2+AVRblb2	11	1	181130
B	Pikp-1+Pikp-2+AVR-PikD	12	2	181130
B	Pikp-1:ancHMA-LVKIE+Pikp-2+AVR-PikD	12	3	181130
B	1:ancHMA-LVKIE+Pikp-2+AVRblb2	12	3	181130
B	1:ancHMA-LVKIE+ev+AVRblb2	12	0	181130
B	Pikp-1+Pikp-2+AVRblb2	12	0	181130
B	Pikp-1+Pikp-2+AVR-PikD	13	1	181130
B	Pikp-1:ancHMA-LVKIE+Pikp-2+AVR-PikD	13	3.5	181130
B	1:ancHMA-LVKIE+Pikp-2+AVRblb2	13	3.5	181130
B	1:ancHMA-LVKIE+ev+AVRblb2	13	1	181130
B	Pikp-1+Pikp-2+AVRblb2	13	1	181130
B	Pikp-1+Pikp-2+AVR-PikD	14	3	181130
B	Pikp-1:ancHMA-LVKIE+Pikp-2+AVR-PikD	14	3	181130
B	1:ancHMA-LVKIE+Pikp-2+AVRblb2	14	3.5	181130
B	1:ancHMA-LVKIE+ev+AVRblb2	14	0	181130
B	Pikp-1+Pikp-2+AVRblb2	14	0.5	181130
B	Pikp-1+Pikp-2+AVR-PikD	15	2	181130
B	Pikp-1:ancHMA-LVKIE+Pikp-2+AVR-PikD	15	2	181130
B	1:ancHMA-LVKIE+Pikp-2+AVRblb2	15	2	181130
B	1:ancHMA-LVKIE+ev+AVRblb2	15	0	181130
B	Pikp-1+Pikp-2+AVRblb2	15	1	181130
B	Pikp-1+Pikp-2+AVR-PikD	16	2	181130
B	Pikp-1:ancHMA-LVKIE+Pikp-2+AVR-PikD	16	3	181130
B	1:ancHMA-LVKIE+Pikp-2+AVRblb2	16	3	181130
B	1:ancHMA-LVKIE+ev+AVRblb2	16	0	181130
B	Pikp-1+Pikp-2+AVRblb2	16	1	181130
B	Pikp-1+Pikp-2+AVR-PikD	17	2.5	181130
B	Pikp-1:ancHMA-LVKIE+Pikp-2+AVR-PikD	17	2.5	181130
B	1:ancHMA-LVKIE+Pikp-2+AVRblb2	17	2	181130
B	1:ancHMA-LVKIE+ev+AVRblb2	17	0	181130
B	Pikp-1+Pikp-2+AVRblb2	17	1	181130
B	Pikp-1+Pikp-2+AVR-PikD	18	2	181130
B	Pikp-1:ancHMA-LVKIE+Pikp-2+AVR-PikD	18	3	181130
B	1:ancHMA-LVKIE+Pikp-2+AVRblb2	18	3	181130
B	1:ancHMA-LVKIE+ev+AVRblb2	18	0	181130
B	Pikp-1+Pikp-2+AVRblb2	18	1.5	181130
B	Pikp-1+Pikp-2+AVR-PikD	19	1	181130
B	Pikp-1:ancHMA-LVKIE+Pikp-2+AVR-PikD	19	0.5	181130
B	1:ancHMA-LVKIE+Pikp-2+AVRblb2	19	0.5	181130
B	1:ancHMA-LVKIE+ev+AVRblb2	19	0	181130
B	Pikp-1+Pikp-2+AVRblb2	19	1	181130
B	Pikp-1+Pikp-2+AVR-PikD	20	3	181130
B	Pikp-1:ancHMA-LVKIE+Pikp-2+AVR-PikD	20	3	181130
B	1:ancHMA-LVKIE+Pikp-2+AVRblb2	20	3	181130
B	1:ancHMA-LVKIE+ev+AVRblb2	20	0	181130
B	Pikp-1+Pikp-2+AVRblb2	20	2	181130
B	Pikp-1+Pikp-2+AVR-PikD	21	3	181130
B	Pikp-1:ancHMA-LVKIE+Pikp-2+AVR-PikD	21	4	181130
B	1:ancHMA-LVKIE+Pikp-2+AVRblb2	21	4	181130
B	1:ancHMA-LVKIE+ev+AVRblb2	21	0	181130
B	Pikp-1+Pikp-2+AVRblb2	21	2.5	181130
B	Pikp-1+Pikp-2+AVR-PikD	22	3.5	181130
B	Pikp-1:ancHMA-LVKIE+Pikp-2+AVR-PikD	22	4	181130
B	1:ancHMA-LVKIE+Pikp-2+AVRblb2	22	4	181130
B	1:ancHMA-LVKIE+ev+AVRblb2	22	1.5	181130
B	Pikp-1+Pikp-2+AVRblb2	22	1.5	181130
B	Pikp-1+Pikp-2+AVR-PikD	23	3	181130
B	Pikp-1:ancHMA-LVKIE+Pikp-2+AVR-PikD	23	4	181130
B	1:ancHMA-LVKIE+Pikp-2+AVRblb2	23	4	181130
B	1:ancHMA-LVKIE+ev+AVRblb2	23	0.5	181130
B	Pikp-1+Pikp-2+AVRblb2	23	0.5	181130

## Sheet: ancHMA-LY
setup	condition	leaf	score	replicate
A	Pikp-1+Pikp-2+AVR-PikD	1	3	161019		Replicate: each replicate has a unique 6 digit identifier
A	Pikp-1:ancHMA+Pikp-2+AVR-PikD	1	3	161019		ev: empty vector
A	Pikp-1:ancHMA+Pikp-2+AVRblb2	1	3	161019
A	Pikp-1:ancHMA+ev+AVRblb2	1	0	161019
A	Pikp-1+Pikp-2+AVRblb2	1	0.5	161019
A	Pikp-1:ancHMA-LY+Pikp-2+AVR-PikD	1	2	161019
A	Pikp-1:ancHMA-LY+Pikp-2+AVRblb2	1	2	161019
A	Pikp-1:ancHMA-LY+ev+AVRblb2	1	0	161019
A	Pikp-1+Pikp-2+AVR-PikD	2	3	161019
A	Pikp-1:ancHMA+Pikp-2+AVR-PikD	2	2	161019
A	Pikp-1:ancHMA+Pikp-2+AVRblb2	2	2	161019
A	Pikp-1:ancHMA+ev+AVRblb2	2	0	161019
A	Pikp-1+Pikp-2+AVRblb2	2	0	161019
A	Pikp-1:ancHMA-LY+Pikp-2+AVR-PikD	2	2	161019
A	Pikp-1:ancHMA-LY+Pikp-2+AVRblb2	2	2	161019
A	Pikp-1:ancHMA-LY+ev+AVRblb2	2	0	161019
A	Pikp-1+Pikp-2+AVR-PikD	3	2	161019
A	Pikp-1:ancHMA+Pikp-2+AVR-PikD	3	3	161019
A	Pikp-1:ancHMA+Pikp-2+AVRblb2	3	3	161019
A	Pikp-1:ancHMA+ev+AVRblb2	3	0	161019
A	Pikp-1+Pikp-2+AVRblb2	3	0	161019
A	Pikp-1:ancHMA-LY+Pikp-2+AVR-PikD	3	2	161019
A	Pikp-1:ancHMA-LY+Pikp-2+AVRblb2	3	2	161019
A	Pikp-1:ancHMA-LY+ev+AVRblb2	3	0	161019
A	Pikp-1+Pikp-2+AVR-PikD	4	3	161019
A	Pikp-1:ancHMA+Pikp-2+AVR-PikD	4	3	161019
A	Pikp-1:ancHMA+Pikp-2+AVRblb2	4	2	161019
A	Pikp-1:ancHMA+ev+AVRblb2	4	0	161019
A	Pikp-1+Pikp-2+AVRblb2	4	0	161019
A	Pikp-1:ancHMA-LY+Pikp-2+AVR-PikD	4	2	161019
A	Pikp-1:ancHMA-LY+Pikp-2+AVRblb2	4	2	161019
A	Pikp-1:ancHMA-LY+ev+AVRblb2	4	0	161019
A	Pikp-1+Pikp-2+AVR-PikD	5	3	161019
A	Pikp-1:ancHMA+Pikp-2+AVR-PikD	5	3	161019
A	Pikp-1:ancHMA+Pikp-2+AVRblb2	5	3	161019
A	Pikp-1:ancHMA+ev+AVRblb2	5	0	161019
A	Pikp-1+Pikp-2+AVRblb2	5	0	161019
A	Pikp-1:ancHMA-LY+Pikp-2+AVR-PikD	5	2	161019
A	Pikp-1:ancHMA-LY+Pikp-2+AVRblb2	5	2	161019
A	Pikp-1:ancHMA-LY+ev+AVRblb2	5	0	161019
A	Pikp-1+Pikp-2+AVR-PikD	6	2	161019
A	Pikp-1:ancHMA+Pikp-2+AVR-PikD	6	3	161019
A	Pikp-1:ancHMA+Pikp-2+AVRblb2	6	3	161019
A	Pikp-1:ancHMA+ev+AVRblb2	6	0	161019
A	Pikp-1+Pikp-2+AVRblb2	6	0	161019
A	Pikp-1:ancHMA-LY+Pikp-2+AVR-PikD	6	2	161019
A	Pikp-1:ancHMA-LY+Pikp-2+AVRblb2	6	3	161019
A	Pikp-1:ancHMA-LY+ev+AVRblb2	6	0	161019
A	Pikp-1+Pikp-2+AVR-PikD	7	4	161019
A	Pikp-1:ancHMA+Pikp-2+AVR-PikD	7	3	161019
A	Pikp-1:ancHMA+Pikp-2+AVRblb2	7	3	161019
A	Pikp-1:ancHMA+ev+AVRblb2	7	0	161019
A	Pikp-1+Pikp-2+AVRblb2	7	0	161019
A	Pikp-1:ancHMA-LY+Pikp-2+AVR-PikD	7	3	161019
A	Pikp-1:ancHMA-LY+Pikp-2+AVRblb2	7	3	161019
A	Pikp-1:ancHMA-LY+ev+AVRblb2	7	0	161019
A	Pikp-1+Pikp-2+AVR-PikD	8	2	161019
A	Pikp-1:ancHMA+Pikp-2+AVR-PikD	8	2	161019
A	Pikp-1:ancHMA+Pikp-2+AVRblb2	8	3	161019
A	Pikp-1:ancHMA+ev+AVRblb2	8	0	161019
A	Pikp-1+Pikp-2+AVRblb2	8	0	161019
A	Pikp-1:ancHMA-LY+Pikp-2+AVR-PikD	8	2	161019
A	Pikp-1:ancHMA-LY+Pikp-2+AVRblb2	8	3	161019
A	Pikp-1:ancHMA-LY+ev+AVRblb2	8	0	161019
A	Pikp-1+Pikp-2+AVR-PikD	9	1	161019
A	Pikp-1:ancHMA+Pikp-2+AVR-PikD	9	1	161019
A	Pikp-1:ancHMA+Pikp-2+AVRblb2	9	1	161019
A	Pikp-1:ancHMA+ev+AVRblb2	9	0	161019
A	Pikp-1+Pikp-2+AVRblb2	9	0	161019
A	Pikp-1:ancHMA-LY+Pikp-2+AVR-PikD	9	1	161019
A	Pikp-1:ancHMA-LY+Pikp-2+AVRblb2	9	1	161019
A	Pikp-1:ancHMA-LY+ev+AVRblb2	9	0	161019
A	Pikp-1+Pikp-2+AVR-PikD	10	3	161019
A	Pikp-1:ancHMA+Pikp-2+AVR-PikD	10	3	161019
A	Pikp-1:ancHMA+Pikp-2+AVRblb2	10	0.5	161019
A	Pikp-1:ancHMA+ev+AVRblb2	10	0	161019
A	Pikp-1+Pikp-2+AVRblb2	10	0	161019
A	Pikp-1:ancHMA-LY+Pikp-2+AVR-PikD	10	1.5	161019
A	Pikp-1:ancHMA-LY+Pikp-2+AVRblb2	10	2	161019
A	Pikp-1:ancHMA-LY+ev+AVRblb2	10	0	161019
A	Pikp-1+Pikp-2+AVR-PikD	11	3	161019
A	Pikp-1:ancHMA+Pikp-2+AVR-PikD	11	3	161019
A	Pikp-1:ancHMA+Pikp-2+AVRblb2	11	3.5	161019
A	Pikp-1:ancHMA+ev+AVRblb2	11	0	161019
A	Pikp-1+Pikp-2+AVRblb2	11	0	161019
A	Pikp-1:ancHMA-LY+Pikp-2+AVR-PikD	11	1	161019
A	Pikp-1:ancHMA-LY+Pikp-2+AVRblb2	11	1	161019
A	Pikp-1:ancHMA-LY+ev+AVRblb2	11	0	161019
A	Pikp-1+Pikp-2+AVR-PikD	12	3	161019
A	Pikp-1:ancHMA+Pikp-2+AVR-PikD	12	3	161019
A	Pikp-1:ancHMA+Pikp-2+AVRblb2	12	3	161019
A	Pikp-1:ancHMA+ev+AVRblb2	12	0	161019
A	Pikp-1+Pikp-2+AVRblb2	12	0	161019
A	Pikp-1:ancHMA-LY+Pikp-2+AVR-PikD	12	2	161019
A	Pikp-1:ancHMA-LY+Pikp-2+AVRblb2	12	3	161019
A	Pikp-1:ancHMA-LY+ev+AVRblb2	12	0	161019
A	Pikp-1+Pikp-2+AVR-PikD	13	2	161019
A	Pikp-1:ancHMA+Pikp-2+AVR-PikD	13	2	161019
A	Pikp-1:ancHMA+Pikp-2+AVRblb2	13	2	161019
A	Pikp-1:ancHMA+ev+AVRblb2	13	0	161019
A	Pikp-1+Pikp-2+AVRblb2	13	0	161019
A	Pikp-1:ancHMA-LY+Pikp-2+AVR-PikD	13	2	161019
A	Pikp-1:ancHMA-LY+Pikp-2+AVRblb2	13	2	161019
A	Pikp-1:ancHMA-LY+ev+AVRblb2	13	0	161019
A	Pikp-1+Pikp-2+AVR-PikD	14	3	161019
A	Pikp-1:ancHMA+Pikp-2+AVR-PikD	14	2	161019
A	Pikp-1:ancHMA+Pikp-2+AVRblb2	14	3.5	161019
A	Pikp-1:ancHMA+ev+AVRblb2	14	0	161019
A	Pikp-1+Pikp-2+AVRblb2	14	0	161019
A	Pikp-1:ancHMA-LY+Pikp-2+AVR-PikD	14	2	161019
A	Pikp-1:ancHMA-LY+Pikp-2+AVRblb2	14	2	161019
A	Pikp-1:ancHMA-LY+ev+AVRblb2	14	0	161019
A	Pikp-1+Pikp-2+AVR-PikD	15	3	161019
A	Pikp-1:ancHMA+Pikp-2+AVR-PikD	15	3	161019
A	Pikp-1:ancHMA+Pikp-2+AVRblb2	15	3.5	161019
A	Pikp-1:ancHMA+ev+AVRblb2	15	0	161019
A	Pikp-1+Pikp-2+AVRblb2	15	0	161019
A	Pikp-1:ancHMA-LY+Pikp-2+AVR-PikD	15	2	161019
A	Pikp-1:ancHMA-LY+Pikp-2+AVRblb2	15	3	161019
A	Pikp-1:ancHMA-LY+ev+AVRblb2	15	0	161019
A	Pikp-1+Pikp-2+AVR-PikD	16	2	161019
A	Pikp-1:ancHMA+Pikp-2+AVR-PikD	16	2	161019
A	Pikp-1:ancHMA+Pikp-2+AVRblb2	16	3	161019
A	Pikp-1:ancHMA+ev+AVRblb2	16	0	161019
A	Pikp-1+Pikp-2+AVRblb2	16	0	161019
A	Pikp-1:ancHMA-LY+Pikp-2+AVR-PikD	16	2	161019
A	Pikp-1:ancHMA-LY+Pikp-2+AVRblb2	16	3	161019
A	Pikp-1:ancHMA-LY+ev+AVRblb2	16	0	161019
A	Pikp-1+Pikp-2+AVR-PikD	17	2	161019
A	Pikp-1:ancHMA+Pikp-2+AVR-PikD	17	3	161019
A	Pikp-1:ancHMA+Pikp-2+AVRblb2	17	3	161019
A	Pikp-1:ancHMA+ev+AVRblb2	17	0	161019
A	Pikp-1+Pikp-2+AVRblb2	17	0	161019
A	Pikp-1:ancHMA-LY+Pikp-2+AVR-PikD	17	1	161019
A	Pikp-1:ancHMA-LY+Pikp-2+AVRblb2	17	2	161019
A	Pikp-1:ancHMA-LY+ev+AVRblb2	17	0	161019
A	Pikp-1+Pikp-2+AVR-PikD	18	2	161019
A	Pikp-1:ancHMA+Pikp-2+AVR-PikD	18	2	161019
A	Pikp-1:ancHMA+Pikp-2+AVRblb2	18	3	161019
A	Pikp-1:ancHMA+ev+AVRblb2	18	0	161019
A	Pikp-1+Pikp-2+AVRblb2	18	0	161019
A	Pikp-1:ancHMA-LY+Pikp-2+AVR-PikD	18	2	161019
A	Pikp-1:ancHMA-LY+Pikp-2+AVRblb2	18	2	161019
A	Pikp-1:ancHMA-LY+ev+AVRblb2	18	0	161019
A	Pikp-1+Pikp-2+AVR-PikD	19	3	161019
A	Pikp-1:ancHMA+Pikp-2+AVR-PikD	19	2	161019
A	Pikp-1:ancHMA+Pikp-2+AVRblb2	19	3.5	161019
A	Pikp-1:ancHMA+ev+AVRblb2	19	0	161019
A	Pikp-1+Pikp-2+AVRblb2	19	0	161019
A	Pikp-1:ancHMA-LY+Pikp-2+AVR-PikD	19	2	161019
A	Pikp-1:ancHMA-LY+Pikp-2+AVRblb2	19	2	161019
A	Pikp-1:ancHMA-LY+ev+AVRblb2	19	0	161019
A	Pikp-1+Pikp-2+AVR-PikD	20	2	161019
A	Pikp-1:ancHMA+Pikp-2+AVR-PikD	20	2	161019
A	Pikp-1:ancHMA+Pikp-2+AVRblb2	20	2	161019
A	Pikp-1:ancHMA+ev+AVRblb2	20	0	161019
A	Pikp-1+Pikp-2+AVRblb2	20	0	161019
A	Pikp-1:ancHMA-LY+Pikp-2+AVR-PikD	20	2	161019
A	Pikp-1:ancHMA-LY+Pikp-2+AVRblb2	20	2	161019
A	Pikp-1:ancHMA-LY+ev+AVRblb2	20	0	161019
A	Pikp-1+Pikp-2+AVR-PikD	21	3	161019
A	Pikp-1:ancHMA+Pikp-2+AVR-PikD	21	3	161019
A	Pikp-1:ancHMA+Pikp-2+AVRblb2	21	3	161019
A	Pikp-1:ancHMA+ev+AVRblb2	21	0	161019
A	Pikp-1+Pikp-2+AVRblb2	21	0	161019
A	Pikp-1:ancHMA-LY+Pikp-2+AVR-PikD	21	2	161019
A	Pikp-1:ancHMA-LY+Pikp-2+AVRblb2	21	3	161019
A	Pikp-1:ancHMA-LY+ev+AVRblb2	21	0	161019
A	Pikp-1+Pikp-2+AVR-PikD	22	2	161019
A	Pikp-1:ancHMA+Pikp-2+AVR-PikD	22	2	161019
A	Pikp-1:ancHMA+Pikp-2+AVRblb2	22	2.5	161019
A	Pikp-1:ancHMA+ev+AVRblb2	22	0	161019
A	Pikp-1+Pikp-2+AVRblb2	22	0	161019
A	Pikp-1:ancHMA-LY+Pikp-2+AVR-PikD	22	2	161019
A	Pikp-1:ancHMA-LY+Pikp-2+AVRblb2	22	2	161019
A	Pikp-1:ancHMA-LY+ev+AVRblb2	22	0	161019
A	Pikp-1+Pikp-2+AVR-PikD	23	3	161019
A	Pikp-1:ancHMA+Pikp-2+AVR-PikD	23	3	161019
A	Pikp-1:ancHMA+Pikp-2+AVRblb2	23	3	161019
A	Pikp-1:ancHMA+ev+AVRblb2	23	0	161019
A	Pikp-1+Pikp-2+AVRblb2	23	0	161019
A	Pikp-1:ancHMA-LY+Pikp-2+AVR-PikD	23	1	161019
A	Pikp-1:ancHMA-LY+Pikp-2+AVRblb2	23	1	161019
A	Pikp-1:ancHMA-LY+ev+AVRblb2	23	0	161019
A	Pikp-1+Pikp-2+AVR-PikD	24	3	161019
A	Pikp-1:ancHMA+Pikp-2+AVR-PikD	24	3	161019
A	Pikp-1:ancHMA+Pikp-2+AVRblb2	24	2	161019
A	Pikp-1:ancHMA+ev+AVRblb2	24	0	161019
A	Pikp-1+Pikp-2+AVRblb2	24	0	161019
A	Pikp-1:ancHMA-LY+Pikp-2+AVR-PikD	24	1	161019
A	Pikp-1:ancHMA-LY+Pikp-2+AVRblb2	24	1	161019
A	Pikp-1:ancHMA-LY+ev+AVRblb2	24	0	161019
B	Pikp-1+Pikp-2+AVRblb2	1	0	170317
B	Pikp-1:ancHMA+Pikp-2+AVR-PikD	1	3.5	170317
B	Pikp-1:ancHMA+Pikp-2+AVRblb2	1	3.5	170317
B	Pikp-1:ancHMA+ev+AVRblb2	1	0	170317
B	Pikp-1+Pikp-2+AVR-PikD	1	2	170317
B	Pikp-1:ancHMA-LY+Pikp-2+AVR-PikD	1	2	170317
B	Pikp-1:ancHMA-LY+Pikp-2+AVRblb2	1	3	170317
B	Pikp-1:ancHMA-LY+ev+AVRblb2	1	0	170317
B	Pikp-1+Pikp-2+AVRblb2	2	0	170317
B	Pikp-1:ancHMA+Pikp-2+AVR-PikD	2	3.5	170317
B	Pikp-1:ancHMA+Pikp-2+AVRblb2	2	3.5	170317
B	Pikp-1:ancHMA+ev+AVRblb2	2	0	170317
B	Pikp-1+Pikp-2+AVR-PikD	2	0	170317
B	Pikp-1:ancHMA-LY+Pikp-2+AVR-PikD	2	1.5	170317
B	Pikp-1:ancHMA-LY+Pikp-2+AVRblb2	2	1.5	170317
B	Pikp-1:ancHMA-LY+ev+AVRblb2	2	0	170317
B	Pikp-1+Pikp-2+AVRblb2	3	0	170317
B	Pikp-1:ancHMA+Pikp-2+AVR-PikD	3	3	170317
B	Pikp-1:ancHMA+Pikp-2+AVRblb2	3	3.5	170317
B	Pikp-1:ancHMA+ev+AVRblb2	3	0	170317
B	Pikp-1+Pikp-2+AVR-PikD	3	0	170317
B	Pikp-1:ancHMA-LY+Pikp-2+AVR-PikD	3	2	170317
B	Pikp-1:ancHMA-LY+Pikp-2+AVRblb2	3	3	170317
B	Pikp-1:ancHMA-LY+ev+AVRblb2	3	0	170317
B	Pikp-1+Pikp-2+AVRblb2	4	0	170317
B	Pikp-1:ancHMA+Pikp-2+AVR-PikD	4	3.5	170317
B	Pikp-1:ancHMA+Pikp-2+AVRblb2	4	3	170317
B	Pikp-1:ancHMA+ev+AVRblb2	4	1	170317
B	Pikp-1+Pikp-2+AVR-PikD	4	0	170317
B	Pikp-1:ancHMA-LY+Pikp-2+AVR-PikD	4	2	170317
B	Pikp-1:ancHMA-LY+Pikp-2+AVRblb2	4	2	170317
B	Pikp-1:ancHMA-LY+ev+AVRblb2	4	0	170317
B	Pikp-1+Pikp-2+AVRblb2	5	0	170317
B	Pikp-1:ancHMA+Pikp-2+AVR-PikD	5	0	170317
B	Pikp-1:ancHMA+Pikp-2+AVRblb2	5	0	170317
B	Pikp-1:ancHMA+ev+AVRblb2	5	0	170317
B	Pikp-1+Pikp-2+AVR-PikD	5	0	170317
B	Pikp-1:ancHMA-LY+Pikp-2+AVR-PikD	5	0	170317
B	Pikp-1:ancHMA-LY+Pikp-2+AVRblb2	5	0	170317
B	Pikp-1:ancHMA-LY+ev+AVRblb2	5	0	170317
B	Pikp-1+Pikp-2+AVRblb2	6	0	170317
B	Pikp-1:ancHMA+Pikp-2+AVR-PikD	6	3	170317
B	Pikp-1:ancHMA+Pikp-2+AVRblb2	6	3.5	170317
B	Pikp-1:ancHMA+ev+AVRblb2	6	0	170317
B	Pikp-1+Pikp-2+AVR-PikD	6	0	170317
B	Pikp-1:ancHMA-LY+Pikp-2+AVR-PikD	6	1.5	170317
B	Pikp-1:ancHMA-LY+Pikp-2+AVRblb2	6	2	170317
B	Pikp-1:ancHMA-LY+ev+AVRblb2	6	0	170317
B	Pikp-1+Pikp-2+AVRblb2	7	0	170317
B	Pikp-1:ancHMA+Pikp-2+AVR-PikD	7	3	170317
B	Pikp-1:ancHMA+Pikp-2+AVRblb2	7	3	170317
B	Pikp-1:ancHMA+ev+AVRblb2	7	0	170317
B	Pikp-1+Pikp-2+AVR-PikD	7	2	170317
B	Pikp-1:ancHMA-LY+Pikp-2+AVR-PikD	7	1	170317
B	Pikp-1:ancHMA-LY+Pikp-2+AVRblb2	7	2.5	170317
B	Pikp-1:ancHMA-LY+ev+AVRblb2	7	0	170317
B	Pikp-1+Pikp-2+AVRblb2	8	0	170317
B	Pikp-1:ancHMA+Pikp-2+AVR-PikD	8	1	170317
B	Pikp-1:ancHMA+Pikp-2+AVRblb2	8	2	170317
B	Pikp-1:ancHMA+ev+AVRblb2	8	0	170317
B	Pikp-1+Pikp-2+AVR-PikD	8	1	170317
B	Pikp-1:ancHMA-LY+Pikp-2+AVR-PikD	8	1	170317
B	Pikp-1:ancHMA-LY+Pikp-2+AVRblb2	8	1	170317
B	Pikp-1:ancHMA-LY+ev+AVRblb2	8	0	170317
B	Pikp-1+Pikp-2+AVRblb2	9	0	170317
B	Pikp-1:ancHMA+Pikp-2+AVR-PikD	9	3.5	170317
B	Pikp-1:ancHMA+Pikp-2+AVRblb2	9	3.5	170317
B	Pikp-1:ancHMA+ev+AVRblb2	9	0	170317
B	Pikp-1+Pikp-2+AVR-PikD	9	1	170317
B	Pikp-1:ancHMA-LY+Pikp-2+AVR-PikD	9	1	170317
B	Pikp-1:ancHMA-LY+Pikp-2+AVRblb2	9	2	170317
B	Pikp-1:ancHMA-LY+ev+AVRblb2	9	0	170317
B	Pikp-1+Pikp-2+AVRblb2	10	0	170317
B	Pikp-1:ancHMA+Pikp-2+AVR-PikD	10	3	170317
B	Pikp-1:ancHMA+Pikp-2+AVRblb2	10	3	170317
B	Pikp-1:ancHMA+ev+AVRblb2	10	0	170317
B	Pikp-1+Pikp-2+AVR-PikD	10	2	170317
B	Pikp-1:ancHMA-LY+Pikp-2+AVR-PikD	10	2	170317
B	Pikp-1:ancHMA-LY+Pikp-2+AVRblb2	10	2	170317
B	Pikp-1:ancHMA-LY+ev+AVRblb2	10	0	170317
B	Pikp-1+Pikp-2+AVRblb2	11	0	170317
B	Pikp-1:ancHMA+Pikp-2+AVR-PikD	11	3	170317
B	Pikp-1:ancHMA+Pikp-2+AVRblb2	11	3	170317
B	Pikp-1:ancHMA+ev+AVRblb2	11	0	170317
B	Pikp-1+Pikp-2+AVR-PikD	11	2	170317
B	Pikp-1:ancHMA-LY+Pikp-2+AVR-PikD	11	2	170317
B	Pikp-1:ancHMA-LY+Pikp-2+AVRblb2	11	2	170317
B	Pikp-1:ancHMA-LY+ev+AVRblb2	11	0	170317
B	Pikp-1+Pikp-2+AVRblb2	12	0	170317
B	Pikp-1:ancHMA+Pikp-2+AVR-PikD	12	3	170317
B	Pikp-1:ancHMA+Pikp-2+AVRblb2	12	3	170317
B	Pikp-1:ancHMA+ev+AVRblb2	12	0	170317
B	Pikp-1+Pikp-2+AVR-PikD	12	1	170317
B	Pikp-1:ancHMA-LY+Pikp-2+AVR-PikD	12	1	170317
B	Pikp-1:ancHMA-LY+Pikp-2+AVRblb2	12	1	170317
B	Pikp-1:ancHMA-LY+ev+AVRblb2	12	0	170317
B	Pikp-1+Pikp-2+AVRblb2	13	0	170317
B	Pikp-1:ancHMA+Pikp-2+AVR-PikD	13	3	170317
B	Pikp-1:ancHMA+Pikp-2+AVRblb2	13	3.5	170317
B	Pikp-1:ancHMA+ev+AVRblb2	13	1	170317
B	Pikp-1+Pikp-2+AVR-PikD	13	1	170317
B	Pikp-1:ancHMA-LY+Pikp-2+AVR-PikD	13	2	170317
B	Pikp-1:ancHMA-LY+Pikp-2+AVRblb2	13	2	170317
B	Pikp-1:ancHMA-LY+ev+AVRblb2	13	0	170317
B	Pikp-1+Pikp-2+AVRblb2	14	0	170317
B	Pikp-1:ancHMA+Pikp-2+AVR-PikD	14	3.5	170317
B	Pikp-1:ancHMA+Pikp-2+AVRblb2	14	4	170317
B	Pikp-1:ancHMA+ev+AVRblb2	14	0	170317
B	Pikp-1+Pikp-2+AVR-PikD	14	0	170317
B	Pikp-1:ancHMA-LY+Pikp-2+AVR-PikD	14	2	170317
B	Pikp-1:ancHMA-LY+Pikp-2+AVRblb2	14	2	170317
B	Pikp-1:ancHMA-LY+ev+AVRblb2	14	0	170317
B	Pikp-1+Pikp-2+AVRblb2	15	0	170317
B	Pikp-1:ancHMA+Pikp-2+AVR-PikD	15	2	170317
B	Pikp-1:ancHMA+Pikp-2+AVRblb2	15	2	170317
B	Pikp-1:ancHMA+ev+AVRblb2	15	0	170317
B	Pikp-1+Pikp-2+AVR-PikD	15	0	170317
B	Pikp-1:ancHMA-LY+Pikp-2+AVR-PikD	15	1	170317
B	Pikp-1:ancHMA-LY+Pikp-2+AVRblb2	15	2	170317
B	Pikp-1:ancHMA-LY+ev+AVRblb2	15	0	170317
B	Pikp-1+Pikp-2+AVRblb2	16	0	170317
B	Pikp-1:ancHMA+Pikp-2+AVR-PikD	16	2	170317
B	Pikp-1:ancHMA+Pikp-2+AVRblb2	16	3	170317
B	Pikp-1:ancHMA+ev+AVRblb2	16	0	170317
B	Pikp-1+Pikp-2+AVR-PikD	16	1	170317
B	Pikp-1:ancHMA-LY+Pikp-2+AVR-PikD	16	1	170317
B	Pikp-1:ancHMA-LY+Pikp-2+AVRblb2	16	2	170317
B	Pikp-1:ancHMA-LY+ev+AVRblb2	16	0	170317
B	Pikp-1+Pikp-2+AVRblb2	17	0	170317
B	Pikp-1:ancHMA+Pikp-2+AVR-PikD	17	1	170317
B	Pikp-1:ancHMA+Pikp-2+AVRblb2	17	1	170317
B	Pikp-1:ancHMA+ev+AVRblb2	17	0	170317
B	Pikp-1+Pikp-2+AVR-PikD	17	0	170317
B	Pikp-1:ancHMA-LY+Pikp-2+AVR-PikD	17	1	170317
B	Pikp-1:ancHMA-LY+Pikp-2+AVRblb2	17	1	170317
B	Pikp-1:ancHMA-LY+ev+AVRblb2	17	0	170317
B	Pikp-1+Pikp-2+AVRblb2	18	0	170317
B	Pikp-1:ancHMA+Pikp-2+AVR-PikD	18	3	170317
B	Pikp-1:ancHMA+Pikp-2+AVRblb2	18	3.5	170317
B	Pikp-1:ancHMA+ev+AVRblb2	18	0	170317
B	Pikp-1+Pikp-2+AVR-PikD	18	2	170317
B	Pikp-1:ancHMA-LY+Pikp-2+AVR-PikD	18	2	170317
B	Pikp-1:ancHMA-LY+Pikp-2+AVRblb2	18	3	170317
B	Pikp-1:ancHMA-LY+ev+AVRblb2	18	0	170317
B	Pikp-1+Pikp-2+AVRblb2	19	0	170317
B	Pikp-1:ancHMA+Pikp-2+AVR-PikD	19	1	170317
B	Pikp-1:ancHMA+Pikp-2+AVRblb2	19	2.5	170317
B	Pikp-1:ancHMA+ev+AVRblb2	19	0	170317
B	Pikp-1+Pikp-2+AVR-PikD	19	0.5	170317
B	Pikp-1:ancHMA-LY+Pikp-2+AVR-PikD	19	1	170317
B	Pikp-1:ancHMA-LY+Pikp-2+AVRblb2	19	3	170317
B	Pikp-1:ancHMA-LY+ev+AVRblb2	19	0	170317
B	Pikp-1+Pikp-2+AVRblb2	20	0	170317
B	Pikp-1:ancHMA+Pikp-2+AVR-PikD	20	2	170317
B	Pikp-1:ancHMA+Pikp-2+AVRblb2	20	3	170317
B	Pikp-1:ancHMA+ev+AVRblb2	20	0	170317
B	Pikp-1+Pikp-2+AVR-PikD	20	1	170317
B	Pikp-1:ancHMA-LY+Pikp-2+AVR-PikD	20	2	170317
B	Pikp-1:ancHMA-LY+Pikp-2+AVRblb2	20	3	170317
B	Pikp-1:ancHMA-LY+ev+AVRblb2	20	0	170317
B	Pikp-1+Pikp-2+AVRblb2	25	0	170317
B	Pikp-1:ancHMA+Pikp-2+AVR-PikD	25	1.5	170317
B	Pikp-1:ancHMA+Pikp-2+AVRblb2	25	2.75	170317
B	Pikp-1:ancHMA+ev+AVRblb2	25	0	170317
B	Pikp-1+Pikp-2+AVR-PikD	25	0.75	170317
B	Pikp-1:ancHMA-LY+Pikp-2+AVR-PikD	25	1.5	170317
B	Pikp-1:ancHMA-LY+Pikp-2+AVRblb2	25	3	170317
B	Pikp-1:ancHMA-LY+ev+AVRblb2	25	0	170317
B	Pikp-1+Pikp-2+AVRblb2	26	0	170317
B	Pikp-1:ancHMA+Pikp-2+AVR-PikD	26	0.707107	170317
B	Pikp-1:ancHMA+Pikp-2+AVRblb2	26	0.353553	170317
B	Pikp-1:ancHMA+ev+AVRblb2	26	0	170317
B	Pikp-1+Pikp-2+AVR-PikD	26	0.353553	170317
B	Pikp-1:ancHMA-LY+Pikp-2+AVR-PikD	26	0.707107	170317
B	Pikp-1:ancHMA-LY+Pikp-2+AVRblb2	26	0	170317
B	Pikp-1:ancHMA-LY+ev+AVRblb2	26	0	170317
B	Pikp-1+Pikp-2+AVR-PikD	1	2	181130
B	Pikp-1+Pikp-2+AVRblb2	1	2	181130
B	Pikp-1:ancHMA-LY+Pikp-2+AVR-PikD	1	2	181130
B	Pikp-1:ancHMA-LY+Pikp-2+AVRblb2	1	2	181130
B	Pikp-1:ancHMA-LY+ev+AVRblb2	1	2	181130
B	Pikp-1+Pikp-2+AVR-PikD	2	2.5	181130
B	Pikp-1+Pikp-2+AVRblb2	2	1	181130
B	Pikp-1:ancHMA-LY+Pikp-2+AVR-PikD	2	1.5	181130
B	Pikp-1:ancHMA-LY+Pikp-2+AVRblb2	2	1.5	181130
B	Pikp-1:ancHMA-LY+ev+AVRblb2	2	0	181130
B	Pikp-1+Pikp-2+AVR-PikD	3	3.5	181130
B	Pikp-1+Pikp-2+AVRblb2	3	1	181130
B	Pikp-1:ancHMA-LY+Pikp-2+AVR-PikD	3	1	181130
B	Pikp-1:ancHMA-LY+Pikp-2+AVRblb2	3	1	181130
B	Pikp-1:ancHMA-LY+ev+AVRblb2	3	0	181130
B	Pikp-1+Pikp-2+AVR-PikD	4	2	181130
B	Pikp-1+Pikp-2+AVRblb2	4	0	181130
B	Pikp-1:ancHMA-LY+Pikp-2+AVR-PikD	4	1	181130
B	Pikp-1:ancHMA-LY+Pikp-2+AVRblb2	4	1	181130
B	Pikp-1:ancHMA-LY+ev+AVRblb2	4	0	181130
B	Pikp-1+Pikp-2+AVR-PikD	5	2	181130
B	Pikp-1+Pikp-2+AVRblb2	5	1	181130
B	Pikp-1:ancHMA-LY+Pikp-2+AVR-PikD	5	0	181130
B	Pikp-1:ancHMA-LY+Pikp-2+AVRblb2	5	2	181130
B	Pikp-1:ancHMA-LY+ev+AVRblb2	5	0	181130
B	Pikp-1+Pikp-2+AVR-PikD	6	2	181130
B	Pikp-1+Pikp-2+AVRblb2	6	0.5	181130
B	Pikp-1:ancHMA-LY+Pikp-2+AVR-PikD	6	2	181130
B	Pikp-1:ancHMA-LY+Pikp-2+AVRblb2	6	2	181130
B	Pikp-1:ancHMA-LY+ev+AVRblb2	6	0	181130
B	Pikp-1+Pikp-2+AVR-PikD	7	3	181130
B	Pikp-1+Pikp-2+AVRblb2	7	0	181130
B	Pikp-1:ancHMA-LY+Pikp-2+AVR-PikD	7	2.5	181130
B	Pikp-1:ancHMA-LY+Pikp-2+AVRblb2	7	2.5	181130
B	Pikp-1:ancHMA-LY+ev+AVRblb2	7	0	181130
B	Pikp-1+Pikp-2+AVR-PikD	8	2	181130
B	Pikp-1+Pikp-2+AVRblb2	8	0	181130
B	Pikp-1:ancHMA-LY+Pikp-2+AVR-PikD	8	0	181130
B	Pikp-1:ancHMA-LY+Pikp-2+AVRblb2	8	2	181130
B	Pikp-1:ancHMA-LY+ev+AVRblb2	8	0	181130
B	Pikp-1+Pikp-2+AVR-PikD	9	2.5	181130
B	Pikp-1+Pikp-2+AVRblb2	9	0.5	181130
B	Pikp-1:ancHMA-LY+Pikp-2+AVR-PikD	9	2	181130
B	Pikp-1:ancHMA-LY+Pikp-2+AVRblb2	9	2	181130
B	Pikp-1:ancHMA-LY+ev+AVRblb2	9	0	181130
B	Pikp-1+Pikp-2+AVR-PikD	10	2	181130
B	Pikp-1+Pikp-2+AVRblb2	10	1	181130
B	Pikp-1:ancHMA-LY+Pikp-2+AVR-PikD	10	1.5	181130
B	Pikp-1:ancHMA-LY+Pikp-2+AVRblb2	10	1	181130
B	Pikp-1:ancHMA-LY+ev+AVRblb2	10	0	181130
B	Pikp-1+Pikp-2+AVR-PikD	11	2.5	181130
B	Pikp-1+Pikp-2+AVRblb2	11	1	181130
B	Pikp-1:ancHMA-LY+Pikp-2+AVR-PikD	11	1	181130
B	Pikp-1:ancHMA-LY+Pikp-2+AVRblb2	11	2	181130
B	Pikp-1:ancHMA-LY+ev+AVRblb2	11	1.5	181130
B	Pikp-1+Pikp-2+AVR-PikD	12	2	181130
B	Pikp-1+Pikp-2+AVRblb2	12	0	181130
B	Pikp-1:ancHMA-LY+Pikp-2+AVR-PikD	12	1.5	181130
B	Pikp-1:ancHMA-LY+Pikp-2+AVRblb2	12	1.5	181130
B	Pikp-1:ancHMA-LY+ev+AVRblb2	12	0	181130
B	Pikp-1+Pikp-2+AVR-PikD	13	1	181130
B	Pikp-1+Pikp-2+AVRblb2	13	1	181130
B	Pikp-1:ancHMA-LY+Pikp-2+AVR-PikD	13	1	181130
B	Pikp-1:ancHMA-LY+Pikp-2+AVRblb2	13	1	181130
B	Pikp-1:ancHMA-LY+ev+AVRblb2	13	0	181130
B	Pikp-1+Pikp-2+AVR-PikD	14	3	181130
B	Pikp-1+Pikp-2+AVRblb2	14	0.5	181130
B	Pikp-1:ancHMA-LY+Pikp-2+AVR-PikD	14	2	181130
B	Pikp-1:ancHMA-LY+Pikp-2+AVRblb2	14	2	181130
B	Pikp-1:ancHMA-LY+ev+AVRblb2	14	0	181130
B	Pikp-1+Pikp-2+AVR-PikD	15	2	181130
B	Pikp-1+Pikp-2+AVRblb2	15	1	181130
B	Pikp-1:ancHMA-LY+Pikp-2+AVR-PikD	15	1	181130
B	Pikp-1:ancHMA-LY+Pikp-2+AVRblb2	15	1	181130
B	Pikp-1:ancHMA-LY+ev+AVRblb2	15	1	181130
B	Pikp-1+Pikp-2+AVR-PikD	16	2	181130
B	Pikp-1+Pikp-2+AVRblb2	16	1	181130
B	Pikp-1:ancHMA-LY+Pikp-2+AVR-PikD	16	1	181130
B	Pikp-1:ancHMA-LY+Pikp-2+AVRblb2	16	2	181130
B	Pikp-1:ancHMA-LY+ev+AVRblb2	16	0	181130
B	Pikp-1+Pikp-2+AVR-PikD	17	2.5	181130
B	Pikp-1+Pikp-2+AVRblb2	17	1	181130
B	Pikp-1:ancHMA-LY+Pikp-2+AVR-PikD	17	0	181130
B	Pikp-1:ancHMA-LY+Pikp-2+AVRblb2	17	2	181130
B	Pikp-1:ancHMA-LY+ev+AVRblb2	17	1	181130
B	Pikp-1+Pikp-2+AVR-PikD	18	2	181130
B	Pikp-1+Pikp-2+AVRblb2	18	1.5	181130
B	Pikp-1:ancHMA-LY+Pikp-2+AVR-PikD	18	2	181130
B	Pikp-1:ancHMA-LY+Pikp-2+AVRblb2	18	2	181130
B	Pikp-1:ancHMA-LY+ev+AVRblb2	18	0	181130
B	Pikp-1+Pikp-2+AVR-PikD	19	1	181130
B	Pikp-1+Pikp-2+AVRblb2	19	1	181130
B	Pikp-1:ancHMA-LY+Pikp-2+AVR-PikD	19	0	181130
B	Pikp-1:ancHMA-LY+Pikp-2+AVRblb2	19	0.5	181130
B	Pikp-1:ancHMA-LY+ev+AVRblb2	19	0.5	181130
B	Pikp-1+Pikp-2+AVR-PikD	20	3	181130
B	Pikp-1+Pikp-2+AVRblb2	20	2	181130
B	Pikp-1:ancHMA-LY+Pikp-2+AVR-PikD	20	2	181130
B	Pikp-1:ancHMA-LY+Pikp-2+AVRblb2	20	3	181130
B	Pikp-1:ancHMA-LY+ev+AVRblb2	20	0	181130
B	Pikp-1+Pikp-2+AVR-PikD	21	3	181130
B	Pikp-1+Pikp-2+AVRblb2	21	2.5	181130
B	Pikp-1:ancHMA-LY+Pikp-2+AVR-PikD	21	3	181130
B	Pikp-1:ancHMA-LY+Pikp-2+AVRblb2	21	3.5	181130
B	Pikp-1:ancHMA-LY+ev+AVRblb2	21	0	181130
B	Pikp-1+Pikp-2+AVR-PikD	22	3.5	181130
B	Pikp-1+Pikp-2+AVRblb2	22	1.5	181130
B	Pikp-1:ancHMA-LY+Pikp-2+AVR-PikD	22	2	181130
B	Pikp-1:ancHMA-LY+Pikp-2+AVRblb2	22	2	181130
B	Pikp-1:ancHMA-LY+ev+AVRblb2	22	0	181130
B	Pikp-1+Pikp-2+AVR-PikD	23	3	181130
B	Pikp-1+Pikp-2+AVRblb2	23	0.5	181130
B	Pikp-1:ancHMA-LY+Pikp-2+AVR-PikD	23	0.5	181130
B	Pikp-1:ancHMA-LY+Pikp-2+AVRblb2	23	0.5	181130
B	Pikp-1:ancHMA-LY+ev+AVRblb2	23	0	181130

## Sheet: ancHMA-PI
setup	condition	leaf	score	replicate
B	Pikp-1+Pikp-2+AVR-PikD	1	2	161019		Replicate: each replicate has a unique 6 digit identifier
B	Pikp-1:ancHMA+Pikp-2+AVR-PikD	1	2	161019		ev: empty vector
B	Pikp-1:ancHMA+Pikp-2+AVRblb2	1	3	161019
B	Pikp-1:ancHMA+ev+AVRblb2	1	0	161019
B	Pikp-1+Pikp-2+AVRblb2	1	0	161019
B	Pikp-1:ancHMA-PI+Pikp-2+AVR-PikD	1	2	161019
B	Pikp-1:ancHMA-PI+Pikp-2+AVRblb2	1	2	161019
B	Pikp-1:ancHMA-PI+ev+AVRblb2	1	0	161019
B	Pikp-1+Pikp-2+AVR-PikD	2	3	161019
B	Pikp-1:ancHMA+Pikp-2+AVR-PikD	2	2	161019
B	Pikp-1:ancHMA+Pikp-2+AVRblb2	2	3	161019
B	Pikp-1:ancHMA+ev+AVRblb2	2	0	161019
B	Pikp-1+Pikp-2+AVRblb2	2	0	161019
B	Pikp-1:ancHMA-PI+Pikp-2+AVR-PikD	2	2	161019
B	Pikp-1:ancHMA-PI+Pikp-2+AVRblb2	2	3	161019
B	Pikp-1:ancHMA-PI+ev+AVRblb2	2	0	161019
B	Pikp-1+Pikp-2+AVR-PikD	3	3	161019
B	Pikp-1:ancHMA+Pikp-2+AVR-PikD	3	2	161019
B	Pikp-1:ancHMA+Pikp-2+AVRblb2	3	3	161019
B	Pikp-1:ancHMA+ev+AVRblb2	3	0	161019
B	Pikp-1+Pikp-2+AVRblb2	3	0	161019
B	Pikp-1:ancHMA-PI+Pikp-2+AVR-PikD	3	2	161019
B	Pikp-1:ancHMA-PI+Pikp-2+AVRblb2	3	2	161019
B	Pikp-1:ancHMA-PI+ev+AVRblb2	3	0	161019
B	Pikp-1+Pikp-2+AVR-PikD	4	2	161019
B	Pikp-1:ancHMA+Pikp-2+AVR-PikD	4	2	161019
B	Pikp-1:ancHMA+Pikp-2+AVRblb2	4	2	161019
B	Pikp-1:ancHMA+ev+AVRblb2	4	0	161019
B	Pikp-1+Pikp-2+AVRblb2	4	0	161019
B	Pikp-1:ancHMA-PI+Pikp-2+AVR-PikD	4	2	161019
B	Pikp-1:ancHMA-PI+Pikp-2+AVRblb2	4	2	161019
B	Pikp-1:ancHMA-PI+ev+AVRblb2	4	0	161019
B	Pikp-1+Pikp-2+AVR-PikD	5	3	161019
B	Pikp-1:ancHMA+Pikp-2+AVR-PikD	5	3	161019
B	Pikp-1:ancHMA+Pikp-2+AVRblb2	5	3	161019
B	Pikp-1:ancHMA+ev+AVRblb2	5	0	161019
B	Pikp-1+Pikp-2+AVRblb2	5	0	161019
B	Pikp-1:ancHMA-PI+Pikp-2+AVR-PikD	5	3	161019
B	Pikp-1:ancHMA-PI+Pikp-2+AVRblb2	5	3	161019
B	Pikp-1:ancHMA-PI+ev+AVRblb2	5	0	161019
B	Pikp-1+Pikp-2+AVR-PikD	6	4	161019
B	Pikp-1:ancHMA+Pikp-2+AVR-PikD	6	3	161019
B	Pikp-1:ancHMA+Pikp-2+AVRblb2	6	2	161019
B	Pikp-1:ancHMA+ev+AVRblb2	6	0	161019
B	Pikp-1+Pikp-2+AVRblb2	6	0	161019
B	Pikp-1:ancHMA-PI+Pikp-2+AVR-PikD	6	1	161019
B	Pikp-1:ancHMA-PI+Pikp-2+AVRblb2	6	1	161019
B	Pikp-1:ancHMA-PI+ev+AVRblb2	6	0	161019
B	Pikp-1+Pikp-2+AVR-PikD	7	2	161019
B	Pikp-1:ancHMA+Pikp-2+AVR-PikD	7	3	161019
B	Pikp-1:ancHMA+Pikp-2+AVRblb2	7	3	161019
B	Pikp-1:ancHMA+ev+AVRblb2	7	0	161019
B	Pikp-1+Pikp-2+AVRblb2	7	0	161019
B	Pikp-1:ancHMA-PI+Pikp-2+AVR-PikD	7	2	161019
B	Pikp-1:ancHMA-PI+Pikp-2+AVRblb2	7	3	161019
B	Pikp-1:ancHMA-PI+ev+AVRblb2	7	0	161019
B	Pikp-1+Pikp-2+AVR-PikD	8	3	161019
B	Pikp-1:ancHMA+Pikp-2+AVR-PikD	8	3	161019
B	Pikp-1:ancHMA+Pikp-2+AVRblb2	8	3	161019
B	Pikp-1:ancHMA+ev+AVRblb2	8	0	161019
B	Pikp-1+Pikp-2+AVRblb2	8	0	161019
B	Pikp-1:ancHMA-PI+Pikp-2+AVR-PikD	8	2	161019
B	Pikp-1:ancHMA-PI+Pikp-2+AVRblb2	8	3	161019
B	Pikp-1:ancHMA-PI+ev+AVRblb2	8	0	161019
B	Pikp-1+Pikp-2+AVR-PikD	9	2	161019
B	Pikp-1:ancHMA+Pikp-2+AVR-PikD	9	2	161019
B	Pikp-1:ancHMA+Pikp-2+AVRblb2	9	3	161019
B	Pikp-1:ancHMA+ev+AVRblb2	9	0	161019
B	Pikp-1+Pikp-2+AVRblb2	9	0	161019
B	Pikp-1:ancHMA-PI+Pikp-2+AVR-PikD	9	2	161019
B	Pikp-1:ancHMA-PI+Pikp-2+AVRblb2	9	2	161019
B	Pikp-1:ancHMA-PI+ev+AVRblb2	9	0	161019
B	Pikp-1+Pikp-2+AVR-PikD	10	2	161019
B	Pikp-1:ancHMA+Pikp-2+AVR-PikD	10	3	161019
B	Pikp-1:ancHMA+Pikp-2+AVRblb2	10	3	161019
B	Pikp-1:ancHMA+ev+AVRblb2	10	0	161019
B	Pikp-1+Pikp-2+AVRblb2	10	0	161019
B	Pikp-1:ancHMA-PI+Pikp-2+AVR-PikD	10	3	161019
B	Pikp-1:ancHMA-PI+Pikp-2+AVRblb2	10	3	161019
B	Pikp-1:ancHMA-PI+ev+AVRblb2	10	0	161019
B	Pikp-1+Pikp-2+AVR-PikD	11	3	161019
B	Pikp-1:ancHMA+Pikp-2+AVR-PikD	11	3	161019
B	Pikp-1:ancHMA+Pikp-2+AVRblb2	11	3	161019
B	Pikp-1:ancHMA+ev+AVRblb2	11	0	161019
B	Pikp-1+Pikp-2+AVRblb2	11	0	161019
B	Pikp-1:ancHMA-PI+Pikp-2+AVR-PikD	11	3	161019
B	Pikp-1:ancHMA-PI+Pikp-2+AVRblb2	11	3	161019
B	Pikp-1:ancHMA-PI+ev+AVRblb2	11	0	161019
B	Pikp-1+Pikp-2+AVR-PikD	12	2	161019
B	Pikp-1:ancHMA+Pikp-2+AVR-PikD	12	2	161019
B	Pikp-1:ancHMA+Pikp-2+AVRblb2	12	2	161019
B	Pikp-1:ancHMA+ev+AVRblb2	12	0	161019
B	Pikp-1+Pikp-2+AVRblb2	12	0	161019
B	Pikp-1:ancHMA-PI+Pikp-2+AVR-PikD	12	2	161019
B	Pikp-1:ancHMA-PI+Pikp-2+AVRblb2	12	1	161019
B	Pikp-1:ancHMA-PI+ev+AVRblb2	12	0	161019
B	Pikp-1+Pikp-2+AVR-PikD	13	3	161019
B	Pikp-1:ancHMA+Pikp-2+AVR-PikD	13	3	161019
B	Pikp-1:ancHMA+Pikp-2+AVRblb2	13	4	161019
B	Pikp-1:ancHMA+ev+AVRblb2	13	0	161019
B	Pikp-1+Pikp-2+AVRblb2	13	0	161019
B	Pikp-1:ancHMA-PI+Pikp-2+AVR-PikD	13	3	161019
B	Pikp-1:ancHMA-PI+Pikp-2+AVRblb2	13	3	161019
B	Pikp-1:ancHMA-PI+ev+AVRblb2	13	0	161019
B	Pikp-1+Pikp-2+AVR-PikD	14	2	161019
B	Pikp-1:ancHMA+Pikp-2+AVR-PikD	14	2	161019
B	Pikp-1:ancHMA+Pikp-2+AVRblb2	14	2	161019
B	Pikp-1:ancHMA+ev+AVRblb2	14	0	161019
B	Pikp-1+Pikp-2+AVRblb2	14	0	161019
B	Pikp-1:ancHMA-PI+Pikp-2+AVR-PikD	14	2	161019
B	Pikp-1:ancHMA-PI+Pikp-2+AVRblb2	14	2	161019
B	Pikp-1:ancHMA-PI+ev+AVRblb2	14	0	161019
B	Pikp-1+Pikp-2+AVR-PikD	15	3	161019
B	Pikp-1:ancHMA+Pikp-2+AVR-PikD	15	2	161019
B	Pikp-1:ancHMA+Pikp-2+AVRblb2	15	3	161019
B	Pikp-1:ancHMA+ev+AVRblb2	15	0	161019
B	Pikp-1+Pikp-2+AVRblb2	15	0	161019
B	Pikp-1:ancHMA-PI+Pikp-2+AVR-PikD	15	2	161019
B	Pikp-1:ancHMA-PI+Pikp-2+AVRblb2	15	2	161019
B	Pikp-1:ancHMA-PI+ev+AVRblb2	15	0	161019
B	Pikp-1+Pikp-2+AVR-PikD	16	2	161019
B	Pikp-1:ancHMA+Pikp-2+AVR-PikD	16	2	161019
B	Pikp-1:ancHMA+Pikp-2+AVRblb2	16	2	161019
B	Pikp-1:ancHMA+ev+AVRblb2	16	0	161019
B	Pikp-1+Pikp-2+AVRblb2	16	0	161019
B	Pikp-1:ancHMA-PI+Pikp-2+AVR-PikD	16	2	161019
B	Pikp-1:ancHMA-PI+Pikp-2+AVRblb2	16	2	161019
B	Pikp-1:ancHMA-PI+ev+AVRblb2	16	0	161019
B	Pikp-1+Pikp-2+AVR-PikD	17	2	161019
B	Pikp-1:ancHMA+Pikp-2+AVR-PikD	17	2	161019
B	Pikp-1:ancHMA+Pikp-2+AVRblb2	17	2	161019
B	Pikp-1:ancHMA+ev+AVRblb2	17	0	161019
B	Pikp-1+Pikp-2+AVRblb2	17	0	161019
B	Pikp-1:ancHMA-PI+Pikp-2+AVR-PikD	17	2	161019
B	Pikp-1:ancHMA-PI+Pikp-2+AVRblb2	17	2	161019
B	Pikp-1:ancHMA-PI+ev+AVRblb2	17	0	161019
B	Pikp-1+Pikp-2+AVR-PikD	18	3	161019
B	Pikp-1:ancHMA+Pikp-2+AVR-PikD	18	3	161019
B	Pikp-1:ancHMA+Pikp-2+AVRblb2	18	2	161019
B	Pikp-1:ancHMA+ev+AVRblb2	18	0	161019
B	Pikp-1+Pikp-2+AVRblb2	18	0	161019
B	Pikp-1:ancHMA-PI+Pikp-2+AVR-PikD	18	2	161019
B	Pikp-1:ancHMA-PI+Pikp-2+AVRblb2	18	2	161019
B	Pikp-1:ancHMA-PI+ev+AVRblb2	18	0	161019
B	Pikp-1+Pikp-2+AVR-PikD	19	2	161019
B	Pikp-1:ancHMA+Pikp-2+AVR-PikD	19	2	161019
B	Pikp-1:ancHMA+Pikp-2+AVRblb2	19	2	161019
B	Pikp-1:ancHMA+ev+AVRblb2	19	0	161019
B	Pikp-1+Pikp-2+AVRblb2	19	0	161019
B	Pikp-1:ancHMA-PI+Pikp-2+AVR-PikD	19	2	161019
B	Pikp-1:ancHMA-PI+Pikp-2+AVRblb2	19	2	161019
B	Pikp-1:ancHMA-PI+ev+AVRblb2	19	0	161019
B	Pikp-1+Pikp-2+AVR-PikD	20	3	161019
B	Pikp-1:ancHMA+Pikp-2+AVR-PikD	20	1	161019
B	Pikp-1:ancHMA+Pikp-2+AVRblb2	20	3	161019
B	Pikp-1:ancHMA+ev+AVRblb2	20	0	161019
B	Pikp-1+Pikp-2+AVRblb2	20	0	161019
B	Pikp-1:ancHMA-PI+Pikp-2+AVR-PikD	20	2	161019
B	Pikp-1:ancHMA-PI+Pikp-2+AVRblb2	20	3	161019
B	Pikp-1:ancHMA-PI+ev+AVRblb2	20	0	161019
B	Pikp-1+Pikp-2+AVR-PikD	21	2	161019
B	Pikp-1:ancHMA+Pikp-2+AVR-PikD	21	2	161019
B	Pikp-1:ancHMA+Pikp-2+AVRblb2	21	2	161019
B	Pikp-1:ancHMA+ev+AVRblb2	21	0	161019
B	Pikp-1+Pikp-2+AVRblb2	21	0	161019
B	Pikp-1:ancHMA-PI+Pikp-2+AVR-PikD	21	2	161019
B	Pikp-1:ancHMA-PI+Pikp-2+AVRblb2	21	2	161019
B	Pikp-1:ancHMA-PI+ev+AVRblb2	21	0	161019
B	Pikp-1+Pikp-2+AVR-PikD	22	2	161019
B	Pikp-1:ancHMA+Pikp-2+AVR-PikD	22	2	161019
B	Pikp-1:ancHMA+Pikp-2+AVRblb2	22	3	161019
B	Pikp-1:ancHMA+ev+AVRblb2	22	0	161019
B	Pikp-1+Pikp-2+AVRblb2	22	0	161019
B	Pikp-1:ancHMA-PI+Pikp-2+AVR-PikD	22	2	161019
B	Pikp-1:ancHMA-PI+Pikp-2+AVRblb2	22	2	161019
B	Pikp-1:ancHMA-PI+ev+AVRblb2	22	0	161019
B	Pikp-1+Pikp-2+AVR-PikD	23	2	161019
B	Pikp-1:ancHMA+Pikp-2+AVR-PikD	23	2	161019
B	Pikp-1:ancHMA+Pikp-2+AVRblb2	23	3	161019
B	Pikp-1:ancHMA+ev+AVRblb2	23	0	161019
B	Pikp-1+Pikp-2+AVRblb2	23	0	161019
B	Pikp-1:ancHMA-PI+Pikp-2+AVR-PikD	23	2	161019
B	Pikp-1:ancHMA-PI+Pikp-2+AVRblb2	23	2	161019
B	Pikp-1:ancHMA-PI+ev+AVRblb2	23	0	161019
B	Pikp-1+Pikp-2+AVR-PikD	24	3	161019
B	Pikp-1:ancHMA+Pikp-2+AVR-PikD	24	3	161019
B	Pikp-1:ancHMA+Pikp-2+AVRblb2	24	3	161019
B	Pikp-1:ancHMA+ev+AVRblb2	24	0	161019
B	Pikp-1+Pikp-2+AVRblb2	24	0	161019
B	Pikp-1:ancHMA-PI+Pikp-2+AVR-PikD	24	2	161019
B	Pikp-1:ancHMA-PI+Pikp-2+AVRblb2	24	2	161019
B	Pikp-1:ancHMA-PI+ev+AVRblb2	24	0	161019
A	Pikp-1+Pikp-2+AVR-PikD	1	2	170317
A	Pikp-1:ancHMA+Pikp-2+AVR-PikD	1	3	170317
A	Pikp-1:ancHMA+Pikp-2+AVRblb2	1	3	170317
A	Pikp-1:ancHMA+ev+AVRblb2	1	0	170317
A	Pikp-1+Pikp-2+AVRblb2	1	1	170317
A	Pikp-1:ancHMA-PI+Pikp-2+AVR-PikD	1	1	170317
A	Pikp-1:ancHMA-PI+Pikp-2+AVRblb2	1	3	170317
A	Pikp-1:ancHMA-PI+ev+AVRblb2	1	0	170317
A	Pikp-1+Pikp-2+AVR-PikD	2	1	170317
A	Pikp-1:ancHMA+Pikp-2+AVR-PikD	2	3	170317
A	Pikp-1:ancHMA+Pikp-2+AVRblb2	2	3.5	170317
A	Pikp-1:ancHMA+ev+AVRblb2	2	0	170317
A	Pikp-1+Pikp-2+AVRblb2	2	0	170317
A	Pikp-1:ancHMA-PI+Pikp-2+AVR-PikD	2	2	170317
A	Pikp-1:ancHMA-PI+Pikp-2+AVRblb2	2	2.5	170317
A	Pikp-1:ancHMA-PI+ev+AVRblb2	2	0	170317
A	Pikp-1+Pikp-2+AVR-PikD	3	3	170317
A	Pikp-1:ancHMA+Pikp-2+AVR-PikD	3	3	170317
A	Pikp-1:ancHMA+Pikp-2+AVRblb2	3	3	170317
A	Pikp-1:ancHMA+ev+AVRblb2	3	0	170317
A	Pikp-1+Pikp-2+AVRblb2	3	0	170317
A	Pikp-1:ancHMA-PI+Pikp-2+AVR-PikD	3	2	170317
A	Pikp-1:ancHMA-PI+Pikp-2+AVRblb2	3	3	170317
A	Pikp-1:ancHMA-PI+ev+AVRblb2	3	0	170317
A	Pikp-1+Pikp-2+AVR-PikD	4	3	170317
A	Pikp-1:ancHMA+Pikp-2+AVR-PikD	4	3	170317
A	Pikp-1:ancHMA+Pikp-2+AVRblb2	4	3.5	170317
A	Pikp-1:ancHMA+ev+AVRblb2	4	0	170317
A	Pikp-1+Pikp-2+AVRblb2	4	0	170317
A	Pikp-1:ancHMA-PI+Pikp-2+AVR-PikD	4	3	170317
A	Pikp-1:ancHMA-PI+Pikp-2+AVRblb2	4	3.5	170317
A	Pikp-1:ancHMA-PI+ev+AVRblb2	4	0	170317
A	Pikp-1+Pikp-2+AVR-PikD	5	3	170317
A	Pikp-1:ancHMA+Pikp-2+AVR-PikD	5	2.5	170317
A	Pikp-1:ancHMA+Pikp-2+AVRblb2	5	3	170317
A	Pikp-1:ancHMA+ev+AVRblb2	5	0	170317
A	Pikp-1+Pikp-2+AVRblb2	5	0	170317
A	Pikp-1:ancHMA-PI+Pikp-2+AVR-PikD	5	2.5	170317
A	Pikp-1:ancHMA-PI+Pikp-2+AVRblb2	5	3	170317
A	Pikp-1:ancHMA-PI+ev+AVRblb2	5	0	170317
A	Pikp-1+Pikp-2+AVR-PikD	6	3	170317
A	Pikp-1:ancHMA+Pikp-2+AVR-PikD	6	3	170317
A	Pikp-1:ancHMA+Pikp-2+AVRblb2	6	2	170317
A	Pikp-1:ancHMA+ev+AVRblb2	6	0	170317
A	Pikp-1+Pikp-2+AVRblb2	6	0	170317
A	Pikp-1:ancHMA-PI+Pikp-2+AVR-PikD	6	2	170317
A	Pikp-1:ancHMA-PI+Pikp-2+AVRblb2	6	2	170317
A	Pikp-1:ancHMA-PI+ev+AVRblb2	6	0	170317
A	Pikp-1+Pikp-2+AVR-PikD	7	3	170317
A	Pikp-1:ancHMA+Pikp-2+AVR-PikD	7	3	170317
A	Pikp-1:ancHMA+Pikp-2+AVRblb2	7	3	170317
A	Pikp-1:ancHMA+ev+AVRblb2	7	0	170317
A	Pikp-1+Pikp-2+AVRblb2	7	1	170317
A	Pikp-1:ancHMA-PI+Pikp-2+AVR-PikD	7	3	170317
A	Pikp-1:ancHMA-PI+Pikp-2+AVRblb2	7	3	170317
A	Pikp-1:ancHMA-PI+ev+AVRblb2	7	0	170317
A	Pikp-1+Pikp-2+AVR-PikD	8	3	170317
A	Pikp-1:ancHMA+Pikp-2+AVR-PikD	8	3	170317
A	Pikp-1:ancHMA+Pikp-2+AVRblb2	8	3	170317
A	Pikp-1:ancHMA+ev+AVRblb2	8	0	170317
A	Pikp-1+Pikp-2+AVRblb2	8	0	170317
A	Pikp-1:ancHMA-PI+Pikp-2+AVR-PikD	8	3	170317
A	Pikp-1:ancHMA-PI+Pikp-2+AVRblb2	8	3	170317
A	Pikp-1:ancHMA-PI+ev+AVRblb2	8	0	170317
A	Pikp-1+Pikp-2+AVR-PikD	9	2	170317
A	Pikp-1:ancHMA+Pikp-2+AVR-PikD	9	3	170317
A	Pikp-1:ancHMA+Pikp-2+AVRblb2	9	2	170317
A	Pikp-1:ancHMA+ev+AVRblb2	9	0	170317
A	Pikp-1+Pikp-2+AVRblb2	9	0	170317
A	Pikp-1:ancHMA-PI+Pikp-2+AVR-PikD	9	2	170317
A	Pikp-1:ancHMA-PI+Pikp-2+AVRblb2	9	2	170317
A	Pikp-1:ancHMA-PI+ev+AVRblb2	9	0	170317
A	Pikp-1+Pikp-2+AVR-PikD	10	3	170317
A	Pikp-1:ancHMA+Pikp-2+AVR-PikD	10	3	170317
A	Pikp-1:ancHMA+Pikp-2+AVRblb2	10	3.5	170317
A	Pikp-1:ancHMA+ev+AVRblb2	10	0	170317
A	Pikp-1+Pikp-2+AVRblb2	10	0	170317
A	Pikp-1:ancHMA-PI+Pikp-2+AVR-PikD	10	2	170317
A	Pikp-1:ancHMA-PI+Pikp-2+AVRblb2	10	3	170317
A	Pikp-1:ancHMA-PI+ev+AVRblb2	10	0	170317
A	Pikp-1+Pikp-2+AVR-PikD	11	3	170317
A	Pikp-1:ancHMA+Pikp-2+AVR-PikD	11	2	170317
A	Pikp-1:ancHMA+Pikp-2+AVRblb2	11	2	170317
A	Pikp-1:ancHMA+ev+AVRblb2	11	0	170317
A	Pikp-1+Pikp-2+AVRblb2	11	0	170317
A	Pikp-1:ancHMA-PI+Pikp-2+AVR-PikD	11	2	170317
A	Pikp-1:ancHMA-PI+Pikp-2+AVRblb2	11	2	170317
A	Pikp-1:ancHMA-PI+ev+AVRblb2	11	0	170317
A	Pikp-1+Pikp-2+AVR-PikD	12	2	170317
A	Pikp-1:ancHMA+Pikp-2+AVR-PikD	12	2	170317
A	Pikp-1:ancHMA+Pikp-2+AVRblb2	12	2	170317
A	Pikp-1:ancHMA+ev+AVRblb2	12	0	170317
A	Pikp-1+Pikp-2+AVRblb2	12	0	170317
A	Pikp-1:ancHMA-PI+Pikp-2+AVR-PikD	12	2	170317
A	Pikp-1:ancHMA-PI+Pikp-2+AVRblb2	12	2	170317
A	Pikp-1:ancHMA-PI+ev+AVRblb2	12	0	170317
A	Pikp-1+Pikp-2+AVR-PikD	13	3	170317
A	Pikp-1:ancHMA+Pikp-2+AVR-PikD	13	3	170317
A	Pikp-1:ancHMA+Pikp-2+AVRblb2	13	3	170317
A	Pikp-1:ancHMA+ev+AVRblb2	13	0	170317
A	Pikp-1+Pikp-2+AVRblb2	13	0.5	170317
A	Pikp-1:ancHMA-PI+Pikp-2+AVR-PikD	13	2.5	170317
A	Pikp-1:ancHMA-PI+Pikp-2+AVRblb2	13	3	170317
A	Pikp-1:ancHMA-PI+ev+AVRblb2	13	0	170317
A	Pikp-1+Pikp-2+AVR-PikD	14	2	170317
A	Pikp-1:ancHMA+Pikp-2+AVR-PikD	14	2	170317
A	Pikp-1:ancHMA+Pikp-2+AVRblb2	14	3	170317
A	Pikp-1:ancHMA+ev+AVRblb2	14	0	170317
A	Pikp-1+Pikp-2+AVRblb2	14	0.5	170317
A	Pikp-1:ancHMA-PI+Pikp-2+AVR-PikD	14	2	170317
A	Pikp-1:ancHMA-PI+Pikp-2+AVRblb2	14	3	170317
A	Pikp-1:ancHMA-PI+ev+AVRblb2	14	0	170317
A	Pikp-1+Pikp-2+AVR-PikD	15	3	170317
A	Pikp-1:ancHMA+Pikp-2+AVR-PikD	15	2	170317
A	Pikp-1:ancHMA+Pikp-2+AVRblb2	15	3	170317
A	Pikp-1:ancHMA+ev+AVRblb2	15	0	170317
A	Pikp-1+Pikp-2+AVRblb2	15	0	170317
A	Pikp-1:ancHMA-PI+Pikp-2+AVR-PikD	15	1	170317
A	Pikp-1:ancHMA-PI+Pikp-2+AVRblb2	15	2	170317
A	Pikp-1:ancHMA-PI+ev+AVRblb2	15	0	170317
A	Pikp-1+Pikp-2+AVR-PikD	16	3	170317
A	Pikp-1:ancHMA+Pikp-2+AVR-PikD	16	3	170317
A	Pikp-1:ancHMA+Pikp-2+AVRblb2	16	2.5	170317
A	Pikp-1:ancHMA+ev+AVRblb2	16	0	170317
A	Pikp-1+Pikp-2+AVRblb2	16	0	170317
A	Pikp-1:ancHMA-PI+Pikp-2+AVR-PikD	16	2	170317
A	Pikp-1:ancHMA-PI+Pikp-2+AVRblb2	16	2	170317
A	Pikp-1:ancHMA-PI+ev+AVRblb2	16	0	170317
A	Pikp-1+Pikp-2+AVR-PikD	17	3.5	170317
A	Pikp-1:ancHMA+Pikp-2+AVR-PikD	17	3.5	170317
A	Pikp-1:ancHMA+Pikp-2+AVRblb2	17	3.5	170317
A	Pikp-1:ancHMA+ev+AVRblb2	17	0	170317
A	Pikp-1+Pikp-2+AVRblb2	17	0	170317
A	Pikp-1:ancHMA-PI+Pikp-2+AVR-PikD	17	3.5	170317
A	Pikp-1:ancHMA-PI+Pikp-2+AVRblb2	17	3.5	170317
A	Pikp-1:ancHMA-PI+ev+AVRblb2	17	0	170317
A	Pikp-1+Pikp-2+AVR-PikD	18	3.5	170317
A	Pikp-1:ancHMA+Pikp-2+AVR-PikD	18	3.5	170317
A	Pikp-1:ancHMA+Pikp-2+AVRblb2	18	3.5	170317
A	Pikp-1:ancHMA+ev+AVRblb2	18	0	170317
A	Pikp-1+Pikp-2+AVRblb2	18	0.5	170317
A	Pikp-1:ancHMA-PI+Pikp-2+AVR-PikD	18	3	170317
A	Pikp-1:ancHMA-PI+Pikp-2+AVRblb2	18	3	170317
A	Pikp-1:ancHMA-PI+ev+AVRblb2	18	0	170317
A	Pikp-1+Pikp-2+AVR-PikD	19	3.5	170317
A	Pikp-1:ancHMA+Pikp-2+AVR-PikD	19	3	170317
A	Pikp-1:ancHMA+Pikp-2+AVRblb2	19	3.5	170317
A	Pikp-1:ancHMA+ev+AVRblb2	19	0	170317
A	Pikp-1+Pikp-2+AVRblb2	19	1	170317
A	Pikp-1:ancHMA-PI+Pikp-2+AVR-PikD	19	2	170317
A	Pikp-1:ancHMA-PI+Pikp-2+AVRblb2	19	2	170317
A	Pikp-1:ancHMA-PI+ev+AVRblb2	19	0	170317
A	Pikp-1+Pikp-2+AVR-PikD	20	2	170317
A	Pikp-1:ancHMA+Pikp-2+AVR-PikD	20	2	170317
A	Pikp-1:ancHMA+Pikp-2+AVRblb2	20	2	170317
A	Pikp-1:ancHMA+ev+AVRblb2	20	0	170317
A	Pikp-1+Pikp-2+AVRblb2	20	0	170317
A	Pikp-1:ancHMA-PI+Pikp-2+AVR-PikD	20	1	170317
A	Pikp-1:ancHMA-PI+Pikp-2+AVRblb2	20	2	170317
A	Pikp-1:ancHMA-PI+ev+AVRblb2	20	0	170317
A	Pikp-1+Pikp-2+AVR-PikD	21	3	170317
A	Pikp-1:ancHMA+Pikp-2+AVR-PikD	21	3	170317
A	Pikp-1:ancHMA+Pikp-2+AVRblb2	21	3	170317
A	Pikp-1:ancHMA+ev+AVRblb2	21	0	170317
A	Pikp-1+Pikp-2+AVRblb2	21	0	170317
A	Pikp-1:ancHMA-PI+Pikp-2+AVR-PikD	21	1	170317
A	Pikp-1:ancHMA-PI+Pikp-2+AVRblb2	21	1	170317
A	Pikp-1:ancHMA-PI+ev+AVRblb2	21	0	170317
A	Pikp-1+Pikp-2+AVR-PikD	22	3	170317
A	Pikp-1:ancHMA+Pikp-2+AVR-PikD	22	2	170317
A	Pikp-1:ancHMA+Pikp-2+AVRblb2	22	3	170317
A	Pikp-1:ancHMA+ev+AVRblb2	22	0	170317
A	Pikp-1+Pikp-2+AVRblb2	22	0	170317
A	Pikp-1:ancHMA-PI+Pikp-2+AVR-PikD	22	1	170317
A	Pikp-1:ancHMA-PI+Pikp-2+AVRblb2	22	2	170317
A	Pikp-1:ancHMA-PI+ev+AVRblb2	22	0	170317
A	Pikp-1+Pikp-2+AVR-PikD	23	3.5	170317
A	Pikp-1:ancHMA+Pikp-2+AVR-PikD	23	3.5	170317
A	Pikp-1:ancHMA+Pikp-2+AVRblb2	23	3.5	170317
A	Pikp-1:ancHMA+ev+AVRblb2	23	0	170317
A	Pikp-1+Pikp-2+AVRblb2	23	0	170317
A	Pikp-1:ancHMA-PI+Pikp-2+AVR-PikD	23	3	170317
A	Pikp-1:ancHMA-PI+Pikp-2+AVRblb2	23	3	170317
A	Pikp-1:ancHMA-PI+ev+AVRblb2	23	0	170317
A	Pikp-1+Pikp-2+AVR-PikD	24	3	170317
A	Pikp-1:ancHMA+Pikp-2+AVR-PikD	24	3	170317
A	Pikp-1:ancHMA+Pikp-2+AVRblb2	24	3.5	170317
A	Pikp-1:ancHMA+ev+AVRblb2	24	0	170317
A	Pikp-1+Pikp-2+AVRblb2	24	0	170317
A	Pikp-1:ancHMA-PI+Pikp-2+AVR-PikD	24	3	170317
A	Pikp-1:ancHMA-PI+Pikp-2+AVRblb2	24	3	170317
A	Pikp-1:ancHMA-PI+ev+AVRblb2	24	0	170317
A	Pikp-1+Pikp-2+AVR-PikD	25	2	170317
A	Pikp-1:ancHMA+Pikp-2+AVR-PikD	25	2	170317
A	Pikp-1:ancHMA+Pikp-2+AVRblb2	25	2	170317
A	Pikp-1:ancHMA+ev+AVRblb2	25	0	170317
A	Pikp-1+Pikp-2+AVRblb2	25	0	170317
A	Pikp-1:ancHMA-PI+Pikp-2+AVR-PikD	25	2	170317
A	Pikp-1:ancHMA-PI+Pikp-2+AVRblb2	25	2	170317
A	Pikp-1:ancHMA-PI+ev+AVRblb2	25	0	170317
A	Pikp-1+Pikp-2+AVR-PikD	26	1.5	170317
A	Pikp-1:ancHMA+Pikp-2+AVR-PikD	26	1.5	170317
A	Pikp-1:ancHMA+Pikp-2+AVRblb2	26	2	170317
A	Pikp-1:ancHMA+ev+AVRblb2	26	0	170317
A	Pikp-1+Pikp-2+AVRblb2	26	0	170317
A	Pikp-1:ancHMA-PI+Pikp-2+AVR-PikD	26	2	170317
A	Pikp-1:ancHMA-PI+Pikp-2+AVRblb2	26	2	170317
A	Pikp-1:ancHMA-PI+ev+AVRblb2	26	0	170317
A	Pikp-1+Pikp-2+AVR-PikD	27	3.5	170317
A	Pikp-1:ancHMA+Pikp-2+AVR-PikD	27	3	170317
A	Pikp-1:ancHMA+Pikp-2+AVRblb2	27	3	170317
A	Pikp-1:ancHMA+ev+AVRblb2	27	0	170317
A	Pikp-1+Pikp-2+AVRblb2	27	0	170317
A	Pikp-1:ancHMA-PI+Pikp-2+AVR-PikD	27	1	170317
A	Pikp-1:ancHMA-PI+Pikp-2+AVRblb2	27	1	170317
A	Pikp-1:ancHMA-PI+ev+AVRblb2	27	0	170317
A	Pikp-1+Pikp-2+AVR-PikD	28	3.5	170317
A	Pikp-1:ancHMA+Pikp-2+AVR-PikD	28	3	170317
A	Pikp-1:ancHMA+Pikp-2+AVRblb2	28	3	170317
A	Pikp-1:ancHMA+ev+AVRblb2	28	0	170317
A	Pikp-1+Pikp-2+AVRblb2	28	0	170317
A	Pikp-1:ancHMA-PI+Pikp-2+AVR-PikD	28	1	170317
A	Pikp-1:ancHMA-PI+Pikp-2+AVRblb2	28	3	170317
A	Pikp-1:ancHMA-PI+ev+AVRblb2	28	0	170317
B	Pikp-1+Pikp-2+AVR-PikD	1	3.5	190830
B	Pikp-1+Pikp-2+AVRblb2	1	0	190830
B	Pikp-1:ancHMA-PI+Pikp-2+AVR-PikD	1	2	190830
B	Pikp-1:ancHMA-PI+Pikp-2+AVRblb2	1	2	190830
B	Pikp-1:ancHMA-PI+ev+AVRblb2	1	0	190830
B	Pikp-1+Pikp-2+AVR-PikD	2	3.5	190830
B	Pikp-1+Pikp-2+AVRblb2	2	0	190830
B	Pikp-1:ancHMA-PI+Pikp-2+AVR-PikD	2	1.5	190830
B	Pikp-1:ancHMA-PI+Pikp-2+AVRblb2	2	1.5	190830
B	Pikp-1:ancHMA-PI+ev+AVRblb2	2	0	190830
B	Pikp-1+Pikp-2+AVR-PikD	3	4	190830
B	Pikp-1+Pikp-2+AVRblb2	3	0	190830
B	Pikp-1:ancHMA-PI+Pikp-2+AVR-PikD	3	2	190830
B	Pikp-1:ancHMA-PI+Pikp-2+AVRblb2	3	3	190830
B	Pikp-1:ancHMA-PI+ev+AVRblb2	3	0	190830
B	Pikp-1+Pikp-2+AVR-PikD	4	4	190830
B	Pikp-1+Pikp-2+AVRblb2	4	0	190830
B	Pikp-1:ancHMA-PI+Pikp-2+AVR-PikD	4	2	190830
B	Pikp-1:ancHMA-PI+Pikp-2+AVRblb2	4	3	190830
B	Pikp-1:ancHMA-PI+ev+AVRblb2	4	0	190830
B	Pikp-1+Pikp-2+AVR-PikD	5	4	190830
B	Pikp-1+Pikp-2+AVRblb2	5	0	190830
B	Pikp-1:ancHMA-PI+Pikp-2+AVR-PikD	5	3	190830
B	Pikp-1:ancHMA-PI+Pikp-2+AVRblb2	5	3	190830
B	Pikp-1:ancHMA-PI+ev+AVRblb2	5	0	190830
B	Pikp-1+Pikp-2+AVR-PikD	6	4	190830
B	Pikp-1+Pikp-2+AVRblb2	6	0	190830
B	Pikp-1:ancHMA-PI+Pikp-2+AVR-PikD	6	2.5	190830
B	Pikp-1:ancHMA-PI+Pikp-2+AVRblb2	6	2	190830
B	Pikp-1:ancHMA-PI+ev+AVRblb2	6	0	190830
B	Pikp-1+Pikp-2+AVR-PikD	7	4	190830
B	Pikp-1+Pikp-2+AVRblb2	7	0	190830
B	Pikp-1:ancHMA-PI+Pikp-2+AVR-PikD	7	2.5	190830
B	Pikp-1:ancHMA-PI+Pikp-2+AVRblb2	7	3	190830
B	Pikp-1:ancHMA-PI+ev+AVRblb2	7	0	190830
B	Pikp-1+Pikp-2+AVR-PikD	8	3.5	190830
B	Pikp-1+Pikp-2+AVRblb2	8	0	190830
B	Pikp-1:ancHMA-PI+Pikp-2+AVR-PikD	8	2	190830
B	Pikp-1:ancHMA-PI+Pikp-2+AVRblb2	8	2	190830
B	Pikp-1:ancHMA-PI+ev+AVRblb2	8	0	190830
B	Pikp-1+Pikp-2+AVR-PikD	9	4	190830
B	Pikp-1+Pikp-2+AVRblb2	9	0	190830
B	Pikp-1:ancHMA-PI+Pikp-2+AVR-PikD	9	2	190830
B	Pikp-1:ancHMA-PI+Pikp-2+AVRblb2	9	2	190830
B	Pikp-1:ancHMA-PI+ev+AVRblb2	9	0	190830
B	Pikp-1+Pikp-2+AVR-PikD	10	3.5	190830
B	Pikp-1+Pikp-2+AVRblb2	10	0	190830
B	Pikp-1:ancHMA-PI+Pikp-2+AVR-PikD	10	2	190830
B	Pikp-1:ancHMA-PI+Pikp-2+AVRblb2	10	3	190830
B	Pikp-1:ancHMA-PI+ev+AVRblb2	10	0	190830
B	Pikp-1+Pikp-2+AVR-PikD	11	4	190830
B	Pikp-1+Pikp-2+AVRblb2	11	0	190830
B	Pikp-1:ancHMA-PI+Pikp-2+AVR-PikD	11	3	190830
B	Pikp-1:ancHMA-PI+Pikp-2+AVRblb2	11	3	190830
B	Pikp-1:ancHMA-PI+ev+AVRblb2	11	0	190830
B	Pikp-1+Pikp-2+AVR-PikD	12	3.5	190830
B	Pikp-1+Pikp-2+AVRblb2	12	0	190830
B	Pikp-1:ancHMA-PI+Pikp-2+AVR-PikD	12	1	190830
B	Pikp-1:ancHMA-PI+Pikp-2+AVRblb2	12	1	190830
B	Pikp-1:ancHMA-PI+ev+AVRblb2	12	0	190830
B	Pikp-1+Pikp-2+AVR-PikD	13	4.5	190830
B	Pikp-1+Pikp-2+AVRblb2	13	0	190830
B	Pikp-1:ancHMA-PI+Pikp-2+AVR-PikD	13	2	190830
B	Pikp-1:ancHMA-PI+Pikp-2+AVRblb2	13	2.5	190830
B	Pikp-1:ancHMA-PI+ev+AVRblb2	13	0	190830
B	Pikp-1+Pikp-2+AVR-PikD	14	4	190830
B	Pikp-1+Pikp-2+AVRblb2	14	0	190830
B	Pikp-1:ancHMA-PI+Pikp-2+AVR-PikD	14	1	190830
B	Pikp-1:ancHMA-PI+Pikp-2+AVRblb2	14	3	190830
B	Pikp-1:ancHMA-PI+ev+AVRblb2	14	0	190830
B	Pikp-1+Pikp-2+AVR-PikD	15	4	190830
B	Pikp-1+Pikp-2+AVRblb2	15	0	190830
B	Pikp-1:ancHMA-PI+Pikp-2+AVR-PikD	15	1.5	190830
B	Pikp-1:ancHMA-PI+Pikp-2+AVRblb2	15	1.5	190830
B	Pikp-1:ancHMA-PI+ev+AVRblb2	15	0	190830
B	Pikp-1+Pikp-2+AVR-PikD	16	3.5	190830
B	Pikp-1+Pikp-2+AVRblb2	16	0	190830
B	Pikp-1:ancHMA-PI+Pikp-2+AVR-PikD	16	1	190830
B	Pikp-1:ancHMA-PI+Pikp-2+AVRblb2	16	1	190830
B	Pikp-1:ancHMA-PI+ev+AVRblb2	16	0	190830
B	Pikp-1+Pikp-2+AVR-PikD	17	4	190830
B	Pikp-1+Pikp-2+AVRblb2	17	0	190830
B	Pikp-1:ancHMA-PI+Pikp-2+AVR-PikD	17	1	190830
B	Pikp-1:ancHMA-PI+Pikp-2+AVRblb2	17	1	190830
B	Pikp-1:ancHMA-PI+ev+AVRblb2	17	0	190830
B	Pikp-1+Pikp-2+AVR-PikD	18	3.5	190830
B	Pikp-1+Pikp-2+AVRblb2	18	0	190830
B	Pikp-1:ancHMA-PI+Pikp-2+AVR-PikD	18	2	190830
B	Pikp-1:ancHMA-PI+Pikp-2+AVRblb2	18	2	190830
B	Pikp-1:ancHMA-PI+ev+AVRblb2	18	0	190830
B	Pikp-1+Pikp-2+AVR-PikD	19	4	190830
B	Pikp-1+Pikp-2+AVRblb2	19	0	190830
B	Pikp-1:ancHMA-PI+Pikp-2+AVR-PikD	19	2	190830
B	Pikp-1:ancHMA-PI+Pikp-2+AVRblb2	19	2	190830
B	Pikp-1:ancHMA-PI+ev+AVRblb2	19	0	190830
B	Pikp-1+Pikp-2+AVR-PikD	20	3	190830
B	Pikp-1+Pikp-2+AVRblb2	20	0	190830
B	Pikp-1:ancHMA-PI+Pikp-2+AVR-PikD	20	2	190830
B	Pikp-1:ancHMA-PI+Pikp-2+AVRblb2	20	2	190830
B	Pikp-1:ancHMA-PI+ev+AVRblb2	20	0	190830
B	Pikp-1+Pikp-2+AVR-PikD	21	3.5	190830
B	Pikp-1+Pikp-2+AVRblb2	21	0	190830
B	Pikp-1:ancHMA-PI+Pikp-2+AVR-PikD	21	2	190830
B	Pikp-1:ancHMA-PI+Pikp-2+AVRblb2	21	3	190830
B	Pikp-1:ancHMA-PI+ev+AVRblb2	21	0	190830
B	Pikp-1+Pikp-2+AVR-PikD	22	3.5	190830
B	Pikp-1+Pikp-2+AVRblb2	22	0	190830
B	Pikp-1:ancHMA-PI+Pikp-2+AVR-PikD	22	2	190830
B	Pikp-1:ancHMA-PI+Pikp-2+AVRblb2	22	2	190830
B	Pikp-1:ancHMA-PI+ev+AVRblb2	22	0	190830
B	Pikp-1+Pikp-2+AVR-PikD	23	3.5	190830
B	Pikp-1+Pikp-2+AVRblb2	23	0	190830
B	Pikp-1:ancHMA-PI+Pikp-2+AVR-PikD	23	1.5	190830
B	Pikp-1:ancHMA-PI+Pikp-2+AVRblb2	23	2	190830
B	Pikp-1:ancHMA-PI+ev+AVRblb2	23	0	190830
B	Pikp-1+Pikp-2+AVR-PikD	24	4	190830
B	Pikp-1+Pikp-2+AVRblb2	24	0	190830
B	Pikp-1:ancHMA-PI+Pikp-2+AVR-PikD	24	1	190830
B	Pikp-1:ancHMA-PI+Pikp-2+AVRblb2	24	1	190830
B	Pikp-1:ancHMA-PI+ev+AVRblb2	24	0	190830
