# Supplementary material for: Two NLR immune receptors acquired high-affinity binding to a fungal effector through convergent evolution of their integrated domain
Source: eLife. 2021 Jul 21;10:e66961. doi: 10.7554/eLife.66961 (PMC8294853; doi:10.7554/eLife.66961)
Supplement: Supplementary file 2. [file elife-66961-supp2.xlsx]

## Sheet: SuppFile_01
		NLR-parser results							Length	HMMER search results					Length filtering					Phylogeny
species	accession	class	complete	start	end	NBARC	NBLRR Signal	MotifList	> 750 aa	NBARC (evalue)	LRR8 (evalue)	LRR5 (evalue)	LRR1 (evalue)	LRR3 (evalue)	length of N-terminus	length of NBARC	length of C-terminus	N-terminus < 60aa	C-terminus < 60 aa	included in NLR phylogeny	Pik-1 related	Pik-2 related
Sorghum bicolor	EER89108	CNL	partial	EER89108:119	EER89108:680	ESSNTGPRVVSLVGMGGIGKTTLTKKVFDSNDLSDKFGTRAWITVSQSFEQKEIFKEMVKHLFGAELLHKLLEDHQGQQYLIVLDDVWTIDAWNRIKVTFQDSGKDDSCVVVTTRNQTLAKYCSPPSHIHQPDFLGKEEARTLFLKKTNRSLDELEKGDKTKGIVEKILNKCGGLPLAILTIGAVLANKDTEEWENIYMQLPWDLANNPSL	no	16,1,6,4,5,10,3,12,2,8,7,9,9	yes	7.3e-46	0.0048	NA	NA	NA	210	372	406	no	no	yes	NA	NA		NA - Not Applicable
Sorghum bicolor	EER89230	CNL	complete	EER89230:15	EER89230:904	MEDDPRLRVLSIVGFGGLGKTTLARMVCESPVVKGADFQCCPLFIVSQTFNVRNLFQHMIRELIQRPHEAMAIAGGKYGHFTEETLEGIERLGIAVLAEKLRRYLQDKRYIMILDDIWTISSWESIRCALPDNMKGSRVIITTRNEDVAKTCCSHPQDWIYKIQRLSDATSRELFFKRIFGSADKLPHDELEEVSNSILKKCGGLPLAIMS	no	17,16,1,6,4,5,10,3,12,2,8,7,11,9,9,11	yes	5.3e-50	0.00071	NA	NA	NA	178	397	379	no	no	yes	NA	NA
Sorghum bicolor	EER89624	CNL	complete	EER89624:15	EER89624:896	HANHGIHQVISVVGMGGLGKTTLVRKVFHSIDIVENFSSRAWITVSQSFDKKELLKELIKQLFGDGSSKEHSRELENNKVSGLQSKKVDGLMDVLMQGLEDKRYFVVLDDLWKIDDWNWIKTTAFPKSNKKGSRILVTTRDASLAKLCASIAGSFHSLVYCLEPLQDHHAKELLLKKTNRSHQALKIGEAEHIFDMILKKCAGLPLAIVTI	no	17,16,1,6,4,5,10,3,12,2,8,7,11,9,11	yes	1.1e-43	0.0007	NA	NA	NA	163	392	463	no	no	yes	NA	NA
Sorghum bicolor	EER91059	CNL	complete	EER91059:11	EER91059:1006	SKSNNVVVAVAITGMGGIGKTTLARMVFNDNKIEENFEDRIWLSVNQEVNEISVLQSVLASFGANQNHEGFAGNKDLLERALMKMVEQKKKFLLVMDDVWGEKVWNDLLRVPLSYGAPGSRVLVTTRNDEVARGINAQHLHRVDKLQTEDAWVLLKNQVVLNESDDGYVNELKGIGIKIVENCDCLPLAVKVLGGVLRRKSKTRDTWTDIC	no	17,16,1,6,4,5,10,3,12,2,8,7,9,9,11,9,19,11,11,11	yes	1.5e-48	6.4e-07	NA	NA	NA	187	381	531	no	no	yes	NA	NA
Sorghum bicolor	EER92539	CNL	partial	EER92539:179	EER92539:874	RFLGDCDAALGVWGAGGVGKTTVLKLVREVCGRVARFDHVLLVAASRDCTVAKLQREVVSVLGLRDAATEQAQAAGILSFLREKSFLLLLDGVSERLDLERVGIPQPLGMVNGKVRKIIVASRSEALCADMGCRKKIKMEGFNEEDAWSLFQANVGGDTIHGHTQIPALARQVAAECKCLPLALVTVGRAMSNKRTPEEWSNALDTLKASL	no	1,6,4,5,10,3,12,2,7,9,11,11,11,11	yes	2e-36	1.5e-11	NA	0.0023	NA	160	383	368	no	no	yes	NA	NA
Sorghum bicolor	EER93136	CNL	complete	EER93136:11	EER93136:991	TSSGNVTVSAVITGAGGIGKTTLARMVFNDGKVEQSFDERIWLSINKGVDHLSVLRNVVAALHGGSYGGGGSAASDSRALLECALKQAARRKKLLVVMDDVWSEDVWSGLLRAPLADAAAPGSRVLVTTRNEVVARKMNARHLHRVGKLEGDDAWVLLKKQVVSDEIDEVEVDGLLKDVGMMIVEKCQGLPLAIKVLGGHLFHIRKTRDAW	no	17,16,1,6,4,5,10,3,12,2,8,7,9,9,11,9,11,11	yes	2.4e-44	4.8e-12	NA	NA	NA	181	389	530	no	no	yes	NA	NA
Sorghum bicolor	EER93869	CNL	partial	EER93869:175	EER93869:1263	LGSEENLSIICIVGLGGIGKTTLAKLVFNDSRMQDFDRKAWIHVSQRFDLGRIGKAIISQFEGTAATFDNLQSLYNHIENLCSGKRCLVVLDDLWESNIEMLRKLKLLLRCGKNGSLVKVIVTTRNEEISQEMSTFGSYKLGPLSDDSCWTIFRQVAFQQTYEENLHALEAVGRDIAKKCKGLPLAAHAVGSMLRNRTVDFWKATRDNNAW	no	1,6,4,5,10,3,12,2,7,9,11,11,9,11,11,11,9,11,11,11,11,11,11,11,11,11	yes	3.8e-45	8.8e-28	NA	6.3e-08	NA	355	398	543	no	no	yes	NA	NA
Sorghum bicolor	EER94459	CNL	complete	EER94459:20	EER94459:868	SDLQQQSVITTVWGMGGVGKTTLVAHVYNTVKVDFDSTAWITVSKAYQMEDLLKQIIRGFQKSDLKGELRVDIIDMEKRNLVEIIRDYLRGKRYLLVLDDVWGIDIWFKISDAFPTNSTSRFIITSRIHEVALLANGNCIIELKPLEAHHSWELFCKEAFWKNENKMCPLELNNLAQRFVDKCNGLPIAIACIGRLLSCRSPTYSDWESLY	no	17,16,1,6,4,5,10,3,12,2,8,7,9,9,9,11,11	yes	5.4e-50	2.7e-06	NA	NA	NA	174	374	370	no	no	yes	NA	NA
Sorghum bicolor	EER94930	CNL	partial	EER94930:25	EER94930:839	FSDSTEMGVISIWGTAGIGKTALAQSVCKDPQVQNFFTDKIWVWLPDRCDVRKATKMIIEAVTSKKCELLSLDILQQRLHDHLHKKHFLLVIDNLWAEGFQFWEFMRPSLTGGADGSKVLITTQHERVSRMSSTILNIHLERMEDEECWQILKLYAFLGWSSRDQHDLESIGRRIATNCQGSPLAAKSLGVLLSDTHGDREQWESILGEMQ	no	17,1,6,4,5,10,3,12,2,8,7,9,9,11,11,11	yes	5.5e-39	5.2e-08	NA	NA	NA	186	370	349	no	no	yes	NA	NA
Sorghum bicolor	EER95860	CNL	complete	EER95860:15	EER95860:635	GKQDQELNIMAIVGFGGLGKTTLAMQVYSKLKDKFDCTAFVSVSRGPSIKKILIDLLKDVGAAIDTTDDEMRLINKLREYLMKRRYFVVIDDLWDVSAWSFIKCAFYQNNCGSRIIVTTRKIDVAKACCFSSGDHIYEMQPLSVADSERLFFKRIFGSEERCPSHLKEASIKILRKCGGLPLAIITISSLLASKDLTLDQWNRVANSIGST	no	17,16,1,6,4,5,10,3,12,2,8,7,11,9,9	yes	1e-46	1.3e-07	NA	NA	NA	165	379	388	no	no	yes	NA	NA
Sorghum bicolor	EER95978	CNL	complete	EER95978:20	EER95978:851	SDLRKDRTVISICGMGGLGKTTIASSIYKKEEIKRMFICRAWISVSQSYRVKDLLQKLLLQLISKNENIPDGLDTMDCVNLVELLRRYLKDRKYLIVLDDVWSRDSWPLLDSAFVKNDNGSRIIVTTRIQAVASVADSNREMKLSLLPKEEAWTLFCQKAFTRLDDRSCPLSLKTCAERIVGKCQGLPLALVALGSLLSYKEMDEHEWELF	no	17,16,1,6,4,5,10,3,2,8,7,9,9,11,11,11,11	yes	3.4e-55	8.9e-08	NA	NA	NA	177	366	350	no	no	yes	NA	NA
Sorghum bicolor	EER95995	CNL	partial	EER95995:14	EER95995:263	HDKDSHRAVLSIVGFGGVGKTTIATALYRNFRNEFECRASVTVSQNYDEDEVLRDILGQIKPRDSEREQQDHDTGKLEKNLAAAMKGLVKRVVPLSCGHKKHGNGGSTQWTQNKIDTMTRDQLIGELKWRLNGK	no	17,16,14,1,6	NA	2e-15	NA	NA	NA	NA	NA	NA	NA	NA	NA	NA	NA	NA
Sorghum bicolor	EER96000	CNL	partial	EER96000:14	EER96000:736	LTKESHRAVISIVGFGGVGKTTIATKLYQDFGNEFDCRASVTVSQNYDEDQVLRDILGQIKPRDKEQGNNNDSSSTIQQVNNSKDQVIMTRDDQAQQDRNTAGTPPAEKNQLLAYGMKGFVKRVIMPLRGHRKQGNDGNAGCTQSNIETMAHDKLIQELRSRLKGKRYILLIDDVWSVETWENIRNWLPHENGSKVIVTSRFQAVGAACSE	no	17,16,1,6,4,5,10,3,12,2,8,7,9,9	yes	1.1e-44	1.3e-05	NA	NA	NA	189	454	389	no	no	yes	NA	yes
Sorghum bicolor	EER96524	CNL	complete	EER96524:77	EER96524:1504	EYSHKNLTVLPIVGPGGIGKTTFTQHIYKKLHDHFEVKLWVCVSVNFSASRLTQEVADKIKKEGNASPESRIEEGIKSKRFLLVLDDMWSCSNEDEWKRFLVPFDKGQKEGSVILVTTRFPALAQMVKTTHNPMMELKGIDEEEFEKLFLAYVFGNNGPTQDQSKLLDSGREIIKKLKGSPLAAKTVGRLLRNHLDLGHWTRVLESREWES	no	16,1,6,4,5,10,3,12,2,8,7,11,11,11,11,11,11,11,11	yes	3.9e-34	0.0083	NA	NA	NA	369	385	786	no	no	yes	NA	NA
Sorghum bicolor	EER96728	NA	partial	EER96728:607	EER96728:1157	NA	no	9,11,11,11,9,11,11,11,11,11	yes	NA	3.1e-10	NA	NA	NA	NA	NA	NA	NA	NA	NA	NA	NA
Sorghum bicolor	EER97218	CNL	partial	EER97218:5	EER97218:930	TERKSPNKAIIIVGDSGMGKTTLARKIHDDHRTRNAFTIVVWVSVFNNLDDIGLLSAIVKAAGGNPSGEENRVQLEAMLAAILKGKRFFMVLDDVRSNQIYENSLEAHLHVCGHGSRILITTRDESISTQMKDAYIYRVKNFTFQDCWSLLCQSSCLDESLHGDILRNIGIAIIQKCNKLPMAAKIIGAVLRTKEPTCEAWQRVYESEGWS	no	3,1,6,4,5,10,3,12,2,8,7,9,9,11,9,11,11,11,11,11,11	yes	4.1e-38	2.1e-08	NA	NA	NA	161	366	589	no	no	yes	NA	NA
Sorghum bicolor	EER97299	CNL	complete	EER97299:19	EER97299:886	VQSSKQFSVIAVIGPAGVGKTTLAQVIYNNPNAKEDFALRGWVMASRRNRNKQDIAKDIVDSFGMEQQDSLQTGPSESALSSTIENKRFFLVLDDVQDNLRELWGSLSSTLKGAANGSVVLLTTQSKEDAYIFRTTAQVSLDHLSFQIMCRVFEHHAFGKQKKASLESIGKKIVQNLHGLPLLAEAIGRLLRQKLDEGHWQNISENPWWLF	no	17,16,1,4,5,10,3,2,8,9,9,2,11,11	yes	6e-28	4.5e-08	NA	NA	NA	175	371	448	no	no	yes	NA	NA
Sorghum bicolor	EER97636	CNL	complete	EER97636:74	EER97636:651	NPPAERRRVVAIVGSGGSGKTTLAKQVYEKIRDQFSCAAFVSVSQKPNMISLLWELLSQIGSHGGDLGLMAIGSCSEKQLIDRLRSDLENQRYLVVIDDVWTKSAWEIIQCALPNNGHTSKVIMTTRINSVGQFSSTSDEGFIYQMKPLSRNDSENLFLKRTLCAEDKFPVQLTGIKNEIIEKCDGLPLAIVTLASMLATKPRTEEEWERA	no	16,1,6,4,5,10,3,12,2,8,7,11,9,9	yes	4e-46	0.00018	NA	NA	NA	173	386	379	no	no	yes	NA	NA
Sorghum bicolor	EER98120	CNL	complete	EER98120:19	EER98120:949	EKNTPQLKMASILGFPGVGKTTLARLVYEAIKDKFQARAFVSITSCQNMMEVLASILQQVTSESTDVLLAGTKAATKNEHLIDIISSFLKDKRYLVIIDDIWHSGEWETIKKSLPDNDLGSRIVTTSRVNAITDKWRDDFDALVYQIDGLWRAPFHYQMIDMYAGMVGEDFGRYHPIVTMCRGMPLAFACMFSALTKERERQEQQRLCIET	no	17,16,1,6,4,5,3,12,2,8,11,9,11,11,11,9,11,9,9	yes	4.9e-29	2.1e-23	NA	6.3e-08	NA	179	380	528	no	no	yes	yes	NA
Sorghum bicolor	EER98121	CNL	complete	EER98121:77	EER98121:966	EENTPELKMAAILGAAGMGKTTLARLVYEAIEDKFDARAFVSITSCHNMTEVLASILRQVAADDDSTAVLLGGTKAVTGEYLIGIISNFLKDKRYLVIIDDIWNCEEWGTIKKSLPDNNLGSRILTTSRVNAITDKWRDDFDTLAHKIGNSGDWDGSAFTSKMIDRNGNMFGEGFQLGHDIVKMCRGTPLAVACLVSALAKERERREQQGL	no	16,1,6,4,5,3,12,2,8,7,9,9,11,9,9,11,9,9,9,9,9	yes	2.6e-30	4.1e-26	NA	0.0027	NA	182	379	539	no	no	yes	yes	NA
Sorghum bicolor	EER98125	CNL	complete	EER98125:17	EER98125:873	ESTVRQLKMACIVGGVGMGKTTLARLVYEAIQHRFQARAFVSVNSSHSMMGVLAAILQQVTADSTDDVVLLAGTKASTKNKHPIDIISSFLKDKRYLVIVDDIWHYGEWETIKKSLPDNNLGSRIVMTSRVKSVTEKWHDDFGALVYELDRHHSWQMYGPADPTTHKLIRMNADMIGEGFDCDHDIVNMCRGIPLAVSCMISALSKERERQ	no	17,16,1,6,4,5,3,12,2,8,7,9,11,9,11,9,11,9,11,9	yes	2.7e-29	2.6e-24	NA	0.0079	NA	184	383	585	no	no	yes	yes	NA
Sorghum bicolor	EER98159	NA	partial	EER98159:49	EER98159:137	NA	no	18,15	NA	NA	NA	NA	NA	NA	NA	NA	NA	NA	NA	NA	NA	NA
Sorghum bicolor	EER98181	CNL	complete	EER98181:15	EER98181:1132	ISKQGEPMVISVWGMGGLGKTTLVKEIYGSQELSGLFEKRACVTIMRPFILKDVLDSLCMQLDPESYNRKGNDFGLLRRKIADNEAPIEESGKLGRKVTDEEVLFEKLDNLLKGKRFLIVLDDLSSLGEWDVIIQSLPKMNSTCRIVITTREENIARHCSEKQEHIYKLQVLEDSAALDLFTKKVFKEAINLDEYPTLIEEAKMILKKCKG	no	17,16,6,4,5,1,6,4,5,10,3,12,2,8,7,11,11,9,9	yes	4.8e-60	0.00027	NA	NA	NA	408	407	432	no	no	yes	NA	NA
Sorghum bicolor	EER98470	CNL	partial	EER98470:15	EER98470:756	QDGAPQLKVVSILGTGGIGKTTLANQVYTAIKGKFDYTAFVSVSRIPDLAQVLSDIIVQSRWYSRRQDGENKLISDLRERLQDKRYLIVIDDMWTIEAWNTIKCCFVENNRGSRVITTTRIEDTAKSCCSSFHGYVYRMEPLSDVDSRILFYRRIFHSEDACPEHLKCVSNEILKKCGGLPLAILTIGSILASHQEVGSTEIWEKIMHSLR	no	17,16,14,1,6,4,5,10,3,12,2,8,7,9,9	yes	5.9e-41	NA	NA	NA	NA	159	375	390	no	no	yes	NA	NA
Sorghum bicolor	EER98716	CNL	complete	EER98716:202	EER98716:894	EGHQQNLKVVSIVGSGGIGKTTVAMELYRKLGHQFDCRAFVRTSQEPDMRRIFVSMLSQIGPHQPPDNWTIHSLISTIRAHLRDKRYLIVVEDLCATSTWDIVKRALPDTNCCSRILTTTEIEDLALQSCDHDPKYVYKMKPLGEDDSRTLFFSSIFGPQHECHSELREISHAIISKCGGLPLAIVTVAGVLSSKPGLADQWDYVNKSIGY	no	16,1,6,4,5,10,3,12,2,8,11	yes	8.3e-37	0.00098	NA	NA	NA	333	380	871	no	no	yes	NA	NA
Sorghum bicolor	EER98750	CNL	complete	EER98750:78	EER98750:836	QINVKELTIISIVGPVGLGKTSLAQLIFNDARAEAFRFRIWVHISMGNVNLEKIGRDIVLQTTERVEGSMQMQSIKNAVQDILNRYSCLIVLDSLWGKYEEVNELKQMLLTGRKTESKIIVTTHSSKVAELISTVPPYKLPLLSEDDCSTIFSQRAMAGHNDPLFREYGEEIVRRCEGIPLVANFLGSVVNAQRQRREIWIAAKDKDMWKI	no	16,1,5,10,3,2,8,7,9,9,9,9,11,11,11,9,11,11	yes	7.8e-28	4.1e-15	NA	0.00013	NA	172	380	507	no	no	yes	NA	NA
Sorghum bicolor	EER98752	CNL	partial	EER98752:66	EER98752:1506	QSNAEKLSIIPIVGLVGLGKTTLARLIFLDQGEGWNFDLRIWICLNRKLNIKMIASDIISQCNHTEEKFLDVHTGMEIQENLQLLKNCLQEALREKHCLIVLDDLSSTDKNQLDELKEMLKGTNESIKVLVTTSSEITAELVYTIPPYKLCPLSEDDSWKIFSQKAFGNCNSDNTDLKRIGKEIVKRCEGIPLLTHSLGLVVQNQVTNVWL	no	16,1,6,4,5,10,2,7,9,9,9,11,11,11,11,11,11,9,11,9,19,11,11,6	yes	3e-33	1.3e-23	NA	2.7e-08	NA	158	389	1126	no	no	yes	NA	NA
Sorghum bicolor	EER99561	NA	partial	EER99561:68	EER99561:156	NA	no	18,15	NA	NA	NA	NA	NA	NA	NA	NA	NA	NA	NA	NA	NA	NA
Sorghum bicolor	EER99791	CNL	partial	EER99791:169	EER99791:651	ENEQKELKVVSIHGRGGHGKTVLAKEIYGDICVKGQFECKAFVSVSRNSSTRTTLIEILRQVKSEVDASQSWSSNDEQINEIITELWGFLRTKRYFICIDDIRSTQDSDVIVCALPDNDLGSRILTTTRMEDIAISCSRRPDDVVYEMIPLDETDSKSLFCNSVYVQEEEWPDHFKESSKKMFEVCGGLPLAIIATAGFLGRTSAELSLQS	no	1,6,4,5,10,3,12,2,8,7,9,9	yes	7.2e-39	5.5e-05	NA	NA	NA	147	412	487	no	no	yes	NA	NA
Sorghum bicolor	EES01457	NA	partial	EES01457:100	EES01457:676	NA	no	9,11,11,11,11,11,11,11,11,11,11,3	yes	NA	2.8e-52	NA	1.6e-23	NA	NA	NA	NA	NA	NA	NA	NA	NA
Sorghum bicolor	EES01602	TNL	partial	EES01602:171	EES01602:392	ECGAGRLNGVGIVGMGGIGKTALAQLLFSSPRAKGRFFPRIWMCMSRTASAGADRRKEVLQGMLMALGHEEDAILSIDGSDSLAELVIAVHEQLKGKRYLIVFDDVWHIDSWYADVVGRQNAPRRTDDWSERLAFALPKERGGLVVVTSRLEQAAEAMVGKSCLYRVRPLADSESCWAIFTDALSQSQSQEKKTVDLATVNNMKQEILETC	no	1,4,5,3	NA	1.8e-29	NA	NA	NA	NA	NA	NA	NA	NA	NA	NA	NA	NA
Sorghum bicolor	EES01603	CNL	partial	EES01603:46	EES01603:849	LLVRPDVGVIVIQGIGGSGKTWAAKAAYRAAMTSNLFEEYVWVPLSMNCSMRQCINKIAASLSCNKGYNLSIERTKAIIKEHLTKRKFLLVLDNAYFTEESILECLGVPRPQQQSLGSKIIVTTRTGRGESAMEPDIVLMPQPLTYEESYDLLREKIGKDICFAHDLISYCFGMPLTIVLLAGVLCDAPTQEAFDELVAKAHVALGAHISV	no	1,5,10,3,12,2,7,9,11,11,11,11,11,11	yes	1.2e-23	4e-11	NA	NA	NA	40	345	512	TRUE	no	NA	NA	NA
Sorghum bicolor	EES02901	CNL	partial	EES02901:14	EES02901:641	AGGTNELKIVSIVGMAGSGKTTLANAVYRRLQADNTFQCSAFVSIGPKSDMVSKTVKDLLSNLGDRLRGGEDITQLIPRVREILEKKRYLIVIDDLWSSDQWGIIRCCFPDNSLGSSIITTTRNDALPTNHHCGSSKFVHNHKISLLSDNEAKELFLKKAFSSRNDYPQHLEDVFAKVLRRCGGLPLAVVSIATKLAHKQSRDEWEKHGLN	no	17,16,14,1,4,5,10,3,12,2,8,7,9,9	yes	8.4e-44	NA	NA	NA	NA	173	379	261	no	no	yes	NA	NA
Sorghum bicolor	EES02942	CNL	complete	EES02942:16	EES02942:1409	RANFAELTVLPIVGMGGLGKTTLAQLIYNHPDVKKHFELCKWVCVSDEFDVFKLANKICNKSEKNLEEAQKTLQNELKGKRYLIVLDDVWNEDSDKWEKLKASLKHGGNGCAVLTTTRKEGVAKLMGTVKAHDIVLLDAEAIKKIIETKAFGSQEKRPTELLVLVDGIVERCAGSPLAANALGSVLRGKTSPEEWKAVQSKSIAHNKEDKI	no	17,16,1,6,4,5,3,12,2,8,7,9,11,11,11,11,11,11,11,11,11,11,11,11,11,11,11,11	yes	8.1e-47	0.00098	NA	0.0094	NA	177	376	891	no	no	yes	NA	NA
Sorghum bicolor	EES03739	CNL	partial	EES03739:10	EES03739:870	CVRDGGVGIVGIYGMAGVGKTALLNKFNNDFLINSHDINVAIYIEVGKDFDLNDIQRIIGDRLGVSWENRTPKERAGVLYRVLSKMNFVLLLDDVWEPLNFRMIGIPVPKHNSKSKIVLTTRIEDVCDRMDVRRKLRMDCLPWEPAWELFREKVGDHLMGASPEIRQQAQALAMKCGGLPLALITVGRAMASKRTAKEWKHAITVLKIAPW	no	17,1,4,5,10,3,12,2,7,11,9,9,9,11,11,11,11	yes	1.1e-49	1e-14	NA	NA	NA	152	372	383	no	no	yes	NA	NA
Sorghum bicolor	EES03756	CNL	partial	EES03756:70	EES03756:606	NA	no	17,12,2,8,7,11,11,11,19,11	NA	NA	0.00038	NA	0.021	NA	NA	NA	NA	NA	NA	NA	NA	NA
Sorghum bicolor	EES03777	CNL	complete	EES03777:13	EES03777:1062	GHNSCNVCVIPVVGMGGLGKTTLTQMVYHDDRVNEHFQLRIWVYVSESFDEKKITQETLEAAAYDQSFASTNMNMLQETLSRVLRGKRYLLVLDDVWNEDRDKWLSYRAALLSGGFGSKIVVTSRNENVGRIMGGIEPYKLQQLSDDDSWSVFKNHAFRDGDCSTYPQLEVIGRDIVKKLKGLPLSSKALGSLLFCKTDEEEWKGILRNDI	no	17,16,1,6,4,5,10,3,12,2,8,7,9,9,11,19,11,11,11,19,11,11,11,11	yes	7.8e-49	2.2e-11	NA	0.058	NA	171	367	574	no	no	yes	NA	NA
Sorghum bicolor	EES04130	CNL	complete	EES04130:8	EES04130:891	DDSVPARALVAIAGESSIGKTTLARKVYQSLEVRNHFEIRTWTVLPHKCRAADVLRDIHRQMTNQLRRAPSASKQAAEDACDGDKAFGSGKDISNQLHKSMTGRRYLVVVDGSVSVMDWNSLRASLPDEGNGSRVLLITDPDGLEVVGLGHAGHTYDPIVLTRLSPESTYEVFRRRVFGARGDCPGRYKSRYYQDVFRITRGLPLSIVVLA	no	17,16,1,6,4,10,3,12,2,8,7,9,9,9,11	yes	4.9e-30	0.0049	NA	NA	NA	175	400	360	no	no	yes	NA	NA
Sorghum bicolor	EES04264	TNL	partial	EES04264:128	EES04264:280	SSSTVSTSMLAITGARGVGKSTLLRLARTYYYQQRFFGYILYADAGQDGFTADALRGELARGVGWFRPPAAASTDHIATFLRSQSFLLLLDDVQAGGLGFDLADAGLPTTTTPLGPRQKVVFATRHESVCAAMGCADDEGNVIRMGCLGDDDAWNLFQYCVGGNIIDSNPMIKAIAKEMVGKCGGYPGALVRVGLSMSIHNQLESWIYADE	no	1,4,5,10	NA	2.5e-24	NA	NA	NA	NA	NA	NA	NA	NA	NA	NA	NA	NA
Sorghum bicolor	EES04374	CNL	complete	EES04374:89	EES04374:1042	ATVITSVPVLPIVGIGGVGKTTLAQTIYSNPQVQRHFDVIVWICVSDDFDVKRLTKEAIEQFSGKVPTKDNLNSLQADLADRLNNKRFLIVLDDMWDENRELWKTFYAPFKNVLEGSMMLVTTRSAKVSDIVRTMDPFLLEGLRDNVFQNFFKLCVFGSDSSTINPELEQIGKQILPKLKGSPLAAKTLGRLLGMSLDPAHWNMILNSQLW	no	16,1,6,4,5,3,12,2,8,7,11,11,11,11,11,11,11	yes	7.6e-41	0.0057	0.00093	NA	NA	180	394	501	no	no	yes	NA	NA
Sorghum bicolor	EES06297	NA	partial	EES06297:104	EES06297:622	NA	no	11,12,3,11,11,11,11,9,11,11,11,11	yes	NA	9.9e-39	0.017	4.1e-14	NA	NA	NA	NA	NA	NA	NA	NA	NA
Sorghum bicolor	EES06528	CNL	complete	EES06528:7	EES06528:664	DDGDRRLKVFSIVGFGGLGKTTLAVELCRQLDADFQCQALVSVSQAFDGDKDMKGLLGRVLHQIVKVKQDEAAKVHQMDVEHLYTKLKDLLRDKRYLIVIDDVWSLSAWEAIHVRLLENNCNSRVIVTTRIETVAKAASVSEDLVHHMKPLEPKASQELFIKRVFGSMGTCPNGLKEIMRKILKRCGGLPLAIVRIAGLLACYNSDESVEM	no	17,16,1,6,4,5,10,3,12,2,8,7,11,9	yes	1.8e-41	NA	NA	NA	NA	184	409	360	no	no	yes	NA	NA
Sorghum bicolor	EES07949	CNL	partial	EES07949:14	EES07949:522	GASLKELRVVSIVGFGGLGKTTLANEVYRDLRDNLSGNPEKSFSCKAIISVSQRPDMVNLLKSLFTKVSGQTADHTYDLPGLIDIVREYLQGKRYLLVIDDLWDPSAWEIIKCAFPESHCGSRVLTTTRIESVAVACCNYQWKFVYRMKPLDDYHSRQLFLRRIFGSGDRCPEPFEVLCEKILQKCGGLPLAIITIASLLASQQTRSIEQW	no	17,16,14,1,6,4,5,10,3,12,2,8,7	yes	4.5e-38	NA	NA	NA	NA	169	395	373	no	no	yes	NA	NA
Sorghum bicolor	EES08064	CNL	complete	EES08064:11	EES08064:915	VHEHKNVMVYAIVGVGGIGKTTLAKKIFNHDIIKQEYEKRIWLSVNKEFNDIDLLERAITEAQGDLQAARNTKAALERTLKEALKGCKTLLVMDDVWDPHVWEKVLEPPLINSLARGSRVLVTTRHDMVARGMMAEVPYHHVKKLEHEDAWSLLKKQVIGNGNNDEKNVDRLKEIGMEIIAKCDGLPLAVKVMGGLLRQKNTRQRDWEKIL	no	17,16,1,6,4,5,10,3,2,8,7,9,9,11,9,11,11,11,9	yes	1.5e-48	4.3e-06	NA	NA	NA	170	383	468	no	no	yes	NA	NA
Sorghum bicolor	EES08151	CNL	complete	EES08151:20	EES08151:863	DLEQRNSKITSVWGMGGVGKTTLVDHVYKSVKLDFDASAWVTVSKSYKVEDLLKKIATEFCMPVNSSTMNMRRLVDIIRRHLEGKRFILVLDDVWGKEVWINNIMPVFPANCTRRFVLTSRLSEVASLASSNCAMKLEPLQDQHSYMLFCKLAFWDNDDKRCPSELSDLVPKFLQKCEGLPIAIACLGRLLSCKPPTYTEWKILFDELELQ	no	17,16,1,6,4,5,10,3,12,2,8,7,11,9,9,9,11	yes	6.6e-49	0.00013	NA	NA	NA	176	368	382	no	no	yes	NA	NA
Sorghum bicolor	EES08153	CNL	complete	EES08153:20	EES08153:864	DLKEKNYKIATVWGMGGVGKTTLVDHVYKIVKLDFDAAAWVTVSQSYQVEDLLKRIAREFGIITDATNMEIRTLVEIIRKHLEGKRYILVLDDVWEKDVWINNIMEVFPTNCTSRFVLTSRKFDVASLAASNCRIELKPLGDQHSWELFCKAAFRNSDDKRCPSELQDLAAKFLQKCEGLPIAIACIGRLLSFKQPTHSDWDSVYKELELQ	no	17,16,1,6,4,5,10,3,12,2,8,7,9,9,9,11,11,11	yes	1.5e-50	NA	NA	NA	NA	175	369	389	no	no	yes	NA	NA
Sorghum bicolor	EES08155	CNL	complete	EES08155:20	EES08155:863	DLKEKNYKIATVWGMGGVGKTTLVDHVYKIVKLDFDAAAWVTVSQSYQVEDLLKRIATEFGIITDATNMEIRTLVEIIRKHLEGKRYILVLDDVWEKDVWINNIMEVFPTNCTSRFVLTSRKFDVASLATSNCRIELKPLGDKHSWELFCKAAFRNSDDKRCPSELLDLAAKFLQKCEGLPIAIACIGRLLSFKPLTCPEWDSVYKEVELQ	no	17,16,1,6,4,5,10,3,12,2,8,7,9,9,9,11,11	yes	3.4e-49	0.021	NA	NA	NA	175	369	368	no	no	yes	NA	NA
Sorghum bicolor	EES08173	CNL	partial	EES08173:15	EES08173:1225	SKKGDAGRIVSIVGLGGSGKTTLAQHICHDDKIKVHFKDTIFWIHVSQEFCRDKLIGKLFEAIIGHRSDHHAQQHMLRVISKKLSGNKFLLVLDDAWHEDRHDWENFMVLLDNGAPGSKILLTTRNQSVANAVESKVVFKLAFLSEEESWSFFLKSCGWIEEDLGYDFIEVGKDIVKQCGGVPLAIKILGSVLCERRGINTWRAIRESNLW	no	17,1,6,4,5,10,3,12,2,8,7,9,11,11,11,11,9,11,11,11,11,11,11,11	yes	1.8e-44	1.8e-12	NA	NA	NA	178	390	700	no	no	yes	NA	NA
Sorghum bicolor	EES08313	CNL	complete	EES08313:78	EES08313:846	YSEEQASTVITVSGMGGLGKSTLVTNIYEREKVNFPVHAWIVVSQIYTVKSLLRKLLWKIGHMEPPVPKDIDKMDVHDLKEEIKRKLQNRKCLIVLDDVWEQEVYFKIHDVFQTLQESHIIITTRKDHVSAIASFGHHLELQPLCGPDAFELFCRRAFHSKKGHKCPEEFQEVAVEIVKRCHGLPLAVVTIGSLLSSRPQINIWNQTYNQL	no	16,1,6,4,5,10,3,2,8,7,9,9,11,11	yes	4.7e-47	0.001	NA	NA	NA	178	368	341	no	no	yes	NA	NA
Sorghum bicolor	EES08326	CNL	complete	EES08326:2	EES08326:869	YSDELDSTVITVSGMGGLGKTTLVTNVYEREKINFSATAWMVVSQTYTIEALLRKLLMKVGGEQQVPPNIDKLDVYDLKEKLKQKLKTRKCLIVLDDVWDQEVYLQMSDAFQNLQSSRIIITTRKNHVAALAHPTRRLDIQPLGNAQAFDLFCRRTFYNEKDHACPSDLVEVATSIVDRCQGLPLAIVSIASLLSSRAQTYYIWNQIYKRL	no	3,16,1,6,4,5,10,3,12,2,8,7,9,9,9,9,9,11	yes	6.6e-48	1.3e-05	NA	NA	NA	176	371	363	no	no	yes	NA	NA
Sorghum bicolor	EES08659	CNL	partial	EES08659:3	EES08659:636	MDGTTSLKVLSIVGLGGLGKTTLAMEVFRRIGGQFSCRASAAVSQKLDVKKLLKDLLSQIAQEEVDRMDTWEEGQLIRKLRERLLNKRYLIIIDDVWSKSAWEKVRCALPQNNHNSRILTTPRIESVAKSCCSDPNDCVYRIEPLDESHSKVLFFKRIFGNKDSCPPQLKLISDQILKKCCGSPLAIISIASLLASKPVMLKEQWEKLLVS	no	17,16,1,6,4,5,10,3,12,2,8,7,9,9	yes	3.7e-44	1.3e-05	NA	0.26	NA	168	377	369	no	no	yes	NA	NA
Sorghum bicolor	EES08872	CNL	partial	EES08872:10	EES08872:641	EASKQHGRVVSIVGCGGLGKTTLANVVYQKIRTQFDCWAFVSVSQTPDMRRLFEGILSELGKDINEETRDVRHFIDAIGKFLQTKRYCIVIDDIWDISVWKMIRCALPDNMGGYVIITTTRNFKVAEEIGGAYSMKALCHESSRKLFYTRIFGNEEKYKCPDEHLTEVSHRILNKCAGVPLAIITIASLLANKARDKMEWLEVYNSIGTGL	no	17,16,14,1,6,4,5,10,3,12,2,8,7,9,9	yes	2e-42	0.029	NA	NA	NA	171	379	350	no	no	yes	NA	NA
Sorghum bicolor	EES08935	CNL	partial	EES08935:10	EES08935:514	APDKKITKKVSIVGVGGLGKTTVAKAVYENLKSQFDCAAFVSVGRDLDLVKVFKDILFDLDKEEYKDIHETKRGLEFLIREVREFLEKKRYFVVVDDVWEVEKWKKIKVAFIENNCGSRVITTTRSVDVAKASGEVYNLKPLSDDDSMNLFYTRIFGADRKFLGDQPDDISEKILKKCAGIPLAIITMGSLFAGKEKHQWPVLLDSIGFVH	no	17,16,14,1,6,4,5,10,3,12,2,8,7	yes	5.1e-41	NA	NA	NA	NA	169	381	437	no	no	yes	NA	NA
Sorghum bicolor	EES09001	CNL	partial	EES09001:14	EES09001:705	KTDPNERAVLSIVGFGGVGKTTIATALYRNVRNEFECRASVTVSQNYDQDAVMRSILNQVMPQDTDQKQQGSEPGTPEDKTLVAQIRKKLNRVVLPLIQIHRQQCNDGSSDVKPIKIETMDHDELVNELKKQLADKRYLLLIDDIWSAKTWESIRICLPEENNRGSRIIVTSRFQAVGATCSPNDKIDLLHTADFLTGDESKRLFVQGVSE	no	17,16,1,6,4,5,3,12,2,8,7,9,9	yes	1.3e-45	7.7e-05	NA	NA	NA	182	431	390	no	no	yes	NA	yes
Sorghum bicolor	EES09013	CNL	complete	EES09013:10	EES09013:637	GRSSAEQWIVSIVGFGGLGKTTLAKAVYDKIKPQFDCTAFISVSRDPDIIKIFKDMLYELDNKEYWDIHNIALGQHYLTDLVHEFLKNKRYLIVIDDIWDTKPWEMIRCALPENGQKSRVLTTTRIIDVAEHVGGCYRMKHLTDKSSKILFYGRIFGSIGNCPQQFSDISEKVLKKCGGVPLAIVTISSLLANKTRSINEWSNVCDAIGAG	no	17,16,14,1,6,4,5,10,3,12,2,8,7,11,9	yes	1.9e-44	NA	NA	NA	NA	168	375	378	no	no	yes	NA	NA
Sorghum bicolor	EES09021	CNL	complete	EES09021:10	EES09021:638	GESSVGQRIVSIVGFGGLGKTTLAKAVYDKIKQQYNCTAFISVSRDPDIIKILKDLLYELDKNEYMGIHNAALGQQHLTDLVQEFLKNKRYLIVIDDIWHTKPWEMIRCALPENCRKSGVLTTTRIIDVAEHVGGCYRMKLLTQDSSKILFYGRIFGSIDKCPPQFSDVSEKVLKKCGGVPLAIVTISSLLANKSRNINEWYDVCDAVGAG	no	17,16,14,1,6,4,5,10,3,12,2,8,7,11,9	NA	8.9e-42	0.0043	NA	NA	NA	NA	NA	NA	NA	NA	NA	NA	NA
Sorghum bicolor	EES09166	CNL	partial	EES09166:8	EES09166:700	HKGHPQLMFISILGESGVGKKTLSRILLHDMKNNNHFEIRVWYNMPPDSTTEHLLQTIYERARQAISPTQGDQPVQEGSCDDIAGMLRHLLTNKKYLLIIIGISSKTMLNCLRASLPDDNNGSRVVLVLDIVNEEVAWHANAMNKGLSNGIRHLSRFDKEKSVKLFCSRAFRTNLLDETTVNSMMSKYSEVVYNITWGYPLAIVVLAGLLR	no	17,16,1,6,4,10,3,12,2,8,9,9,9	yes	5e-27	0.069	NA	NA	NA	167	425	305	no	no	yes	NA	NA
Sorghum bicolor	EES09173	CNL	complete	EES09173:19	EES09173:1335	NDDLQKIKIVSVIGLGGSGKTTLAKLVFNDGNIIEKHFEVRLWVHVSQEFDVKDLIKKVFEAFSENNPGPHALPYMTKTISDKLNGKKFLLVLDDVWTNSRDEWEEFMVYIKVGAPQSRILLTTRNTEVAVIVGSTDQFHLPFLSPDDSWQLFQQSLVTPATGWNFEFEEVGKAIVDKCGGVPLAIKVLAGSLHGKDLIEEWQAMRDKNLS	no	17,16,1,6,4,5,10,3,12,2,8,7,9,11,11,11,9,11,11,11,11,11,11,11,11,11,11,11,11,11,11	yes	3.3e-51	6e-11	NA	NA	NA	180	390	783	no	no	yes	NA	NA
Sorghum bicolor	EES09588	CNL	complete	EES09588:78	EES09588:865	YSDKQDSIVITVSGMGGLGKTILVANVYEQEKINFTTHAWIVVSQTYGLVDLLRKMLRKIGDQEHSHSQLMDLDTHDLEVKIKERLSGGNCLFVLDDVWNREAYTQIMDVFQNLQACRVIITTRQEHVAALAQPRHQLKLKPLEHNDAFNLFCRKAFYNRMECKCPQNLEKLANALVDRCQGLPLAIVSIGGMLSSLPATEYVWNETYNQL	no	16,1,6,4,5,10,3,12,2,8,7,9,9,9,11,11	yes	1.1e-50	5.9e-06	NA	NA	NA	174	369	363	no	no	yes	NA	NA
Sorghum bicolor	EES09608	CNL	complete	EES09608:15	EES09608:897	KAYLNGLQVLSVWGIAGVGKSALVRNMYFDRIHRNDQLFEKYGWVDVTHPFNLRDFSRSLLLDFYSEPVQAMRIRDPTQECHKIIQDNRCLVVIDDLQSIEEWDLIQAALVSRPSRSIIIVITTEASIATHCADNEGVVFNVKGLEDKAALKLFKKQVHKQKPSSPIKDSRDEELQELILKCGGLPKVIVAVAIFLAPKTVTWMDSASSLN	no	17,16,6,4,5,1,6,4,10,3,2,11,11,9	yes	3e-39	0.00051	NA	0.57	NA	416	388	403	no	no	yes	NA	NA
Sorghum bicolor	EES09609	CNL	complete	EES09609:78	EES09609:865	HSNEPNNTVITVSGMGGLGKTTLVMNVYERMKSEFPVSARITVSQTYTIDGLLRELLREIGKDTYKQSGTIESMDAYKLREEIKNVLGTRKCLFVLDDVWNKEVYHQMMEDIFNTLRASRIIITTRREDVASLASSGCHLQLQPLGSSYALDLFCRRAFNNTADRKCPQELEDVAVSIVERCKGLPLAIISMGSLMSSKKPTKHAWNQMYN	no	16,1,6,4,5,10,3,12,2,8,7,9,9,9,11,11	yes	2.1e-49	1.8e-06	NA	NA	NA	173	371	363	no	no	yes	NA	NA
Sorghum bicolor	EES09653	CNL	partial	EES09653:433	EES09653:1511	ESSSKKISILPIHGIGGIGKTTFSRLIYNDPKFKSYSKAWVHVSHRFDLNKIRESIISQLSEKQNQANERHVVHSSLTKLLPGKKIMIVLDDLWEDNQFQLMDLKDMLYHDDSNIIILVTTRSESVAERICTNLQPYKILPLTNDMCWDIIKQRSGFGAREDKEKLRGIGQEIANKCAGVALAAQSLGFTLRGMNFDQWMKVKHNDIWKEH	no	1,6,4,5,7,3,2,8,7,9,9,9,9,11,11,11,11,11,11,11,11,11,11,11,11,11	yes	2.9e-37	1.7e-28	NA	5.4e-06	NA	409	396	788	no	no	yes	NA	NA
Sorghum bicolor	EES09905	CNL	partial	EES09905:92	EES09905:256	SDNIQQFQVIFVWGMGGLGKTTLVGGVYQSPKLSDIFEKYVFITIMRPFNLEEFLRSLARQLHEGSSKNQELLENGNNNKKSLALMDVDNLTKELKRLLEKKSSLIVLDDFFETSEWDLIKPKLLPLLENTSRIIITTREENIAYHCSGKHGVVCNLQVLQPDDALCLLSEKVTKMSSSFLGL	no	1,6,4,5,10	NA	2.8e-30	NA	NA	NA	NA	NA	NA	NA	NA	NA	NA	NA	NA
Sorghum bicolor	EES09949	CNL	partial	EES09949:10	EES09949:249	DLSNQQLKIVSIVGLGGLGKTTLANEVYKKLKAQFECEAFVSVSLDPRMDQVFKSMLRQLDKDKYNNIKGEMWDETQLINELRYLLKNKSPKSQVGDFIWSKQHYARMSTD	no	17,16,14,1,6	NA	9.3e-14	NA	NA	NA	NA	NA	NA	NA	NA	NA	NA	NA	NA
Sorghum bicolor	EES10096	TNL	partial	EES10096:11	EES10096:522	GPHNGKPRVICVWGLPGSGRTAVVTNVCYRMQDFQYMRILRMYQPDNLMGFCRCLLSDIPSRLLEGETPIQRCQYFLRNFRCLVVIDEVKSREEWKMIEDAQLISATSESCIVIVTTEESVAVHCAGAEDLVCSIKCLQQKAAVDLFQQVCCVSTSFSVLV	no	17,6,4,5,1,4	NA	7.1e-22	NA	NA	NA	NA	NA	NA	NA	NA	NA	NA	NA	NA
Sorghum bicolor	EES10297	CNL	partial	EES10297:11	EES10297:647	DVSNMKVKTVSIVGVGGLGKTTLAKAVYNKLKGDFNCGAFVPVGQNPSLEKLLKDILMDLDWRRRHELSTAVLDQRQLIDELRSFLETKRYFIVIDDLWEKQSWETIKLAIDDDNNCGGRILITTRKLEVAEKADYVYKLPPLPNDSSRKLFHTRINGDERKYVIDYKPDEICDDIIRKCGGIPLAIITMASLLVRKPRNKWSEICKSICF	no	17,16,14,1,6,4,5,10,3,12,2,8,7,9,9	yes	1.5e-36	NA	NA	NA	NA	173	380	429	no	no	yes	NA	NA
Sorghum bicolor	EES10330	CNL	complete	EES10330:14	EES10330:878	TDKAKKAGVLSIVGYGGVGKTSIATALYKKLGDQFSCCAMVTVSQSSNIEAILDSIRNQVKPKSSNQELRHGASDKNGLAAACLDGLQGHIRRGASAFKAKCRCLGTSEETQGGTKRNQLNNELRDHFQQNSYLVLIDDVWAASTLEDIRKAFPQPNMHTKEGRIIVTTRFPAVATARRGQEGDRVHKVVPLPLEKSGVLFGQAHSESKPS	no	17,16,1,6,4,5,3,12,2,8,7,11,9,9,11	yes	3.2e-28	7.3e-05	NA	NA	NA	182	443	384	no	no	yes	NA	NA
Sorghum bicolor	EES11060	CNL	partial	EES11060:86	EES11060:805	ANCYDVYSVVPIVGPAGVGKTSLAQHVYNDEGISSNFDIKMWVWVCQEFNVLELTRKLTEEATESPCDFADMNQMHRVITNQLNGKRFLLVLDDVWDESRDRWASLQVPLKCAAPGSKIIVTTRSTKVAKMMALKIHQLGYLSDTSCWSVCQDAALRGRDPSIIDDSLIPIGKLVAARCKGLPMAANAAGHVLSSAIERSHWEAVEQSDFW	no	1,6,4,5,10,3,2,8,7,9,9,11,19,11,11,11	yes	3.1e-41	2.3e-08	NA	NA	NA	59	378	524	TRUE	no	NA	NA	NA
Sorghum bicolor	EES11803	NA	partial	EES11803:478	EES11803:945	NA	no	11,9,11,11,11,11	yes	0.018	1.2e-13	NA	0.009	NA	NA	NA	NA	NA	NA	NA	NA	NA
Sorghum bicolor	EES11805	NA	partial	EES11805:361	EES11805:966	NA	no	11,11,11,11,9,9,11,11,11,11	yes	NA	1.8e-11	NA	NA	NA	NA	NA	NA	NA	NA	NA	NA	NA
Sorghum bicolor	EES11822	CNL	partial	EES11822:15	EES11822:902	NA	no	2,8,7,11,11,11,11,11	yes	NA	NA	NA	NA	NA	NA	NA	NA	NA	NA	NA	NA	NA
Sorghum bicolor	EES12509	CNL	partial	EES12509:15	EES12509:873	LLEKGESNIIGVWGQGGIGKTTLLHAFNNDLEKKDHNYQVVIFIEVSNSETLNTVEMQQTISDRLNLPWNELETVEKRARFLAKALARKRFLLLLDDVRKRFRLEDVGIPTPDTKSQSKLILTSRFQEVCFQMGAQRSRIEMKVLDDDAAWNLFLSKLSNETFEAVESPNFNKVVRDQARKIFFSCGGLPLALNVIGTAVAGLQGPKEWIS	no	17,1,4,5,10,3,12,2,8,7,9,9,11,11,11,11	yes	1.5e-46	2.6e-13	NA	NA	NA	158	368	385	no	no	yes	NA	NA
Sorghum bicolor	EES12510	CNL	partial	EES12510:181	EES12510:904	YCDSTIVSIIGVCGPGGVGKTTLLNTFNNELKASGRDYQVVIMIEVSNSRTLNKVAIQSTVTDRLGLPWDDRQTEEARARFLMKALRRKKFVILLDDVWNKFQLEDVGIPTPDSESKSKVILTSRYAEVCYQMGAQQSLIKMEYLEKEAALELFRSNLSTQAIAAIDSSGPNNAVKEHADAIFQSCGGLPLALKVIASAVAGLTTPSEWSL	no	1,4,5,3,12,2,7,11,9,9,11,11,11,11,11,11	yes	9.5e-45	1.1e-12	NA	NA	NA	161	368	417	no	no	yes	NA	NA
Sorghum bicolor	EES13243	CNL	partial	EES13243:8	EES13243:718	FHEDPQLMFFFITGESGIGKNTVVINMLDSDKMPTELKIVLFRVPPGATVDLVLMEIYKRAAGDIYFTEEGQIELSDPKADDIDHDYVDISEKIRRVLVGNRYLLILGGTYSKTMFNCVRASLPDSNNGSRVLLILDNEDEQVAWHAYSMIQGGINGIFMRRLDEKGSGLLFRSRAFSKVDISDYGDMMTTNNMYNEIVYDITGGYPLAIV	no	17,16,1,4,10,3,12,2,8,7,9,9	yes	5e-14	0.0087	NA	NA	NA	165	450	293	no	no	yes	NA	NA
Sorghum bicolor	EES13244	CNL	partial	EES13244:8	EES13244:771	REDHTRQMFISILGESGVGKETLVNILYNKQVENTTCVFKVIFWYSAPPDSTVEDLLQQIYERAVDWCTTQEIADLHQPKKDDNIDDISEKLRNLLAGKRYLLIVNGISSKTMLNCVRASLPDDDNGSRVLLILDTENEEVAWHANAMNQMDFNGIHMLSRFDEKRSGQLFHSRAFRREEVSDDGSKEDMKMTNNNYDKIVYEITGGYPLA	no	17,16,1,4,10,3,12,2,8,7,9,9,9,9	yes	3.7e-24	0.028	NA	NA	NA	164	427	264	no	no	yes	NA	NA
Sorghum bicolor	EES13252	CNL	partial	EES13252:11	EES13252:534	NA	no	17,2,8,7,11	yes	NA	NA	NA	NA	NA	NA	NA	NA	NA	NA	NA	NA	NA
Sorghum bicolor	EES13918	NA	partial	EES13918:130	EES13918:1066	NA	no	11,9,11,11,11,11,8,11,17,11,11,11	yes	NA	2.1e-50	NA	1.1e-17	NA	NA	NA	NA	NA	NA	NA	NA	NA
Sorghum bicolor	EES14143	CNL	complete	EES14143:12	EES14143:1134	HQDQKNVQVLPIIGMGGVGKTTLAKMVYEDHRIQKHFDLKIWHCVTEKFEATSVVRSVTELATGERCDLPDDSKFWRARLQGAIGRKRFLLILDNVRNEEQGKWEDKLKPLLCTSIGGSGSMIVVTSQSQQVAAIMGTLPTKELACLTEDYAWELFSKKAFSKGVQEQPKLVTIGRRIVHMCKGLPLALNTMGGLMSSKQEVQDWEAIAES	no	17,16,1,6,4,5,10,3,12,2,8,7,9,11,11,11,11,11,11,11,11,11,11,11	yes	7.5e-46	2.6e-10	NA	0.1	NA	167	380	622	no	no	yes	NA	NA
Sorghum bicolor	EES14172	CNL	complete	EES14172:12	EES14172:1148	QQDQRNVQVLPIIGMGSLGKTTLAKMVFNDHKVQKHFELKMWHCVSDNIETTAVVRSIIELATNARCDLPDTIELLRGKLQEVVGRKRFLLVLDDVWNEEQQKWEDHLKPLLCSSNAGLGSMIVVTSRSQKVASIMGTLSPHELSCLNDDDSWELFSKRAFSKGVQKQAEFIQIGKFIVNRCKGLPLALKTMGGLMSSKHQTKEWEAIAKD	no	17,16,1,6,4,5,10,3,12,2,8,7,9,11,11,11,11,11,11,11,11,11,11,11	yes	4.8e-50	1.2e-12	NA	0.088	NA	173	378	640	no	no	yes	NA	NA
Sorghum bicolor	EES14409	CNL	partial	EES14409:7	EES14409:982	NA	no	17,12,2,8,7,9	yes	NA	0.98	NA	NA	NA	NA	NA	NA	NA	NA	NA	NA	NA
Sorghum bicolor	EES14688	CNL	partial	EES14688:16	EES14688:300	KNIREKLVIFPIYGIGGIGKTTMAKLLFKDIQFNKYSRVWVYVSQIFNLKKIGNSIISQVSKTESQITEMQMIHTHLAELLAGKNILIVLDDIWEDNNQFQLDELKKMLNVCEASKIIVILTTRNEGIADNLHTIQPYKLPLLSNDSCWTIIQKKSDFDSRADKTQLEQIGKDIATKCGGVPLAAKALGNM	no	17,16,1,6,4,5	NA	1.1e-39	NA	NA	NA	NA	NA	NA	NA	NA	NA	NA	NA	NA
Sorghum bicolor	EES15624	CNL	partial	EES15624:138	EES15624:1240	TQSGKTLSVLPIVGPGGIGKTTFTQHLVNHTRIKQCFHDINIWICVSTNFDVLKLTKEMLSCLPATENEENNETTTNLDQLQKSIAQRLKSKRFLIVLDDIWECSSNDEWEKLLAPFKKDETSGNVILVTTRFPKIVEMVKKETNPIDLRGLDPDEFWKFFQICAFGRIQDEHDDQELIGIARQIADKLKCSPLAAKTVGRLLIKKPFQEH	no	1,6,4,5,10,3,12,2,8,7,9,11,11,11,11,11	yes	9e-42	0.0025	NA	NA	NA	112	387	785	no	no	yes	NA	NA
Sorghum bicolor	EES15626	CNL	complete	EES15626:41	EES15626:1202	EASSTRYSSLAIIGAGGMGKSTLVQYVYNDKRIEEGFDIRMCVGLSSTMWVCISRKLDVRRHTREIIESATNGECPCINNLDTLQCKLRDILQKSEKFLLVLDDVWFEKSDSETEWFQLLDPFVSKQMGSKVLVTSRRETLPAAVFCDQQQVVHLEKLDDANFLALFKHHAFSGAKIGDELLHNNLEHTAVEIAKRLGQCPLAAKVLGSRL	no	16,1,6,4,5,10,3,2,8,7,9,9,9,11,11,11	yes	1.6e-28	4.6e-09	NA	NA	NA	143	387	713	no	no	yes	NA	NA
Sorghum bicolor	EES16086	CNL	partial	EES16086:16	EES16086:807	GSTQQQLRMVSIVGFGGLGKTTLANQVYGKIKSRFDCTAFVPVSRSPIIKKILRDLLTELGSSKSHSSSDDDDERQLINEVRAYLQDKRYLIVVDDIWSTVAWEFMKSALPENKLCSRIITTTRHSDVARSCCSSYEGYIHNIQPLSDQDSSMLFYNRVFQRQSSCPPHLEEVSLSIIKRCHGLPLAINTVASLLANRSNDIDQWEQVRDS	no	17,16,14,1,6,4,5,10,3,12,2,8,7,9,9,9	yes	2.5e-49	0.0014	NA	NA	NA	182	376	420	no	no	yes	NA	NA
Sorghum bicolor	EES16173	CNL	partial	EES16173:11	EES16173:626	GTSVQQLKVISIVGPGGLGKTTLANEVYHRLEGQFQCRAFVSLSQQPDVKKILRNILYQVSHQEYANMETWDEEMYFIVIDDIWSTQAWKTIRCALYVNNCASRIMTTTRIVSIAKSCCSPHHDHVYEITPLSTDNSKCLFFKRIFGSEHICPPHLEDISSEILEKCSGSPLAIVTMASLLANKACTKQEWDRVCNSIGSTLEKDPDVEEM	no	17,16,14,1,6,4,5,10,3,12,2,8,7,9,9	yes	1e-38	0.0011	NA	NA	NA	168	367	368	no	no	yes	NA	NA
Sorghum bicolor	EES16317	CNL	partial	EES16317:121	EES16317:972	KLTISSVHVLPIVGIGGVGKTTLAQEITTNQRVKSHFDKIIWICVSDEFDEERFTKILIKSLSGREPTSDNLDDLQQHLVKNVGKKRFLLILDDIWPAGLEDGQRWKKFCVPLENVLQGSMLLVTTRFAEVADTVGTMKSFALEGLEDGVFWNFFKLCVFGAEDSEIDPELEQIGRSILPKLKGTPLAAKTIGRLLRKSLNTAHWNNILNN	no	1,6,4,5,3,12,2,8,7,11,9,11,11,11,11,11,11	yes	1.1e-41	1.8e-05	NA	NA	NA	76	388	538	no	no	yes	NA	NA
Sorghum bicolor	EES16394	CNL	partial	EES16394:12	EES16394:669	DGEPQQLRVISIVGFGGLGKTTLARAVYDSPHAKETFHCRAWVSTAGATSPEISISQRIKAVLRDILQQVVPKDTMEMDVDSNHLEASLKEYLSDKRYLIVIDDVQMDEWRTVNSAFLGSNNRSSRIILTTSIQSVANICSHGNGYVYQMSTLGEQDSKKIAFPGTTSPELEHGSAALLRKCDGLPLALDSVSDYLKSSSEPTGELCAKLC	no	17,16,1,4,5,3,2,8,9	yes	2e-31	0.00054	NA	NA	NA	196	382	459	no	no	yes	NA	NA
Sorghum bicolor	EES16599	CNL	complete	EES16599:72	EES16599:1256	EASSTRYSSLAIIGAGGMGKSTLVQYVYNDKRIEEGFDIRMWVCISRKLDVRRHTREIIESATNGECPCIDNLDTLQCKLRDILQKSQKFLLVLDDVWFEKSDSETEWFQLLDPFVSKQMGSKVLVTSRRETLPAAVFCDQQQVVHLEKMDDANFLALFKHHAFSGAKIGDQLLHNKLEHTAVEIAKRLGQCPLAAKVLGSRLSTKKDTAE	no	16,1,6,4,5,10,3,2,8,7,9,9,11,9,11,11,11	yes	1.4e-31	4e-08	NA	NA	NA	190	379	728	no	no	yes	NA	NA
Sorghum bicolor	EES17133	CNL	complete	EES17133:21	EES17133:910	DLEEKNYKIATVWGMGGVGKTTLVDHVYKTVKLEFDAAAWVTVSKSYQVEDLLKRIAREFGIVTDVTNMEIRNLVEIIRKHLEGKRFILVLDDVWEKDVWINNIMEVFPTNCTSRFVFTSRKFEVASLATGNCAIKLEPLGEKHSWKLFCKAAFRNSDDKWCPSELHDLATKFLQKCEGLPIAIACIGRLLSSKDLTYAAWDSVYRELEFQ	no	17,16,1,6,4,5,10,3,12,2,8,7,9,9,9,11,11,15	yes	1.5e-50	0.00013	NA	NA	NA	176	369	388	no	no	yes	NA	NA
Sorghum bicolor	EES17188	CNL	complete	EES17188:16	EES17188:1297	QASNLQLMVIPIVGMGGLAKTTLAQLVYNDPEVKKHFQLQLWVCVSDNFVVDLVAKSIVEEAKEKNTSNPSGKSPLDKLKEVVSGKRYLLVLDDVWSRDANKWGKLKSCLVHGGSGSIVLTTTRDQEVAKLMGTTNELYILKGLEESFIKEIIETRAFSSTNKRDTKLVEMVGDIAKRCAGSPLAATAMGSLLHTKTTAKEWNAVLSKSTI	no	17,16,1,6,4,5,3,12,2,8,7,9,11,11,11,11,11,11,11,11,11,11,11,11,11,11,11	yes	1.2e-44	7.9e-13	NA	NA	NA	178	377	777	no	no	yes	NA	NA
Sorghum bicolor	EES17236	CNL	partial	EES17236:15	EES17236:761	DDNGHQLKVVSIVGFGGLGKTTLANQVYHKTKGQFDCSCFVPVSRNPNVAKILANMLKDLESPFDPSHDERQLIDKLRAFLQDKRYFVVVDDIWSTQAWELVKSALPENNLNSRIITTTRITDVATSCCSSLAGYVHNIQPLSDQQSQQLFSKRVFGDTSECPPYLQEISHRILEKCHGLPLAIITIASLLAGKSNKDQWEQVYNSINSAF	no	17,16,14,1,6,4,5,10,3,12,2,8,7,9,9,9	yes	1e-48	NA	NA	NA	NA	170	370	378	no	no	yes	NA	NA
Sorghum bicolor	EES17436	CNL	complete	EES17436:73	EES17436:1406	KYRGSDLTVLSIVGPGGLGKTTLTQHIYQEVKCHFQVMLWVCVSQNFNANRLAQEIVKQIPKLDNENGNESVEELIEKRLQSKQFFLVLDDMWTYHEDDWKKILAPFKKVQTKGNMVIVTTRIPKVAQLVTTIGCPIRLERLNDEECMHFFKACVFDEKQPWEEHTNLHAVGWEIVKKLKGFPLAVKTVGRLLKSELTVDHWRRVFESKEW	no	16,1,6,4,5,10,3,12,2,8,7,9,11,9,11,11,11,11,11,11,11,11,11,11	yes	2.4e-46	NA	NA	NA	NA	216	386	842	no	no	yes	NA	NA
Sorghum bicolor	EES17438	CNL	complete	EES17438:74	EES17438:1393	YCANDDLTVLSIVGPGGLGKTTFTQHINEDVKSHFHVRVWVCISQNFSASRLAQEIAKQIPKLDNEKENESAEDLIEKRLQSKQFLLVLDDMWTYHEDEWKKLLAPFKKVQTKGNMVIVTTRIPKVAQMVTTIGCPIRLERLSDEECMCFFQECVFGDQQTWEGHTNLHYYGCKIVKRLKGFPLAVKTVGRLLKAELTADHWRRVYESKEW	no	16,1,6,4,5,10,3,12,2,8,7,9,9,11,11,11,11,11,11,11,11,11	yes	3.2e-45	NA	NA	NA	NA	216	387	825	no	no	yes	NA	NA
Sorghum bicolor	EES18890	CNL	complete	EES18890:15	EES18890:1212	CNAGENNMIVSIIGLGGSGKTTLAKHICHDVKIKEHFGGEIFWVHVSQEFDVQKLIGKLFETIVGDNSDRHPPQHMVQKISEKLSNKKFLLILDDAWHEDRHDWEQFMVQLKCGAPETRIVLTTRDRKVAQAVESRYTFELAFLSESESWNLFLKGSGLAEQDLSCDEVQVGKEIIKGCGGVPLAIQTLGAVLCDKKQISTWRAIRENNLW	no	17,16,1,6,4,5,10,3,12,2,8,7,11,11,11,11,9,11,11,19,11,11,11,11,9,11,11,11	yes	6.7e-48	1.8e-11	NA	NA	NA	176	388	667	no	no	yes	NA	NA
Sorghum bicolor	EES19053	CNL	partial	EES19053:10	EES19053:788	VCDHKKMKIVSVVGFGGLGKTTLAKAVYDQLKPHFKWGAFIPVGRNPDIKKVFRDILIGLDKEKFMNFNMTMLDVRQLMDELKEFVKEKRCFIVIDDIWDEDSWKLFRCAMQESNYGSRFIITTRISTVARHADEVYKIQPLSCDNSEKLLFARISDSEGKYLGSPSVETCERILKKCSGVPLAIITIASLLASKPVEDWSEVYNSIGFGH	no	17,16,14,1,6,4,5,3,12,2,8,7,9,9	yes	3e-34	NA	NA	NA	NA	173	384	813	no	no	yes	NA	NA
Sorghum bicolor	EES19322	CNL	partial	EES19322:334	EES19322:1021	TSSSKCYSVICIHGIAGSGKTTLAQYVCDHENENREKYFNPIMLIHVSETFRVNDILHDTLEAITEDRHSDISGCKGLQAKLVDKLSGKRFLLVLDDLWVNDENHQDLEEILSPFNVGKRGSRILVTARNKEAALGANNLISISDLDEEQYFSMFMHYALDSTIFDDRKYIPIGRKIAKKLHRSPIAAVTVAGQLWRNPDISFWETAAKLD	no	1,6,4,5,3,2,8,7,9,17,9,11	yes	7.3e-27	0.042	NA	NA	NA	NA	NA	NA	NA	NA	NA	NA	NA
Sorghum bicolor	EES19529	CNL	partial	EES19529:76	EES19529:589	ETCRSVAPVVAVVGHGGVGKTTVAQCVYNDARIEARFGMRAWVCVWDRSDEVELTREILQSIGCADDAPCDDGLSSLDSLQEELEKLVASKRFLLVLDDVWIDEGKTEKENRSMWKKVLAPLRSAAIGSKVLVTTRMKLVAEVLNAAHVVSLDRLRSSDCWLLLKEVALGGQPMDFPPELQEILGAIVANVKGLPLATKAIGQMISSTRST	no	16,1,6,4,5,3,12,2,8,9	NA	6.6e-40	0.0093	NA	NA	NA	NA	NA	NA	NA	NA	NA	NA	NA
Hordeum vulgare	HORVU0Hr1G000130.1	CNL	partial	HORVU0Hr1G000130.1:14	HORVU0Hr1G000130.1:248	DENKHGRKVLSIVGFGGLGKTTLANEVSRKIRGHFDCHAFVSVSQKPDTMKIIKDVISQVSYSDEFKKDIETWDEKKSISKLRELLKE	no	17,16,14,1,6	NA	8.5e-16	NA	NA	NA	NA	NA	NA	NA	NA	NA	NA	NA	NA
Hordeum vulgare	HORVU0Hr1G000130.2	CNL	partial	HORVU0Hr1G000130.2:14	HORVU0Hr1G000130.2:248	DENKHGRKVLSIVGFGGLGKTTLANEVSRKIRGHFDCHAFVSVSQKPDTMKIIKDVISQVSYSDEFKKDIETWDEKKSISKLRELLKE	no	17,16,14,1,6	NA	8.5e-16	NA	NA	NA	NA	NA	NA	NA	NA	NA	NA	NA	NA
Hordeum vulgare	HORVU0Hr1G000130.3	CNL	partial	HORVU0Hr1G000130.3:14	HORVU0Hr1G000130.3:248	DENKHGRKVLSIVGFGGLGKTTLANEVSRKIRGHFDCHAFVSVSQKPDTMKIIKDVISQVSYSDEFKKDIETWDEKKSISKLRELLKEKXXXXXXXXXWIEAAWTDITRTLTR	no	17,16,14,1,6	NA	4.1e-16	NA	NA	NA	NA	NA	NA	NA	NA	NA	NA	NA	NA
Hordeum vulgare	HORVU0Hr1G001780.1	CNL	partial	HORVU0Hr1G001780.1:20	HORVU0Hr1G001780.1:651	GSDDVQRSLITLTGMGGLGKTTLAANVYRKEREKFQCHAWVSISQTYSREDVLRNIITELFKDEVNVPPNITAMDITSLEETLKRYLEELKYLIILDDVWTPDAFEDLSRSLVCNGKGSRLIITTRQADVAALASQGHILTVEPLPEDKAWDLFCKKSFPRETKHHCPEELRLLSEEILSKCKGLPLAIVSIGSLLHVREKTIEEWKRIND	no	17,16,1,6,4,5,10,3,12,2,8,7,9,9	NA	2.8e-57	0.0091	NA	NA	NA	NA	NA	NA	NA	NA	NA	NA	NA
Hordeum vulgare	HORVU0Hr1G001780.2	CNL	partial	HORVU0Hr1G001780.2:20	HORVU0Hr1G001780.2:651	GSDDVQRSLITLTGMGGLGKTTLAANVYRKEREKFQCHAWVSISQTYSREDVLRNIITELFKDEVNVPPNITAMDITSLEETLKRYLEELKYLIILDDVWTPDAFEDLSRSLVCNGKGSRLIITTRQADVAALASQGHILTVEPLPEDKAWDLFCKKSFPRETKHHCPEELRLLSEEILSKCKGLPLAIVSIGSLLHVREKTIEEWKRIND	no	17,16,1,6,4,5,10,3,12,2,8,7,9,9	NA	2.2e-57	0.011	NA	NA	NA	NA	NA	NA	NA	NA	NA	NA	NA
Hordeum vulgare	HORVU0Hr1G001780.3	CNL	partial	HORVU0Hr1G001780.3:20	HORVU0Hr1G001780.3:628	GSDDVQRSLITLTGMGGLGKTTLAANVYRKEREKFQCHAWVSISQTYSREDVLRNIITELFKDEVNVPPNITAMDITSLEETLKRYLEELKYLIILDDVWTPDAFEDLSRSLVCNGKGSRLIITTRQADVAALASQGHILTVEPLPEDKAWDLFCKKSFPRETKHHCPEELRLLSEEILSKCKGLPLAIVSIGSLLHVREKTIEEWKRIND	no	17,16,1,6,4,5,10,3,12,2,8,7,9	NA	2.2e-57	NA	NA	NA	NA	NA	NA	NA	NA	NA	NA	NA	NA
Hordeum vulgare	HORVU0Hr1G001780.4	CNL	partial	HORVU0Hr1G001780.4:20	HORVU0Hr1G001780.4:628	GSDDVQRSLITLTGMGGLGKTTLAANVYRKEREKFQCHAWVSISQTYSREDVLRNIITELFKDEVNVPPNITAMDITSLEETLKRYLEELKYLIILDDVWTPDAFEDLSRSLVCNGKGSRLIITTRQADVAALASQGHILTVEPLPEDKAWDLFCKKSFPRETKHHCPEELRLLSEEILSKCKGLPLAIVSIGSLLHVREKTIEEWKRIND	no	17,16,1,6,4,5,10,3,12,2,8,7,9	NA	2.2e-57	NA	NA	NA	NA	NA	NA	NA	NA	NA	NA	NA	NA
Hordeum vulgare	HORVU0Hr1G001780.5	CNL	partial	HORVU0Hr1G001780.5:20	HORVU0Hr1G001780.5:628	GSDDVQRSLITLTGMGGLGKTTLAANVYRKEREKFQCHAWVSISQTYSREDVLRNIITELFKDEVNVPPNITAMDITSLEETLKRYLEELKYLIILDDVWTPDAFEDLSRSLVCNGKGSRLIITTRQADVAALASQGHILTVEPLPEDKAWDLFCKKSFPRETKHHCPEELRLLSEEILSKCKGLPLAIVSIGSLLHVREKTIEEWKRIND	no	17,16,1,6,4,5,10,3,12,2,8,7,9	NA	2.2e-57	NA	NA	NA	NA	NA	NA	NA	NA	NA	NA	NA	NA
Hordeum vulgare	HORVU0Hr1G005590.1	CNL	partial	HORVU0Hr1G005590.1:32	HORVU0Hr1G005590.1:308	NA	no	3,12,2,8,7,9,9	NA	4.4e-10	NA	NA	NA	NA	NA	NA	NA	NA	NA	NA	NA	NA
Hordeum vulgare	HORVU0Hr1G005590.2	CNL	partial	HORVU0Hr1G005590.2:59	HORVU0Hr1G005590.2:335	NA	no	3,12,2,8,7,9,9	NA	4.4e-10	NA	NA	NA	NA	NA	NA	NA	NA	NA	NA	NA	NA
Hordeum vulgare	HORVU0Hr1G005720.1	CNL	partial	HORVU0Hr1G005720.1:15	HORVU0Hr1G005720.1:224	NA	no	12,2,8,7,11,9	NA	NA	0.0017	NA	NA	NA	NA	NA	NA	NA	NA	NA	NA	NA
Hordeum vulgare	HORVU0Hr1G007760.1	CNL	partial	HORVU0Hr1G007760.1:78	HORVU0Hr1G007760.1:298	PETETENTVITVSGMGGLGKSTLVSNVYEREKINFPAHAWIVVSQVYTVDALLRKLLWKIGYTEQPLSAGIDKMDVHDLKKEIQQRLKNRKYLIVLDDVWEQDVYFQIHDALQDLPGSRXXXXXXXXXXXXXXXXXXXXXXXXXXXXXXXXXXVAGGHGCTSKE	no	16,1,6,4	NA	7.9e-24	NA	NA	NA	NA	NA	NA	NA	NA	NA	NA	NA	NA
Hordeum vulgare	HORVU0Hr1G007760.2	CNL	partial	HORVU0Hr1G007760.2:80	HORVU0Hr1G007760.2:300	PETETENTVITVSGMGGLGKSTLVSNVYEREKINFPAHAWIVVSQVYTVDALLRKLLWKIGYTEQPLSAGIDKMDVHDLKKEIQQRLKNRKYLIVLDDVWEQDVYFQIHDALQDLPG	no	16,1,6,4	NA	1.5e-23	NA	NA	NA	NA	NA	NA	NA	NA	NA	NA	NA	NA
Hordeum vulgare	HORVU0Hr1G008580.1	CNL	partial	HORVU0Hr1G008580.1:178	HORVU0Hr1G008580.1:878	RFLGDCDSALGVWGAGGVGKTTVLKQVRDVCGRVAPFFDHVLLLAASRDCTVANLQKEVVAVLGLRDAPTEQAQAAGILSFLRDKSFLLLLDSVWERLDLERVGIPQPLGVVAGRVRKVVVASRSEAVCEDMGCRKKMKMECMNEDDAWSLFEANAGEEAISGNAQISTLARQVAAECNGLPLFLATVGRALSNKRTAEEWCHALDKLKKP	no	1,4,5,10,3,2,7,11,9,11,11,11,11	yes	5.9e-42	8.1e-13	NA	0.007	NA	159	385	372	no	no	yes	NA	NA
Hordeum vulgare	HORVU0Hr1G008580.2	CNL	partial	HORVU0Hr1G008580.2:12	HORVU0Hr1G008580.2:545	NA	no	3,2,7,11,9,11,11,11,11	NA	1.1e-08	4e-13	NA	0.0011	NA	NA	NA	NA	NA	NA	NA	NA	NA
Hordeum vulgare	HORVU0Hr1G008580.3	NA	partial	HORVU0Hr1G008580.3:52	HORVU0Hr1G008580.3:362	NA	no	11,9,11,11,11,11	NA	NA	1.6e-12	NA	4.9e-05	NA	NA	NA	NA	NA	NA	NA	NA	NA
Hordeum vulgare	HORVU0Hr1G014510.3	CNL	partial	HORVU0Hr1G014510.3:253	HORVU0Hr1G014510.3:1358	GAATKTVSVLPIVGPGGIGKTTFLQHLYNDARTQEHFHVKVWVCVSTDFDVLKLTREIIGCIPATGGAGSSSVANETTNLDQLQRSIAERLKSKRFLIVLDDIWKCDGEDQWKTLLAPFTKGEAKGSMLLVTTRFPKVADMVKTLDPLELRGLESNAFFTFFEACIFGGDDKPEHYEYDLAGIARKIADKLKGSPLAAKTVGKLLHKDLSR	no	1,6,4,5,3,12,2,7,11,19,19,11,11,11,11,11	yes	2.2e-36	NA	NA	NA	NA	NA	NA	NA	NA	NA	NA	NA	NA
Hordeum vulgare	HORVU0Hr1G014510.4	CNL	partial	HORVU0Hr1G014510.4:78	HORVU0Hr1G014510.4:1094	GAATKTVSVLPIVGPGGIGKTTFLQHLYNDARTQEHFHVKVWVCVSTDFDVLKLTREIIGCIPATGGAGSSSVANETTNLDQLQRSIAERLKSKRFLIVLDDIWKCDGEDQWKTLLAPFTKGEAKGSMLLVTTRFPKVADMVKTLDPLELRGLESNAFFTFFEACIFGGDDKPEHYEYDLAGIARKIADKLKGSPLAAKTVGKLLHKDLSR	no	1,6,4,5,3,12,2,7,11,19,19,11,11,3	yes	1.7e-36	NA	NA	NA	NA	NA	NA	NA	NA	NA	NA	NA	NA
Hordeum vulgare	HORVU0Hr1G014510.5	CNL	partial	HORVU0Hr1G014510.5:254	HORVU0Hr1G014510.5:722	GAATKTVSVLPIVGPGGIGKTTFLQHLYNDARTQEHFHVKVWVCVSTDFDVLKLTREIIGCIPATGGAGSSSVANETTNLDQLQRSIAERLKSKRFLIVLDDIWKCDGEDQWKTLLAPFTKGEAKGSMLLVTTRFPKVADMVKTLDPLELRGLESNAFFTFFEACIFGGDDKPEHYEYDLAGIARKIADKLKGSPLAAKTVGKLLHKDLSR	no	1,6,4,5,3,12,2,7,11	yes	9.9e-37	NA	NA	NA	NA	NA	NA	NA	NA	NA	NA	NA	NA
Hordeum vulgare	HORVU0Hr1G014510.6	CNL	partial	HORVU0Hr1G014510.6:343	HORVU0Hr1G014510.6:672	GAATKTVSVLPIVGPGGIGKTTFLQHLYNDARTQEHFHVKVWVCVSTDFDVLKLTREIIGCIPATGGAGSSSVANETTNLDQLQRSIAERLKSKRFLIVLDDIWKCDGEDQWKTLLAPFTKGEAKGSMLLVTTRFPKVADMVKTLDPLELRGLESNAFFTFFEACIFGGDDKPEHYEYDLAGIARKIADKLKGSPLAAKTVGKLLHKDLSR	no	1,6,4,5,3,12,2,7	NA	6.8e-37	NA	NA	NA	NA	NA	NA	NA	NA	NA	NA	NA	NA
Hordeum vulgare	HORVU0Hr1G015160.1	CNL	partial	HORVU0Hr1G015160.1:58	HORVU0Hr1G015160.1:588	PCELRPRKQPKLVAIVGAGGTALANKVYEELRVKDFDYWPFISMSANPDMTSTLTALLLELTGEFKKTASVEQLIIDINESLLDKRYLIVIDGICQKETWEVIKHAFPMTSCGIIITTSPCEDIAELCRSSFNGHIYHIRPLGMVHSRPLLHQRLFNSDDDCRPHIEEVSDQILEKCDDLPLAILLTSGLLANTERTEHLWNHMADSIGCA	no	1,6,4,10,3,12,2,8,7,9,9,12	yes	3.2e-24	0.58	NA	NA	NA	NA	NA	NA	NA	NA	NA	NA	NA
Hordeum vulgare	HORVU0Hr1G015160.2	CNL	partial	HORVU0Hr1G015160.2:174	HORVU0Hr1G015160.2:704	PCELRPRKQPKLVAIVGAGGTALANKVYEELRVKDFDYWPFISMSANPDMTSTLTALLLELTGEFKKTASVEQLIIDINESLLDKRYLIVIDGICQKETWEVIKHAFPMTSCGIIITTSPCEDIAELCRSSFNGHIYHIRPLGMVHSRPLLHQRLFNSDDDCRPHIEEVSDQILEKCDDLPLAILLTSGLLANTERTEHLWNHMADSIGCA	no	1,6,4,10,3,12,2,8,7,9,9,12	yes	4.2e-24	0.52	NA	NA	NA	NA	NA	NA	NA	NA	NA	NA	NA
Hordeum vulgare	HORVU0Hr1G015230.1	CNL	partial	HORVU0Hr1G015230.1:79	HORVU0Hr1G015230.1:543	SANMGSIPIVSLVGHGGMGKTTLAQSICETSEIRSCFTVVWVTVSTTFDATSVTSKILECVTGVKPHTDQLEPLQRLLQGIMERLSFLLVLDDVWEDKKRNEWEKLFAPFRKLNNRSKILLTTRMRSVASMATHVMNVKNDECLTLGGLKEDENLELFNHHVYSGLNPQEYEDLKSIGEQIARKLGGCPLVTKVASGHLHDIMEFDYWKNF	no	16,1,6,4,5,10,3,12,2,8,7	NA	7.1e-39	NA	NA	NA	NA	NA	NA	NA	NA	NA	NA	NA	NA
Hordeum vulgare	HORVU0Hr1G015230.2	CNL	partial	HORVU0Hr1G015230.2:50	HORVU0Hr1G015230.2:377	SANMGSIPIVSLVGHGGMGKTTLAQSICETSEIRSCFTVVWVTVSTTFDATSVTSKILECVTGVKPHTDQLEPLQRLLQGIMERLSFLLVLDDVWEDKKRNEWEKLFAPFRKLNNRSKILLTTRMRSVASMATHVMNVKNDECLTLGGLKEDENLELFNHHVYSGLNPQEYEDLKSIGEQIARKLGGCPLVTKVASGHLHDIMEFDYWKNF	no	1,6,4,5,10,3,12,2,8,7	NA	3.8e-39	NA	NA	NA	NA	NA	NA	NA	NA	NA	NA	NA	NA
Hordeum vulgare	HORVU0Hr1G015280.4	NA	partial	HORVU0Hr1G015280.4:120	HORVU0Hr1G015280.4:466	NA	no	11,11,9,11,11,12,9	NA	NA	1.8e-32	0.0009	2.4e-13	NA	NA	NA	NA	NA	NA	NA	NA	NA
Hordeum vulgare	HORVU0Hr1G017790.1	CNL	partial	HORVU0Hr1G017790.1:52	HORVU0Hr1G017790.1:417	NA	no	4,5,10,3,12,2,8,7,11,9,11	NA	1.1e-23	1.9e-05	NA	NA	NA	NA	NA	NA	NA	NA	NA	NA	NA
Hordeum vulgare	HORVU0Hr1G017960.1	CNL	partial	HORVU0Hr1G017960.1:15	HORVU0Hr1G017960.1:250	PVKQQQPKIITIVGPGGMGKTTIANQVYQELKGQFMCQAFISVSRNPDMMNILITILSQLDKNGFVDTKAGSIQQLLSNISNFLVDRRHGSNKQVWREHNLEPVNSRYT	no	17,16,1,6	NA	2.4e-12	NA	NA	NA	NA	NA	NA	NA	NA	NA	NA	NA	NA
Hordeum vulgare	HORVU0Hr1G017960.2	CNL	partial	HORVU0Hr1G017960.2:15	HORVU0Hr1G017960.2:250	PVKQQQPKIITIVGPGGMGKTTIANQVYQELKGQFMCQAFISVSRNPDMMNILITILSQLDKNGFVDTKAGSIQQLLSNISNFLVDRRYYLYPFLLIALKCI	no	17,16,1,6	NA	2.8e-13	NA	NA	NA	NA	NA	NA	NA	NA	NA	NA	NA	NA
Hordeum vulgare	HORVU0Hr1G017960.3	CNL	partial	HORVU0Hr1G017960.3:15	HORVU0Hr1G017960.3:250	PVKQQQPKIITIVGPGGMGKTTIANQVYQELKGQFMCQAFISVSRNPDMMNILITILSQLDKNGFVDTKAGSIQQLLSNISNFLVDRRYYLYPFLLIALKCI	no	17,16,1,6	NA	2.8e-13	NA	NA	NA	NA	NA	NA	NA	NA	NA	NA	NA	NA
Hordeum vulgare	HORVU0Hr1G017960.4	CNL	partial	HORVU0Hr1G017960.4:15	HORVU0Hr1G017960.4:250	PVKQQQPKIITIVGPGGMGKTTIANQVYQELKGQFMCQAFISVSRNPDMMNILITILSQLDKNGFVDTKAGSIQQLLSNISNFLVDRRYYLYPFLLIALKCI	no	17,16,1,6	NA	2.8e-13	NA	NA	NA	NA	NA	NA	NA	NA	NA	NA	NA	NA
Hordeum vulgare	HORVU0Hr1G017960.5	CNL	partial	HORVU0Hr1G017960.5:15	HORVU0Hr1G017960.5:250	PVKQQQPKIITIVGPGGMGKTTIANQVYQELKGQFMCQAFISVSRNPDMMNILITILSQLDKNGFVDTKAGSIQQLLSNISNFLVDRRYYLYPFLLIALKCI	no	17,16,1,6	NA	2.8e-13	NA	NA	NA	NA	NA	NA	NA	NA	NA	NA	NA	NA
Hordeum vulgare	HORVU0Hr1G017960.6	CNL	partial	HORVU0Hr1G017960.6:15	HORVU0Hr1G017960.6:250	PVKQQQPKIITIVGPGGMGKTTIANQVYQELKGQFMCQAFISVSRNPDMMNILITILSQLDKNGFVDTK	no	17,16,1,6	NA	1.5e-10	NA	NA	NA	NA	NA	NA	NA	NA	NA	NA	NA	NA
Hordeum vulgare	HORVU0Hr1G017960.7	CNL	partial	HORVU0Hr1G017960.7:15	HORVU0Hr1G017960.7:250	PVKQQQPKIITIVGPGGMGKTTIANQVYQELKGQFMCQAFISVSRNPDMMNILITILSQLDKNGFVDTKAGSIQQLLSNISNFLVDRRN	no	17,16,1,6	NA	2.2e-12	NA	NA	NA	NA	NA	NA	NA	NA	NA	NA	NA	NA
Hordeum vulgare	HORVU0Hr1G018710.1	CNL	partial	HORVU0Hr1G018710.1:16	HORVU0Hr1G018710.1:587	EARINSSHVVSVWGMAGVGKSSLVRHFYFDMMLHVYQFDKFNWVDVSYPFNLRSFLRSLLSDFESEKDPVQECRHLLEQHKCLVVIDCLHSKEEWDLIQAALVSRASKSVIIVITTEASIAAYCTERTELMLNVQGLQALAAFNFFKKEVCKKNPLSPLKDNKHMYDLEELILKCGGFPGVITAIAGLLATKADAWKDAADSLNRRFMHHL	no	17,16,6,4,1,6,4,3	NA	7.3e-39	NA	NA	NA	NA	NA	NA	NA	NA	NA	NA	NA	NA
Hordeum vulgare	HORVU0Hr1G018710.2	CNL	partial	HORVU0Hr1G018710.2:16	HORVU0Hr1G018710.2:303	NA	no	17,16,6,4	NA	1.3e-10	NA	NA	NA	NA	NA	NA	NA	NA	NA	NA	NA	NA
Hordeum vulgare	HORVU0Hr1G018710.3	CNL	partial	HORVU0Hr1G018710.3:16	HORVU0Hr1G018710.3:587	EARINSSHVVSVWGMAGVGKSSLVRHFYFDMMLHVYQFDKFNWVDVSYPFNLRSFLRSLLSDFESEKDPVQECRHLLEQHKCLVVIDCLHSKEEWDLIQAALVSRASKSVIIVITTEASIAAYCTERTELMLNVQGLQALAAFNFFKKEVCKKNPLSPLKDNKHMYDLEELILKCGGFPGVITAIAGLLATKADAWKDAADSLNRRFMHHL	no	17,16,6,4,1,6,4,3	NA	7.3e-39	NA	NA	NA	NA	NA	NA	NA	NA	NA	NA	NA	NA
Hordeum vulgare	HORVU0Hr1G018710.4	CNL	partial	HORVU0Hr1G018710.4:16	HORVU0Hr1G018710.4:303	NA	no	17,16,6,4	NA	1.3e-10	NA	NA	NA	NA	NA	NA	NA	NA	NA	NA	NA	NA
Hordeum vulgare	HORVU0Hr1G018710.5	CNL	partial	HORVU0Hr1G018710.5:32	HORVU0Hr1G018710.5:217	EARINSSHVVSVWGMAGVGKSSLVRHFYFDMMLHVYQFDKFNWVDVSYPFNLRSFLRSLLSDFESEKDPVQECRHLLEQHKCLVVIDCLHSKEEWDLIQAALVSRASKSVIIVITTEASIAAYCTERTELMLNVQGLQALAAFNFFKKEVCKKNPLSPLKDNKHMYDLEELILKCGGFPGVITAIAGLLATKADAWKDAADSLNRRFMHHL	no	1,6,4,3	NA	9.5e-28	NA	NA	NA	NA	NA	NA	NA	NA	NA	NA	NA	NA
Hordeum vulgare	HORVU0Hr1G022390.1	CNL	partial	HORVU0Hr1G022390.1:17	HORVU0Hr1G022390.1:358	NA	no	5,10,3,12,2,8,7,9,9	NA	3.3e-16	NA	NA	0.86	NA	NA	NA	NA	NA	NA	NA	NA	NA
Hordeum vulgare	HORVU0Hr1G022650.1	CNL	partial	HORVU0Hr1G022650.1:148	HORVU0Hr1G022650.1:581	NA	no	2,8,7,11,9,9	NA	NA	NA	NA	NA	NA	NA	NA	NA	NA	NA	NA	NA	NA
Hordeum vulgare	HORVU0Hr1G027280.1	CNL	complete	HORVU0Hr1G027280.1:77	HORVU0Hr1G027280.1:1253	ESSTTLYSGLAIVGVGGMGKSTLAQLVYNDKRVKEYFDVTMWVSISRKLDVRRHTREIIESASQRECPLIDNLDILQHKLTDILQESGKFLLVLDDVWFEPESESEWDQLLAPLISQQMGSKVLVTSRRDRFPSTLYCEVCPLENMEDAEFLALFKHHAFSGPEIRNPQLRKRLRNFAEKIAKRLGQSPLVAKVVGSQLKGKTDITAWKDA	no	16,1,6,4,5,10,3,2,8,7,9,9,11,11,11,11	yes	4.1e-33	NA	NA	NA	NA	188	376	730	no	no	yes	NA	NA
Hordeum vulgare	HORVU0Hr1G030390.1	CNL	complete	HORVU0Hr1G030390.1:77	HORVU0Hr1G030390.1:1253	ESSTTLYSGLAIVGVGGMGKSTLAQLVYNDKRVKEYFDVTMWVSISRKLDVRRHTREIIESASQRECPLIDNLDILQHKLTDILQESGKFLLVLDDVWFEPESESEWDQLLAPLISQQMGSKVLVTSRRDRFPSTLYCEVCPLENMEDAEFLALFKHHAFSGPEIRNPQLRKRLRNFAEKIAKRLGQSPLVAKVVGSQLKGKTDITAWKDA	no	16,1,6,4,5,10,3,2,8,7,9,9,11,11,11,11	yes	4.1e-33	NA	NA	NA	NA	188	376	730	no	no	yes	NA	NA
Hordeum vulgare	HORVU0Hr1G031060.1	CNL	partial	HORVU0Hr1G031060.1:14	HORVU0Hr1G031060.1:463	NSNQSNLSILPIVGMGGLGKTTLTQLVYNDTRIKEHFQLRVWLCVSENFDQMKLTKETIESVASEFESVISGVSSVTTNMNLLQEDLSKKLKGKRFLLVLDDVWNEDPEKWDTYRRALLTGGKGSRIVVTTRNKNVGKLMGGMTPYYLNQLSDNDCWFLFRSYAFVDGNSDAHPNLEMIGKEIVKKLKGLPLAAKAIGSLLCSQDTEDDWK	no	17,16,1,6,4,5,10,3,12,2	NA	9.6e-50	NA	NA	NA	NA	NA	NA	NA	NA	NA	NA	NA	NA
Hordeum vulgare	HORVU0Hr1G031070.1	NA	partial	HORVU0Hr1G031070.1:81	HORVU0Hr1G031070.1:430	NA	no	9,9,11,11,11,11,11	NA	NA	7.1e-11	NA	NA	NA	NA	NA	NA	NA	NA	NA	NA	NA
Hordeum vulgare	HORVU0Hr1G032100.1	NA	partial	HORVU0Hr1G032100.1:370	HORVU0Hr1G032100.1:854	NA	no	20,11,11,9,11,11	yes	NA	2.9e-09	NA	0.077	NA	NA	NA	NA	NA	NA	NA	NA	NA
Hordeum vulgare	HORVU0Hr1G032250.1	CNL	complete	HORVU0Hr1G032250.1:93	HORVU0Hr1G032250.1:1129	NSNQSNLSILPIVGMGGLGKTTLTQLVYNDTRIKEHFQLRVWLCVSENFDQMKLTKETIESVASEFESVISGVSSVTTNMNLLQEDLSKKLKGKRFLLVLDDVWNEDPEKWDTYRRALLTGGKGSRIVVTTRNKNVGKLMGGMTPYYLNQLSDNDCWFLFRSYAFVDGNSDAHPNLEMIGKEIVKKLKGLPLAAKAIGSLLCSQDTEDDWK	no	17,16,1,6,4,5,10,3,12,2,8,7,9,9,11,11,11,11,11,11,11,11	yes	4.5e-49	3e-11	NA	NA	NA	254	375	580	no	no	NA	NA	NA
Hordeum vulgare	HORVU0Hr1G032250.2	CNL	complete	HORVU0Hr1G032250.2:93	HORVU0Hr1G032250.2:1129	NSNQSNLSILPIVGMGGLGKTTLTQLVYNDTRIKEHFQLRVWLCVSENFDQMKLTKETIESVASEFESVISGVSSVTTNMNLLQEDLSKKLKGKRFLLVLDDVWNEDPEKWDTYRRALLTGGKGSRIVVTTRNKNVGKLMGGMTPYYLNQLSDNDCWFLFRSYAFVDGNSDAHPNLEMIGKEIVKKLKGLPLAAKAIGSLLCSQDTEDDWK	no	17,16,1,6,4,5,10,3,12,2,8,7,9,9,11,11,11,11,11,11,11,11	yes	4.5e-49	3e-11	NA	NA	NA	254	375	580	no	no	NA	NA	NA
Hordeum vulgare	HORVU0Hr1G032250.3	CNL	complete	HORVU0Hr1G032250.3:14	HORVU0Hr1G032250.3:938	NSNQSNLSILPIVGMGGLGKTTLTQLVYNDTRIKEHFQLRVWLCVSENFDQMKLTKETIESVASEFESVISGVSSVTTNMNLLQEDLSKKLKGKRFLLVLDDVWNEDPEKWDTYRRALLTGGKGSRIVVTTRNKNVGKLMGGMTPYYLNQLSDNDCWFLFRSYAFVDGNSDAHPNLEMIGKEIVKKLKGLPLAAKAIGSLLCSQDTEDDWK	no	17,16,1,6,4,5,10,3,12,2,8,7,9,9,11,11,11,11,11,11	yes	4.7e-49	2.5e-07	NA	NA	NA	175	375	468	no	no	yes	NA	NA
Hordeum vulgare	HORVU0Hr1G037720.1	CNL	partial	HORVU0Hr1G037720.1:108	HORVU0Hr1G037720.1:376	EARINSSHVVSVWGMAGVGKSSLVRHFYFDMMLHVYQFDKFNWVDVSYPFNLRSFLRSLLSDFESEKDPVQECRHLLEQHKCLVVIDCLHSKEEWDLIQAALVSRASKSVIIVITTEASIAAYCTERTELMLNVQGLQALAAFNFFKKEVC	no	6,4,1,6,4	NA	7.9e-31	NA	NA	NA	NA	NA	NA	NA	NA	NA	NA	NA	NA
Hordeum vulgare	HORVU0Hr1G037720.2	CNL	partial	HORVU0Hr1G037720.2:63	HORVU0Hr1G037720.2:331	EARINSSHVVSVWGMAGVGKSSLVRHFYFDMMLHVYQFDKFNWVDVSYPFNLRSFLRSLLSDFESEKDPVQECRHLLEQHKCLVVIDCLHSKEEWDLIQAALVSRASKSVIIVITTEASIAAYCTERTELMLNVQGLQALAAFNFFKKEVHNLVGGLVPLNKGTN	no	6,4,1,6,4	NA	1e-30	NA	NA	NA	NA	NA	NA	NA	NA	NA	NA	NA	NA
Hordeum vulgare	HORVU0Hr1G039660.1	CNL	partial	HORVU0Hr1G039660.1:52	HORVU0Hr1G039660.1:682	NA	no	4,5,3,2,8,7,9,9,11,11,9,19,11,11,11	yes	4.8e-29	5.6e-08	NA	0.32	NA	0	309	534	TRUE	no	NA	NA	NA
Hordeum vulgare	HORVU0Hr1G039660.10	CNL	partial	HORVU0Hr1G039660.10:181	HORVU0Hr1G039660.10:579	RGGEGAHVLFAIVGTIGVGKSTLARKIYHEMRGRFRIRLWVNISNDSRHITIWSGERFKRRAGMSEQREVLRNYLNGSTRNLLLVIDNVSKADDWNQLLAANEAFRRCGCKVIVTTRDENVARTMGVTHFHRVKCLNGDDGWLLLHKTANLGGTVTTRNIQDVGRSIVQKCSGVPMAIRTIGWNLRGRSREDEWESIHSQDLISSYPGIRD	no	1,4,5,3,2,8,7,9,9	NA	4.3e-39	3.6e-07	NA	0.3	NA	NA	NA	NA	NA	NA	NA	NA	NA
Hordeum vulgare	HORVU0Hr1G039660.2	CNL	partial	HORVU0Hr1G039660.2:52	HORVU0Hr1G039660.2:682	NA	no	4,5,3,2,8,7,9,9,11,11,9,19,11,11,11	yes	4.8e-29	5.6e-08	NA	0.32	NA	0	309	534	TRUE	no	NA	NA	NA
Hordeum vulgare	HORVU0Hr1G039660.3	CNL	partial	HORVU0Hr1G039660.3:52	HORVU0Hr1G039660.3:682	NA	no	4,5,3,2,8,7,9,9,11,11,9,19,11,11,11	yes	4.8e-29	5.6e-08	NA	0.32	NA	0	309	534	TRUE	no	NA	NA	NA
Hordeum vulgare	HORVU0Hr1G039660.4	CNL	partial	HORVU0Hr1G039660.4:52	HORVU0Hr1G039660.4:682	NA	no	4,5,3,2,8,7,9,9,11,11,9,19,11,11,11	yes	4.8e-29	5.6e-08	NA	0.32	NA	0	309	534	TRUE	no	NA	NA	NA
Hordeum vulgare	HORVU0Hr1G039660.5	CNL	partial	HORVU0Hr1G039660.5:52	HORVU0Hr1G039660.5:682	NA	no	4,5,3,2,8,7,9,9,11,11,9,19,11,11,11	yes	4.8e-29	5.6e-08	NA	0.32	NA	0	309	534	TRUE	no	NA	NA	NA
Hordeum vulgare	HORVU0Hr1G039660.6	CNL	partial	HORVU0Hr1G039660.6:52	HORVU0Hr1G039660.6:682	NA	no	4,5,3,2,8,7,9,9,11,11,9,19,11,11,11	yes	4.8e-29	5.6e-08	NA	0.32	NA	0	309	534	TRUE	no	NA	NA	NA
Hordeum vulgare	HORVU0Hr1G039660.7	CNL	partial	HORVU0Hr1G039660.7:52	HORVU0Hr1G039660.7:682	NA	no	4,5,3,2,8,7,9,9,11,11,9,19,11,11,11	yes	4.8e-29	5.6e-08	NA	0.32	NA	0	309	534	TRUE	no	NA	NA	NA
Hordeum vulgare	HORVU0Hr1G039660.8	CNL	complete	HORVU0Hr1G039660.8:13	HORVU0Hr1G039660.8:889	RGGEGAHVLFAIVGTIGVGKSTLARKIYHEMRGRFRIRLWVNISNDSRHITIWSGERFKRRAGMSEQREVLRNYLNGSTRNLLLVIDNVSKADDWNQLLAANEAFRRCGCKVIVTTRDENVARTMGVTHFHRVKCLNGDDGWLLLHKTANLGGTVTTRNIQDVGRSIVQKCSGVPMAIRTIGWNLRGRSREDEWESIHSQDLISSYPGIRD	no	17,16,1,4,5,3,2,8,7,9,9,11,11,9,19,11,11,11	yes	1.1e-38	1.3e-07	NA	NA	NA	163	353	534	no	no	NA	NA	NA
Hordeum vulgare	HORVU0Hr1G039660.9	CNL	complete	HORVU0Hr1G039660.9:13	HORVU0Hr1G039660.9:889	RGGEGAHVLFAIVGTIGVGKSTLARKIYHEMRGRFRIRLWVNISNDSRHITIWSGERFKRRAGMSEQREVLRNYLNGSTRNLLLVIDNVSKADDWNQLLAANEAFRRCGCKVIVTTRDENVARTMGVTHFHRVKCLNGDDGWLLLHKTANLGGTVTTRNIQDVGRSIVQKCSGVPMAIRTIGWNLRGRSREDEWESIHSQDLISSYPGIRD	no	17,16,1,4,5,3,2,8,7,9,9,11,11,9,19,11,11,11	yes	1.1e-38	1.3e-07	NA	NA	NA	163	353	534	no	no	yes	NA	NA
Hordeum vulgare	HORVU1Hr1G000210.1	CNL	partial	HORVU1Hr1G000210.1:490	HORVU1Hr1G000210.1:1101	PCSSPCYFVIGIYGVAGSGKTTFAGYIRDYINEECKEDKLFDTIMCIHVSETFSVDDVFHEMLKDITKDRHSNISDREELEEKLKEALCGKRFFLILDDLWVKNKHDSQLEELISPLIVGAKGSKILVTARTKEAAGALCCDELIEMPGLDEDQYLKMFMHYALSGKSIVVKEFEQVGREIAKKLHRSPIAAVTVAGRLVANPNISFWKNV	no	1,6,4,5,3,2,8,7,9,19	yes	8.6e-29	NA	NA	NA	NA	NA	NA	NA	NA	NA	NA	NA	NA
Hordeum vulgare	HORVU1Hr1G000210.2	CNL	partial	HORVU1Hr1G000210.2:489	HORVU1Hr1G000210.2:1100	PCSSPCYFVIGIYGVAGSGKTTFAGYIRDYINEECKEDKLFDTIMCIHVSETFSVDDVFHEMLKDITKDRHSNISDREELEEKLKEALCGKRFFLILDDLWVKNKHDSQLEELISPLIVGAKGSKILVTARTKEAAGALCCDELIEMPGLDEDQYLKMFMHYALSGKSIVVKEFEQVGREIAKKLHRSPIAAVTVAGRLVANPNISFWKNV	no	1,6,4,5,3,2,8,7,9,19	yes	8.6e-29	NA	NA	NA	NA	NA	NA	NA	NA	NA	NA	NA	NA
Hordeum vulgare	HORVU1Hr1G000210.3	CNL	partial	HORVU1Hr1G000210.3:489	HORVU1Hr1G000210.3:1100	PCSSPCYFVIGIYGVAGSGKTTFAGYIRDYINEECKEDKLFDTIMCIHVSETFSVDDVFHEMLKDITKDRHSNISDREELEEKLKEALCGKRFFLILDDLWVKNKHDSQLEELISPLIVGAKGSKILVTARTKEAAGALCCDELIEMPGLDEDQYLKMFMHYALSGKSIVVKEFEQVGREIAKKLHRSPIAAVTVAGRLVANPNISFWKNV	no	1,6,4,5,3,2,8,7,9,19	yes	8.6e-29	NA	NA	NA	NA	NA	NA	NA	NA	NA	NA	NA	NA
Hordeum vulgare	HORVU1Hr1G000210.4	CNL	partial	HORVU1Hr1G000210.4:489	HORVU1Hr1G000210.4:1100	PCSSPCYFVIGIYGVAGSGKTTFAGYIRDYINEECKEDKLFDTIMCIHVSETFSVDDVFHEMLKDITKDRHSNISDREELEEKLKEALCGKRFFLILDDLWVKNKHDSQLEELISPLIVGAKGSKILVTARTKEAAGALCCDELIEMPGLDEDQYLKMFMHYALSGKSIVVKEFEQVGREIAKKLHRSPIAAVTVAGRLVANPNISFWKNV	no	1,6,4,5,3,2,8,7,9,19	yes	8.6e-29	NA	NA	NA	NA	NA	NA	NA	NA	NA	NA	NA	NA
Hordeum vulgare	HORVU1Hr1G000210.5	CNL	partial	HORVU1Hr1G000210.5:489	HORVU1Hr1G000210.5:925	PCSSPCYFVIGIYGVAGSGKTTFAGYIRDYINEECKEDKLFDTIMCIHVSETFSVDDVFHEMLKDITKDRHSNISDREELEEKLKEALCGKRFFLILDDLWVKNKHDSQLEELISPLIVGAKGSKILVTARTKEAAGALCCDELIEMPGLDEDQYLKMFMHYALSGKSIVVKEFEQVGREIAKKLHRSPIAAVTVAGRLVANPNISFWKNV	no	1,6,4,5,3,2,8,7,9	yes	5.6e-29	NA	NA	NA	NA	NA	NA	NA	NA	NA	NA	NA	NA
Hordeum vulgare	HORVU1Hr1G000210.6	CNL	partial	HORVU1Hr1G000210.6:489	HORVU1Hr1G000210.6:1100	PCSSPCYFVIGIYGVAGSGKTTFAGYIRDYINEECKEDKLFDTIMCIHVSETFSVDDVFHEMLKDITKDRHSNISDREELEEKLKEALCGKRFFLILDDLWVKNKHDSQLEELISPLIVGAKGSKILVTARTKEAAGALCCDELIEMPGLDEDQYLKMFMHYALSGKSIVVKEFEQVGREIAKKLHRSPIAAVTVAGRLVANPNISFWKNV	no	1,6,4,5,3,2,8,7,9,19	yes	8.6e-29	NA	NA	NA	NA	NA	NA	NA	NA	NA	NA	NA	NA
Hordeum vulgare	HORVU1Hr1G000210.7	CNL	partial	HORVU1Hr1G000210.7:104	HORVU1Hr1G000210.7:715	PCSSPCYFVIGIYGVAGSGKTTFAGYIRDYINEECKEDKLFDTIMCIHVSETFSVDDVFHEMLKDITKDRHSNISDREELEEKLKEALCGKRFFLILDDLWVKNKHDSQLEELISPLIVGAKGSKILVTARTKEAAGALCCDELIEMPGLDEDQYLKMFMHYALSGKSIVVKEFEQVGREIAKKLHRSPIAAVTVAGRLVANPNISFWKNV	no	1,6,4,5,3,2,8,7,9,19	yes	5.2e-29	NA	NA	NA	NA	NA	NA	NA	NA	NA	NA	NA	NA
Hordeum vulgare	HORVU1Hr1G000210.8	CNL	partial	HORVU1Hr1G000210.8:489	HORVU1Hr1G000210.8:1100	PCSSPCYFVIGIYGVAGSGKTTFAGYIRDYINEECKEDKLFDTIMCIHVSETFSVDDVFHEMLKDITKDRHSNISDREELEEKLKEALCGKRFFLILDDLWVKNKHDSQLEELISPLIVGAKGSKILVTARTKEAAGALCCDELIEMPGLDEDQYLKMFMHYALSGKSIVVKEFEQVGREIAKKLHRSPIAAVTVAGRLVANPNISFWKNV	no	1,6,4,5,3,2,8,7,9,19	yes	8.6e-29	NA	NA	NA	NA	NA	NA	NA	NA	NA	NA	NA	NA
Hordeum vulgare	HORVU1Hr1G000210.9	CNL	partial	HORVU1Hr1G000210.9:104	HORVU1Hr1G000210.9:357	PCSSPCYFVIGIYGVAGSGKTTFAGYIRDYINEECKEDKLFDTIMCIHVSETFSVDDVFHEMLKDITKDRHSNISDREELEEKLKEALCGKRFFLILDDLWVKNKHDSQLEELISPLIVGAKGSKILVTARTKEAAGALCCDELIEMPGLDEDQYLKMFMHYALSGKSIVVKEFEQVGREIAKKLHRSPIAAVTVAGRLVANPNISFWKNV	no	1,6,4,5,3,2	NA	7.7e-30	NA	NA	NA	NA	NA	NA	NA	NA	NA	NA	NA	NA
Hordeum vulgare	HORVU1Hr1G000250.1	CNL	partial	HORVU1Hr1G000250.1:412	HORVU1Hr1G000250.1:1072	PSSSPCYSVIGIYGIAGSGKTTFAGYIQDYINEECKEDKLFDTIICIHVSETFTVEVIFQEMLKDITANSHSNISDHGVLNNKLKEALRGKRFFLILDDLWVKNKNDQQLEELISPLNVGLKGSKILVTARTREAAGALCPDELIAMPDLAEDQYIKMFMHYALGGKGVPAKEFEQVGIEIAKKLHRSPIAAVTVAGRLGANPNISFWKNV	no	1,6,4,5,3,2,8,7,9,19,9,11	yes	7.4e-26	NA	NA	NA	NA	NA	NA	NA	NA	NA	NA	NA	NA
Hordeum vulgare	HORVU1Hr1G000250.2	CNL	partial	HORVU1Hr1G000250.2:412	HORVU1Hr1G000250.2:1072	PSSSPCYSVIGIYGIAGSGKTTFAGYIQDYINEECKEDKLFDTIICIHVSETFTVEVIFQEMLKDITANSHSNISDHGVLNNKLKEALRGKRFFLILDDLWVKNKNDQQLEELISPLNVGLKGSKILVTARTREAAGALCPDELIAMPDLAEDQYIKMFMHYALGGKGVPAKEFEQVGIEIAKKLHRSPIAAVTVAGRLGANPNISFWKNV	no	1,6,4,5,3,2,8,7,9,19,9,11	yes	7.4e-26	NA	NA	NA	NA	NA	NA	NA	NA	NA	NA	NA	NA
Hordeum vulgare	HORVU1Hr1G000250.3	CNL	partial	HORVU1Hr1G000250.3:412	HORVU1Hr1G000250.3:1072	PSSSPCYSVIGIYGIAGSGKTTFAGYIQDYINEECKEDKLFDTIICIHVSETFTVEVIFQEMLKDITANSHSNISDHGVLNNKLKEALRGKRFFLILDDLWVKNKNDQQLEELISPLNVGLKGSKILVTARTREAAGALCPDELIAMPDLAEDQYIKMFMHYALGGKGVPAKEFEQVGIEIAKKLHRSPIAAVTVAGRLGANPNISFWKNV	no	1,6,4,5,3,2,8,7,9,19,9,11	yes	7.4e-26	NA	NA	NA	NA	NA	NA	NA	NA	NA	NA	NA	NA
Hordeum vulgare	HORVU1Hr1G000250.4	CNL	partial	HORVU1Hr1G000250.4:412	HORVU1Hr1G000250.4:1072	PSSSPCYSVIGIYGIAGSGKTTFAGYIQDYINEECKEDKLFDTIICIHVSETFTVEVIFQEMLKDITANSHSNISDHGVLNNKLKEALRGKRFFLILDDLWVKNKNDQQLEELISPLNVGLKGSKILVTARTREAAGALCPDELIAMPDLAEDQYIKMFMHYALGGKGVPAKEFEQVGIEIAKKLHRSPIAAVTVAGRLGANPNISFWKNV	no	1,6,4,5,3,2,8,7,9,19,9,11	yes	7.4e-26	NA	NA	NA	NA	NA	NA	NA	NA	NA	NA	NA	NA
Hordeum vulgare	HORVU1Hr1G000250.5	CNL	partial	HORVU1Hr1G000250.5:125	HORVU1Hr1G000250.5:785	PSSSPCYSVIGIYGIAGSGKTTFAGYIQDYINEECKEDKLFDTIICIHVSETFTVEVIFQEMLKDITANSHSNISDHGVLNNKLKEALRGKRFFLILDDLWVKNKNDQQLEELISPLNVGLKGSKILVTARTREAAGALCPDELIAMPDLAEDQYIKMFMHYALGGKGVPAKEFEQVGIEIAKKLHRSPIAAVTVAGRLGANPNISFWKNV	no	1,6,4,5,3,2,8,7,9,19,9,11	yes	4.7e-26	NA	NA	NA	NA	NA	NA	NA	NA	NA	NA	NA	NA
Hordeum vulgare	HORVU1Hr1G000250.6	CNL	partial	HORVU1Hr1G000250.6:98	HORVU1Hr1G000250.6:758	PSSSPCYSVIGIYGIAGSGKTTFAGYIQDYINEECKEDKLFDTIICIHVSETFTVEVIFQEMLKDITANSHSNISDHGVLNNKLKEALRGKRFFLILDDLWVKNKNDQQLEELISPLNVGLKGSKILVTARTREAAGALCPDELIAMPDLAEDQYIKMFMHYALGGKGVPAKEFEQVGIEIAKKLHRSPIAAVTVAGRLGANPNISFWKNV	no	1,6,4,5,3,2,8,7,9,19,9,11	yes	4.1e-26	NA	NA	NA	NA	NA	NA	NA	NA	NA	NA	NA	NA
Hordeum vulgare	HORVU1Hr1G000250.7	CNL	partial	HORVU1Hr1G000250.7:412	HORVU1Hr1G000250.7:697	PSSSPCYSVIGIYGIAGSGKTTFAGYIQDYINEECKEDKLFDTIICIHVSETFTVEVIFQEMLKDITANSHSNISDHGVLNNKLKEALRGKRFFLILDDLWVKNKNDQQLEELISPLNVGLKGSKILVTARTREAAGALCPDELIAMPDLAEDQYIKMFMHYALGGKGVPAKEFEQVGIEIAKKLHRSPIAAVTVAGRLGANPNISFWKNV	no	1,6,4,5,3,2,8	NA	3.1e-26	NA	NA	NA	NA	NA	NA	NA	NA	NA	NA	NA	NA
Hordeum vulgare	HORVU1Hr1G000260.1	CNL	partial	HORVU1Hr1G000260.1:428	HORVU1Hr1G000260.1:1084	WRTSPFYSVIGIYGVAGSGKTTFARYICDYIKEECEENLFDTIMCIHVSETFSVDDIFHEMLKDITKDRHSDISDREDLVEKFKEALCGKRFFLVLDDVWVKNKHDPQMEELLSPLNVGLKGSKILVTARTKEAAGALCGDELIEMPDLDEDQYMKMFMHYALSGKSVTVKEFEQVGREIAKKLHRSLIAAVTVAGRLGANPNISFWKNVA	no	1,6,4,5,2,8,7,9,19,9,11	yes	3.1e-27	NA	NA	NA	NA	NA	NA	NA	NA	NA	NA	NA	NA
Hordeum vulgare	HORVU1Hr1G000260.2	CNL	partial	HORVU1Hr1G000260.2:428	HORVU1Hr1G000260.2:1084	WRTSPFYSVIGIYGVAGSGKTTFARYICDYIKEECEENLFDTIMCIHVSETFSVDDIFHEMLKDITKDRHSDISDREDLVEKFKEALCGKRFFLVLDDVWVKNKHDPQMEELLSPLNVGLKGSKILVTARTKEAAGALCGDELIEMPDLDEDQYMKMFMHYALSGKSVTVKEFEQVGREIAKKLHRSLIAAVTVAGRLGANPNISFWKNVA	no	1,6,4,5,2,8,7,9,19,9,11	yes	3.1e-27	NA	NA	NA	NA	NA	NA	NA	NA	NA	NA	NA	NA
Hordeum vulgare	HORVU1Hr1G000260.3	CNL	partial	HORVU1Hr1G000260.3:428	HORVU1Hr1G000260.3:1084	WRTSPFYSVIGIYGVAGSGKTTFARYICDYIKEECEENLFDTIMCIHVSETFSVDDIFHEMLKDITKDRHSDISDREDLVEKFKEALCGKRFFLVLDDVWVKNKHDPQMEELLSPLNVGLKGSKILVTARTKEAAGALCGDELIEMPDLDEDQYMKMFMHYALSGKSVTVKEFEQVGREIAKKLHRSLIAAVTVAGRLGANPNISFWKNVA	no	1,6,4,5,2,8,7,9,19,9,11	yes	3.1e-27	NA	NA	NA	NA	NA	NA	NA	NA	NA	NA	NA	NA
Hordeum vulgare	HORVU1Hr1G000260.4	CNL	partial	HORVU1Hr1G000260.4:428	HORVU1Hr1G000260.4:1084	WRTSPFYSVIGIYGVAGSGKTTFARYICDYIKEECEENLFDTIMCIHVSETFSVDDIFHEMLKDITKDRHSDISDREDLVEKFKEALCGKRFFLVLDDVWVKNKHDPQMEELLSPLNVGLKGSKILVTARTKEAAGALCGDELIEMPDLDEDQYMKMFMHYALSGKSVTVKEFEQVGREIAKKLHRSLIAAVTVAGRLGANPNISFWKNVA	no	1,6,4,5,2,8,7,9,19,9,11	yes	3.1e-27	NA	NA	NA	NA	NA	NA	NA	NA	NA	NA	NA	NA
Hordeum vulgare	HORVU1Hr1G000260.5	CNL	partial	HORVU1Hr1G000260.5:428	HORVU1Hr1G000260.5:1084	WRTSPFYSVIGIYGVAGSGKTTFARYICDYIKEECEENLFDTIMCIHVSETFSVDDIFHEMLKDITKDRHSDISDREDLVEKFKEALCGKRFFLVLDDVWVKNKHDPQMEELLSPLNVGLKGSKILVTARTKEAAGALCGDELIEMPDLDEDQYMKMFMHYALSGKSVTVKEFEQVGREIAKKLHRSLIAAVTVAGRLGANPNISFWKNVA	no	1,6,4,5,2,8,7,9,19,9,11	yes	3.1e-27	NA	NA	NA	NA	NA	NA	NA	NA	NA	NA	NA	NA
Hordeum vulgare	HORVU1Hr1G000260.6	CNL	partial	HORVU1Hr1G000260.6:428	HORVU1Hr1G000260.6:741	WRTSPFYSVIGIYGVAGSGKTTFARYICDYIKEECEENLFDTIMCIHVSETFSVDDIFHEMLKDITKDRHSDISDREDLVEKFKEALCGKRFFLVLDDVWVKNKHDPQMEELLSPLNVGLKGSKILVTARTKEAAGALCGDELIEMPDLDEDQYMKMFMHYALSGKSVTVKEFEQVGREIAKKLHRSLIAAVTVAGRLGANPNISFWKNVA	no	1,6,4,5,2,8,7	yes	1.6e-27	NA	NA	NA	NA	NA	NA	NA	NA	NA	NA	NA	NA
Hordeum vulgare	HORVU1Hr1G000260.7	CNL	partial	HORVU1Hr1G000260.7:428	HORVU1Hr1G000260.7:1084	WRTSPFYSVIGIYGVAGSGKTTFARYICDYIKEECEENLFDTIMCIHVSETFSVDDIFHEMLKDITKDRHSDISDREDLVEKFKEALCGKRFFLVLDDVWVKNKHDPQMEELLSPLNVGLKGSKILVTARTKEAAGALCGDELIEMPDLDEDQYMKMFMHYALSGKSVTVKEFEQVGREIAKKLHRSLIAAVTVAGRLGANPNISFWKNVA	no	1,6,4,5,2,8,7,9,19,9,11	yes	3.1e-27	NA	NA	NA	NA	NA	NA	NA	NA	NA	NA	NA	NA
Hordeum vulgare	HORVU1Hr1G000260.8	CNL	partial	HORVU1Hr1G000260.8:428	HORVU1Hr1G000260.8:1084	WRTSPFYSVIGIYGVAGSGKTTFARYICDYIKEECEENLFDTIMCIHVSETFSVDDIFHEMLKDITKDRHSDISDREDLVEKFKEALCGKRFFLVLDDVWVKNKHDPQMEELLSPLNVGLKGSKILVTARTKEAAGALCGDELIEMPDLDEDQYMKMFMHYALSGKSVTVKEFEQVGREIAKKLHRSLIAAVTVAGRLGANPNISFWKNVA	no	1,6,4,5,2,8,7,9,19,9,11	yes	3.1e-27	NA	NA	NA	NA	NA	NA	NA	NA	NA	NA	NA	NA
Hordeum vulgare	HORVU1Hr1G000260.9	CNL	partial	HORVU1Hr1G000260.9:428	HORVU1Hr1G000260.9:1084	WRTSPFYSVIGIYGVAGSGKTTFARYICDYIKEECEENLFDTIMCIHVSETFSVDDIFHEMLKDITKDRHSDISDREDLVEKFKEALCGKRFFLVLDDVWVKNKHDPQMEELLSPLNVGLKGSKILVTARTKEAAGALCGDELIEMPDLDEDQYMKMFMHYALSGKSVTVKEFEQVGREIAKKLHRSLIAAVTVAGRLGANPNISFWKNVA	no	1,6,4,5,2,8,7,9,19,9,11	yes	3.1e-27	NA	NA	NA	NA	NA	NA	NA	NA	NA	NA	NA	NA
Hordeum vulgare	HORVU1Hr1G000830.1	CNL	complete	HORVU1Hr1G000830.1:16	HORVU1Hr1G000830.1:1374	QAGNADLAVVPIVGMGGLGKTTLAQLIYNEPKIQKHFQLQLWVCVSDTFDVNSIAKSIVEASPKKNYDTEKPPLDRLQKLLSGKRYLLVLDDVWNREVQKWERLKVCLQHGGMGSAVLTTTRDKQVAEIMGADITYNLNVLKDDFIKEIIVARAFSSENDKPPKLLKLVGEIVKRCRGSPLAATALGSVLRTKTSVEEWEAISSRSSICTD	no	17,16,1,6,4,5,3,12,2,8,7,9,11,11,11,11,11,11,11,11,11,11,11,11,11	yes	3e-50	2.5e-08	NA	0.29	NA	185	379	866	no	no	NA	NA	NA
Hordeum vulgare	HORVU1Hr1G000830.2	CNL	complete	HORVU1Hr1G000830.2:16	HORVU1Hr1G000830.2:1374	QAGNADLAVVPIVGMGGLGKTTLAQLIYNEPKIQKHFQLQLWVCVSDTFDVNSIAKSIVEASPKKNYDTEKPPLDRLQKLLSGKRYLLVLDDVWNREVQKWERLKVCLQHGGMGSAVLTTTRDKQVAEIMGADITYNLNVLKDDFIKEIIVARAFSSENDKPPKLLKLVGEIVKRCRGSPLAATALGSVLRTKTSVEEWEAISSRSSICTD	no	17,16,1,6,4,5,3,12,2,8,7,9,11,11,11,11,11,11,11,11,11,11,11,11,11	yes	3e-50	2.5e-08	NA	0.29	NA	185	379	866	no	no	NA	NA	NA
Hordeum vulgare	HORVU1Hr1G000830.3	CNL	complete	HORVU1Hr1G000830.3:16	HORVU1Hr1G000830.3:1374	QAGNADLAVVPIVGMGGLGKTTLAQLIYNEPKIQKHFQLQLWVCVSDTFDVNSIAKSIVEASPKKNYDTEKPPLDRLQKLLSGKRYLLVLDDVWNREVQKWERLKVCLQHGGMGSAVLTTTRDKQVAEIMGADITYNLNVLKDDFIKEIIVARAFSSENDKPPKLLKLVGEIVKRCRGSPLAATALGSVLRTKTSVEEWEAISSRSSICTD	no	17,16,1,6,4,5,3,12,2,8,7,9,11,11,11,11,11,11,11,11,11,11,11,11,11	yes	3e-50	2.5e-08	NA	0.29	NA	185	379	866	no	no	NA	NA	NA
Hordeum vulgare	HORVU1Hr1G000830.4	CNL	complete	HORVU1Hr1G000830.4:16	HORVU1Hr1G000830.4:1342	QAGNADLAVVPIVGMGGLGKTTLAQLIYNEPKIQKHFQLQLWVCVSDTFDVNSIAKSIVEASPKKNYDTEKPPLDRLQKLLSGKRYLLVLDDVWNREVQKWERLKVCLQHGGMGSAVLTTTRDKQVAEIMGADITYNLNVLKDDFIKEIIVARAFSSENDKPPKLLKLVGEIVKRCRGSPLAATALGSVLRTKTSVEEWEAISSRSSICTD	no	17,16,1,6,4,5,3,12,2,8,7,9,11,11,11,11,11,11,11,11,11,11,11,11,11	yes	2.9e-50	1.8e-09	NA	0.042	NA	185	379	834	no	no	yes	NA	NA
Hordeum vulgare	HORVU1Hr1G000830.5	CNL	complete	HORVU1Hr1G000830.5:16	HORVU1Hr1G000830.5:1374	QAGNADLAVVPIVGMGGLGKTTLAQLIYNEPKIQKHFQLQLWVCVSDTFDVNSIAKSIVEASPKKNYDTEKPPLDRLQKLLSGKRYLLVLDDVWNREVQKWERLKVCLQHGGMGSAVLTTTRDKQVAEIMGADITYNLNVLKDDFIKEIIVARAFSSENDKPPKLLKLVGEIVKRCRGSPLAATALGSVLRTKTSVEEWEAISSRSSICTD	no	17,16,1,6,4,5,3,12,2,8,7,9,11,11,11,11,11,11,11,11,11,11,11,11,11	yes	3e-50	2.5e-08	NA	0.29	NA	185	379	866	no	no	NA	NA	NA
Hordeum vulgare	HORVU1Hr1G000830.6	CNL	complete	HORVU1Hr1G000830.6:16	HORVU1Hr1G000830.6:1374	QAGNADLAVVPIVGMGGLGKTTLAQLIYNEPKIQKHFQLQLWVCVSDTFDVNSIAKSIVEASPKKNYDTEKPPLDRLQKLLSGKRYLLVLDDVWNREVQKWERLKVCLQHGGMGSAVLTTTRDKQVAEIMGADITYNLNVLKDDFIKEIIVARAFSSENDKPPKLLKLVGEIVKRCRGSPLAATALGSVLRTKTSVEEWEAISSRSSICTD	no	17,16,1,6,4,5,3,12,2,8,7,9,11,11,11,11,11,11,11,11,11,11,11,11,11	yes	3e-50	2.5e-08	NA	0.29	NA	185	379	866	no	no	NA	NA	NA
Hordeum vulgare	HORVU1Hr1G000830.7	CNL	complete	HORVU1Hr1G000830.7:24	HORVU1Hr1G000830.7:1382	QAGNADLAVVPIVGMGGLGKTTLAQLIYNEPKIQKHFQLQLWVCVSDTFDVNSIAKSIVEASPKKNYDTEKPPLDRLQKLLSGKRYLLVLDDVWNREVQKWERLKVCLQHGGMGSAVLTTTRDKQVAEIMGADITYNLNVLKDDFIKEIIVARAFSSENDKPPKLLKLVGEIVKRCRGSPLAATALGSVLRTKTSVEEWEAISSRSSICTD	no	17,16,1,6,4,5,3,12,2,8,7,9,11,11,11,11,11,11,11,11,11,11,11,11,11	yes	3e-50	2.5e-08	NA	0.28	NA	193	379	857	no	no	NA	NA	NA
Hordeum vulgare	HORVU1Hr1G000830.8	CNL	partial	HORVU1Hr1G000830.8:62	HORVU1Hr1G000830.8:1226	QAGNADLAVVPIVGMGGLGKTTLAQLIYNEPKIQKHFQLQLWVCVSDTFDVNSIAKSIVEASPKKNYDTEKPPLDRLQKLLSGKRYLLVLDDVWNREVQKWERLKVCLQHGGMGSAVLTTTRDKQVAEIMGADITYNLNVLKDDFIKEIIVARAFSSENDKPPKLLKLVGEIVKRCRGSPLAATALGSVLRTKTSVEEWEAISSRSSICTD	no	1,6,4,5,3,12,2,8,7,9,11,11,11,11,11,11,11,11,11,11,11,11,11	yes	2.7e-50	2.3e-08	NA	0.13	NA	37	379	866	TRUE	no	NA	NA	NA
Hordeum vulgare	HORVU1Hr1G000860.1	CNL	partial	HORVU1Hr1G000860.1:16	HORVU1Hr1G000860.1:483	QASSSELAIVPIVGMGGLGKTTLAQLIYNEPEVQKHFQLLLWVCVSDTFDVNSLAKSIVEASPKKNDGIDKPPLHRLQKLVSGQRYLLVLDDIWNNKELRQWEKLKVCLHGGMGSAVLTTTRDKRVAEIMGADRAAYNLNALEDRFIKKIIEARAFTPDKQKNVELVEIVDEIVKRCRGSPLAATALGSVLRTKTSVEEWKAISSRSSICT	no	17,16,1,6,4,5,3,12,2,8	NA	5.4e-49	NA	NA	NA	NA	NA	NA	NA	NA	NA	NA	NA	NA
Hordeum vulgare	HORVU1Hr1G000860.10	CNL	complete	HORVU1Hr1G000860.10:16	HORVU1Hr1G000860.10:1410	QASSSELAIVPIVGMGGLGKTTLAQLIYNEPEVQKHFQLLLWVCVSDTFDVNSLAKSIVEASPKKNDGIDKPPLHRLQKLVSGQRYLLVLDDIWNNKELRQWEKLKVCLHGGMGSAVLTTTRDKRVAEIMGADRAAYNLNALEDRFIKKIIEARAFTPDKQKNVELVEIVDEIVKRCRGSPLAATALGSVLRTKTSVEEWKAISSRSSICT	no	17,16,1,6,4,5,3,12,2,8,7,9,11,11,11,11,11,11,11,11,11,11,11,11,11,11	yes	3.4e-48	1.9e-08	NA	0.00069	NA	178	374	929	no	no	NA	NA	NA
Hordeum vulgare	HORVU1Hr1G000860.11	CNL	complete	HORVU1Hr1G000860.11:16	HORVU1Hr1G000860.11:1374	QASSSELAIVPIVGMGGLGKTTLAQLIYNEPEVQKHFQLLLWVCVSDTFDVNSLAKSIVEASPKKNDGIDKPPLHRLQKLVSGQRYLLVLDDIWNNKELRQWEKLKVCLHGGMGSAVLTTTRDKRVAEIMGADRAAYNLNALEDRFIKKIIEARAFTPDKQKNVELVEIVDEIVKRCRGSPLAATALGSVLRTKTSVEEWKAISSRSSICT	no	17,16,1,6,4,5,3,12,2,8,7,9,11,11,11,11,11,11,11,11,11,11,11,11,11,11	yes	3.2e-48	1.3e-08	NA	0.0088	NA	142	374	906	no	no	NA	NA	NA
Hordeum vulgare	HORVU1Hr1G000860.12	CNL	complete	HORVU1Hr1G000860.12:16	HORVU1Hr1G000860.12:1303	QASSSELAIVPIVGMGGLGKTTLAQLIYNEPEVQKHFQLLLWVCVSDTFDVNSLAKSIVEASPKKNDGIDKPPLHRLQKLVSGQRYLLVLDDIWNNKELRQWEKLKVCLHGGMGSAVLTTTRDKRVAEIMGADRAAYNLNALEDRFIKKIIEARAFTPDKQKNVELVEIVDEIVKRCRGSPLAATALGSVLRTKTSVEEWKAISSRSSICT	no	17,16,1,6,4,5,3,12,2,8,7,9,11,11,11,11,11,11,11,11,11,11,11,11,11	yes	3e-48	2.9e-08	NA	0.0026	NA	178	374	811	no	no	yes	NA	NA
Hordeum vulgare	HORVU1Hr1G000860.2	CNL	complete	HORVU1Hr1G000860.2:16	HORVU1Hr1G000860.2:1410	QASSSELAIVPIVGMGGLGKTTLAQLIYNEPEVQKHFQLLLWVCVSDTFDVNSLAKSIVEASPKKNDGIDKPPLHRLQKLVSGQRYLLVLDDIWNNKELRQWEKLKVCLHGGMGSAVLTTTRDKRVAEIMGADRAAYNLNALEDRFIKKIIEARAFTPDKQKNVELVEIVDEIVKRCRGSPLAATALGSVLRTKTSVEEWKAISSRSSICT	no	17,16,1,6,4,5,3,12,2,8,7,9,11,11,11,11,11,11,11,11,11,11,11,11,11,11	yes	3.4e-48	1.9e-08	NA	0.00069	NA	178	374	929	no	no	NA	NA	NA
Hordeum vulgare	HORVU1Hr1G000860.3	CNL	complete	HORVU1Hr1G000860.3:16	HORVU1Hr1G000860.3:1410	QASSSELAIVPIVGMGGLGKTTLAQLIYNEPEVQKHFQLLLWVCVSDTFDVNSLAKSIVEASPKKNDGIDKPPLHRLQKLVSGQRYLLVLDDIWNNKELRQWEKLKVCLHGGMGSAVLTTTRDKRVAEIMGADRAAYNLNALEDRFIKKIIEARAFTPDKQKNVELVEIVDEIVKRCRGSPLAATALGSVLRTKTSVEEWKAISSRSSICT	no	17,16,1,6,4,5,3,12,2,8,7,9,11,11,11,11,11,11,11,11,11,11,11,11,11,11	yes	3.4e-48	1.9e-08	NA	0.00069	NA	178	374	929	no	no	NA	NA	NA
Hordeum vulgare	HORVU1Hr1G000860.4	CNL	complete	HORVU1Hr1G000860.4:16	HORVU1Hr1G000860.4:1410	QASSSELAIVPIVGMGGLGKTTLAQLIYNEPEVQKHFQLLLWVCVSDTFDVNSLAKSIVEASPKKNDGIDKPPLHRLQKLVSGQRYLLVLDDIWNNKELRQWEKLKVCLHGGMGSAVLTTTRDKRVAEIMGADRAAYNLNALEDRFIKKIIEARAFTPDKQKNVELVEIVDEIVKRCRGSPLAATALGSVLRTKTSVEEWKAISSRSSICT	no	17,16,1,6,4,5,3,12,2,8,7,9,11,11,11,11,11,11,11,11,11,11,11,11,11,11	yes	3.4e-48	1.9e-08	NA	0.00069	NA	178	374	929	no	no	NA	NA	NA
Hordeum vulgare	HORVU1Hr1G000860.5	CNL	complete	HORVU1Hr1G000860.5:16	HORVU1Hr1G000860.5:1410	QASSSELAIVPIVGMGGLGKTTLAQLIYNEPEVQKHFQLLLWVCVSDTFDVNSLAKSIVEASPKKNDGIDKPPLHRLQKLVSGQRYLLVLDDIWNNKELRQWEKLKVCLHGGMGSAVLTTTRDKRVAEIMGADRAAYNLNALEDRFIKKIIEARAFTPDKQKNVELVEIVDEIVKRCRGSPLAATALGSVLRTKTSVEEWKAISSRSSICT	no	17,16,1,6,4,5,3,12,2,8,7,9,11,11,11,11,11,11,11,11,11,11,11,11,11,11	yes	3.4e-48	1.9e-08	NA	0.00069	NA	178	374	929	no	no	NA	NA	NA
Hordeum vulgare	HORVU1Hr1G000860.6	CNL	complete	HORVU1Hr1G000860.6:16	HORVU1Hr1G000860.6:1410	QASSSELAIVPIVGMGGLGKTTLAQLIYNEPEVQKHFQLLLWVCVSDTFDVNSLAKSIVEASPKKNDGIDKPPLHRLQKLVSGQRYLLVLDDIWNNKELRQWEKLKVCLHGGMGSAVLTTTRDKRVAEIMGADRAAYNLNALEDRFIKKIIEARAFTPDKQKNVELVEIVDEIVKRCRGSPLAATALGSVLRTKTSVEEWKAISSRSSICT	no	17,16,1,6,4,5,3,12,2,8,7,9,11,11,11,11,11,11,11,11,11,11,11,11,11,11	yes	3.4e-48	1.9e-08	NA	0.00069	NA	178	374	929	no	no	NA	NA	NA
Hordeum vulgare	HORVU1Hr1G000860.7	CNL	complete	HORVU1Hr1G000860.7:16	HORVU1Hr1G000860.7:1410	QASSSELAIVPIVGMGGLGKTTLAQLIYNEPEVQKHFQLLLWVCVSDTFDVNSLAKSIVEASPKKNDGIDKPPLHRLQKLVSGQRYLLVLDDIWNNKELRQWEKLKVCLHGGMGSAVLTTTRDKRVAEIMGADRAAYNLNALEDRFIKKIIEARAFTPDKQKNVELVEIVDEIVKRCRGSPLAATALGSVLRTKTSVEEWKAISSRSSICT	no	17,16,1,6,4,5,3,12,2,8,7,9,11,11,11,11,11,11,11,11,11,11,11,11,11,11	yes	3.4e-48	1.9e-08	NA	0.00069	NA	178	374	929	no	no	NA	NA	NA
Hordeum vulgare	HORVU1Hr1G000860.8	CNL	partial	HORVU1Hr1G000860.8:16	HORVU1Hr1G000860.8:483	QASSSELAIVPIVGMGGLGKTTLAQLIYNEPEVQKHFQLLLWVCVSDTFDVNSLAKSIVEASPKKNDGIDKPPLHRLQKLVSGQRYLLVLDDIWNNKELRQWEKLKVCLHGGMGSAVLTTTRDKRVAEIMGADRAAYNLNALEDRFIKKIIEARAFTPDKQKNVELVEIVDEIVKRCRGSPLAATALGSVLRTKTSVEEWKAISSRSSICT	no	17,16,1,6,4,5,3,12,2,8	NA	5.4e-49	NA	NA	NA	NA	NA	NA	NA	NA	NA	NA	NA	NA
Hordeum vulgare	HORVU1Hr1G000860.9	CNL	complete	HORVU1Hr1G000860.9:16	HORVU1Hr1G000860.9:1410	QASSSELAIVPIVGMGGLGKTTLAQLIYNEPEVQKHFQLLLWVCVSDTFDVNSLAKSIVEASPKKNDGIDKPPLHRLQKLVSGQRYLLVLDDIWNNKELRQWEKLKVCLHGGMGSAVLTTTRDKRVAEIMGADRAAYNLNALEDRFIKKIIEARAFTPDKQKNVELVEIVDEIVKRCRGSPLAATALGSVLRTKTSVEEWKAISSRSSICT	no	17,16,1,6,4,5,3,12,2,8,7,9,11,11,11,11,11,11,11,11,11,11,11,11,11,11	yes	3.4e-48	1.7e-08	NA	0.00062	NA	178	374	918	no	no	NA	NA	NA
Hordeum vulgare	HORVU1Hr1G000900.2	CNL	complete	HORVU1Hr1G000900.2:16	HORVU1Hr1G000900.2:1326	QANNAELAVVPIIGMGGLGKTTLAQLIYNDPEIQKHFQLLLWVCVSDTFDVNSLAKSIVEASPSKNVDTDKPPLDRLQKLVSGRRYLLVLDDVWDNKELRKWERLKVCLHGGMGSAVLTTTRDKRVAKIMGADRAAYNLNALEDPFIKKIIEARAFSLDKQKPAELVEIVDEIVKRCCGSPLAATALGSVLRTKTSVEDWKAISSRSSICT	no	17,16,1,6,4,5,3,12,2,8,7,9,11,11,11,11,11,11,11,11,11,11,11,11,11,11	yes	6.9e-47	6.8e-10	NA	NA	NA	178	374	829	no	no	NA	NA	NA
Hordeum vulgare	HORVU1Hr1G000900.3	CNL	complete	HORVU1Hr1G000900.3:16	HORVU1Hr1G000900.3:1326	QANNAELAVVPIIGMGGLGKTTLAQLIYNDPEIQKHFQLLLWVCVSDTFDVNSLAKSIVEASPSKNVDTDKPPLDRLQKLVSGRRYLLVLDDVWDNKELRKWERLKVCLHGGMGSAVLTTTRDKRVAKIMGADRAAYNLNALEDPFIKKIIEARAFSLDKQKPAELVEIVDEIVKRCCGSPLAATALGSVLRTKTSVEDWKAISSRSSICT	no	17,16,1,6,4,5,3,12,2,8,7,9,11,11,11,11,11,11,11,11,11,11,11,11,11,11	yes	6.9e-47	7.1e-10	NA	NA	NA	178	374	837	no	no	NA	NA	NA
Hordeum vulgare	HORVU1Hr1G000900.4	CNL	complete	HORVU1Hr1G000900.4:16	HORVU1Hr1G000900.4:1326	QANNAELAVVPIIGMGGLGKTTLAQLIYNDPEIQKHFQLLLWVCVSDTFDVNSLAKSIVEASPSKNVDTDKPPLDRLQKLVSGRRYLLVLDDVWDNKELRKWERLKVCLHGGMGSAVLTTTRDKRVAKIMGADRAAYNLNALEDPFIKKIIEARAFSLDKQKPAELVEIVDEIVKRCCGSPLAATALGSVLRTKTSVEDWKAISSRSSICT	no	17,16,1,6,4,5,3,12,2,8,7,9,11,11,11,11,11,11,11,11,11,11,11,11,11,11	yes	6.9e-47	6.8e-10	NA	NA	NA	178	374	829	no	no	NA	NA	NA
Hordeum vulgare	HORVU1Hr1G000900.5	CNL	complete	HORVU1Hr1G000900.5:16	HORVU1Hr1G000900.5:1326	QANNAELAVVPIIGMGGLGKTTLAQLIYNDPEIQKHFQLLLWVCVSDTFDVNSLAKSIVEASPSKNVDTDKPPLDRLQKLVSGRRYLLVLDDVWDNKELRKWERLKVCLHGGMGSAVLTTTRDKRVAKIMGADRAAYNLNALEDPFIKKIIEARAFSLDKQKPAELVEIVDEIVKRCCGSPLAATALGSVLRTKTSVEDWKAISSRSSICT	no	17,16,1,6,4,5,3,12,2,8,7,9,11,11,11,11,11,11,11,11,11,11,11,11,11,11	yes	7e-47	7.5e-10	NA	NA	NA	178	374	850	no	no	NA	NA	NA
Hordeum vulgare	HORVU1Hr1G000900.6	CNL	complete	HORVU1Hr1G000900.6:16	HORVU1Hr1G000900.6:1326	QANNAELAVVPIIGMGGLGKTTLAQLIYNDPEIQKHFQLLLWVCVSDTFDVNSLAKSIVEASPSKNVDTDKPPLDRLQKLVSGRRYLLVLDDVWDNKELRKWERLKVCLHGGMGSAVLTTTRDKRVAKIMGADRAAYNLNALEDPFIKKIIEARAFSLDKQKPAELVEIVDEIVKRCCGSPLAATALGSVLRTKTSVEDWKAISSRSSICT	no	17,16,1,6,4,5,3,12,2,8,7,9,11,11,11,11,11,11,11,11,11,11,11,11,11,11	yes	6.9e-47	6.8e-10	NA	NA	NA	178	374	829	no	no	yes	NA	NA
Hordeum vulgare	HORVU1Hr1G000910.2	CNL	partial	HORVU1Hr1G000910.2:99	HORVU1Hr1G000910.2:1313	GASNADLIVVPVVAMGGLGKTTLAQLIYNDPEVQKHFQLLIWVCVSDTFDVNCLAKSIVEACPKKNDDTNKLPLERLQNLVNGQRYILVLDDVWNRDVNKWERLKVCLEHGGTGSAVLTTTRDKRVAEIMGADRLYDLTVLEDIFLKEIIVDRAFSSEKEKSPKLLKLVGEIVKRCRGSPLAATALGSVLRTKTSVEEWKAISSRSSICTE	no	1,6,4,5,3,12,2,8,7,9,11,11,11,11,11,11,11,11,11,11,11,11,11,11	yes	8.8e-47	4.7e-09	NA	9.3e-05	NA	74	379	916	no	no	NA	NA	NA
Hordeum vulgare	HORVU1Hr1G000910.3	CNL	partial	HORVU1Hr1G000910.3:75	HORVU1Hr1G000910.3:1289	GASNADLIVVPVVAMGGLGKTTLAQLIYNDPEVQKHFQLLIWVCVSDTFDVNCLAKSIVEACPKKNDDTNKLPLERLQNLVNGQRYILVLDDVWNRDVNKWERLKVCLEHGGTGSAVLTTTRDKRVAEIMGADRLYDLTVLEDIFLKEIIVDRAFSSEKEKSPKLLKLVGEIVKRCRGSPLAATALGSVLRTKTSVEEWKAISSRSSICTE	no	1,6,4,5,3,12,2,8,7,9,11,11,11,11,11,11,11,11,11,11,11,11,11,11	yes	8.5e-47	4.6e-09	NA	0.00091	NA	50	379	882	TRUE	no	NA	NA	NA
Hordeum vulgare	HORVU1Hr1G000910.8	CNL	partial	HORVU1Hr1G000910.8:78	HORVU1Hr1G000910.8:1193	GASNADLIVVPVVAMGGLGKTTLAQLIYNDPEVQKHFQLLIWVCVSDTFDVNCLAKSIVEACPKKNDDTNKLPLERLQNLVNGQRYILVLDDVWNRDVNKWERLKVCLEHGGTGSAVLTTTRDKRVAEIMGADRLYDLTVLEDIFLKEIIVDRAFSSEKEKSPKLLKLVGEIVKRCRGSPLAATALGSVLRTKTSVEEWKAISSRSSICTE	no	1,6,4,5,3,12,2,8,7,9,11,11,11,11,11,11,11,11,11,11,11,11,11	yes	7.9e-47	7.1e-09	NA	0.01	NA	53	379	820	TRUE	no	NA	NA	NA
Hordeum vulgare	HORVU1Hr1G000910.9	CNL	partial	HORVU1Hr1G000910.9:115	HORVU1Hr1G000910.9:1329	GASNADLIVVPVVAMGGLGKTTLAQLIYNDPEVQKHFQLLIWVCVSDTFDVNCLAKSIVEACPKKNDDTNKLPLERLQNLVNGQRYILVLDDVWNRDVNKWERLKVCLEHGGTGSAVLTTTRDKRVAEIMGADRLYDLTVLEDIFLKEIIVDRAFSSEKEKSPKLLKLVGEIVKRCRGSPLAATALGSVLRTKTSVEEWKAISSRSSICTE	no	1,6,4,5,3,12,2,8,7,9,11,11,11,11,11,11,11,11,11,11,11,11,11,11	yes	9.2e-47	4.9e-09	NA	0.0001	NA	90	379	913	no	no	yes	NA	NA
Hordeum vulgare	HORVU1Hr1G001460.1	CNL	partial	HORVU1Hr1G001460.1:22	HORVU1Hr1G001460.1:1165	NA	no	6,4,5,3,12,2,8,7,9,11,11,11,11,11,11,11,11,11,11,11,11,11	yes	5.5e-44	8.6e-08	NA	NA	NA	0	356	856	TRUE	no	NA	NA	NA
Hordeum vulgare	HORVU1Hr1G001460.2	CNL	partial	HORVU1Hr1G001460.2:22	HORVU1Hr1G001460.2:1165	NA	no	6,4,5,3,12,2,8,7,9,11,11,11,11,11,11,11,11,11,11,11,11,11	yes	5.5e-44	8.6e-08	NA	NA	NA	0	356	856	TRUE	no	NA	NA	NA
Hordeum vulgare	HORVU1Hr1G001460.3	CNL	partial	HORVU1Hr1G001460.3:22	HORVU1Hr1G001460.3:1165	NA	no	6,4,5,3,12,2,8,7,9,11,11,11,11,11,11,11,11,11,11,11,11,11	yes	5.5e-44	8.6e-08	NA	NA	NA	0	356	856	TRUE	no	NA	NA	NA
Hordeum vulgare	HORVU1Hr1G001460.4	CNL	partial	HORVU1Hr1G001460.4:22	HORVU1Hr1G001460.4:1165	NA	no	6,4,5,3,12,2,8,7,9,11,11,11,11,11,11,11,11,11,11,11,11,11	yes	5.6e-44	8.7e-08	NA	NA	NA	0	356	857	TRUE	no	NA	NA	NA
Hordeum vulgare	HORVU1Hr1G001460.5	CNL	partial	HORVU1Hr1G001460.5:22	HORVU1Hr1G001460.5:1165	NA	no	6,4,5,3,12,2,8,7,9,11,11,11,11,11,11,11,11,11,11,11,11,11	yes	5.6e-44	8.7e-08	NA	NA	NA	0	356	857	TRUE	no	NA	NA	NA
Hordeum vulgare	HORVU1Hr1G001460.6	CNL	partial	HORVU1Hr1G001460.6:22	HORVU1Hr1G001460.6:1165	NA	no	6,4,5,3,12,2,8,7,9,11,11,11,11,11,11,11,11,11,11,11,11,11	yes	5.5e-44	8.6e-08	NA	NA	NA	0	356	856	TRUE	no	NA	NA	NA
Hordeum vulgare	HORVU1Hr1G001460.7	CNL	complete	HORVU1Hr1G001460.7:3	HORVU1Hr1G001460.7:1233	QASNADLTVVPIVGMGGMGKTTLAQIIYNEPEIQKHFQLQLWVCVSDSFDVNSIAKSIVEASPKKNYDTDKPSLDRLQKLVSGKRYLLVLDDVWNREVQKWERLKVCLQHGGLGSAVLTTTRDKQVAEIMGAGRTYNLNVLKDNFIKEIIVARAFSSKNEKPPKLLKLVGQIVKRCRGSPLAATALGSVLRTKTSVEEWKAISSRSSICTD	no	16,1,6,4,5,3,12,2,8,7,9,11,11,11,11,11,11,11,11,11,11,11,11,11	yes	7.6e-49	1.5e-07	NA	NA	NA	40	384	856	TRUE	no	NA	NA	NA
Hordeum vulgare	HORVU1Hr1G001460.8	CNL	partial	HORVU1Hr1G001460.8:22	HORVU1Hr1G001460.8:468	NA	no	6,4,5,3,12,2,8,7,9,11,11	NA	1.6e-44	2.6e-06	NA	0.66	NA	NA	NA	NA	NA	NA	NA	NA	NA
Hordeum vulgare	HORVU1Hr1G001490.1	CNL	complete	HORVU1Hr1G001490.1:20	HORVU1Hr1G001490.1:864	GLEQSSSNVTVVWGMPGVGKTTLVDHVYNTMKENFDVAAWVTVSEGYRIEDLLKKIVAQFGITVNVANNEMRGLSKYIHNYLQGKRYILVLDDVWAERLWSEIRDIFPTSNCTSRVIITSRKQAVLATRESASAIHLEPLEEHYSWLLFCKGAFGNTDDKECPLELHELAWKFIAKCQGLPIAIACISRLLSCKPKNSVEWQDVYQCLDSQ	no	17,16,14,1,6,4,5,10,3,2,8,7,11,9,9,9,11,11	yes	1.4e-50	9.7e-07	NA	NA	NA	171	377	376	no	no	NA	NA	NA
Hordeum vulgare	HORVU1Hr1G001490.2	CNL	complete	HORVU1Hr1G001490.2:20	HORVU1Hr1G001490.2:864	GLEQSSSNVTVVWGMPGVGKTTLVDHVYNTMKENFDVAAWVTVSEGYRIEDLLKKIVAQFGITVNVANNEMRGLSKYIHNYLQGKRYILVLDDVWAERLWSEIRDIFPTSNCTSRVIITSRKQAVLATRESASAIHLEPLEEHYSWLLFCKGAFGNTDDKECPLELHELAWKFIAKCQGLPIAIACISRLLSCKPKNSVEWQDVYQCLDSQ	no	17,16,14,1,6,4,5,10,3,2,8,7,11,9,9,9,11,11	yes	1.4e-50	9.7e-07	NA	NA	NA	171	377	376	no	no	yes	NA	NA
Hordeum vulgare	HORVU1Hr1G001490.3	NA	partial	HORVU1Hr1G001490.3:3	HORVU1Hr1G001490.3:247	NA	no	9,11,11	NA	NA	1.9e-05	NA	NA	NA	NA	NA	NA	NA	NA	NA	NA	NA
Hordeum vulgare	HORVU1Hr1G001630.1	CNL	complete	HORVU1Hr1G001630.1:20	HORVU1Hr1G001630.1:863	GMEQRNNKVIMVWGMPGVGKTTLVDHVYNIVKEDFDVAAWVTVSENYRIEDLLKKIAAQFSVIIEVTNIQIRGLAKSIHNYLESKNYILVLDDVWDERLWSEIRDVFSTSNCTSRVVMTSRKQTVLATREFAYRIHLEPLQAHHSWVLFCKGAFWNVDEQKCPLELHELAWKFIAKSQGLPIAIACIGRLLSCKPQNSAEWEDVYRCLDSQ	no	17,16,14,1,6,4,5,10,3,2,8,7,9,9,9,11	yes	2.3e-49	1.1e-08	NA	NA	NA	171	376	376	no	no	yes	NA	NA
Hordeum vulgare	HORVU1Hr1G001810.1	CNL	partial	HORVU1Hr1G001810.1:1	HORVU1Hr1G001810.1:388	MVWGMLGVGKTTLVAHVYSAMKLDFDAAAWVTISESYCIEDLLKKIVVEFGIAVDVANIDMRGLAESIHDYLQGKKYILVLDDVWAARVWLEIRNVFPTSNCTGRFVITSRKHEVSLLATRESAIHLEPLQAHHSSVLFCKGAFWNNDDKQCPLELQKLARKFVAKCQGLPIAIACIGRLLLCKPPTFAEWENLYTGLDSQ	no	1,6,4,5,10,3,12,2,8,7,9	NA	8.4e-45	0.063	NA	NA	NA	NA	NA	NA	NA	NA	NA	NA	NA
Hordeum vulgare	HORVU1Hr1G001810.2	CNL	partial	HORVU1Hr1G001810.2:1	HORVU1Hr1G001810.2:658	MVWGMLGVGKTTLVAHVYSAMKLDFDAAAWVTISESYCIEDLLKKIVVEFGIAVDVANIDMRGLAESIHDYLQGKKYILVLDDVWAARVWLEIRNVFPTSNCTGRFVITSRKHEVSLLATRESAIHLEPLQAHHSSVLFCKGAFWNNDDKQCPLELQKLARKFVAKCQGLPIAIACIGRLLLCKPPTFAEWENLYTGLDSQ	no	1,6,4,5,10,3,12,2,8,7,9,9,9,11,11	NA	2.5e-44	4.4e-08	NA	NA	NA	NA	NA	NA	NA	NA	NA	NA	NA
Hordeum vulgare	HORVU1Hr1G001810.3	CNL	partial	HORVU1Hr1G001810.3:1	HORVU1Hr1G001810.3:434	MVWGMLGVGKTTLVAHVYSAMKLDFDAAAWVTISESYCIEDLLKKIVVEFGIAVDVANIDMRGLAESIHDYLQGKKYILVLDDVWAARVWLEIRNVFPTSNCTGRFVITSRKHEVSLLATRESAIHLEPLQAHHSSVLFCKGAFWNNDDKQCPLELQKLARKFVAKCQGLPIAIACIGRLLLCKPPTFAEWENLYTGLDSQ	no	1,6,4,5,10,3,12,2,8,7,9,9,9	NA	1.1e-44	3.3e-05	NA	NA	NA	NA	NA	NA	NA	NA	NA	NA	NA
Hordeum vulgare	HORVU1Hr1G001810.4	CNL	partial	HORVU1Hr1G001810.4:1	HORVU1Hr1G001810.4:658	MVWGMLGVGKTTLVAHVYSAMKLDFDAAAWVTISESYCIEDLLKKIVVEFGIAVDVANIDMRGLAESIHDYLQGKKYILVLDDVWAARVWLEIRNVFPTSNCTGRFVITSRKHEVSLLATRESAIHLEPLQAHHSSVLFCKGAFWNNDDKQCPLELQKLARKFVAKCQGLPIAIACIGRLLLCKPPTFAEWENLYTGLDSQ	no	1,6,4,5,10,3,12,2,8,7,9,9,9,11,11	NA	2.5e-44	4.4e-08	NA	NA	NA	NA	NA	NA	NA	NA	NA	NA	NA
Hordeum vulgare	HORVU1Hr1G001810.5	CNL	partial	HORVU1Hr1G001810.5:1	HORVU1Hr1G001810.5:434	MVWGMLGVGKTTLVAHVYSAMKLDFDAAAWVTISESYCIEDLLKKIVVEFGIAVDVANIDMRGLAESIHDYLQGKKYILVLDDVWAARVWLEIRNVFPTSNCTGRFVITSRKHEVSLLATRESAIHLEPLQAHHSSVLFCKGAFWNNDDKQCPLELQKLARKFVAKCQGLPIAIACIGRLLLCKPPTFAEWENLYTGLDSQ	no	1,6,4,5,10,3,12,2,8,7,9,9,9	NA	1.1e-44	3.3e-05	NA	NA	NA	NA	NA	NA	NA	NA	NA	NA	NA
Hordeum vulgare	HORVU1Hr1G001810.6	CNL	partial	HORVU1Hr1G001810.6:1	HORVU1Hr1G001810.6:658	MVWGMLGVGKTTLVAHVYSAMKLDFDAAAWVTISESYCIEDLLKKIVVEFGIAVDVANIDMRGLAESIHDYLQGKKYILVLDDVWAARVWLEIRNVFPTSNCTGRFVITSRKHEVSLLATRESAIHLEPLQAHHSSVLFCKGAFWNNDDKQCPLELQKLARKFVAKCQGLPIAIACIGRLLLCKPPTFAEWENLYTGLDSQ	no	1,6,4,5,10,3,12,2,8,7,9,9,9,11,11	NA	2.5e-44	4.4e-08	NA	NA	NA	NA	NA	NA	NA	NA	NA	NA	NA
Hordeum vulgare	HORVU1Hr1G001810.7	CNL	partial	HORVU1Hr1G001810.7:1	HORVU1Hr1G001810.7:658	MVWGMLGVGKTTLVAHVYSAMKLDFDAAAWVTISESYCIEDLLKKIVVEFGIAVDVANIDMRGLAESIHDYLQGKKYILVLDDVWAARVWLEIRNVFPTSNCTGRFVITSRKHEVSLLATRESAIHLEPLQAHHSSVLFCKGAFWNNDDKQCPLELQKLARKFVAKCQGLPIAIACIGRLLLCKPPTFAEWENLYTGLDSQ	no	1,6,4,5,10,3,12,2,8,7,9,9,9,11,11	NA	2.5e-44	4.4e-08	NA	NA	NA	NA	NA	NA	NA	NA	NA	NA	NA
Hordeum vulgare	HORVU1Hr1G001810.8	CNL	partial	HORVU1Hr1G001810.8:1	HORVU1Hr1G001810.8:658	MVWGMLGVGKTTLVAHVYSAMKLDFDAAAWVTISESYCIEDLLKKIVVEFGIAVDVANIDMRGLAESIHDYLQGKKYILVLDDVWAARVWLEIRNVFPTSNCTGRFVITSRKHEVSLLATRESAIHLEPLQAHHSSVLFCKGAFWNNDDKQCPLELQKLARKFVAKCQGLPIAIACIGRLLLCKPPTFAEWENLYTGLDSQ	no	1,6,4,5,10,3,12,2,8,7,9,9,9,11,11	NA	2.5e-44	4.4e-08	NA	NA	NA	NA	NA	NA	NA	NA	NA	NA	NA
Hordeum vulgare	HORVU1Hr1G001810.9	CNL	partial	HORVU1Hr1G001810.9:1	HORVU1Hr1G001810.9:658	MVWGMLGVGKTTLVAHVYSAMKLDFDAAAWVTISESYCIEDLLKKIVVEFGIAVDVANIDMRGLAESIHDYLQGKKYILVLDDVWAARVWLEIRNVFPTSNCTGRFVITSRKHEVSLLATRESAIHLEPLQAHHSSVLFCKGAFWNNDDKQCPLELQKLARKFVAKCQGLPIAIACIGRLLLCKPPTFAEWENLYTGLDSQ	no	1,6,4,5,10,3,12,2,8,7,9,9,9,11,11	NA	2.5e-44	4.4e-08	NA	NA	NA	NA	NA	NA	NA	NA	NA	NA	NA
Hordeum vulgare	HORVU1Hr1G002440.1	CNL	partial	HORVU1Hr1G002440.1:83	HORVU1Hr1G002440.1:1186	QANNADIAVVPIVGMGGLGKTTLTQLIYNEPEIQKHFQLLLWVCVSDTFDVNSLAKSIVEASPNKDDDTNKPPLDRLQKLVSGQRYLLVLDDVWDNRELRRWERLKAYLQHGGMGSVVLTTTRDKRVAEIMGAEAYNLSVLEDSFIKEIIEARAFSSEKGKPVELVEMVDEIVKRCSGSPLAATALGSVLYTKTSVNEWKAVSSRSSICTE	no	1,6,4,5,3,12,2,8,7,9,11,11,11,11,11,11,11,11,11,11,11,11,11,11,11	yes	4.8e-48	9.3e-07	NA	NA	NA	58	370	846	TRUE	no	NA	NA	NA
Hordeum vulgare	HORVU1Hr1G002440.2	CNL	complete	HORVU1Hr1G002440.2:52	HORVU1Hr1G002440.2:1366	QANNADIAVVPIVGMGGLGKTTLTQLIYNEPEIQKHFQLLLWVCVSDTFDVNSLAKSIVEASPNKDDDTNKPPLDRLQKLVSGQRYLLVLDDVWDNRELRRWERLKAYLQHGGMGSVVLTTTRDKRVAEIMGAEAYNLSVLEDSFIKEIIEARAFSSEKGKPVELVEMVDEIVKRCSGSPLAATALGSVLYTKTSVNEWKAVSSRSSICTE	no	17,16,1,6,4,5,3,12,2,8,7,9,11,11,11,11,11,11,11,11,11,11,11,11,11,11,11	yes	5.8e-48	2.4e-06	NA	NA	NA	214	379	861	no	no	yes	NA	NA
Hordeum vulgare	HORVU1Hr1G002540.1	CNL	partial	HORVU1Hr1G002540.1:16	HORVU1Hr1G002540.1:293	QANNADIAVVPIVGMGGLGKTTLTQLIYNEPEIQKHFQLLLWVCVSDTFNVNSLAKSIVEASPNKDDDTNKPPLDRLQKLVSGQRYLLVLDDVWDNRELRRWERLKAYLQHGGSGQCS	no	17,16,1,6,4	NA	4.4e-27	NA	NA	NA	NA	NA	NA	NA	NA	NA	NA	NA	NA
Hordeum vulgare	HORVU1Hr1G002620.1	NA	partial	HORVU1Hr1G002620.1:19	HORVU1Hr1G002620.1:420	NA	no	8,7,9,9,9,11,11	NA	NA	6e-08	NA	NA	NA	NA	NA	NA	NA	NA	NA	NA	NA
Hordeum vulgare	HORVU1Hr1G002620.2	NA	partial	HORVU1Hr1G002620.2:19	HORVU1Hr1G002620.2:396	NA	no	8,7,9,9,9,11	NA	NA	3.3e-07	NA	NA	NA	NA	NA	NA	NA	NA	NA	NA	NA
Hordeum vulgare	HORVU1Hr1G002640.1	CNL	complete	HORVU1Hr1G002640.1:81	HORVU1Hr1G002640.1:879	PMDLLHYVVIVLYGMGGLGKTVLAANVYRKEREKFDCHAWVSISQTYSTKDVLKCLITELYRDRQDIPDNINNMGINDLQHAVSAFLNDKKYLIILDDVWSPEAFGDLFGALVHNNMQSRLVITTRQGKVCALASPERILALTALPEDKALDLFCKKAFPRHTNHKCPAEFNPLSEEIVKKCRGLPLALVSVGSLLRVREKSVEEWRKIND	no	16,1,6,4,5,10,3,12,2,8,7,9,9,11,11	yes	1.1e-53	2.5e-05	NA	NA	NA	183	378	374	no	no	NA	NA	NA
Hordeum vulgare	HORVU1Hr1G002640.2	CNL	complete	HORVU1Hr1G002640.2:81	HORVU1Hr1G002640.2:879	PMDLLHYVVIVLYGMGGLGKTVLAANVYRKEREKFDCHAWVSISQTYSTKDVLKCLITELYRDRQDIPDNINNMGINDLQHAVSAFLNDKKYLIILDDVWSPEAFGDLFGALVHNNMQSRLVITTRQGKVCALASPERILALTALPEDKALDLFCKKAFPRHTNHKCPAEFNPLSEEIVKKCRGLPLALVSVGSLLRVREKSVEEWRKIND	no	16,1,6,4,5,10,3,12,2,8,7,9,9,11,11	yes	1.1e-53	2.5e-05	NA	NA	NA	183	378	374	no	no	yes	NA	NA
Hordeum vulgare	HORVU1Hr1G002640.3	CNL	complete	HORVU1Hr1G002640.3:81	HORVU1Hr1G002640.3:879	PMDLLHYVVIVLYGMGGLGKTVLAANVYRKEREKFDCHAWVSISQTYSTKDVLKCLITELYRDRQDIPDNINNMGINDLQHAVSAFLNDKKYLIILDDVWSPEAFGDLFGALVHNNMQSRLVITTRQGKVCALASPERILALTALPEDKALDLFCKKAFPRHTNHKCPAEFNPLSEEIVKKCRGLPLALVSVGSLLRVREKSVEEWRKIND	no	16,1,6,4,5,10,3,12,2,8,7,9,9,11,11	yes	1.1e-53	2.5e-05	NA	NA	NA	183	378	374	no	no	NA	NA	NA
Hordeum vulgare	HORVU1Hr1G002680.1	CNL	partial	HORVU1Hr1G002680.1:27	HORVU1Hr1G002680.1:306	NA	no	10,3,12,2,8,7,11,9	NA	1.1e-11	NA	NA	0.11	NA	NA	NA	NA	NA	NA	NA	NA	NA
Hordeum vulgare	HORVU1Hr1G002680.2	CNL	partial	HORVU1Hr1G002680.2:13	HORVU1Hr1G002680.2:348	NA	no	4,5,10,3,12,2,8,7,11,9	NA	1.9e-20	NA	NA	0.15	NA	NA	NA	NA	NA	NA	NA	NA	NA
Hordeum vulgare	HORVU1Hr1G002680.3	CNL	partial	HORVU1Hr1G002680.3:27	HORVU1Hr1G002680.3:306	NA	no	10,3,12,2,8,7,11,9	NA	1.1e-11	NA	NA	0.11	NA	NA	NA	NA	NA	NA	NA	NA	NA
Hordeum vulgare	HORVU1Hr1G002690.1	CNL	partial	HORVU1Hr1G002690.1:15	HORVU1Hr1G002690.1:251	GELATQLTIVSIVGTGGLGKTTLARQVYNKLGANFDCRAFVSISRSPNMTKILSSILYQLRNQDQDHAGPGDPQFIIDHIREFLKDKRHPAKINE	no	17,16,14,1,6	NA	8.1e-16	NA	NA	NA	NA	NA	NA	NA	NA	NA	NA	NA	NA
Hordeum vulgare	HORVU1Hr1G002690.2	CNL	partial	HORVU1Hr1G002690.2:15	HORVU1Hr1G002690.2:250	GELATQLTIVSIVGTGGLGKTTLARQVYNKLGANFDCRAFVSISRSPNMTKILSSILYQLRNQDQDHAGPGDPQFIIDHIREFLKDKRHVNTTTSSSILFQA	no	17,16,14,1,6	NA	4e-16	NA	NA	NA	NA	NA	NA	NA	NA	NA	NA	NA	NA
Hordeum vulgare	HORVU1Hr1G002690.3	CNL	partial	HORVU1Hr1G002690.3:15	HORVU1Hr1G002690.3:250	GELATQLTIVSIVGTGGLGKTTLARQVYNKLGANFDCRAFVSISRSPNMTKILSSILYQLRNQDQDHAGPGDPQFIIDHIREFLKDKRHVNTTTSSSILFQA	no	17,16,14,1,6	NA	4e-16	NA	NA	NA	NA	NA	NA	NA	NA	NA	NA	NA	NA
Hordeum vulgare	HORVU1Hr1G002690.4	CNL	partial	HORVU1Hr1G002690.4:15	HORVU1Hr1G002690.4:250	GELATQLTIVSIVGTGGLGKTTLARQVYNKLGANFDCRAFVSISRSPNMTKILSSILYQLRNQDQDHAGPGDPQFIIDHIREFLKDKRHPASKD	no	17,16,14,1,6	NA	8e-16	NA	NA	NA	NA	NA	NA	NA	NA	NA	NA	NA	NA
Hordeum vulgare	HORVU1Hr1G002690.5	CNL	partial	HORVU1Hr1G002690.5:15	HORVU1Hr1G002690.5:251	GELATQLTIVSIVGTGGLGKTTLARQVYNKLGANFDCRAFVSISRSPNMTKILSSILYQLRNQDQDHAGPGDPQFIIDHIREFLKDKRHVNTTTSSSILFQA	no	17,16,14,1,6	NA	4e-16	NA	NA	NA	NA	NA	NA	NA	NA	NA	NA	NA	NA
Hordeum vulgare	HORVU1Hr1G002730.1	CNL	partial	HORVU1Hr1G002730.1:41	HORVU1Hr1G002730.1:499	NA	no	12,2,8,7,9,9,11,11	NA	0.024	0.0002	NA	NA	NA	NA	NA	NA	NA	NA	NA	NA	NA
Hordeum vulgare	HORVU1Hr1G002730.2	CNL	partial	HORVU1Hr1G002730.2:41	HORVU1Hr1G002730.2:499	NA	no	12,2,8,7,9,9,11,11	NA	0.024	0.0002	NA	NA	NA	NA	NA	NA	NA	NA	NA	NA	NA
Hordeum vulgare	HORVU1Hr1G002730.3	CNL	partial	HORVU1Hr1G002730.3:41	HORVU1Hr1G002730.3:499	NA	no	12,2,8,7,9,9,11,11	NA	0.024	0.0002	NA	NA	NA	NA	NA	NA	NA	NA	NA	NA	NA
Hordeum vulgare	HORVU1Hr1G002850.1	CNL	partial	HORVU1Hr1G002850.1:15	HORVU1Hr1G002850.1:568	DQPTQELQVITVWGMGGLGKTTLVKDIYGNQELSAMFEKRAWVTVMRPFNLEGLLRSLIMQLDRESSETKTVVGLMGSTRNTLLLMPLLSLIEEMGRLTEKKRCLIVLDDVSSSAEWNMITPNFHGMEYTSRIMVTTREENLAKLCSRRQENIYMLKDLDHKDARDLFTKK	no	17,16,6,4,5,1,6,4,5	NA	1.7e-45	NA	NA	NA	NA	NA	NA	NA	NA	NA	NA	NA	NA
Hordeum vulgare	HORVU1Hr1G002850.10	CNL	partial	HORVU1Hr1G002850.10:37	HORVU1Hr1G002850.10:615	DQPTQELQVITVWGMGGLGKTTLVKDIYGNQELSAMFEKRAWVTVMRPFNLEGLLRSLIMQLDRESSETKTVVGLMGSTRNTLLLMPLLSLIEEMGRLTEKKRCLIVLDDVSSSAEWNMITPNFHGMEYTSRIMVTTREENLAKLCSRRQENIYMLKDLDHKDARDLFTKKVLNYTVLSCFFA	no	17,16,6,4,5,1,6,4,5,10	NA	4.4e-47	NA	NA	NA	NA	NA	NA	NA	NA	NA	NA	NA	NA
Hordeum vulgare	HORVU1Hr1G002850.11	CNL	partial	HORVU1Hr1G002850.11:35	HORVU1Hr1G002850.11:884	DQPTQELQVITVWGMGGLGKTTLVKDIYGNQELSAMFEKRAWVTVMRPFNLEGLLRSLIMQLDRESSETKTVVGLMGSTRNTLLLMPLLSLIEEMGRLTEKKRCLIVLDDVSSSAEWNMITPNFHGMEYTSRIMVTTREENLAKLCSRRQENIYMLKDLDHKDARDLFTKKVFKETTDLDLQYPDLVEHAELILRRCGRLPLAIATIGGFL	no	17,16,6,4,5,1,6,4,5,10,3,12,2,8,7,9	yes	1.2e-58	0.00078	NA	NA	NA	426	397	389	no	no	NA	NA	NA
Hordeum vulgare	HORVU1Hr1G002850.12	CNL	partial	HORVU1Hr1G002850.12:32	HORVU1Hr1G002850.12:585	DQPTQELQVITVWGMGGLGKTTLVKDIYGNQELSAMFEKRAWVTVMRPFNLEGLLRSLIMQLDRESSETKTVVGLMGSTRNTLLLMPLLSLIEEMGRLTEKKRCLIVLDDVSSSAEWNMITPNFHGMEYTSRIMVTTREENLAKLCSRRQENIYMLKDLDHKDARDLFTKK	no	17,16,6,4,5,1,6,4,5	NA	1.8e-45	NA	NA	NA	NA	NA	NA	NA	NA	NA	NA	NA	NA
Hordeum vulgare	HORVU1Hr1G002850.13	CNL	partial	HORVU1Hr1G002850.13:15	HORVU1Hr1G002850.13:316	NA	no	17,16,6,4,5	NA	3.8e-17	NA	NA	NA	NA	NA	NA	NA	NA	NA	NA	NA	NA
Hordeum vulgare	HORVU1Hr1G002850.14	CNL	partial	HORVU1Hr1G002850.14:8	HORVU1Hr1G002850.14:243	NA	no	12,2,8,7,11,11,9	NA	NA	1.7e-05	NA	NA	NA	NA	NA	NA	NA	NA	NA	NA	NA
Hordeum vulgare	HORVU1Hr1G002850.15	CNL	partial	HORVU1Hr1G002850.15:48	HORVU1Hr1G002850.15:327	NA	no	3,12,2,8,7,11,11,9	NA	3.2e-06	3.5e-05	NA	0.81	NA	NA	NA	NA	NA	NA	NA	NA	NA
Hordeum vulgare	HORVU1Hr1G002850.2	CNL	partial	HORVU1Hr1G002850.2:15	HORVU1Hr1G002850.2:329	NA	no	17,16,4,5	NA	7.6e-10	NA	NA	NA	NA	NA	NA	NA	NA	NA	NA	NA	NA
Hordeum vulgare	HORVU1Hr1G002850.3	CNL	partial	HORVU1Hr1G002850.3:15	HORVU1Hr1G002850.3:567	NA	no	17,16,4,5,4,5,10,3,12	NA	1.5e-40	NA	NA	NA	NA	NA	NA	NA	NA	NA	NA	NA	NA
Hordeum vulgare	HORVU1Hr1G002850.5	CNL	complete	HORVU1Hr1G002850.5:54	HORVU1Hr1G002850.5:875	DQPTQELQVITVWGMGGLGKTTLVKDIYGNQELSAMFEKRAWVTVMRPFNLEGLLRSLIMQLDRESSETKTVVGLMGSTRNTLLLMPLLSLIEEMGRLTEKKRCLIVLDDVSSSAEWNMITPNFHGMEYTSRIMVTTREENLAKLCSRRQENIYMLKDLDHKDARDLFTKKVFKETTDLDLQYPDLVEHAELILRRCGRLPLAIATIGGFL	no	16,6,4,5,1,6,4,5,10,3,12,2,8,7,11,11,9	yes	1.3e-58	0.00017	NA	NA	NA	386	397	420	no	no	NA	NA	NA
Hordeum vulgare	HORVU1Hr1G002850.6	CNL	complete	HORVU1Hr1G002850.6:61	HORVU1Hr1G002850.6:941	DQPTQELQVITVWGMGGLGKTTLVKDIYGNQELSAMFEKRAWVTVMRPFNLEGLLRSLIMQLDRESSETKTVVGLMGSTRNTLLLMPLLSLIEEMGRLTEKKRCLIVLDDVSSSAEWNMITPNFHGMEYTSRIMVTTREENLAKLCSRRQENIYMLKDLDHKDARDLFTKKVFKETTDLDLQYPDLVEHAELILRRCGRLPLAIATIGGFL	no	17,16,6,4,5,1,6,4,5,10,3,12,2,8,7,11,11,9	yes	1.4e-58	0.00016	NA	NA	NA	452	397	420	no	no	NA	NA	NA
Hordeum vulgare	HORVU1Hr1G002850.7	CNL	partial	HORVU1Hr1G002850.7:8	HORVU1Hr1G002850.7:243	NA	no	12,2,8,7,11,11,9	NA	NA	1.7e-05	NA	NA	NA	NA	NA	NA	NA	NA	NA	NA	NA
Hordeum vulgare	HORVU1Hr1G002850.8	CNL	partial	HORVU1Hr1G002850.8:103	HORVU1Hr1G002850.8:568	DQPTQELQVITVWGMGGLGKTTLVKDIYGNQELSAMFEKRAWVTVMRPFNLEGLLRSLIMQLDRESSETKTVVGLMGSTRNTLLLMPLLSLIEEMGRLTEKKRCLIVLDDVSSSAEWNMITPNFHGMEYTSRIMVTTREENLAKLCSRRQENIYMLKDLDHKDARDLFTKKVFKETTDLDLQYPDLVEHAELILRRCGRLPLAIATIGGFL	no	1,6,4,5,10,3,12,2,8,7,11,11,9	yes	8.7e-41	2.9e-05	NA	NA	NA	79	397	420	no	no	yes	NA	NA
Hordeum vulgare	HORVU1Hr1G002850.9	CNL	complete	HORVU1Hr1G002850.9:37	HORVU1Hr1G002850.9:917	DQPTQELQVITVWGMGGLGKTTLVKDIYGNQELSAMFEKRAWVTVMRPFNLEGLLRSLIMQLDRESSETKTVVGLMGSTRNTLLLMPLLSLIEEMGRLTEKKRCLIVLDDVSSSAEWNMITPNFHGMEYTSRIMVTTREENLAKLCSRRQENIYMLKDLDHKDARDLFTKKVFKETTDLDLQYPDLVEHAELILRRCGRLPLAIATIGGFL	no	17,16,6,4,5,1,6,4,5,10,3,12,2,8,7,11,11,9	yes	1.3e-58	0.00015	NA	NA	NA	428	397	420	no	no	NA	NA	NA
Hordeum vulgare	HORVU1Hr1G002990.1	NA	partial	HORVU1Hr1G002990.1:407	HORVU1Hr1G002990.1:906	NA	no	9,11,9,11,9,11,11,9,11,11,11,11,11	yes	NA	1.5e-20	0.0053	2e-05	NA	NA	NA	NA	NA	NA	NA	NA	NA
Hordeum vulgare	HORVU1Hr1G002990.2	NA	partial	HORVU1Hr1G002990.2:404	HORVU1Hr1G002990.2:980	NA	no	9,11,9,11,9,11,11,9,11,11,11,11,11,11	yes	NA	7.6e-19	0.0052	0.0025	NA	NA	NA	NA	NA	NA	NA	NA	NA
Hordeum vulgare	HORVU1Hr1G002990.3	NA	partial	HORVU1Hr1G002990.3:401	HORVU1Hr1G002990.3:900	NA	no	9,11,9,11,9,11,11,9,11,11,11,11,11	yes	NA	1.4e-20	0.0056	1.9e-05	NA	NA	NA	NA	NA	NA	NA	NA	NA
Hordeum vulgare	HORVU1Hr1G002990.4	NA	partial	HORVU1Hr1G002990.4:401	HORVU1Hr1G002990.4:847	NA	no	9,11,9,11,9,11,11,9,11,11	yes	NA	5.6e-19	0.005	4.3e-05	NA	NA	NA	NA	NA	NA	NA	NA	NA
Hordeum vulgare	HORVU1Hr1G002990.5	NA	partial	HORVU1Hr1G002990.5:401	HORVU1Hr1G002990.5:977	NA	no	9,11,9,11,9,11,11,9,11,11,11,11,11,11	yes	NA	8.5e-19	0.0052	0.0025	NA	NA	NA	NA	NA	NA	NA	NA	NA
Hordeum vulgare	HORVU1Hr1G003010.1	CNL	complete	HORVU1Hr1G003010.1:15	HORVU1Hr1G003010.1:1078	NVDSRQLEVISVWGMGGLGKTTLVRDVYQSQDLSREFEKRACVTVLRPFDLDALLKDLATQFGYNGVSEMDTKLAGHKYLIVLDDLSSNAEWDIIIPHFPAMETSSRIIVTTRVKGIAIHCSRKHENVYELQSLGHSSALDLFTEKVFGKTTNFYEQYPELSEPANLILKKCSGLPLAIVTIGGFLSNQTKSSLEWRRLNERMSTELEMNP	no	17,16,4,5,1,6,4,5,10,3,12,2,8,7,11,9,9	yes	4.5e-51	0.0068	NA	NA	NA	400	372	426	no	no	NA	NA	NA
Hordeum vulgare	HORVU1Hr1G003010.2	CNL	complete	HORVU1Hr1G003010.2:15	HORVU1Hr1G003010.2:1078	NVDSRQLEVISVWGMGGLGKTTLVRDVYQSQDLSREFEKRACVTVLRPFDLDALLKDLATQFGYNGVSEMDTKLAGHKYLIVLDDLSSNAEWDIIIPHFPAMETSSRIIVTTRVKGIAIHCSRKHENVYELQSLGHSSALDLFTEKVFGKTTNFYEQYPELSEPANLILKKCSGLPLAIVTIGGFLSNQTKSSLEWRRLNERMSTELEMNP	no	17,16,4,5,1,6,4,5,10,3,12,2,8,7,11,9,9	yes	4.5e-51	0.0068	NA	NA	NA	400	372	426	no	no	NA	NA	NA
Hordeum vulgare	HORVU1Hr1G003010.3	CNL	partial	HORVU1Hr1G003010.3:15	HORVU1Hr1G003010.3:537	NVDSRQLEVISVWGMGGLGKTTLVRDVYQSQDLSREFEKRACVTVLRPFDLDALLKDLATQFGYNGVSEMDTKLAGHKYLIVLDDLSSNAEWDIIIPHFPAMETSSRIIVTTRVKGIAIHCSRKHENVYELQSLGHSSALDLFTEKVHIV	no	17,16,4,5,1,6,4,5	NA	2.4e-36	NA	NA	NA	NA	NA	NA	NA	NA	NA	NA	NA	NA
Hordeum vulgare	HORVU1Hr1G003010.4	CNL	partial	HORVU1Hr1G003010.4:15	HORVU1Hr1G003010.4:330	NA	no	17,16,4,5	NA	4.3e-10	NA	NA	NA	NA	NA	NA	NA	NA	NA	NA	NA	NA
Hordeum vulgare	HORVU1Hr1G003010.5	CNL	partial	HORVU1Hr1G003010.5:51	HORVU1Hr1G003010.5:366	NA	no	17,16,4,5	NA	8e-10	NA	NA	NA	NA	NA	NA	NA	NA	NA	NA	NA	NA
Hordeum vulgare	HORVU1Hr1G003010.6	CNL	complete	HORVU1Hr1G003010.6:17	HORVU1Hr1G003010.6:866	NVDSRQLEVISVWGMGGLGKTTLVRDVYQSQDLSREFEKRACVTVLRPFDLDALLKDLATQFGYNGVSEMDTKLAGHKYLIVLDDLSSNAEWDIIIPHFPAMETSSRIIVTTRVKGIAIHCSRKHENVYELQSLGHSSALDLFTEKVFGKTTNFYEQYPELSEPANLILKKCSGLPLAIVTIGGFLSNQTKSSLEWRRLNERMSTELEMNP	no	17,16,4,5,1,6,4,5,10,3,12,2,8,7,11,9	yes	6.9e-52	NA	NA	NA	NA	402	372	133	no	no	yes	NA	NA
Hordeum vulgare	HORVU1Hr1G003010.7	CNL	partial	HORVU1Hr1G003010.7:64	HORVU1Hr1G003010.7:177	NVDSRQLEVISVWGMGGLGKTTLVRDVYQSQDLSREFEKRACVTVLRPFDLDALLKDLATQFGYNGVSEMDTKLAGHKYLIVLDDLSSNAEWDIIIPHFPAMETSSRIIVTTRVKGIAIHCSRKHENVYELQSLGHSSALDLFTEK	no	1,6,4,5	NA	1.2e-25	NA	NA	NA	NA	NA	NA	NA	NA	NA	NA	NA	NA
Hordeum vulgare	HORVU1Hr1G003100.1	NA	partial	HORVU1Hr1G003100.1:416	HORVU1Hr1G003100.1:967	NA	no	9,11,9,11,9,11,11,9,11,11,11	yes	NA	1.5e-14	0.0079	0.0055	NA	NA	NA	NA	NA	NA	NA	NA	NA
Hordeum vulgare	HORVU1Hr1G003100.10	NA	partial	HORVU1Hr1G003100.10:416	HORVU1Hr1G003100.10:967	NA	no	9,11,9,11,9,11,11,9,11,11,11	yes	NA	2.1e-14	0.0076	0.0033	NA	NA	NA	NA	NA	NA	NA	NA	NA
Hordeum vulgare	HORVU1Hr1G003100.11	NA	partial	HORVU1Hr1G003100.11:373	HORVU1Hr1G003100.11:869	NA	no	9,11,9,11,9,11,11,9,11,11,11	yes	NA	7e-15	0.0063	0.0026	NA	NA	NA	NA	NA	NA	NA	NA	NA
Hordeum vulgare	HORVU1Hr1G003100.2	NA	partial	HORVU1Hr1G003100.2:416	HORVU1Hr1G003100.2:967	NA	no	9,11,9,11,9,11,11,9,11,11,11	yes	NA	1.5e-14	0.0079	0.0055	NA	NA	NA	NA	NA	NA	NA	NA	NA
Hordeum vulgare	HORVU1Hr1G003100.3	NA	partial	HORVU1Hr1G003100.3:440	HORVU1Hr1G003100.3:991	NA	no	9,11,9,11,9,11,11,9,11,11,11	yes	NA	1.7e-14	0.009	0.0064	NA	NA	NA	NA	NA	NA	NA	NA	NA
Hordeum vulgare	HORVU1Hr1G003100.4	NA	partial	HORVU1Hr1G003100.4:416	HORVU1Hr1G003100.4:967	NA	no	9,11,9,11,9,11,11,9,11,11,11	yes	NA	1.5e-14	0.0079	0.0055	NA	NA	NA	NA	NA	NA	NA	NA	NA
Hordeum vulgare	HORVU1Hr1G003100.5	NA	partial	HORVU1Hr1G003100.5:416	HORVU1Hr1G003100.5:967	NA	no	9,11,9,11,9,11,11,9,11,11,11	yes	NA	1.5e-14	0.0079	0.0055	NA	NA	NA	NA	NA	NA	NA	NA	NA
Hordeum vulgare	HORVU1Hr1G003100.6	NA	partial	HORVU1Hr1G003100.6:440	HORVU1Hr1G003100.6:991	NA	no	9,11,9,11,9,11,11,9,11,11,11	yes	NA	1.7e-14	0.009	0.0064	NA	NA	NA	NA	NA	NA	NA	NA	NA
Hordeum vulgare	HORVU1Hr1G003100.7	NA	partial	HORVU1Hr1G003100.7:416	HORVU1Hr1G003100.7:967	NA	no	9,11,9,11,9,11,11,9,11,11,11	yes	NA	1.5e-14	0.0079	0.0055	NA	NA	NA	NA	NA	NA	NA	NA	NA
Hordeum vulgare	HORVU1Hr1G003100.8	NA	partial	HORVU1Hr1G003100.8:440	HORVU1Hr1G003100.8:991	NA	no	9,11,9,11,9,11,11,9,11,11,11	yes	NA	1.7e-14	0.009	0.0064	NA	NA	NA	NA	NA	NA	NA	NA	NA
Hordeum vulgare	HORVU1Hr1G003140.1	CNL	partial	HORVU1Hr1G003140.1:265	HORVU1Hr1G003140.1:1004	NA	no	2,9,11,9,11,9,11,11,9,11,11,11,11,11,11	yes	NA	9.8e-16	0.0053	0.00016	NA	161	428	469	no	no	NA	NA	NA
Hordeum vulgare	HORVU1Hr1G003140.2	CNL	partial	HORVU1Hr1G003140.2:265	HORVU1Hr1G003140.2:1004	NA	no	2,9,11,9,11,9,11,11,9,11,11,11,11,11,11	yes	NA	9.8e-16	0.0053	0.00016	NA	161	428	469	no	no	yes	NA	NA
Hordeum vulgare	HORVU1Hr1G003140.3	CNL	partial	HORVU1Hr1G003140.3:265	HORVU1Hr1G003140.3:1004	NA	no	2,9,11,9,11,9,11,11,9,11,11,11,11,11,11	yes	NA	9.8e-16	0.0053	0.00016	NA	161	428	469	no	no	NA	NA	NA
Hordeum vulgare	HORVU1Hr1G003140.4	CNL	partial	HORVU1Hr1G003140.4:265	HORVU1Hr1G003140.4:1004	NA	no	2,9,11,9,11,9,11,11,9,11,11,11,11,11,11	yes	NA	9.8e-16	0.0053	0.00016	NA	161	428	469	no	no	NA	NA	NA
Hordeum vulgare	HORVU1Hr1G003140.5	CNL	partial	HORVU1Hr1G003140.5:265	HORVU1Hr1G003140.5:1004	NA	no	2,9,11,9,11,9,11,11,9,11,11,11,11,11,11	yes	NA	9.8e-16	0.0053	0.00016	NA	161	428	469	no	no	NA	NA	NA
Hordeum vulgare	HORVU1Hr1G003140.6	CNL	partial	HORVU1Hr1G003140.6:265	HORVU1Hr1G003140.6:1004	NA	no	2,9,11,9,11,9,11,11,9,11,11,11,11,11,11	yes	NA	9.8e-16	0.0053	0.00016	NA	161	428	469	no	no	NA	NA	NA
Hordeum vulgare	HORVU1Hr1G003140.7	CNL	partial	HORVU1Hr1G003140.7:207	HORVU1Hr1G003140.7:946	NA	no	2,9,11,9,11,9,11,11,9,11,11,11,11,11,11	yes	NA	8.7e-16	0.0044	8.1e-05	NA	103	428	467	no	no	NA	NA	NA
Hordeum vulgare	HORVU1Hr1G004030.1	CNL	partial	HORVU1Hr1G004030.1:52	HORVU1Hr1G004030.1:680	AAAQAQLRVVAIVGFGGSGKTTLAKAVYDTVHVEGSLRCAWVDGHSLDHKDADGIIKHISEKLHLGEGCSATLPTEYHQDRYLIVVDDIKDKHLMHWNTLRNAFRNNGRIIVTTATQSVANRCCNHPREEDRCTFGYVYNMKSLGEEDSRKIALLGRCTPELVLGAAKLLKKCGGLPLALYSVACQLSCENVLTATGTFCNKLCNELGTYL	no	17,16,1,4,5,3,2,9	yes	9.3e-17	NA	NA	NA	NA	207	382	168	no	no	yes	NA	NA
Hordeum vulgare	HORVU1Hr1G004040.1	CNL	partial	HORVU1Hr1G004040.1:201	HORVU1Hr1G004040.1:1083	NDGQPEHKVASIVGTSGVGKTTLARQVYHKLGGQFECRAFVQASPKQDMKMLLTSILSQVRRHHLPDSFDVHKLLFEIEAHLQDKTYIIVIDNLQASSTWDIINHALPKENCCSRILTTTEVDAIAQTCCADTSKYIFKKESLSEDESRELFLGTVFGHEAGCPQVLKEVSNEIIKRSGGLPLAIIILASLLVGQPASSIEHWNHIKNSLS	no	1,6,4,5,10,3,12,2,8,7,11,17,16	yes	1.2e-39	NA	NA	NA	NA	178	378	589	no	no	yes	NA	NA
Hordeum vulgare	HORVU1Hr1G004040.2	CNL	partial	HORVU1Hr1G004040.2:61	HORVU1Hr1G004040.2:653	DASNKRLKKVSIVGFGGLGKTTLAKAVYEKIKGDFDCRAFVPIGRNPDIKKVFRDILIELGNSHSDLTILDAKQLMVKLREFLENKRYLVIIDDIWDESLWEIIKFAFSNRNNLGSRLITTTRIVSVSNSCCSSADDSVYQMKPLSLDDSRKLFHKRIFSSETECPNEFEQVSRDILKKCGGVPLAIITIASALAGGQKVKPKHEWYILLQ	no	1,6,4,5,10,3,12,2,8,7,9,9,20	yes	9e-47	1.7e-06	NA	0.051	NA	32	387	392	TRUE	no	NA	NA	NA
Hordeum vulgare	HORVU1Hr1G004060.1	CNL	partial	HORVU1Hr1G004060.1:201	HORVU1Hr1G004060.1:1083	NDGQPEHKVASIVGTSGVGKTTLARQVYHKLGGQFECRAFVQASPKQDMKMLLTSILSQVRRHHLPDSFDVHKLLFEIEAHLQDKTYIIVIDNLQASSTWDIINHALPKENCCSRILTTTEVDAIAQTCCADTSKYIFKKESLSEDESRELFLGTVFGHEAGCPQVLKEVSNEIIKRSGGLPLAIIILASLLVGQPASSIEHWNHIKNSLS	no	1,6,4,5,10,3,12,2,8,7,11,17,16	yes	1.2e-39	NA	NA	NA	NA	178	378	589	no	no	yes	NA	NA
Hordeum vulgare	HORVU1Hr1G004080.1	CNL	complete	HORVU1Hr1G004080.1:10	HORVU1Hr1G004080.1:652	DACNKRLKKISIVGFGGLGKTTLVRAVYEKIKGVFDCRVFVPVGQNPDIKKIFKDILIDLGKSHSDVAMLDERQLINKLHEFLENKRYLIIIDDIWDQNLWKDINIAFSNRNNLGSRLITTTRILNLSESCCSSSDDSIYQMEPLSTDDSRRLFCKRIFPSETVCPNEFEQVSRDILKKCGEVPLAIITIASALAGGEKVKPKHEWDILLQ	no	17,16,14,1,6,4,5,10,3,12,2,8,7,9,11	NA	4.1e-45	6.3e-06	NA	NA	NA	NA	NA	NA	NA	NA	NA	NA	NA
Hordeum vulgare	HORVU1Hr1G004080.10	CNL	complete	HORVU1Hr1G004080.10:10	HORVU1Hr1G004080.10:652	DACNKRLKKISIVGFGGLGKTTLVRAVYEKIKGVFDCRVFVPVGQNPDIKKIFKDILIDLGKSHSDVAMLDERQLINKLHEFLENKRYLIIIDDIWDQNLWKDINIAFSNRNNLGSRLITTTRILNLSESCCSSSDDSIYQMEPLSTDDSRRLFCKRIFPSETVCPNEFEQVSRDILKKCGEVPLAIITIASALAGGEKVKPKHEWDILLQ	no	17,16,14,1,6,4,5,10,3,12,2,8,7,9,11	NA	4.1e-45	6.3e-06	NA	NA	NA	NA	NA	NA	NA	NA	NA	NA	NA
Hordeum vulgare	HORVU1Hr1G004080.11	CNL	complete	HORVU1Hr1G004080.11:10	HORVU1Hr1G004080.11:652	DACNKRLKKISIVGFGGLGKTTLVRAVYEKIKGVFDCRVFVPVGQNPDIKKIFKDILIDLGKSHSDVAMLDERQLINKLHEFLENKRYLIIIDDIWDQNLWKDINIAFSNRNNLGSRLITTTRILNLSESCCSSSDDSIYQMEPLSTDDSRRLFCKRIFPSETVCPNEFEQVSRDILKKCGEVPLAIITIASALAGGEKVKPKHEWDILLQ	no	17,16,14,1,6,4,5,10,3,12,2,8,7,9,11	NA	4.1e-45	6.3e-06	NA	NA	NA	NA	NA	NA	NA	NA	NA	NA	NA
Hordeum vulgare	HORVU1Hr1G004080.12	CNL	complete	HORVU1Hr1G004080.12:10	HORVU1Hr1G004080.12:652	DACNKRLKKISIVGFGGLGKTTLVRAVYEKIKGVFDCRVFVPVGQNPDIKKIFKDILIDLGKSHSDVAMLDERQLINKLHEFLENKRYLIIIDDIWDQNLWKDINIAFSNRNNLGSRLITTTRILNLSESCCSSSDDSIYQMEPLSTDDSRRLFCKRIFPSETVCPNEFEQVSRDILKKCGEVPLAIITIASALAGGEKVKPKHEWDILLQ	no	17,16,14,1,6,4,5,10,3,12,2,8,7,9,11	NA	4.1e-45	6.3e-06	NA	NA	NA	NA	NA	NA	NA	NA	NA	NA	NA
Hordeum vulgare	HORVU1Hr1G004080.13	CNL	complete	HORVU1Hr1G004080.13:10	HORVU1Hr1G004080.13:652	DACNKRLKKISIVGFGGLGKTTLVRAVYEKIKGVFDCRVFVPVGQNPDIKKIFKDILIDLGKSHSDVAMLDERQLINKLHEFLENKRYLIIIDDIWDQNLWKDINIAFSNRNNLGSRLITTTRILNLSESCCSSSDDSIYQMEPLSTDDSRRLFCKRIFPSETVCPNEFEQVSRDILKKCGEVPLAIITIASALAGGEKVKPKHEWDILLQ	no	17,16,14,1,6,4,5,10,3,12,2,8,7,9,11	NA	4.1e-45	6.3e-06	NA	NA	NA	NA	NA	NA	NA	NA	NA	NA	NA
Hordeum vulgare	HORVU1Hr1G004080.14	CNL	complete	HORVU1Hr1G004080.14:10	HORVU1Hr1G004080.14:652	DACNKRLKKISIVGFGGLGKTTLVRAVYEKIKGVFDCRVFVPVGQNPDIKKIFKDILIDLGKSHSDVAMLDERQLINKLHEFLENKRYLIIIDDIWDQNLWKDINIAFSNRNNLGSRLITTTRILNLSESCCSSSDDSIYQMEPLSTDDSRRLFCKRIFPSETVCPNEFEQVSRDILKKCGEVPLAIITIASALAGGEKVKPKHEWDILLQ	no	17,16,14,1,6,4,5,10,3,12,2,8,7,9,11	NA	4.1e-45	6.3e-06	NA	NA	NA	NA	NA	NA	NA	NA	NA	NA	NA
Hordeum vulgare	HORVU1Hr1G004080.15	CNL	complete	HORVU1Hr1G004080.15:10	HORVU1Hr1G004080.15:652	DACNKRLKKISIVGFGGLGKTTLVRAVYEKIKGVFDCRVFVPVGQNPDIKKIFKDILIDLGKSHSDVAMLDERQLINKLHEFLENKRYLIIIDDIWDQNLWKDINIAFSNRNNLGSRLITTTRILNLSESCCSSSDDSIYQMEPLSTDDSRRLFCKRIFPSETVCPNEFEQVSRDILKKCGEVPLAIITIASALAGGEKVKPKHEWDILLQ	no	17,16,14,1,6,4,5,10,3,12,2,8,7,9,11	NA	4.1e-45	6.3e-06	NA	NA	NA	NA	NA	NA	NA	NA	NA	NA	NA
Hordeum vulgare	HORVU1Hr1G004080.16	CNL	partial	HORVU1Hr1G004080.16:4	HORVU1Hr1G004080.16:322	NA	no	10,3,12,2,8,7,9,11	NA	4.7e-09	9.7e-07	NA	0.92	NA	NA	NA	NA	NA	NA	NA	NA	NA
Hordeum vulgare	HORVU1Hr1G004080.17	CNL	complete	HORVU1Hr1G004080.17:10	HORVU1Hr1G004080.17:652	DACNKRLKKISIVGFGGLGKTTLVRAVYEKIKGVFDCRVFVPVGQNPDIKKIFKDILIDLGKSHSDVAMLDERQLINKLHEFLENKRYLIIIDDIWDQNLWKDINIAFSNRNNLGSRLITTTRILNLSESCCSSSDDSIYQMEPLSTDDSRRLFCKRIFPSETVCPNEFEQVSRDILKKCGEVPLAIITIASALAGGEKVKPKHEWDILLQ	no	17,16,14,1,6,4,5,10,3,12,2,8,7,9,11	NA	4.1e-45	6.3e-06	NA	NA	NA	NA	NA	NA	NA	NA	NA	NA	NA
Hordeum vulgare	HORVU1Hr1G004080.18	CNL	partial	HORVU1Hr1G004080.18:4	HORVU1Hr1G004080.18:322	NA	no	10,3,12,2,8,7,9,11	NA	4.7e-09	9.7e-07	NA	0.92	NA	NA	NA	NA	NA	NA	NA	NA	NA
Hordeum vulgare	HORVU1Hr1G004080.19	CNL	complete	HORVU1Hr1G004080.19:10	HORVU1Hr1G004080.19:652	DACNKRLKKISIVGFGGLGKTTLVRAVYEKIKGVFDCRVFVPVGQNPDIKKIFKDILIDLGKSHSDVAMLDERQLINKLHEFLENKRYLIIIDDIWDQNLWKDINIAFSNRNNLGSRLITTTRILNLSESCCSSSDDSIYQMEPLSTDDSRRLFCKRIFPSETVCPNEFEQVSRDILKKCGEVPLAIITIASALAGGEKVKPKHEWDILLQ	no	17,16,14,1,6,4,5,10,3,12,2,8,7,9,11	NA	4.1e-45	6.3e-06	NA	NA	NA	NA	NA	NA	NA	NA	NA	NA	NA
Hordeum vulgare	HORVU1Hr1G004080.2	CNL	complete	HORVU1Hr1G004080.2:10	HORVU1Hr1G004080.2:652	DACNKRLKKISIVGFGGLGKTTLVRAVYEKIKGVFDCRVFVPVGQNPDIKKIFKDILIDLGKSHSDVAMLDERQLINKLHEFLENKRYLIIIDDIWDQNLWKDINIAFSNRNNLGSRLITTTRILNLSESCCSSSDDSIYQMEPLSTDDSRRLFCKRIFPSETVCPNEFEQVSRDILKKCGEVPLAIITIASALAGGEKVKPKHEWDILLQ	no	17,16,14,1,6,4,5,10,3,12,2,8,7,9,11	NA	4.1e-45	6.3e-06	NA	NA	NA	NA	NA	NA	NA	NA	NA	NA	NA
Hordeum vulgare	HORVU1Hr1G004080.20	CNL	complete	HORVU1Hr1G004080.20:10	HORVU1Hr1G004080.20:652	DACNKRLKKISIVGFGGLGKTTLVRAVYEKIKGVFDCRVFVPVGQNPDIKKIFKDILIDLGKSHSDVAMLDERQLINKLHEFLENKRYLIIIDDIWDQNLWKDINIAFSNRNNLGSRLITTTRILNLSESCCSSSDDSIYQMEPLSTDDSRRLFCKRIFPSETVCPNEFEQVSRDILKKCGEVPLAIITIASALAGGEKVKPKHEWDILLQ	no	17,16,14,1,6,4,5,10,3,12,2,8,7,9,11	NA	4.1e-45	6.3e-06	NA	NA	NA	NA	NA	NA	NA	NA	NA	NA	NA
Hordeum vulgare	HORVU1Hr1G004080.21	CNL	complete	HORVU1Hr1G004080.21:10	HORVU1Hr1G004080.21:652	DACNKRLKKISIVGFGGLGKTTLVRAVYEKIKGVFDCRVFVPVGQNPDIKKIFKDILIDLGKSHSDVAMLDERQLINKLHEFLENKRYLIIIDDIWDQNLWKDINIAFSNRNNLGSRLITTTRILNLSESCCSSSDDSIYQMEPLSTDDSRRLFCKRIFPSETVCPNEFEQVSRDILKKCGEVPLAIITIASALAGGEKVKPKHEWDILLQ	no	17,16,14,1,6,4,5,10,3,12,2,8,7,9,11	NA	4.1e-45	6.3e-06	NA	NA	NA	NA	NA	NA	NA	NA	NA	NA	NA
Hordeum vulgare	HORVU1Hr1G004080.22	CNL	complete	HORVU1Hr1G004080.22:10	HORVU1Hr1G004080.22:652	DACNKRLKKISIVGFGGLGKTTLVRAVYEKIKGVFDCRVFVPVGQNPDIKKIFKDILIDLGKSHSDVAMLDERQLINKLHEFLENKRYLIIIDDIWDQNLWKDINIAFSNRNNLGSRLITTTRILNLSESCCSSSDDSIYQMEPLSTDDSRRLFCKRIFPSETVCPNEFEQVSRDILKKCGEVPLAIITIASALAGGEKVKPKHEWDILLQ	no	17,16,14,1,6,4,5,10,3,12,2,8,7,9,11	NA	4.1e-45	6.3e-06	NA	NA	NA	NA	NA	NA	NA	NA	NA	NA	NA
Hordeum vulgare	HORVU1Hr1G004080.23	CNL	complete	HORVU1Hr1G004080.23:10	HORVU1Hr1G004080.23:652	DACNKRLKKISIVGFGGLGKTTLVRAVYEKIKGVFDCRVFVPVGQNPDIKKIFKDILIDLGKSHSDVAMLDERQLINKLHEFLENKRYLIIIDDIWDQNLWKDINIAFSNRNNLGSRLITTTRILNLSESCCSSSDDSIYQMEPLSTDDSRRLFCKRIFPSETVCPNEFEQVSRDILKKCGEVPLAIITIASALAGGEKVKPKHEWDILLQ	no	17,16,14,1,6,4,5,10,3,12,2,8,7,9,11	NA	4.1e-45	6.3e-06	NA	NA	NA	NA	NA	NA	NA	NA	NA	NA	NA
Hordeum vulgare	HORVU1Hr1G004080.24	CNL	complete	HORVU1Hr1G004080.24:10	HORVU1Hr1G004080.24:652	DACNKRLKKISIVGFGGLGKTTLVRAVYEKIKGVFDCRVFVPVGQNPDIKKIFKDILIDLGKSHSDVAMLDERQLINKLHEFLENKRYLIIIDDIWDQNLWKDINIAFSNRNNLGSRLITTTRILNLSESCCSSSDDSIYQMEPLSTDDSRRLFCKRIFPSETVCPNEFEQVSRDILKKCGEVPLAIITIASALAGGEKVKPKHEWDILLQ	no	17,16,14,1,6,4,5,10,3,12,2,8,7,9,11	NA	4.1e-45	6.3e-06	NA	NA	NA	NA	NA	NA	NA	NA	NA	NA	NA
Hordeum vulgare	HORVU1Hr1G004080.25	CNL	complete	HORVU1Hr1G004080.25:10	HORVU1Hr1G004080.25:652	DACNKRLKKISIVGFGGLGKTTLVRAVYEKIKGVFDCRVFVPVGQNPDIKKIFKDILIDLGKSHSDVAMLDERQLINKLHEFLENKRYLIIIDDIWDQNLWKDINIAFSNRNNLGSRLITTTRILNLSESCCSSSDDSIYQMEPLSTDDSRRLFCKRIFPSETVCPNEFEQVSRDILKKCGEVPLAIITIASALAGGEKVKPKHEWDILLQ	no	17,16,14,1,6,4,5,10,3,12,2,8,7,9,11	NA	4.1e-45	6.3e-06	NA	NA	NA	NA	NA	NA	NA	NA	NA	NA	NA
Hordeum vulgare	HORVU1Hr1G004080.26	CNL	complete	HORVU1Hr1G004080.26:10	HORVU1Hr1G004080.26:652	DACNKRLKKISIVGFGGLGKTTLVRAVYEKIKGVFDCRVFVPVGQNPDIKKIFKDILIDLGKSHSDVAMLDERQLINKLHEFLENKRYLIIIDDIWDQNLWKDINIAFSNRNNLGSRLITTTRILNLSESCCSSSDDSIYQMEPLSTDDSRRLFCKRIFPSETVCPNEFEQVSRDILKKCGEVPLAIITIASALAGGEKVKPKHEWDILLQ	no	17,16,14,1,6,4,5,10,3,12,2,8,7,9,11	NA	4.1e-45	6.3e-06	NA	NA	NA	NA	NA	NA	NA	NA	NA	NA	NA
Hordeum vulgare	HORVU1Hr1G004080.27	CNL	complete	HORVU1Hr1G004080.27:10	HORVU1Hr1G004080.27:652	DACNKRLKKISIVGFGGLGKTTLVRAVYEKIKGVFDCRVFVPVGQNPDIKKIFKDILIDLGKSHSDVAMLDERQLINKLHEFLENKRYLIIIDDIWDQNLWKDINIAFSNRNNLGSRLITTTRILNLSESCCSSSDDSIYQMEPLSTDDSRRLFCKRIFPSETVCPNEFEQVSRDILKKCGEVPLAIITIASALAGGEKVKPKHEWDILLQ	no	17,16,14,1,6,4,5,10,3,12,2,8,7,9,11	NA	4.1e-45	6.3e-06	NA	NA	NA	NA	NA	NA	NA	NA	NA	NA	NA
Hordeum vulgare	HORVU1Hr1G004080.28	CNL	complete	HORVU1Hr1G004080.28:10	HORVU1Hr1G004080.28:652	DACNKRLKKISIVGFGGLGKTTLVRAVYEKIKGVFDCRVFVPVGQNPDIKKIFKDILIDLGKSHSDVAMLDERQLINKLHEFLENKRYLIIIDDIWDQNLWKDINIAFSNRNNLGSRLITTTRILNLSESCCSSSDDSIYQMEPLSTDDSRRLFCKRIFPSETVCPNEFEQVSRDILKKCGEVPLAIITIASALAGGEKVKPKHEWDILLQ	no	17,16,14,1,6,4,5,10,3,12,2,8,7,9,11	NA	4.1e-45	6.3e-06	NA	NA	NA	NA	NA	NA	NA	NA	NA	NA	NA
Hordeum vulgare	HORVU1Hr1G004080.29	CNL	partial	HORVU1Hr1G004080.29:10	HORVU1Hr1G004080.29:252	DACNKRLKKISIVGFGGLGKTTLVRAVYEKIKGVFDCRVFVPVGQNPDIKKIFKDILIDLGKSHSDVAMLDERQLINKLHEFLEN	no	17,16,14,1,6	NA	3.4e-14	NA	NA	NA	NA	NA	NA	NA	NA	NA	NA	NA	NA
Hordeum vulgare	HORVU1Hr1G004080.3	CNL	complete	HORVU1Hr1G004080.3:10	HORVU1Hr1G004080.3:652	DACNKRLKKISIVGFGGLGKTTLVRAVYEKIKGVFDCRVFVPVGQNPDIKKIFKDILIDLGKSHSDVAMLDERQLINKLHEFLENKRYLIIIDDIWDQNLWKDINIAFSNRNNLGSRLITTTRILNLSESCCSSSDDSIYQMEPLSTDDSRRLFCKRIFPSETVCPNEFEQVSRDILKKCGEVPLAIITIASALAGGEKVKPKHEWDILLQ	no	17,16,14,1,6,4,5,10,3,12,2,8,7,9,11	NA	4.1e-45	6.3e-06	NA	NA	NA	NA	NA	NA	NA	NA	NA	NA	NA
Hordeum vulgare	HORVU1Hr1G004080.4	CNL	complete	HORVU1Hr1G004080.4:10	HORVU1Hr1G004080.4:652	DACNKRLKKISIVGFGGLGKTTLVRAVYEKIKGVFDCRVFVPVGQNPDIKKIFKDILIDLGKSHSDVAMLDERQLINKLHEFLENKRYLIIIDDIWDQNLWKDINIAFSNRNNLGSRLITTTRILNLSESCCSSSDDSIYQMEPLSTDDSRRLFCKRIFPSETVCPNEFEQVSRDILKKCGEVPLAIITIASALAGGEKVKPKHEWDILLQ	no	17,16,14,1,6,4,5,10,3,12,2,8,7,9,11	NA	4.1e-45	6.3e-06	NA	NA	NA	NA	NA	NA	NA	NA	NA	NA	NA
Hordeum vulgare	HORVU1Hr1G004080.5	CNL	complete	HORVU1Hr1G004080.5:10	HORVU1Hr1G004080.5:652	DACNKRLKKISIVGFGGLGKTTLVRAVYEKIKGVFDCRVFVPVGQNPDIKKIFKDILIDLGKSHSDVAMLDERQLINKLHEFLENKRYLIIIDDIWDQNLWKDINIAFSNRNNLGSRLITTTRILNLSESCCSSSDDSIYQMEPLSTDDSRRLFCKRIFPSETVCPNEFEQVSRDILKKCGEVPLAIITIASALAGGEKVKPKHEWDILLQ	no	17,16,14,1,6,4,5,10,3,12,2,8,7,9,11	NA	4.1e-45	6.3e-06	NA	NA	NA	NA	NA	NA	NA	NA	NA	NA	NA
Hordeum vulgare	HORVU1Hr1G004080.6	CNL	complete	HORVU1Hr1G004080.6:10	HORVU1Hr1G004080.6:652	DACNKRLKKISIVGFGGLGKTTLVRAVYEKIKGVFDCRVFVPVGQNPDIKKIFKDILIDLGKSHSDVAMLDERQLINKLHEFLENKRYLIIIDDIWDQNLWKDINIAFSNRNNLGSRLITTTRILNLSESCCSSSDDSIYQMEPLSTDDSRRLFCKRIFPSETVCPNEFEQVSRDILKKCGEVPLAIITIASALAGGEKVKPKHEWDILLQ	no	17,16,14,1,6,4,5,10,3,12,2,8,7,9,11	NA	4.1e-45	6.3e-06	NA	NA	NA	NA	NA	NA	NA	NA	NA	NA	NA
Hordeum vulgare	HORVU1Hr1G004080.7	CNL	complete	HORVU1Hr1G004080.7:10	HORVU1Hr1G004080.7:652	DACNKRLKKISIVGFGGLGKTTLVRAVYEKIKGVFDCRVFVPVGQNPDIKKIFKDILIDLGKSHSDVAMLDERQLINKLHEFLENKRYLIIIDDIWDQNLWKDINIAFSNRNNLGSRLITTTRILNLSESCCSSSDDSIYQMEPLSTDDSRRLFCKRIFPSETVCPNEFEQVSRDILKKCGEVPLAIITIASALAGGEKVKPKHEWDILLQ	no	17,16,14,1,6,4,5,10,3,12,2,8,7,9,11	NA	4.1e-45	6.3e-06	NA	NA	NA	NA	NA	NA	NA	NA	NA	NA	NA
Hordeum vulgare	HORVU1Hr1G004080.8	CNL	complete	HORVU1Hr1G004080.8:10	HORVU1Hr1G004080.8:652	DACNKRLKKISIVGFGGLGKTTLVRAVYEKIKGVFDCRVFVPVGQNPDIKKIFKDILIDLGKSHSDVAMLDERQLINKLHEFLENKRYLIIIDDIWDQNLWKDINIAFSNRNNLGSRLITTTRILNLSESCCSSSDDSIYQMEPLSTDDSRRLFCKRIFPSETVCPNEFEQVSRDILKKCGEVPLAIITIASALAGGEKVKPKHEWDILLQ	no	17,16,14,1,6,4,5,10,3,12,2,8,7,9,11	NA	4.1e-45	6.3e-06	NA	NA	NA	NA	NA	NA	NA	NA	NA	NA	NA
Hordeum vulgare	HORVU1Hr1G004080.9	CNL	complete	HORVU1Hr1G004080.9:10	HORVU1Hr1G004080.9:652	DACNKRLKKISIVGFGGLGKTTLVRAVYEKIKGVFDCRVFVPVGQNPDIKKIFKDILIDLGKSHSDVAMLDERQLINKLHEFLENKRYLIIIDDIWDQNLWKDINIAFSNRNNLGSRLITTTRILNLSESCCSSSDDSIYQMEPLSTDDSRRLFCKRIFPSETVCPNEFEQVSRDILKKCGEVPLAIITIASALAGGEKVKPKHEWDILLQ	no	17,16,14,1,6,4,5,10,3,12,2,8,7,9,11	NA	4.1e-45	6.3e-06	NA	NA	NA	NA	NA	NA	NA	NA	NA	NA	NA
Hordeum vulgare	HORVU1Hr1G004140.1	CNL	partial	HORVU1Hr1G004140.1:76	HORVU1Hr1G004140.1:666	DASNKRLKKVSIVGFGGLGKTTLAKAVYENIKGDFDCRAFVPVGQNPDMKKVFRDILIDLRVSNSELAELDERQLINKLHEFLENKRYLVIIDDIWDAKLWERINFAFSNRNNLGSRLIITTRIFSVSKSSCMLPDDAVYEMKPLSDDDSRSLFYKRIFPSESGCPNEFEQVSEDILKKCGGVPLAIITIASSLASGQKVKPKSEWDILLQ	no	1,6,4,5,10,3,12,2,8,7,9,11,20	yes	1.5e-46	0.0044	NA	0.13	NA	47	387	404	TRUE	no	NA	NA	NA
Hordeum vulgare	HORVU1Hr1G004880.1	CNL	partial	HORVU1Hr1G004880.1:9	HORVU1Hr1G004880.1:195	NA	no	10,3,12,2,8,7	NA	1.3e-06	NA	NA	NA	NA	NA	NA	NA	NA	NA	NA	NA	NA
Hordeum vulgare	HORVU1Hr1G005180.1	CNL	partial	HORVU1Hr1G005180.1:31	HORVU1Hr1G005180.1:834	KATMTELPVVSIVGMGGVGKTTMAQEICKNANVKKHFGPIIWTCVSDDFDTKRLIKAIIEGLGGDASSDNLNVLISKLEGRVKSEKFLLVLDDMWDDILKDDAAECKSLCACLKNGAEGSRILVTTRFPEVAELVGPLNNYVLNGLEPKVFWDFFKSCAFGPTSSCNNQESLELERIAKDIVPKLKGSPLAAKTIGRLLRMELSTIHWKNI	no	1,6,4,5,3,12,2,8,7,9,11,11,11,11,11,11,11,11	yes	2.4e-38	0.00031	0.34	NA	NA	0	376	463	TRUE	no	NA	NA	NA
Hordeum vulgare	HORVU1Hr1G005180.10	CNL	partial	HORVU1Hr1G005180.10:31	HORVU1Hr1G005180.10:834	KATMTELPVVSIVGMGGVGKTTMAQEICKNANVKKHFGPIIWTCVSDDFDTKRLIKAIIEGLGGDASSDNLNVLISKLEGRVKSEKFLLVLDDMWDDILKDDAAECKSLCACLKNGAEGSRILVTTRFPEVAELVGPLNNYVLNGLEPKVFWDFFKSCAFGPTSSCNNQESLELERIAKDIVPKLKGSPLAAKTIGRLLRMELSTIHWKNI	no	1,6,4,5,3,12,2,8,7,9,11,11,11,11,11,11,11,11	yes	2.4e-38	0.0004	0.35	NA	NA	0	376	499	TRUE	no	NA	NA	NA
Hordeum vulgare	HORVU1Hr1G005180.11	CNL	partial	HORVU1Hr1G005180.11:31	HORVU1Hr1G005180.11:834	KATMTELPVVSIVGMGGVGKTTMAQEICKNANVKKHFGPIIWTCVSDDFDTKRLIKAIIEGLGGDASSDNLNVLISKLEGRVKSEKFLLVLDDMWDDILKDDAAECKSLCACLKNGAEGSRILVTTRFPEVAELVGPLNNYVLNGLEPKVFWDFFKSCAFGPTSSCNNQESLELERIAKDIVPKLKGSPLAAKTIGRLLRMELSTIHWKNI	no	1,6,4,5,3,12,2,8,7,9,11,11,11,11,11,11,11,11	yes	2.4e-38	0.00031	0.34	NA	NA	0	376	463	TRUE	no	NA	NA	NA
Hordeum vulgare	HORVU1Hr1G005180.12	CNL	partial	HORVU1Hr1G005180.12:31	HORVU1Hr1G005180.12:834	KATMTELPVVSIVGMGGVGKTTMAQEICKNANVKKHFGPIIWTCVSDDFDTKRLIKAIIEGLGGDASSDNLNVLISKLEGRVKSEKFLLVLDDMWDDILKDDAAECKSLCACLKNGAEGSRILVTTRFPEVAELVGPLNNYVLNGLEPKVFWDFFKSCAFGPTSSCNNQESLELERIAKDIVPKLKGSPLAAKTIGRLLRMELSTIHWKNI	no	1,6,4,5,3,12,2,8,7,9,11,11,11,11,11,11,11,11	yes	2.4e-38	0.00031	0.34	NA	NA	0	376	463	TRUE	no	NA	NA	NA
Hordeum vulgare	HORVU1Hr1G005180.13	CNL	partial	HORVU1Hr1G005180.13:31	HORVU1Hr1G005180.13:834	KATMTELPVVSIVGMGGVGKTTMAQEICKNANVKKHFGPIIWTCVSDDFDTKRLIKAIIEGLGGDASSDNLNVLISKLEGRVKSEKFLLVLDDMWDDILKDDAAECKSLCACLKNGAEGSRILVTTRFPEVAELVGPLNNYVLNGLEPKVFWDFFKSCAFGPTSSCNNQESLELERIAKDIVPKLKGSPLAAKTIGRLLRMELSTIHWKNI	no	1,6,4,5,3,12,2,8,7,9,11,11,11,11,11,11,11,11	yes	2.4e-38	0.00031	0.34	NA	NA	0	376	463	TRUE	no	NA	NA	NA
Hordeum vulgare	HORVU1Hr1G005180.14	CNL	partial	HORVU1Hr1G005180.14:24	HORVU1Hr1G005180.14:205	NA	no	12,2,8,7,9	NA	NA	NA	NA	NA	NA	NA	NA	NA	NA	NA	NA	NA	NA
Hordeum vulgare	HORVU1Hr1G005180.15	CNL	partial	HORVU1Hr1G005180.15:31	HORVU1Hr1G005180.15:834	KATMTELPVVSIVGMGGVGKTTMAQEICKNANVKKHFGPIIWTCVSDDFDTKRLIKAIIEGLGGDASSDNLNVLISKLEGRVKSEKFLLVLDDMWDDILKDDAAECKSLCACLKNGAEGSRILVTTRFPEVAELVGPLNNYVLNGLEPKVFWDFFKSCAFGPTSSCNNQESLELERIAKDIVPKLKGSPLAAKTIGRLLRMELSTIHWKNI	no	1,6,4,5,3,12,2,8,7,9,11,11,11,11,11,11,11,11	yes	2.4e-38	0.00032	0.35	NA	NA	0	376	465	TRUE	no	NA	NA	NA
Hordeum vulgare	HORVU1Hr1G005180.16	CNL	partial	HORVU1Hr1G005180.16:31	HORVU1Hr1G005180.16:834	KATMTELPVVSIVGMGGVGKTTMAQEICKNANVKKHFGPIIWTCVSDDFDTKRLIKAIIEGLGGDASSDNLNVLISKLEGRVKSEKFLLVLDDMWDDILKDDAAECKSLCACLKNGAEGSRILVTTRFPEVAELVGPLNNYVLNGLEPKVFWDFFKSCAFGPTSSCNNQESLELERIAKDIVPKLKGSPLAAKTIGRLLRMELSTIHWKNI	no	1,6,4,5,3,12,2,8,7,9,11,11,11,11,11,11,11,11	yes	2.4e-38	0.00039	0.35	NA	NA	0	376	498	TRUE	no	NA	NA	NA
Hordeum vulgare	HORVU1Hr1G005180.17	CNL	partial	HORVU1Hr1G005180.17:31	HORVU1Hr1G005180.17:834	KATMTELPVVSIVGMGGVGKTTMAQEICKNANVKKHFGPIIWTCVSDDFDTKRLIKAIIEGLGGDASSDNLNVLISKLEGRVKSEKFLLVLDDMWDDILKDDAAECKSLCACLKNGAEGSRILVTTRFPEVAELVGPLNNYVLNGLEPKVFWDFFKSCAFGPTSSCNNQESLELERIAKDIVPKLKGSPLAAKTIGRLLRMELSTIHWKNI	no	1,6,4,5,3,12,2,8,7,9,11,11,11,11,11,11,11,11	yes	2.4e-38	0.00032	0.35	NA	NA	0	376	465	TRUE	no	NA	NA	NA
Hordeum vulgare	HORVU1Hr1G005180.18	CNL	partial	HORVU1Hr1G005180.18:31	HORVU1Hr1G005180.18:834	KATMTELPVVSIVGMGGVGKTTMAQEICKNANVKKHFGPIIWTCVSDDFDTKRLIKAIIEGLGGDASSDNLNVLISKLEGRVKSEKFLLVLDDMWDDILKDDAAECKSLCACLKNGAEGSRILVTTRFPEVAELVGPLNNYVLNGLEPKVFWDFFKSCAFGPTSSCNNQESLELERIAKDIVPKLKGSPLAAKTIGRLLRMELSTIHWKNI	no	1,6,4,5,3,12,2,8,7,9,11,11,11,11,11,11,11,11	yes	2.4e-38	0.00032	0.35	NA	NA	0	376	465	TRUE	no	NA	NA	NA
Hordeum vulgare	HORVU1Hr1G005180.19	CNL	partial	HORVU1Hr1G005180.19:31	HORVU1Hr1G005180.19:834	KATMTELPVVSIVGMGGVGKTTMAQEICKNANVKKHFGPIIWTCVSDDFDTKRLIKAIIEGLGGDASSDNLNVLISKLEGRVKSEKFLLVLDDMWDDILKDDAAECKSLCACLKNGAEGSRILVTTRFPEVAELVGPLNNYVLNGLEPKVFWDFFKSCAFGPTSSCNNQESLELERIAKDIVPKLKGSPLAAKTIGRLLRMELSTIHWKNI	no	1,6,4,5,3,12,2,8,7,9,11,11,11,11,11,11,11,11	yes	2.4e-38	0.00032	0.35	NA	NA	0	376	465	TRUE	no	NA	NA	NA
Hordeum vulgare	HORVU1Hr1G005180.2	CNL	partial	HORVU1Hr1G005180.2:31	HORVU1Hr1G005180.2:834	KATMTELPVVSIVGMGGVGKTTMAQEICKNANVKKHFGPIIWTCVSDDFDTKRLIKAIIEGLGGDASSDNLNVLISKLEGRVKSEKFLLVLDDMWDDILKDDAAECKSLCACLKNGAEGSRILVTTRFPEVAELVGPLNNYVLNGLEPKVFWDFFKSCAFGPTSSCNNQESLELERIAKDIVPKLKGSPLAAKTIGRLLRMELSTIHWKNI	no	1,6,4,5,3,12,2,8,7,9,11,11,11,11,11,11,11,11	yes	2.4e-38	0.00031	0.34	NA	NA	0	376	463	TRUE	no	NA	NA	NA
Hordeum vulgare	HORVU1Hr1G005180.20	CNL	partial	HORVU1Hr1G005180.20:31	HORVU1Hr1G005180.20:834	KATMTELPVVSIVGMGGVGKTTMAQEICKNANVKKHFGPIIWTCVSDDFDTKRLIKAIIEGLGGDASSDNLNVLISKLEGRVKSEKFLLVLDDMWDDILKDDAAECKSLCACLKNGAEGSRILVTTRFPEVAELVGPLNNYVLNGLEPKVFWDFFKSCAFGPTSSCNNQESLELERIAKDIVPKLKGSPLAAKTIGRLLRMELSTIHWKNI	no	1,6,4,5,3,12,2,8,7,9,11,11,11,11,11,11,11,11	yes	2.4e-38	0.00032	0.35	NA	NA	0	376	465	TRUE	no	NA	NA	NA
Hordeum vulgare	HORVU1Hr1G005180.21	CNL	partial	HORVU1Hr1G005180.21:31	HORVU1Hr1G005180.21:834	KATMTELPVVSIVGMGGVGKTTMAQEICKNANVKKHFGPIIWTCVSDDFDTKRLIKAIIEGLGGDASSDNLNVLISKLEGRVKSEKFLLVLDDMWDDILKDDAAECKSLCACLKNGAEGSRILVTTRFPEVAELVGPLNNYVLNGLEPKVFWDFFKSCAFGPTSSCNNQESLELERIAKDIVPKLKGSPLAAKTIGRLLRMELSTIHWKNI	no	1,6,4,5,3,12,2,8,7,9,11,11,11,11,11,11,11,11	yes	2.4e-38	0.00032	0.35	NA	NA	0	376	465	TRUE	no	NA	NA	NA
Hordeum vulgare	HORVU1Hr1G005180.22	CNL	partial	HORVU1Hr1G005180.22:31	HORVU1Hr1G005180.22:784	KATMTELPVVSIVGMGGVGKTTMAQEICKNANVKKHFGPIIWTCVSDDFDTKRLIKAIIEGLGGDASSDNLNVLISKLEGRVKSEKFLLVLDDMWDDILKDDAAECKSLCACLKNGAEGSRILVTTRFPEVAELVGPLNNYVLNGLEPKVFWDFFKSCAFGPTSSCNNQESLELERIAKDIVPKLKGSPLAAKTIGRLLRMELSTIHWKNI	no	1,6,4,5,3,12,2,8,7,9,11,11,11,11,11,11	yes	2.3e-38	0.00034	NA	NA	NA	0	376	425	TRUE	no	NA	NA	NA
Hordeum vulgare	HORVU1Hr1G005180.3	CNL	partial	HORVU1Hr1G005180.3:31	HORVU1Hr1G005180.3:834	KATMTELPVVSIVGMGGVGKTTMAQEICKNANVKKHFGPIIWTCVSDDFDTKRLIKAIIEGLGGDASSDNLNVLISKLEGRVKSEKFLLVLDDMWDDILKDDAAECKSLCACLKNGAEGSRILVTTRFPEVAELVGPLNNYVLNGLEPKVFWDFFKSCAFGPTSSCNNQESLELERIAKDIVPKLKGSPLAAKTIGRLLRMELSTIHWKNI	no	1,6,4,5,3,12,2,8,7,9,11,11,11,11,11,11,11,11	yes	2.4e-38	0.00031	0.34	NA	NA	0	376	463	TRUE	no	NA	NA	NA
Hordeum vulgare	HORVU1Hr1G005180.4	CNL	partial	HORVU1Hr1G005180.4:31	HORVU1Hr1G005180.4:834	KATMTELPVVSIVGMGGVGKTTMAQEICKNANVKKHFGPIIWTCVSDDFDTKRLIKAIIEGLGGDASSDNLNVLISKLEGRVKSEKFLLVLDDMWDDILKDDAAECKSLCACLKNGAEGSRILVTTRFPEVAELVGPLNNYVLNGLEPKVFWDFFKSCAFGPTSSCNNQESLELERIAKDIVPKLKGSPLAAKTIGRLLRMELSTIHWKNI	no	1,6,4,5,3,12,2,8,7,9,11,11,11,11,11,11,11,11	yes	2.4e-38	0.00031	0.35	NA	NA	0	376	464	TRUE	no	NA	NA	NA
Hordeum vulgare	HORVU1Hr1G005180.5	CNL	partial	HORVU1Hr1G005180.5:31	HORVU1Hr1G005180.5:834	KATMTELPVVSIVGMGGVGKTTMAQEICKNANVKKHFGPIIWTCVSDDFDTKRLIKAIIEGLGGDASSDNLNVLISKLEGRVKSEKFLLVLDDMWDDILKDDAAECKSLCACLKNGAEGSRILVTTRFPEVAELVGPLNNYVLNGLEPKVFWDFFKSCAFGPTSSCNNQESLELERIAKDIVPKLKGSPLAAKTIGRLLRMELSTIHWKNI	no	1,6,4,5,3,12,2,8,7,9,11,11,11,11,11,11,11,11	yes	2.4e-38	0.00031	0.34	NA	NA	0	376	463	TRUE	no	NA	NA	NA
Hordeum vulgare	HORVU1Hr1G005180.6	CNL	partial	HORVU1Hr1G005180.6:31	HORVU1Hr1G005180.6:834	KATMTELPVVSIVGMGGVGKTTMAQEICKNANVKKHFGPIIWTCVSDDFDTKRLIKAIIEGLGGDASSDNLNVLISKLEGRVKSEKFLLVLDDMWDDILKDDAAECKSLCACLKNGAEGSRILVTTRFPEVAELVGPLNNYVLNGLEPKVFWDFFKSCAFGPTSSCNNQESLELERIAKDIVPKLKGSPLAAKTIGRLLRMELSTIHWKNI	no	1,6,4,5,3,12,2,8,7,9,11,11,11,11,11,11,11,11	yes	2.4e-38	0.00031	0.34	NA	NA	0	376	463	TRUE	no	NA	NA	NA
Hordeum vulgare	HORVU1Hr1G005180.7	CNL	partial	HORVU1Hr1G005180.7:31	HORVU1Hr1G005180.7:834	KATMTELPVVSIVGMGGVGKTTMAQEICKNANVKKHFGPIIWTCVSDDFDTKRLIKAIIEGLGGDASSDNLNVLISKLEGRVKSEKFLLVLDDMWDDILKDDAAECKSLCACLKNGAEGSRILVTTRFPEVAELVGPLNNYVLNGLEPKVFWDFFKSCAFGPTSSCNNQESLELERIAKDIVPKLKGSPLAAKTIGRLLRMELSTIHWKNI	no	1,6,4,5,3,12,2,8,7,9,11,11,11,11,11,11,11,11	yes	2.4e-38	0.00031	0.34	NA	NA	0	376	463	TRUE	no	NA	NA	NA
Hordeum vulgare	HORVU1Hr1G005180.8	CNL	partial	HORVU1Hr1G005180.8:31	HORVU1Hr1G005180.8:834	KATMTELPVVSIVGMGGVGKTTMAQEICKNANVKKHFGPIIWTCVSDDFDTKRLIKAIIEGLGGDASSDNLNVLISKLEGRVKSEKFLLVLDDMWDDILKDDAAECKSLCACLKNGAEGSRILVTTRFPEVAELVGPLNNYVLNGLEPKVFWDFFKSCAFGPTSSCNNQESLELERIAKDIVPKLKGSPLAAKTIGRLLRMELSTIHWKNI	no	1,6,4,5,3,12,2,8,7,9,11,11,11,11,11,11,11,11	yes	2.4e-38	0.00031	0.34	NA	NA	0	376	463	TRUE	no	NA	NA	NA
Hordeum vulgare	HORVU1Hr1G005180.9	CNL	partial	HORVU1Hr1G005180.9:31	HORVU1Hr1G005180.9:834	KATMTELPVVSIVGMGGVGKTTMAQEICKNANVKKHFGPIIWTCVSDDFDTKRLIKAIIEGLGGDASSDNLNVLISKLEGRVKSEKFLLVLDDMWDDILKDDAAECKSLCACLKNGAEGSRILVTTRFPEVAELVGPLNNYVLNGLEPKVFWDFFKSCAFGPTSSCNNQESLELERIAKDIVPKLKGSPLAAKTIGRLLRMELSTIHWKNI	no	1,6,4,5,3,12,2,8,7,9,11,11,11,11,11,11,11,11	yes	2.4e-38	0.0004	0.35	NA	NA	0	376	499	TRUE	no	NA	NA	NA
Hordeum vulgare	HORVU1Hr1G005470.1	CNL	complete	HORVU1Hr1G005470.1:14	HORVU1Hr1G005470.1:646	EENKHRRRVLSIVGFGGLGKTTLANEVYLKIKGHFDCHAFVSVSQKPDTKKIIKDLISQVSRKAEFTKDMESWDEKKSIQKLRELLQDKRYLVIIDDIWSILAWNAINCAFPENNSSSRIITTTRILEVARSSCPNHADQIYEVTPLSDLLSERLFCNRIFGSEERCPDMLIDVSNTILKKCGGLPLAIISISGLLANKPRVKEEWEKVKR	no	17,16,1,6,4,5,10,3,12,2,8,7,11,9,9	yes	4.4e-50	NA	NA	NA	NA	172	381	224	no	no	NA	NA	NA
Hordeum vulgare	HORVU1Hr1G005470.11	CNL	partial	HORVU1Hr1G005470.11:1	HORVU1Hr1G005470.11:519	NA	no	4,5,10,3,12,2,8,7,11,9,9,20	NA	7.5e-25	NA	NA	NA	NA	NA	NA	NA	NA	NA	NA	NA	NA
Hordeum vulgare	HORVU1Hr1G005470.2	CNL	complete	HORVU1Hr1G005470.2:14	HORVU1Hr1G005470.2:794	EENKHRRRVLSIVGFGGLGKTTLANEVYLKIKGHFDCHAFVSVSQKPDTKKIIKDLISQVSRKAEFTKDMESWDEKKSIQKLRELLQDKRYLVIIDDIWSILAWNAINCAFPENNSSSRIITTTRILEVARSSCPNHADQIYEVTPLSDLLSERLFCNRIFGSEERCPDMLIDVSNTILKKCGGLPLAIISISGLLANKPRVKEEWEKVKR	no	17,16,1,6,4,5,10,3,12,2,8,7,11,9,9,20	yes	7.4e-50	NA	NA	NA	NA	172	381	377	no	no	NA	NA	NA
Hordeum vulgare	HORVU1Hr1G005470.3	CNL	complete	HORVU1Hr1G005470.3:14	HORVU1Hr1G005470.3:794	EENKHRRRVLSIVGFGGLGKTTLANEVYLKIKGHFDCHAFVSVSQKPDTKKIIKDLISQVSRKAEFTKDMESWDEKKSIQKLRELLQDKRYLVIIDDIWSILAWNAINCAFPENNSSSRIITTTRILEVARSSCPNHADQIYEVTPLSDLLSERLFCNRIFGSEERCPDMLIDVSNTILKKCGGLPLAIISISGLLANKPRVKEEWEKVKR	no	17,16,1,6,4,5,10,3,12,2,8,7,11,9,9,20	yes	6.9e-50	NA	NA	NA	NA	172	381	352	no	no	NA	NA	NA
Hordeum vulgare	HORVU1Hr1G005470.4	CNL	complete	HORVU1Hr1G005470.4:14	HORVU1Hr1G005470.4:794	EENKHRRRVLSIVGFGGLGKTTLANEVYLKIKGHFDCHAFVSVSQKPDTKKIIKDLISQVSRKAEFTKDMESWDEKKSIQKLRELLQDKRYLVIIDDIWSILAWNAINCAFPENNSSSRIITTTRILEVARSSCPNHADQIYEVTPLSDLLSERLFCNRIFGSEERCPDMLIDVSNTILKKCGGLPLAIISISGLLANKPRVKEEWEKVKR	no	17,16,1,6,4,5,10,3,12,2,8,7,11,9,9,20	yes	7.4e-50	NA	NA	NA	NA	172	381	377	no	no	NA	NA	NA
Hordeum vulgare	HORVU1Hr1G005470.5	CNL	complete	HORVU1Hr1G005470.5:14	HORVU1Hr1G005470.5:646	EENKHRRRVLSIVGFGGLGKTTLANEVYLKIKGHFDCHAFVSVSQKPDTKKIIKDLISQVSRKAEFTKDMESWDEKKSIQKLRELLQDKRYLVIIDDIWSILAWNAINCAFPENNSSSRIITTTRILEVARSSCPNHADQIYEVTPLSDLLSERLFCNRIFGSEERCPDMLIDVSNTILKKCGGLPLAIISISGLLANKPRVKEEWEKVKR	no	17,16,1,6,4,5,10,3,12,2,8,7,11,9,9	yes	5.8e-50	NA	NA	NA	NA	172	381	291	no	no	NA	NA	NA
Hordeum vulgare	HORVU1Hr1G005470.6	CNL	complete	HORVU1Hr1G005470.6:14	HORVU1Hr1G005470.6:794	EENKHRRRVLSIVGFGGLGKTTLANEVYLKIKGHFDCHAFVSVSQKPDTKKIIKDLISQVSRKAEFTKDMESWDEKKSIQKLRELLQDKRYLVIIDDIWSILAWNAINCAFPENNSSSRIITTTRILEVARSSCPNHADQIYEVTPLSDLLSERLFCNRIFGSEERCPDMLIDVSNTILKKCGGLPLAIISISGLLANKPRVKEEWEKVKR	no	17,16,1,6,4,5,10,3,12,2,8,7,11,9,9,20	yes	7.4e-50	NA	NA	NA	NA	172	381	377	no	no	NA	NA	NA
Hordeum vulgare	HORVU1Hr1G005470.7	CNL	partial	HORVU1Hr1G005470.7:14	HORVU1Hr1G005470.7:248	EENKHRRRVLSIVGFGGLGKTTLANEVYLKIKGHFDCHAFVSVSQKPDTKKIIKDLISQVSRKAEFTKDMESWDEKKSIQKL	no	17,16,1,6	NA	1e-15	NA	NA	NA	NA	NA	NA	NA	NA	NA	NA	NA	NA
Hordeum vulgare	HORVU1Hr1G005470.8	CNL	complete	HORVU1Hr1G005470.8:13	HORVU1Hr1G005470.8:625	EENKHRRRVLSIVGFGGLGKTTLSQKPDTKKIIKDLISQVSRKAEFTKDMESWDEKKSIQKLRELLQDKRYLVIIDDIWSILAWNAINCAFPENNSSSRIITTTRILEVARSSCPNHADQIYEVTPLSDLLSERLFCNRIFGSEERCPDMLIDVSNTILKKCGGLPLAIISISGLLANKPRVKEEWEKVKRSIGSDLTKNQSLEGMKNILS	no	17,16,1,4,5,10,3,12,2,8,7,11,9,9	NA	2.7e-37	0.09	NA	NA	NA	NA	NA	NA	NA	NA	NA	NA	NA
Hordeum vulgare	HORVU1Hr1G005470.9	CNL	complete	HORVU1Hr1G005470.9:13	HORVU1Hr1G005470.9:745	EENKHRRRVLSIVGFGGLGKTTLANEVYLKIKGHFDCHAFVSVSQKPDTKKIIKDLISQVSRKAEFTKDMESWDEKKSIQKLRELLQDKRYLVIIDDIWSILAWNAINCAFPENNSSSRIITTTRILEVARSSCPNHADQIYEVTPLSDLLSERLFCNRIFGSEERCPDMLIDVSNTILKKCGGLPLAIISISGLLANKPRVKEEWEKVKR	no	17,16,1,6,4,5,10,3,12,2,8,7,11,9,9,20	yes	3.9e-50	NA	NA	NA	NA	123	381	316	no	no	yes	NA	NA
Hordeum vulgare	HORVU1Hr1G005520.1	CNL	partial	HORVU1Hr1G005520.1:4	HORVU1Hr1G005520.1:466	NA	no	10,3,12,2,8,7,11,9,9,20	NA	3.5e-10	NA	NA	NA	NA	NA	NA	NA	NA	NA	NA	NA	NA
Hordeum vulgare	HORVU1Hr1G005520.2	CNL	partial	HORVU1Hr1G005520.2:4	HORVU1Hr1G005520.2:318	NA	no	10,3,12,2,8,7,11,9,9	NA	3.5e-10	0.0001	NA	0.95	NA	NA	NA	NA	NA	NA	NA	NA	NA
Hordeum vulgare	HORVU1Hr1G005520.3	CNL	partial	HORVU1Hr1G005520.3:4	HORVU1Hr1G005520.3:318	NA	no	10,3,12,2,8,7,11,9,9	NA	3.5e-10	0.0001	NA	0.95	NA	NA	NA	NA	NA	NA	NA	NA	NA
Hordeum vulgare	HORVU1Hr1G005520.4	CNL	partial	HORVU1Hr1G005520.4:4	HORVU1Hr1G005520.4:318	NA	no	10,3,12,2,8,7,11,9,9	NA	3.5e-10	0.0001	NA	0.95	NA	NA	NA	NA	NA	NA	NA	NA	NA
Hordeum vulgare	HORVU1Hr1G005520.5	CNL	partial	HORVU1Hr1G005520.5:4	HORVU1Hr1G005520.5:318	NA	no	10,3,12,2,8,7,11,9,9	NA	3.5e-10	0.0001	NA	0.95	NA	NA	NA	NA	NA	NA	NA	NA	NA
Hordeum vulgare	HORVU1Hr1G005710.1	CNL	complete	HORVU1Hr1G005710.1:20	HORVU1Hr1G005710.1:845	GLEQRSIKVTTVWGMPGVGKTTLVAHVYNTLKVDFDAAAWVTVSKSCHIEDLLKKIAAQFGIAVDVANVEMRGLAESIHNYLQGKKYILVLDDVWTPLVWSEIRNAFPTSNCTGRFVITSRKHEVSLLATWEFAIHLEPLQEHHSWLLFCKGAFWNDDDKECPVELQELAHKFIAKCQGLPIAIACIGRLLSWKRPTSAEWEDVYRGLDSQ	no	17,16,1,6,4,5,10,3,2,8,7,9,9,9,11	yes	1.6e-49	1.7e-07	NA	NA	NA	171	378	380	no	no	NA	NA	NA
Hordeum vulgare	HORVU1Hr1G005710.10	CNL	complete	HORVU1Hr1G005710.10:20	HORVU1Hr1G005710.10:845	GLEQRSIKVTTVWGMPGVGKTTLVAHVYNTLKVDFDAAAWVTVSKSCHIEDLLKKIAAQFGIAVDVANVEMRGLAESIHNYLQGKKYILVLDDVWTPLVWSEIRNAFPTSNCTGRFVITSRKHEVSLLATWEFAIHLEPLQEHHSWLLFCKGAFWNDDDKECPVELQELAHKFIAKCQGLPIAIACIGRLLSWKRPTSAEWEDVYRGLDSQ	no	17,16,1,6,4,5,10,3,2,8,7,9,9,9,11	yes	1.6e-49	1.7e-07	NA	NA	NA	171	378	380	no	no	NA	NA	NA
Hordeum vulgare	HORVU1Hr1G005710.11	CNL	complete	HORVU1Hr1G005710.11:20	HORVU1Hr1G005710.11:845	GLEQRSIKVTTVWGMPGVGKTTLVAHVYNTLKVDFDAAAWVTVSKSCHIEDLLKKIAAQFGIAVDVANVEMRGLAESIHNYLQGKKYILVLDDVWTPLVWSEIRNAFPTSNCTGRFVITSRKHEVSLLATWEFAIHLEPLQEHHSWLLFCKGAFWNDDDKECPVELQELAHKFIAKCQGLPIAIACIGRLLSWKRPTSAEWEDVYRGLDSQ	no	17,16,1,6,4,5,10,3,2,8,7,9,9,9,11	yes	1.6e-49	1.7e-07	NA	NA	NA	171	378	380	no	no	NA	NA	NA
Hordeum vulgare	HORVU1Hr1G005710.12	CNL	partial	HORVU1Hr1G005710.12:14	HORVU1Hr1G005710.12:434	NA	no	2,8,7,9,9,9,11	NA	NA	8.9e-09	NA	NA	NA	NA	NA	NA	NA	NA	NA	NA	NA
Hordeum vulgare	HORVU1Hr1G005710.13	CNL	partial	HORVU1Hr1G005710.13:14	HORVU1Hr1G005710.13:434	NA	no	2,8,7,9,9,9,11	NA	NA	8.9e-09	NA	NA	NA	NA	NA	NA	NA	NA	NA	NA	NA
Hordeum vulgare	HORVU1Hr1G005710.14	CNL	complete	HORVU1Hr1G005710.14:20	HORVU1Hr1G005710.14:845	GLEQRSIKVTTVWGMPGVGKTTLVAHVYNTLKVDFDAAAWVTVSKSCHIEDLLKKIAAQFGIAVDVANVEMRGLAESIHNYLQGKKYILVLDDVWTPLVWSEIRNAFPTSNCTGRFVITSRKHEVSLLATWEFAIHLEPLQEHHSWLLFCKGAFWNDDDKECPVELQELAHKFIAKCQGLPIAIACIGRLLSWKRPTSAEWEDVYRGLDSQ	no	17,16,1,6,4,5,10,3,2,8,7,9,9,9,11	yes	1.6e-49	1.7e-07	NA	NA	NA	171	378	380	no	no	NA	NA	NA
Hordeum vulgare	HORVU1Hr1G005710.15	CNL	complete	HORVU1Hr1G005710.15:20	HORVU1Hr1G005710.15:845	GLEQRSIKVTTVWGMPGVGKTTLVAHVYNTLKVDFDAAAWVTVSKSCHIEDLLKKIAAQFGIAVDVANVEMRGLAESIHNYLQGKKYILVLDDVWTPLVWSEIRNAFPTSNCTGRFVITSRKHEVSLLATWEFAIHLEPLQEHHSWLLFCKGAFWNDDDKECPVELQELAHKFIAKCQGLPIAIACIGRLLSWKRPTSAEWEDVYRGLDSQ	no	17,16,1,6,4,5,10,3,2,8,7,9,9,9,11	yes	1.6e-49	1.7e-07	NA	NA	NA	171	378	380	no	no	NA	NA	NA
Hordeum vulgare	HORVU1Hr1G005710.16	CNL	complete	HORVU1Hr1G005710.16:20	HORVU1Hr1G005710.16:845	GLEQRSIKVTTVWGMPGVGKTTLVAHVYNTLKVDFDAAAWVTVSKSCHIEDLLKKIAAQFGIAVDVANVEMRGLAESIHNYLQGKKYILVLDDVWTPLVWSEIRNAFPTSNCTGRFVITSRKHEVSLLATWEFAIHLEPLQEHHSWLLFCKGAFWNDDDKECPVELQELAHKFIAKCQGLPIAIACIGRLLSWKRPTSAEWEDVYRGLDSQ	no	17,16,1,6,4,5,10,3,2,8,7,9,9,9,11	yes	1.6e-49	1.7e-07	NA	NA	NA	171	378	380	no	no	NA	NA	NA
Hordeum vulgare	HORVU1Hr1G005710.17	CNL	partial	HORVU1Hr1G005710.17:14	HORVU1Hr1G005710.17:434	NA	no	2,8,7,9,9,9,11	NA	NA	8.9e-09	NA	NA	NA	NA	NA	NA	NA	NA	NA	NA	NA
Hordeum vulgare	HORVU1Hr1G005710.18	CNL	complete	HORVU1Hr1G005710.18:20	HORVU1Hr1G005710.18:845	GLEQRSIKVTTVWGMPGVGKTTLVAHVYNTLKVDFDAAAWVTVSKSCHIEDLLKKIAAQFGIAVDVANVEMRGLAESIHNYLQGKKYILVLDDVWTPLVWSEIRNAFPTSNCTGRFVITSRKHEVSLLATWEFAIHLEPLQEHHSWLLFCKGAFWNDDDKECPVELQELAHKFIAKCQGLPIAIACIGRLLSWKRPTSAEWEDVYRGLDSQ	no	17,16,1,6,4,5,10,3,2,8,7,9,9,9,11	yes	1.6e-49	1.7e-07	NA	NA	NA	171	378	380	no	no	NA	NA	NA
Hordeum vulgare	HORVU1Hr1G005710.19	CNL	complete	HORVU1Hr1G005710.19:20	HORVU1Hr1G005710.19:845	GLEQRSIKVTTVWGMPGVGKTTLVAHVYNTLKVDFDAAAWVTVSKSCHIEDLLKKIAAQFGIAVDVANVEMRGLAESIHNYLQGKKYILVLDDVWTPLVWSEIRNAFPTSNCTGRFVITSRKHEVSLLATWEFAIHLEPLQEHHSWLLFCKGAFWNDDDKECPVELQELAHKFIAKCQGLPIAIACIGRLLSWKRPTSAEWEDVYRGLDSQ	no	17,16,1,6,4,5,10,3,2,8,7,9,9,9,11	yes	1.6e-49	1.7e-07	NA	NA	NA	171	378	380	no	no	NA	NA	NA
Hordeum vulgare	HORVU1Hr1G005710.2	CNL	complete	HORVU1Hr1G005710.2:20	HORVU1Hr1G005710.2:845	GLEQRSIKVTTVWGMPGVGKTTLVAHVYNTLKVDFDAAAWVTVSKSCHIEDLLKKIAAQFGIAVDVANVEMRGLAESIHNYLQGKKYILVLDDVWTPLVWSEIRNAFPTSNCTGRFVITSRKHEVSLLATWEFAIHLEPLQEHHSWLLFCKGAFWNDDDKECPVELQELAHKFIAKCQGLPIAIACIGRLLSWKRPTSAEWEDVYRGLDSQ	no	17,16,1,6,4,5,10,3,2,8,7,9,9,9,11	yes	1.6e-49	1.7e-07	NA	NA	NA	171	378	380	no	no	NA	NA	NA
Hordeum vulgare	HORVU1Hr1G005710.20	CNL	complete	HORVU1Hr1G005710.20:20	HORVU1Hr1G005710.20:845	GLEQRSIKVTTVWGMPGVGKTTLVAHVYNTLKVDFDAAAWVTVSKSCHIEDLLKKIAAQFGIAVDVANVEMRGLAESIHNYLQGKKYILVLDDVWTPLVWSEIRNAFPTSNCTGRFVITSRKHEVSLLATWEFAIHLEPLQEHHSWLLFCKGAFWNDDDKECPVELQELAHKFIAKCQGLPIAIACIGRLLSWKRPTSAEWEDVYRGLDSQ	no	17,16,1,6,4,5,10,3,2,8,7,9,9,9,11	yes	1.6e-49	1.7e-07	NA	NA	NA	171	378	380	no	no	NA	NA	NA
Hordeum vulgare	HORVU1Hr1G005710.21	CNL	complete	HORVU1Hr1G005710.21:20	HORVU1Hr1G005710.21:845	GLEQRSIKVTTVWGMPGVGKTTLVAHVYNTLKVDFDAAAWVTVSKSCHIEDLLKKIAAQFGIAVDVANVEMRGLAESIHNYLQGKKYILVLDDVWTPLVWSEIRNAFPTSNCTGRFVITSRKHEVSLLATWEFAIHLEPLQEHHSWLLFCKGAFWNDDDKECPVELQELAHKFIAKCQGLPIAIACIGRLLSWKRPTSAEWEDVYRGLDSQ	no	17,16,1,6,4,5,10,3,2,8,7,9,9,9,11	yes	1.6e-49	1.7e-07	NA	NA	NA	171	378	380	no	no	NA	NA	NA
Hordeum vulgare	HORVU1Hr1G005710.22	CNL	complete	HORVU1Hr1G005710.22:20	HORVU1Hr1G005710.22:845	GLEQRSIKVTTVWGMPGVGKTTLVAHVYNTLKVDFDAAAWVTVSKSCHIEDLLKKIAAQFGIAVDVANVEMRGLAESIHNYLQGKKYILVLDDVWTPLVWSEIRNAFPTSNCTGRFVITSRKHEVSLLATWEFAIHLEPLQEHHSWLLFCKGAFWNDDDKECPVELQELAHKFIAKCQGLPIAIACIGRLLSWKRPTSAEWEDVYRGLDSQ	no	17,16,1,6,4,5,10,3,2,8,7,9,9,9,11	yes	1.6e-49	1.7e-07	NA	NA	NA	171	378	380	no	no	NA	NA	NA
Hordeum vulgare	HORVU1Hr1G005710.23	CNL	complete	HORVU1Hr1G005710.23:20	HORVU1Hr1G005710.23:845	GLEQRSIKVTTVWGMPGVGKTTLVAHVYNTLKVDFDAAAWVTVSKSCHIEDLLKKIAAQFGIAVDVANVEMRGLAESIHNYLQGKKYILVLDDVWTPLVWSEIRNAFPTSNCTGRFVITSRKHEVSLLATWEFAIHLEPLQEHHSWLLFCKGAFWNDDDKECPVELQELAHKFIAKCQGLPIAIACIGRLLSWKRPTSAEWEDVYRGLDSQ	no	17,16,1,6,4,5,10,3,2,8,7,9,9,9,11	yes	1.6e-49	1.7e-07	NA	NA	NA	171	378	380	no	no	NA	NA	NA
Hordeum vulgare	HORVU1Hr1G005710.24	CNL	complete	HORVU1Hr1G005710.24:20	HORVU1Hr1G005710.24:845	GLEQRSIKVTTVWGMPGVGKTTLVAHVYNTLKVDFDAAAWVTVSKSCHIEDLLKKIAAQFGIAVDVANVEMRGLAESIHNYLQGKKYILVLDDVWTPLVWSEIRNAFPTSNCTGRFVITSRKHEVSLLATWEFAIHLEPLQEHHSWLLFCKGAFWNDDDKECPVELQELAHKFIAKCQGLPIAIACIGRLLSWKRPTSAEWEDVYRGLDSQ	no	17,16,1,6,4,5,10,3,2,8,7,9,9,9,11	yes	1.6e-49	1.7e-07	NA	NA	NA	171	378	380	no	no	NA	NA	NA
Hordeum vulgare	HORVU1Hr1G005710.25	CNL	complete	HORVU1Hr1G005710.25:20	HORVU1Hr1G005710.25:845	GLEQRSIKVTTVWGMPGVGKTTLVAHVYNTLKVDFDAAAWVTVSKSCHIEDLLKKIAAQFGIAVDVANVEMRGLAESIHNYLQGKKYILVLDDVWTPLVWSEIRNAFPTSNCTGRFVITSRKHEVSLLATWEFAIHLEPLQEHHSWLLFCKGAFWNDDDKECPVELQELAHKFIAKCQGLPIAIACIGRLLSWKRPTSAEWEDVYRGLDSQ	no	17,16,1,6,4,5,10,3,2,8,7,9,9,9,11	yes	1.6e-49	1.7e-07	NA	NA	NA	171	378	380	no	no	NA	NA	NA
Hordeum vulgare	HORVU1Hr1G005710.26	CNL	complete	HORVU1Hr1G005710.26:20	HORVU1Hr1G005710.26:845	GLEQRSIKVTTVWGMPGVGKTTLVAHVYNTLKVDFDAAAWVTVSKSCHIEDLLKKIAAQFGIAVDVANVEMRGLAESIHNYLQGKKYILVLDDVWTPLVWSEIRNAFPTSNCTGRFVITSRKHEVSLLATWEFAIHLEPLQEHHSWLLFCKGAFWNDDDKECPVELQELAHKFIAKCQGLPIAIACIGRLLSWKRPTSAEWEDVYRGLDSQ	no	17,16,1,6,4,5,10,3,2,8,7,9,9,9,11	yes	1.6e-49	1.7e-07	NA	NA	NA	171	378	380	no	no	NA	NA	NA
Hordeum vulgare	HORVU1Hr1G005710.27	CNL	complete	HORVU1Hr1G005710.27:20	HORVU1Hr1G005710.27:845	GLEQRSIKVTTVWGMPGVGKTTLVAHVYNTLKVDFDAAAWVTVSKSCHIEDLLKKIAAQFGIAVDVANVEMRGLAESIHNYLQGKKYILVLDDVWTPLVWSEIRNAFPTSNCTGRFVITSRKHEVSLLATWEFAIHLEPLQEHHSWLLFCKGAFWNDDDKECPVELQELAHKFIAKCQGLPIAIACIGRLLSWKRPTSAEWEDVYRGLDSQ	no	17,16,1,6,4,5,10,3,2,8,7,9,9,9,11	yes	1.6e-49	1.7e-07	NA	NA	NA	171	378	380	no	no	NA	NA	NA
Hordeum vulgare	HORVU1Hr1G005710.28	CNL	complete	HORVU1Hr1G005710.28:20	HORVU1Hr1G005710.28:800	NA	no	17,16,4,5,10,3,2,8,7,9,9,9,11	yes	2.8e-32	1.2e-07	NA	NA	NA	171	333	305	no	no	yes	NA	NA
Hordeum vulgare	HORVU1Hr1G005710.3	CNL	complete	HORVU1Hr1G005710.3:20	HORVU1Hr1G005710.3:845	GLEQRSIKVTTVWGMPGVGKTTLVAHVYNTLKVDFDAAAWVTVSKSCHIEDLLKKIAAQFGIAVDVANVEMRGLAESIHNYLQGKKYILVLDDVWTPLVWSEIRNAFPTSNCTGRFVITSRKHEVSLLATWEFAIHLEPLQEHHSWLLFCKGAFWNDDDKECPVELQELAHKFIAKCQGLPIAIACIGRLLSWKRPTSAEWEDVYRGLDSQ	no	17,16,1,6,4,5,10,3,2,8,7,9,9,9,11	yes	1.6e-49	1.7e-07	NA	NA	NA	171	378	380	no	no	yes	NA	NA
Hordeum vulgare	HORVU1Hr1G005710.4	CNL	complete	HORVU1Hr1G005710.4:20	HORVU1Hr1G005710.4:845	GLEQRSIKVTTVWGMPGVGKTTLVAHVYNTLKVDFDAAAWVTVSKSCHIEDLLKKIAAQFGIAVDVANVEMRGLAESIHNYLQGKKYILVLDDVWTPLVWSEIRNAFPTSNCTGRFVITSRKHEVSLLATWEFAIHLEPLQEHHSWLLFCKGAFWNDDDKECPVELQELAHKFIAKCQGLPIAIACIGRLLSWKRPTSAEWEDVYRGLDSQ	no	17,16,1,6,4,5,10,3,2,8,7,9,9,9,11	yes	1.6e-49	1.7e-07	NA	NA	NA	171	378	380	no	no	NA	NA	NA
Hordeum vulgare	HORVU1Hr1G005710.5	CNL	complete	HORVU1Hr1G005710.5:20	HORVU1Hr1G005710.5:845	GLEQRSIKVTTVWGMPGVGKTTLVAHVYNTLKVDFDAAAWVTVSKSCHIEDLLKKIAAQFGIAVDVANVEMRGLAESIHNYLQGKKYILVLDDVWTPLVWSEIRNAFPTSNCTGRFVITSRKHEVSLLATWEFAIHLEPLQEHHSWLLFCKGAFWNDDDKECPVELQELAHKFIAKCQGLPIAIACIGRLLSWKRPTSAEWEDVYRGLDSQ	no	17,16,1,6,4,5,10,3,2,8,7,9,9,9,11	yes	1.6e-49	1.7e-07	NA	NA	NA	171	378	380	no	no	NA	NA	NA
Hordeum vulgare	HORVU1Hr1G005710.6	CNL	complete	HORVU1Hr1G005710.6:20	HORVU1Hr1G005710.6:845	GLEQRSIKVTTVWGMPGVGKTTLVAHVYNTLKVDFDAAAWVTVSKSCHIEDLLKKIAAQFGIAVDVANVEMRGLAESIHNYLQGKKYILVLDDVWTPLVWSEIRNAFPTSNCTGRFVITSRKHEVSLLATWEFAIHLEPLQEHHSWLLFCKGAFWNDDDKECPVELQELAHKFIAKCQGLPIAIACIGRLLSWKRPTSAEWEDVYRGLDSQ	no	17,16,1,6,4,5,10,3,2,8,7,9,9,9,11	yes	1.6e-49	1.7e-07	NA	NA	NA	171	378	380	no	no	NA	NA	NA
Hordeum vulgare	HORVU1Hr1G005710.7	CNL	complete	HORVU1Hr1G005710.7:20	HORVU1Hr1G005710.7:845	GLEQRSIKVTTVWGMPGVGKTTLVAHVYNTLKVDFDAAAWVTVSKSCHIEDLLKKIAAQFGIAVDVANVEMRGLAESIHNYLQGKKYILVLDDVWTPLVWSEIRNAFPTSNCTGRFVITSRKHEVSLLATWEFAIHLEPLQEHHSWLLFCKGAFWNDDDKECPVELQELAHKFIAKCQGLPIAIACIGRLLSWKRPTSAEWEDVYRGLDSQ	no	17,16,1,6,4,5,10,3,2,8,7,9,9,9,11	yes	1.6e-49	1.7e-07	NA	NA	NA	171	378	380	no	no	NA	NA	NA
Hordeum vulgare	HORVU1Hr1G005710.8	CNL	complete	HORVU1Hr1G005710.8:20	HORVU1Hr1G005710.8:845	GLEQRSIKVTTVWGMPGVGKTTLVAHVYNTLKVDFDAAAWVTVSKSCHIEDLLKKIAAQFGIAVDVANVEMRGLAESIHNYLQGKKYILVLDDVWTPLVWSEIRNAFPTSNCTGRFVITSRKHEVSLLATWEFAIHLEPLQEHHSWLLFCKGAFWNDDDKECPVELQELAHKFIAKCQGLPIAIACIGRLLSWKRPTSAEWEDVYRGLDSQ	no	17,16,1,6,4,5,10,3,2,8,7,9,9,9,11	yes	1.6e-49	1.7e-07	NA	NA	NA	171	378	380	no	no	NA	NA	NA
Hordeum vulgare	HORVU1Hr1G005710.9	CNL	complete	HORVU1Hr1G005710.9:20	HORVU1Hr1G005710.9:845	GLEQRSIKVTTVWGMPGVGKTTLVAHVYNTLKVDFDAAAWVTVSKSCHIEDLLKKIAAQFGIAVDVANVEMRGLAESIHNYLQGKKYILVLDDVWTPLVWSEIRNAFPTSNCTGRFVITSRKHEVSLLATWEFAIHLEPLQEHHSWLLFCKGAFWNDDDKECPVELQELAHKFIAKCQGLPIAIACIGRLLSWKRPTSAEWEDVYRGLDSQ	no	17,16,1,6,4,5,10,3,2,8,7,9,9,9,11	yes	1.6e-49	1.7e-07	NA	NA	NA	171	378	380	no	no	NA	NA	NA
Hordeum vulgare	HORVU1Hr1G009560.2	CNL	partial	HORVU1Hr1G009560.2:20	HORVU1Hr1G009560.2:412	NA	no	2,8,7,9,19	NA	NA	NA	NA	NA	NA	NA	NA	NA	NA	NA	NA	NA	NA
Hordeum vulgare	HORVU1Hr1G009560.3	CNL	partial	HORVU1Hr1G009560.3:20	HORVU1Hr1G009560.3:412	NA	no	2,8,7,9,19	NA	NA	NA	NA	NA	NA	NA	NA	NA	NA	NA	NA	NA	NA
Hordeum vulgare	HORVU1Hr1G011720.10	CNL	partial	HORVU1Hr1G011720.10:15	HORVU1Hr1G011720.10:491	RQIDEASRVISVWGIAGVGKSALVRSAYRKYLQNRSSLAGLGLLSDDQQQNQCLIVIDDLQSTKEWDRIKQALSFGEGCCVIIVTNDSSVARYCSGQDQQLMFNVKGLGNVHALDLFNTVLAAL	no	17,16,6,4,5,1,4,5	NA	1.8e-27	NA	NA	NA	NA	NA	NA	NA	NA	NA	NA	NA	NA
Hordeum vulgare	HORVU1Hr1G011720.11	CNL	partial	HORVU1Hr1G011720.11:15	HORVU1Hr1G011720.11:565	RQIDEASRVISVWGIAGVGKSALVRSAYRKYLQNRSSLAGLGDVCRRLLSDDQQQNQCLIVIDDLQSTKEWDRIKQALSFGEGCCVIIVTNDSSVARYCSGQDQQLMFNVKGLGNVHALDLFNTVYDGMRNHITRDEDMIKQSKLMLNKCGGLPKVIVAIGRFLAKSLNWEAMNTNFIHQLENNPELA	no	17,16,6,4,5,1,4,5,3	NA	2.2e-35	NA	NA	NA	NA	NA	NA	NA	NA	NA	NA	NA	NA
Hordeum vulgare	HORVU1Hr1G011720.12	CNL	complete	HORVU1Hr1G011720.12:15	HORVU1Hr1G011720.12:878	RQIDEASRVISVWGIAGVGKSALVRSAYRKYLQNRSSLAGLGMSFIHGWVNVLHPFNLREFCRSLLLNLSSEPAEIKKEADAELANMTNPVDVCRRLLSDDQQQNQCLIVIDDLQSTKEWDRIKQALSFGEGCCVIIVTNDSSVARYCSGQDQQLMFNVKGLGNVHALDLFNTVYDGMRNHITRDEDMIKQSKLMLNKCGGLPKVIVAIGR	no	17,16,6,4,5,1,4,5,3,2,8,11,9	yes	7.9e-39	0.0051	NA	NA	NA	385	400	256	no	no	yes	NA	NA
Hordeum vulgare	HORVU1Hr1G011720.13	CNL	partial	HORVU1Hr1G011720.13:15	HORVU1Hr1G011720.13:545	RQIDEASRVISVWGIAGVGKSALVRSAYRKYLQNRSSLAGLGMSFIHGWVNVLHPFNLREFCRSLLLNLSSEPAEIKKEADAELANMTNPVDVCRRLLSDDQQQNQCLIVIDDLQSTKEWDRIKQALSFGEGCCVIIVTNDSSVARYCSGQDQQLMFNVKGLG	no	17,16,6,4,5,1,4,5	NA	4.8e-30	NA	NA	NA	NA	NA	NA	NA	NA	NA	NA	NA	NA
Hordeum vulgare	HORVU1Hr1G011720.14	CNL	partial	HORVU1Hr1G011720.14:15	HORVU1Hr1G011720.14:341	NA	no	17,16,6,4,5	NA	2.9e-14	NA	NA	NA	NA	NA	NA	NA	NA	NA	NA	NA	NA
Hordeum vulgare	HORVU1Hr1G011720.15	CNL	complete	HORVU1Hr1G011720.15:15	HORVU1Hr1G011720.15:878	RQIDEASRVISVWGIAGVGKSALVRSAYRKYLQNRSSLAGLGMSFIHGWVNVLHPFNLREFCRSLLLNLSSEPAEIKKEADAELANMTNPVDVCRRLLSDDQQQNQCLIVIDDLQSTKEWDRIKQALSFGEGCCVIIVTNDSSVARYCSGQDQQLMFNVKGLGNVHALDLFNTVYDGMRNHITRDEDMIKQSKLMLNKCGGLPKVIVAIGR	no	17,16,6,4,5,1,4,5,3,2,8,11,9	yes	7.9e-39	0.0051	NA	NA	NA	385	400	256	no	no	NA	NA	NA
Hordeum vulgare	HORVU1Hr1G011720.16	CNL	complete	HORVU1Hr1G011720.16:15	HORVU1Hr1G011720.16:878	RQIDEASRVISVWGIAGVGKSALVRSAYRKYLQNRSSLAGLGMSFIHGWVNVLHPFNLREFCRSLLLNLSSEPAEIKKEADAELANMTNPVDVCRRLLSDDQQQNQCLIVIDDLQSTKEWDRIKQALSFGEGCCVIIVTNDSSVARYCSGQDQQLMFNVKGLGNVHALDLFNTVYDGMRNHITRDEDMIKQSKLMLNKCGGLPKVIVAIGR	no	17,16,6,4,5,1,4,5,3,2,8,11,9	yes	7.9e-39	0.0051	NA	NA	NA	385	400	256	no	no	NA	NA	NA
Hordeum vulgare	HORVU1Hr1G011720.2	CNL	partial	HORVU1Hr1G011720.2:32	HORVU1Hr1G011720.2:505	RQIDEASRVISVWGIAGVGKSALVRSAYRKYLQNRSSLAGLGMSFIHGWVNVLHPFNLREFCRSLLLNLSSEPAEIKKEADAELANMTNPVDVCRRLLSDDQQQNQCLIVIDDLQSTKEWDRIKQALSFGEGCCVIIVTNDSSVARYCSGQDQQLMFNVKGLGNVHALDLFNTVYDGMRNHITRDEDMIKQSKLMLNKCGGLPKVIVAIGR	no	1,4,5,3,2,8,11,9	NA	9e-24	0.0099	NA	NA	NA	NA	NA	NA	NA	NA	NA	NA	NA
Hordeum vulgare	HORVU1Hr1G011720.20	CNL	partial	HORVU1Hr1G011720.20:32	HORVU1Hr1G011720.20:505	RQIDEASRVISVWGIAGVGKSALVRSAYRKYLQNRSSLAGLGMSFIHGWVNVLHPFNLREFCRSLLLNLSSEPAEIKKEADAELANMTNPVDVCRRLLSDDQQQNQCLIVIDDLQSTKEWDRIKQALSFGEGCCVIIVTNDSSVARYCSGQDQQLMFNVKGLGNVHALDLFNTVYDGMRNHITRDEDMIKQSKLMLNKCGGLPKVIVAIGR	no	1,4,5,3,2,8,11,9	NA	9e-24	0.0099	NA	NA	NA	NA	NA	NA	NA	NA	NA	NA	NA
Hordeum vulgare	HORVU1Hr1G011720.4	CNL	partial	HORVU1Hr1G011720.4:15	HORVU1Hr1G011720.4:545	RQIDEASRVISVWGIAGVGKSALVRSAYRKYLQNRSSLAGLGMSFIHGWVNVLHPFNLREFCRSLLLNLSSEPAEIKKEADAELANMTNPVDVCRRLLSDDQQQNQCLIVIDDLQSTKEWDRIKQALSFGEGCCVIIVTNDSSVARYCSGQDQQLMFNVKGLG	no	17,16,6,4,5,1,4,5	NA	4.8e-30	NA	NA	NA	NA	NA	NA	NA	NA	NA	NA	NA	NA
Hordeum vulgare	HORVU1Hr1G011720.5	CNL	complete	HORVU1Hr1G011720.5:15	HORVU1Hr1G011720.5:878	RQIDEASRVISVWGIAGVGKSALVRSAYRKYLQNRSSLAGLGMSFIHGWVNVLHPFNLREFCRSLLLNLSSEPAEIKKEADAELANMTNPVDVCRRLLSDDQQQNQCLIVIDDLQSTKEWDRIKQALSFGEGCCVIIVTNDSSVARYCSGQDQQLMFNVKGLGNVHALDLFNTVYDGMRNHITRDEDMIKQSKLMLNKCGGLPKVIVAIGR	no	17,16,6,4,5,1,4,5,3,2,8,11,9	yes	7.9e-39	0.0051	NA	NA	NA	385	400	256	no	no	NA	NA	NA
Hordeum vulgare	HORVU1Hr1G011720.6	CNL	partial	HORVU1Hr1G011720.6:15	HORVU1Hr1G011720.6:497	RQIDEASRVISVWGIAGVGKSALVRSAYRKYLQNRSSLAGLGMSFIHGLLSDDQQQNQCLIVIDDLQSTKEWDRIKQALSFGEGCCVIIVTNDSSVARYCSGQDQQLMFNVKGLG	no	17,16,6,4,5,1,4,5	NA	4.5e-26	NA	NA	NA	NA	NA	NA	NA	NA	NA	NA	NA	NA
Hordeum vulgare	HORVU1Hr1G011720.7	CNL	partial	HORVU1Hr1G011720.7:15	HORVU1Hr1G011720.7:545	RQIDEASRVISVWGIAGVGKSALVRSAYRKYLQNRSSLAGLGMSFIHGWVNVLHPFNLREFCRSLLLNLSSEPAEIKKEADAELANMTNPVDVCRRLLSDDQQQNQCLIVIDDLQSTKEWDRIKQALSFGEGCCVIIVTNDSSVARYCSGQDQQLMFNVKGLGNVHALDLFNTVLAAL	no	17,16,6,4,5,1,4,5	NA	1.7e-31	NA	NA	NA	NA	NA	NA	NA	NA	NA	NA	NA	NA
Hordeum vulgare	HORVU1Hr1G011720.8	CNL	complete	HORVU1Hr1G011720.8:15	HORVU1Hr1G011720.8:868	RQIDEASRVISVWGIAGVGKSALVRSAYRKYLQNRSSLAGLGMSFIHGWVNVLHPFNLREFCRSLLLNLSSEPAEIKKEADAELANMTNPVDVCRRLLSDDQQQNQCLIVIDDLQSTKEWDRIKQALSFGEGCCVIIVTNDSSVARYCSGQDQQLMFNVKGLGVYDGMRNHITRDEDMIKQSKLMLNKCGGLPKVIVAIGRFLAKSLNWEA	no	17,16,6,4,5,1,4,5,3,2,8,11,9	yes	2e-34	0.0053	NA	NA	NA	385	390	256	no	no	yes	NA	NA
Hordeum vulgare	HORVU1Hr1G011720.9	CNL	partial	HORVU1Hr1G011720.9:15	HORVU1Hr1G011720.9:545	RQIDEASRVISVWGIAGVGKSALVRSAYRKYLQNRSSLAGLGMSFIHGWVNVLHPFNLREFCRSLLLNLSSEPAEIKKEADAELANMTNPVDVCRRLLSDDQQQNQCLIVIDDLQSTKEWDRIKQALSFGEGCCVIIVTNDSSVARYCSGQDQQLMFNVKGLGNVHALDLFNTVCMTACVTTSRGMR	no	17,16,6,4,5,1,4,5	NA	1.6e-32	NA	NA	NA	NA	NA	NA	NA	NA	NA	NA	NA	NA
Hordeum vulgare	HORVU1Hr1G012180.1	CNL	partial	HORVU1Hr1G012180.1:10	HORVU1Hr1G012180.1:253	DASEKRLKKVSIVGFGGLGKTTLARAVDEKIKGDFDCRAFVPVGQNTDMKKVLRDILIDLGNPHSDLVILDVNQLIKKLHEFLENKRYLIIIDDIYM	no	17,16,14,1,6	NA	6.5e-19	NA	NA	NA	NA	NA	NA	NA	NA	NA	NA	NA	NA
Hordeum vulgare	HORVU1Hr1G012190.1	CNL	complete	HORVU1Hr1G012190.1:10	HORVU1Hr1G012190.1:788	DASNKRLKKVSIVGFGGLGKTTLARAVYEKIKGDFNCRAFVPIGQNPDMKKVLRDILIDLGNPHSDLAMLDANQLIKKLHEFLENKRYLVIIDDIWDEKLWEGINFAFSNRNNLGSRLITTTRIVSVSNSCCSSDGDSVYQMEPLSVDDSRMLFYKRIFPDENGCVNEFEQVSRDILKKCGGVPLAIITIASALAGDQKMKPKCEWDILLQ	no	17,16,14,1,6,4,5,10,3,12,2,8,7,11,9,11,20	yes	1.5e-44	5.3e-05	NA	0.075	NA	170	381	264	no	no	yes	NA	NA
Hordeum vulgare	HORVU1Hr1G012190.2	CNL	complete	HORVU1Hr1G012190.2:10	HORVU1Hr1G012190.2:645	DASNKRLKKVSIVGFGGLGKTTLARAVYEKIKGDFNCRAFVPIGQNPDMKKVLRDILIDLGNPHSDLAMLDANQLIKKLHEFLENKRYLVIIDDIWDEKLWEGINFAFSNRNNLGSRLITTTRIVSVSNSCCSSDGDSVYQMEPLSVDDSRMLFYKRIFPDENGCVNEFEQVSRDILKKCGGVPLAIITIASALAGDQKMKPKCEWDILLQ	no	17,16,14,1,6,4,5,10,3,12,2,8,7,11,9,11	NA	9.3e-45	8e-06	NA	0.0029	NA	NA	NA	NA	NA	NA	NA	NA	NA
Hordeum vulgare	HORVU1Hr1G020240.1	CNL	partial	HORVU1Hr1G020240.1:51	HORVU1Hr1G020240.1:1064	NA	no	3,12,2,8,7,9,11,11,11,15,11,11,11,11,11	yes	4.5e-10	NA	NA	NA	NA	NA	NA	NA	NA	NA	NA	NA	NA
Hordeum vulgare	HORVU1Hr1G020240.10	CNL	partial	HORVU1Hr1G020240.10:51	HORVU1Hr1G020240.10:1064	NA	no	3,12,2,8,7,9,11,11,11,15,11,11,11,11,11	yes	4.5e-10	NA	NA	NA	NA	NA	NA	NA	NA	NA	NA	NA	NA
Hordeum vulgare	HORVU1Hr1G020240.11	CNL	partial	HORVU1Hr1G020240.11:51	HORVU1Hr1G020240.11:1064	NA	no	3,12,2,8,7,9,11,11,11,15,11,11,11,11,11	yes	4.5e-10	NA	NA	NA	NA	NA	NA	NA	NA	NA	NA	NA	NA
Hordeum vulgare	HORVU1Hr1G020240.12	NA	partial	HORVU1Hr1G020240.12:6	HORVU1Hr1G020240.12:895	NA	no	7,9,11,11,11,15,11,11,11,11,11	yes	NA	NA	NA	0.98	NA	NA	NA	NA	NA	NA	NA	NA	NA
Hordeum vulgare	HORVU1Hr1G020240.2	CNL	partial	HORVU1Hr1G020240.2:51	HORVU1Hr1G020240.2:1064	NA	no	3,12,2,8,7,9,11,11,11,15,11,11,11,11,11	yes	4.5e-10	NA	NA	NA	NA	NA	NA	NA	NA	NA	NA	NA	NA
Hordeum vulgare	HORVU1Hr1G020240.3	CNL	partial	HORVU1Hr1G020240.3:51	HORVU1Hr1G020240.3:1064	NA	no	3,12,2,8,7,9,11,11,11,15,11,11,11,11,11	yes	4.5e-10	NA	NA	NA	NA	NA	NA	NA	NA	NA	NA	NA	NA
Hordeum vulgare	HORVU1Hr1G020240.4	CNL	partial	HORVU1Hr1G020240.4:51	HORVU1Hr1G020240.4:1064	NA	no	3,12,2,8,7,9,11,11,11,15,11,11,11,11,11	yes	4.5e-10	NA	NA	NA	NA	NA	NA	NA	NA	NA	NA	NA	NA
Hordeum vulgare	HORVU1Hr1G020240.5	CNL	partial	HORVU1Hr1G020240.5:51	HORVU1Hr1G020240.5:1064	NA	no	3,12,2,8,7,9,11,11,11,15,11,11,11,11,11	yes	4.5e-10	NA	NA	NA	NA	NA	NA	NA	NA	NA	NA	NA	NA
Hordeum vulgare	HORVU1Hr1G020240.6	CNL	partial	HORVU1Hr1G020240.6:51	HORVU1Hr1G020240.6:1064	NA	no	3,12,2,8,7,9,11,11,11,15,11,11,11,11,11	yes	4.5e-10	NA	NA	NA	NA	NA	NA	NA	NA	NA	NA	NA	NA
Hordeum vulgare	HORVU1Hr1G020240.7	CNL	partial	HORVU1Hr1G020240.7:51	HORVU1Hr1G020240.7:1064	NA	no	3,12,2,8,7,9,11,11,11,15,11,11,11,11,11	yes	4.5e-10	NA	NA	NA	NA	NA	NA	NA	NA	NA	NA	NA	NA
Hordeum vulgare	HORVU1Hr1G020240.8	CNL	partial	HORVU1Hr1G020240.8:51	HORVU1Hr1G020240.8:1064	NA	no	3,12,2,8,7,9,11,11,11,15,11,11,11,11,11	yes	4.5e-10	NA	NA	NA	NA	NA	NA	NA	NA	NA	NA	NA	NA
Hordeum vulgare	HORVU1Hr1G021390.12	CNL	complete	HORVU1Hr1G021390.12:12	HORVU1Hr1G021390.12:1474	EYIHEKLTVIPIVGPGGIGKTTLTQYIYNNKEVQDHFKVRVWICVSLDFSVHKLTQEIVSSIPKAEDEKEKADSEVHNLDQLQKLIEKRLKNKRFLFVLDDIWKYGNEDEWKRFLIPFHKEQGNGDTILVTTRFLEVAEMVKQRDKPVHLEGLEPKEYWTLFLACVFGETNQRNNDDDLIEIGKKIVEKLKGSPLAAKTVGRLLRNNISVD	no	16,1,6,4,5,3,12,2,8,7,19,11,11,11,11,11,11,11	yes	3.8e-50	NA	NA	NA	NA	198	398	891	no	no	NA	NA	NA
Hordeum vulgare	HORVU1Hr1G021390.14	CNL	partial	HORVU1Hr1G021390.14:202	HORVU1Hr1G021390.14:1452	EYIHEKLTVIPIVGPGGIGKTTLTQYIYNNKEVQDHFKVRVWICVSLDFSVHKLTQEIVSSIPKAEDEKEKADSEVHNLDQLQKLIEKRLKNKRFLFVLDDIWKYGNEDEWKRFLIPFHKEQGNGDTILVTTRFLEVAEMVKQRDKPVHLEGLEPKEYWTLFLACVFGETNQRNNDDDLIEIGKKIVEKLKGSPLAAKTVGRLLRNNISVD	no	1,6,4,5,3,12,2,8,7,19,11,11,11,11,11,11,11	yes	3.8e-50	NA	NA	NA	NA	NA	NA	NA	NA	NA	NA	NA	NA
Hordeum vulgare	HORVU1Hr1G021390.17	CNL	complete	HORVU1Hr1G021390.17:8	HORVU1Hr1G021390.17:1470	EYIHEKLTVIPIVGPGGIGKTTLTQYIYNNKEVQDHFKVRVWICVSLDFSVHKLTQEIVSSIPKAEDEKEKADSEVHNLDQLQKLIEKRLKNKRFLFVLDDIWKYGNEDEWKRFLIPFHKEQGNGDTILVTTRFLEVAEMVKQRDKPVHLEGLEPKEYWTLFLACVFGETNQRNNDDDLIEIGKKIVEKLKGSPLAAKTVGRLLRNNISVD	no	16,1,6,4,5,3,12,2,8,7,19,11,11,11,11,11,11,11	yes	3.8e-50	NA	NA	NA	NA	194	398	891	no	no	NA	NA	NA
Hordeum vulgare	HORVU1Hr1G021390.18	CNL	complete	HORVU1Hr1G021390.18:15	HORVU1Hr1G021390.18:1536	EYIHEKLTVIPIVGPGGIGKTTLTQYIYNNKEVQDHFKVRVWICVSLDFSVHKLTQEIVSSIPKAEDEKEKADSEVHNLDQLQKLIEKRLKNKRFLFVLDDIWKYGNEDEWKRFLIPFHKEQGNGDTILVTTRFLEVAEMVKQRDKPVHLEGLEPKEYWTLFLACVFGETNQRNNDDDLIEIGKKIVEKLKGSPLAAKTVGRLLRNNISVD	no	17,16,1,6,4,5,3,12,2,8,7,19,11,11,11,11,11,11,11	yes	4.2e-50	NA	NA	NA	NA	260	398	891	no	no	NA	NA	NA
Hordeum vulgare	HORVU1Hr1G021390.2	CNL	complete	HORVU1Hr1G021390.2:15	HORVU1Hr1G021390.2:1536	EYIHEKLTVIPIVGPGGIGKTTLTQYIYNNKEVQDHFKVRVWICVSLDFSVHKLTQEIVSSIPKAEDEKEKADSEVHNLDQLQKLIEKRLKNKRFLFVLDDIWKYGNEDEWKRFLIPFHKEQGNGDTILVTTRFLEVAEMVKQRDKPVHLEGLEPKEYWTLFLACVFGETNQRNNDDDLIEIGKKIVEKLKGSPLAAKTVGRLLRNNISVD	no	17,16,1,6,4,5,3,12,2,8,7,19,11,11,11,11,11,11,11	yes	4.2e-50	NA	NA	NA	NA	260	398	891	no	no	NA	NA	NA
Hordeum vulgare	HORVU1Hr1G021390.20	CNL	complete	HORVU1Hr1G021390.20:15	HORVU1Hr1G021390.20:1536	EYIHEKLTVIPIVGPGGIGKTTLTQYIYNNKEVQDHFKVRVWICVSLDFSVHKLTQEIVSSIPKAEDEKEKADSEVHNLDQLQKLIEKRLKNKRFLFVLDDIWKYGNEDEWKRFLIPFHKEQGNGDTILVTTRFLEVAEMVKQRDKPVHLEGLEPKEYWTLFLACVFGETNQRNNDDDLIEIGKKIVEKLKGSPLAAKTVGRLLRNNISVD	no	17,16,1,6,4,5,3,12,2,8,7,19,11,11,11,11,11,11,11	yes	4.2e-50	NA	NA	NA	NA	260	398	891	no	no	NA	NA	NA
Hordeum vulgare	HORVU1Hr1G021390.21	CNL	complete	HORVU1Hr1G021390.21:15	HORVU1Hr1G021390.21:1536	EYIHEKLTVIPIVGPGGIGKTTLTQYIYNNKEVQDHFKVRVWICVSLDFSVHKLTQEIVSSIPKAEDEKEKADSEVHNLDQLQKLIEKRLKNKRFLFVLDDIWKYGNEDEWKRFLIPFHKEQGNGDTILVTTRFLEVAEMVKQRDKPVHLEGLEPKEYWTLFLACVFGETNQRNNDDDLIEIGKKIVEKLKGSPLAAKTVGRLLRNNISVD	no	17,16,1,6,4,5,3,12,2,8,7,19,11,11,11,11,11,11,11	yes	4.2e-50	NA	NA	NA	NA	260	398	891	no	no	NA	NA	NA
Hordeum vulgare	HORVU1Hr1G021390.22	CNL	complete	HORVU1Hr1G021390.22:15	HORVU1Hr1G021390.22:1536	EYIHEKLTVIPIVGPGGIGKTTLTQYIYNNKEVQDHFKVRVWICVSLDFSVHKLTQEIVSSIPKAEDEKEKADSEVHNLDQLQKLIEKRLKNKRFLFVLDDIWKYGNEDEWKRFLIPFHKEQGNGDTILVTTRFLEVAEMVKQRDKPVHLEGLEPKEYWTLFLACVFGETNQRNNDDDLIEIGKKIVEKLKGSPLAAKTVGRLLRNNISVD	no	17,16,1,6,4,5,3,12,2,8,7,19,11,11,11,11,11,11,11	yes	4.2e-50	NA	NA	NA	NA	260	398	891	no	no	NA	NA	NA
Hordeum vulgare	HORVU1Hr1G021390.23	CNL	complete	HORVU1Hr1G021390.23:15	HORVU1Hr1G021390.23:1536	EYIHEKLTVIPIVGPGGIGKTTLTQYIYNNKEVQDHFKVRVWICVSLDFSVHKLTQEIVSSIPKAEDEKEKADSEVHNLDQLQKLIEKRLKNKRFLFVLDDIWKYGNEDEWKRFLIPFHKEQGNGDTILVTTRFLEVAEMVKQRDKPVHLEGLEPKEYWTLFLACVFGETNQRNNDDDLIEIGKKIVEKLKGSPLAAKTVGRLLRNNISVD	no	17,16,1,6,4,5,3,12,2,8,7,19,11,11,11,11,11,11,11	yes	4.2e-50	NA	NA	NA	NA	260	398	891	no	no	yes	NA	NA
Hordeum vulgare	HORVU1Hr1G021390.24	CNL	complete	HORVU1Hr1G021390.24:15	HORVU1Hr1G021390.24:1116	EYIHEKLTVIPIVGPGGIGKTTLTQYIYNNKEVQDHFKVRVWICVSLDFSVHKLTQEIVSSIPKAEDEKEKADSEVHNLDQLQKLIEKRLKNKRFLFVLDDIWKYGNEDEWKRFLIPFHKEQGNGDTILVTTRFLEVAEMVKQRDKPVHLEGLEPKEYWTLFLACVFGETNQRNNDDDLIEIGKKIVEKLKGSPLAAKTVGRLLRNNISVD	no	17,16,1,6,4,5,3,12,2,8,7,19,11,11,11,11	yes	3.2e-50	NA	NA	NA	NA	260	398	763	no	no	NA	NA	NA
Hordeum vulgare	HORVU1Hr1G021390.3	CNL	complete	HORVU1Hr1G021390.3:15	HORVU1Hr1G021390.3:1536	EYIHEKLTVIPIVGPGGIGKTTLTQYIYNNKEVQDHFKVRVWICVSLDFSVHKLTQEIVSSIPKAEDEKEKADSEVHNLDQLQKLIEKRLKNKRFLFVLDDIWKYGNEDEWKRFLIPFHKEQGNGDTILVTTRFLEVAEMVKQRDKPVHLEGLEPKEYWTLFLACVFGETNQRNNDDDLIEIGKKIVEKLKGSPLAAKTVGRLLRNNISVD	no	17,16,1,6,4,5,3,12,2,8,7,19,11,11,11,11,11,11,11	yes	4.2e-50	NA	NA	NA	NA	260	398	891	no	no	NA	NA	NA
Hordeum vulgare	HORVU1Hr1G021390.5	CNL	complete	HORVU1Hr1G021390.5:15	HORVU1Hr1G021390.5:1536	EYIHEKLTVIPIVGPGGIGKTTLTQYIYNNKEVQDHFKVRVWICVSLDFSVHKLTQEIVSSIPKAEDEKEKADSEVHNLDQLQKLIEKRLKNKRFLFVLDDIWKYGNEDEWKRFLIPFHKEQGNGDTILVTTRFLEVAEMVKQRDKPVHLEGLEPKEYWTLFLACVFGETNQRNNDDDLIEIGKKIVEKLKGSPLAAKTVGRLLRNNISVD	no	17,16,1,6,4,5,3,12,2,8,7,19,11,11,11,11,11,11,11	yes	4.2e-50	NA	NA	NA	NA	260	398	891	no	no	NA	NA	NA
Hordeum vulgare	HORVU1Hr1G021390.6	CNL	complete	HORVU1Hr1G021390.6:15	HORVU1Hr1G021390.6:1536	EYIHEKLTVIPIVGPGGIGKTTLTQYIYNNKEVQDHFKVRVWICVSLDFSVHKLTQEIVSSIPKAEDEKEKADSEVHNLDQLQKLIEKRLKNKRFLFVLDDIWKYGNEDEWKRFLIPFHKEQGNGDTILVTTRFLEVAEMVKQRDKPVHLEGLEPKEYWTLFLACVFGETNQRNNDDDLIEIGKKIVEKLKGSPLAAKTVGRLLRNNISVD	no	17,16,1,6,4,5,3,12,2,8,7,19,11,11,11,11,11,11,11	yes	4.2e-50	NA	NA	NA	NA	260	398	891	no	no	NA	NA	NA
Hordeum vulgare	HORVU1Hr1G021390.9	CNL	complete	HORVU1Hr1G021390.9:15	HORVU1Hr1G021390.9:1536	EYIHEKLTVIPIVGPGGIGKTTLTQYIYNNKEVQDHFKVRVWICVSLDFSVHKLTQEIVSSIPKAEDEKEKADSEVHNLDQLQKLIEKRLKNKRFLFVLDDIWKYGNEDEWKRFLIPFHKEQGNGDTILVTTRFLEVAEMVKQRDKPVHLEGLEPKEYWTLFLACVFGETNQRNNDDDLIEIGKKIVEKLKGSPLAAKTVGRLLRNNISVD	no	17,16,1,6,4,5,3,12,2,8,7,19,11,11,11,11,11,11,11	yes	4.2e-50	NA	NA	NA	NA	260	398	891	no	no	NA	NA	NA
Hordeum vulgare	HORVU1Hr1G040540.1	CNL	partial	HORVU1Hr1G040540.1:117	HORVU1Hr1G040540.1:858	TARPAACEVVAIVGPDGVGKTKLARMVYESARVRCSFGSTSWVRLSRGYTDAGLLSQVIDAFGGDTKGGESVADLQAMLTCLVANKRFLLVVDDVWYGGVWEDVLQNPLERGGSGGKVLVTARRGTTAREMGASLVHRVKRLSADDGWLLLRTSACVAADERQLKGVGERLVDKCGCIPLAIKAVAGVLRTREASTDEWGEVLASPAWSVQ	no	1,6,4,5,10,3,12,2,8,7,9,9,11,9,19,11,11,11,11,11	yes	9.7e-35	2.8e-07	NA	NA	NA	91	365	608	no	no	yes	NA	NA
Hordeum vulgare	HORVU1Hr1G040540.12	CNL	partial	HORVU1Hr1G040540.12:64	HORVU1Hr1G040540.12:805	TARPAACEVVAIVGPDGVGKTKLARMVYESARVRCSFGSTSWVRLSRGYTDAGLLSQVIDAFGGDTKGGESVADLQAMLTCLVANKRFLLVVDDVWYGGVWEDVLQNPLERGGSGGKVLVTARRGTTAREMGASLVHRVKRLSADDGWLLLRTSACVAADERQLKGVGERLVDKCGCIPLAIKAVAGVLRTREASTDEWGEVLASPAWSVQ	no	1,6,4,5,10,3,12,2,8,7,9,9,11,9,19,11,11,11,11,11	yes	1.7e-34	3.2e-06	NA	NA	NA	38	365	1073	TRUE	no	NA	NA	NA
Hordeum vulgare	HORVU1Hr1G040540.13	CNL	partial	HORVU1Hr1G040540.13:26	HORVU1Hr1G040540.13:561	NA	no	12,2,8,7,9,9,11,9,19,11,11,11,11,11	yes	NA	6.3e-08	NA	NA	NA	NA	NA	NA	NA	NA	NA	NA	NA
Hordeum vulgare	HORVU1Hr1G040540.15	CNL	partial	HORVU1Hr1G040540.15:26	HORVU1Hr1G040540.15:561	NA	no	12,2,8,7,9,9,11,9,19,11,11,11,11,11	NA	NA	2.9e-08	NA	NA	NA	NA	NA	NA	NA	NA	NA	NA	NA
Hordeum vulgare	HORVU1Hr1G040540.16	CNL	partial	HORVU1Hr1G040540.16:64	HORVU1Hr1G040540.16:805	TARPAACEVVAIVGPDGVGKTKLARMVYESARVRCSFGSTSWVRLSRGYTDAGLLSQVIDAFGGDTKGGESVADLQAMLTCLVANKRFLLVVDDVWYGGVWEDVLQNPLERGGSGGKVLVTARRGTTAREMGASLVHRVKRLSADDGWLLLRTSACVAADERQLKGVGERLVDKCGCIPLAIKAVAGVLRTREASTDEWGEVLASPAWSVQ	no	1,6,4,5,10,3,12,2,8,7,9,9,11,9,19,11,11,11,11,11	yes	1.6e-34	3e-06	NA	NA	NA	38	365	1059	TRUE	no	NA	NA	NA
Hordeum vulgare	HORVU1Hr1G040540.17	CNL	partial	HORVU1Hr1G040540.17:3	HORVU1Hr1G040540.17:538	NA	no	12,2,8,7,9,9,11,9,19,11,11,11,11,11	NA	NA	2.5e-08	NA	NA	NA	NA	NA	NA	NA	NA	NA	NA	NA
Hordeum vulgare	HORVU1Hr1G040540.18	CNL	partial	HORVU1Hr1G040540.18:116	HORVU1Hr1G040540.18:857	TARPAACEVVAIVGPDGVGKTKLARMVYESARVRCSFGSTSWVRLSRGYTDAGLLSQVIDAFGGDTKGGESVADLQAMLTCLVANKRFLLVVDDVWYGGVWEDVLQNPLERGGSGGKVLVTARRGTTAREMGASLVHRVKRLSADDGWLLLRTSACVAADERQLKGVGERLVDKCGCIPLAIKAVAGVLRTREASTDEWGEVLASPAWSVQ	no	1,6,4,5,10,3,12,2,8,7,9,9,11,9,19,11,11,11,11,11	yes	1.7e-34	3.6e-06	NA	NA	NA	90	365	1056	no	no	NA	NA	NA
Hordeum vulgare	HORVU1Hr1G040540.19	CNL	partial	HORVU1Hr1G040540.19:64	HORVU1Hr1G040540.19:805	TARPAACEVVAIVGPDGVGKTKLARMVYESARVRCSFGSTSWVRLSRGYTDAGLLSQVIDAFGGDTKGGESVADLQAMLTCLVANKRFLLVVDDVWYGGVWEDVLQNPLERGGSGGKVLVTARRGTTAREMGASLVHRVKRLSADDGWLLLRTSACVAADERQLKGVGERLVDKCGCIPLAIKAVAGVLRTREASTDEWGEVLASPAWSVQ	no	1,6,4,5,10,3,12,2,8,7,9,9,11,9,19,11,11,11,11,11	yes	1.7e-34	3.3e-06	NA	NA	NA	38	365	1081	TRUE	no	NA	NA	NA
Hordeum vulgare	HORVU1Hr1G040540.2	CNL	partial	HORVU1Hr1G040540.2:64	HORVU1Hr1G040540.2:805	TARPAACEVVAIVGPDGVGKTKLARMVYESARVRCSFGSTSWVRLSRGYTDAGLLSQVIDAFGGDTKGGESVADLQAMLTCLVANKRFLLVVDDVWYGGVWEDVLQNPLERGGSGGKVLVTARRGTTAREMGASLVHRVKRLSADDGWLLLRTSACVAADERQLKGVGERLVDKCGCIPLAIKAVAGVLRTREASTDEWGEVLASPAWSVQ	no	1,6,4,5,10,3,12,2,8,7,9,9,11,9,19,11,11,11,11,11	yes	1.4e-34	1.4e-06	NA	NA	NA	38	365	903	TRUE	no	NA	NA	NA
Hordeum vulgare	HORVU1Hr1G040540.20	CNL	partial	HORVU1Hr1G040540.20:64	HORVU1Hr1G040540.20:805	TARPAACEVVAIVGPDGVGKTKLARMVYESARVRCSFGSTSWVRLSRGYTDAGLLSQVIDAFGGDTKGGESVADLQAMLTCLVANKRFLLVVDDVWYGGVWEDVLQNPLERGGSGGKVLVTARRGTTAREMGASLVHRVKRLSADDGWLLLRTSACVAADERQLKGVGERLVDKCGCIPLAIKAVAGVLRTREASTDEWGEVLASPAWSVQ	no	1,6,4,5,10,3,12,2,8,7,9,9,11,9,19,11,11,11,11,11	yes	1.5e-34	2.1e-06	NA	NA	NA	38	365	982	TRUE	no	NA	NA	NA
Hordeum vulgare	HORVU1Hr1G040540.21	CNL	partial	HORVU1Hr1G040540.21:64	HORVU1Hr1G040540.21:805	TARPAACEVVAIVGPDGVGKTKLARMVYESARVRCSFGSTSWVRLSRGYTDAGLLSQVIDAFGGDTKGGESVADLQAMLTCLVANKRFLLVVDDVWYGGVWEDVLQNPLERGGSGGKVLVTARRGTTAREMGASLVHRVKRLSADDGWLLLRTSACVAADERQLKGVGERLVDKCGCIPLAIKAVAGVLRTREASTDEWGEVLASPAWSVQ	no	1,6,4,5,10,3,12,2,8,7,9,9,11,9,19,11,11,11,11,11	yes	1.6e-34	2.9e-06	NA	NA	NA	38	365	1056	TRUE	no	NA	NA	NA
Hordeum vulgare	HORVU1Hr1G040540.22	CNL	partial	HORVU1Hr1G040540.22:64	HORVU1Hr1G040540.22:805	TARPAACEVVAIVGPDGVGKTKLARMVYESARVRCSFGSTSWVRLSRGYTDAGLLSQVIDAFGGDTKGGESVADLQAMLTCLVANKRFLLVVDDVWYGGVWEDVLQNPLERGGSGGKVLVTARRGTTAREMGASLVHRVKRLSADDGWLLLRTSACVAADERQLKGVGERLVDKCGCIPLAIKAVAGVLRTREASTDEWGEVLASPAWSVQ	no	1,6,4,5,10,3,12,2,8,7,9,9,11,9,19,11,11,11,11,11	yes	1.6e-34	3e-06	NA	NA	NA	38	365	1060	TRUE	no	NA	NA	NA
Hordeum vulgare	HORVU1Hr1G040540.24	CNL	partial	HORVU1Hr1G040540.24:22	HORVU1Hr1G040540.24:738	NA	no	6,4,5,10,3,12,2,8,7,9,9,11,9,19,11,11,11,11,11	yes	4.6e-31	1.7e-07	NA	NA	NA	0	336	662	TRUE	no	NA	NA	NA
Hordeum vulgare	HORVU1Hr1G040540.3	CNL	partial	HORVU1Hr1G040540.3:64	HORVU1Hr1G040540.3:741	TARPAACEVVAIVGPDGVGKTKLARMVYESARVRCSFGSTSWVRLSRGYTDAGLLSQVIDAFGGDTKGGESVADLQAMLTCLVANKRFLLVVDDVWYGGVWEDVLQNPLERGGSGGKVLVTARRGTTAREMGASLVHRVKRLSADDGWLLLRTSACVAADERQLKGVGERLVDKCGCIPLAIKAVAGVLRTREASTDEWGEVLASPAWSVQ	no	1,6,4,5,10,3,12,2,8,7,9,9,11,9,19,11,11,11	yes	6.1e-35	4.3e-06	NA	NA	NA	38	365	350	TRUE	no	NA	NA	NA
Hordeum vulgare	HORVU1Hr1G040540.4	CNL	partial	HORVU1Hr1G040540.4:64	HORVU1Hr1G040540.4:805	TARPAACEVVAIVGPDGVGKTKLARMVYESARVRCSFGSTSWVRLSRGYTDAGLLSQVIDAFGGDTKGGESVADLQAMLTCLVANKRFLLVVDDVWYGGVWEDVLQNPLERGGSGGKVLVTARRGTTAREMGASLVHRVKRLSADDGWLLLRTSACVAADERQLKGVGERLVDKCGCIPLAIKAVAGVLRTREASTDEWGEVLASPAWSVQ	no	1,6,4,5,10,3,12,2,8,7,9,9,11,9,19,11,11,11,11,11	yes	1.2e-34	1.1e-06	NA	NA	NA	38	365	850	TRUE	no	NA	NA	NA
Hordeum vulgare	HORVU1Hr1G040540.5	CNL	partial	HORVU1Hr1G040540.5:118	HORVU1Hr1G040540.5:795	TARPAACEVVAIVGPDGVGKTKLARMVYESARVRCSFGSTSWVRLSRGYTDAGLLSQVIDAFGGDTKGGESVADLQAMLTCLVANKRFLLVVDDVWYGGVWEDVLQNPLERGGSGGKVLVTARRGTTAREMGASLVHRVKRLSADDGWLLLRTSACVAADERQLKGVGERLVDKCGCIPLAIKAVAGVLRTREASTDEWGEVLASPAWSVQ	no	1,6,4,5,10,3,12,2,8,7,9,9,11,9,19,11,11,11	yes	6.5e-35	6.7e-06	NA	NA	NA	92	365	350	no	no	NA	NA	NA
Hordeum vulgare	HORVU1Hr1G040540.6	CNL	partial	HORVU1Hr1G040540.6:64	HORVU1Hr1G040540.6:805	TARPAACEVVAIVGPDGVGKTKLARMVYESARVRCSFGSTSWVRLSRGYTDAGLLSQVIDAFGGDTKGGESVADLQAMLTCLVANKRFLLVVDDVWYGGVWEDVLQNPLERGGSGGKVLVTARRGTTAREMGASLVHRVKRLSADDGWLLLRTSACVAADERQLKGVGERLVDKCGCIPLAIKAVAGVLRTREASTDEWGEVLASPAWSVQ	no	1,6,4,5,10,3,12,2,8,7,9,9,11,9,19,11,11,11,11,11	yes	1.7e-34	3.2e-06	NA	NA	NA	38	365	1073	TRUE	no	NA	NA	NA
Hordeum vulgare	HORVU1Hr1G040540.7	NA	partial	HORVU1Hr1G040540.7:14	HORVU1Hr1G040540.7:495	NA	no	8,7,9,9,11,9,19,11,11,11,11,11	yes	NA	6.1e-07	NA	NA	NA	NA	NA	NA	NA	NA	NA	NA	NA
Hordeum vulgare	HORVU1Hr1G040540.8	CNL	partial	HORVU1Hr1G040540.8:106	HORVU1Hr1G040540.8:847	TARPAACEVVAIVGPDGVGKTKLARMVYESARVRCSFGSTSWVRLSRGYTDAGLLSQVIDAFGGDTKGGESVADLQAMLTCLVANKRFLLVVDDVWYGGVWEDVLQNPLERGGSGGKVLVTARRGTTAREMGASLVHRVKRLSADDGWLLLRTSACVAADERQLKGVGERLVDKCGCIPLAIKAVAGVLRTREASTDEWGEVLASPAWSVQ	no	1,6,4,5,10,3,12,2,8,7,9,9,11,9,19,11,11,11,11,11	yes	1.7e-34	3.5e-06	NA	NA	NA	80	365	1056	no	no	NA	NA	NA
Hordeum vulgare	HORVU1Hr1G040540.9	CNL	partial	HORVU1Hr1G040540.9:64	HORVU1Hr1G040540.9:805	TARPAACEVVAIVGPDGVGKTKLARMVYESARVRCSFGSTSWVRLSRGYTDAGLLSQVIDAFGGDTKGGESVADLQAMLTCLVANKRFLLVVDDVWYGGVWEDVLQNPLERGGSGGKVLVTARRGTTAREMGASLVHRVKRLSADDGWLLLRTSACVAADERQLKGVGERLVDKCGCIPLAIKAVAGVLRTREASTDEWGEVLASPAWSVQ	no	1,6,4,5,10,3,12,2,8,7,9,9,11,9,19,11,11,11,11,11	yes	1.6e-34	2.9e-06	NA	NA	NA	38	365	1056	TRUE	no	NA	NA	NA
Hordeum vulgare	HORVU1Hr1G044790.1	CNL	partial	HORVU1Hr1G044790.1:13	HORVU1Hr1G044790.1:338	NA	no	10,3,12,2,8,7,11,9,9	NA	NA	5.1e-07	NA	0.6	NA	NA	NA	NA	NA	NA	NA	NA	NA
Hordeum vulgare	HORVU1Hr1G061260.1	CNL	partial	HORVU1Hr1G061260.1:9	HORVU1Hr1G061260.1:1045	TDSTPGLSILPITGMAGIGKTTLAQLVFWHPWVVDTFGDDRIWVSVPRNFNIMVIMSRIAQVLTAQQCSILDSSEIEMIEQDSVKLKCLVKKKLSGRKLFLVLDDAWDQDLQKWQELVEVLDSAEKPGSKMIVTSRIPDVVKVTNSLKPYTVQRLLPAHSSRLLTQWMQNPADLPPRLIPIRKMIAETCAGVPSLLLSASNKLKSIRKTQV	no	17,1,6,4,5,2,7,9,9,9,11,11,11,11,11,11,9	yes	3e-29	1.5e-13	NA	0.099	NA	161	374	520	no	no	NA	NA	NA
Hordeum vulgare	HORVU1Hr1G061260.2	CNL	partial	HORVU1Hr1G061260.2:105	HORVU1Hr1G061260.2:948	TDSTPGLSILPITGMAGIGKTTLAQLVFWHPWVVDTFGDDRIWVSVPRNFNIMVIMSRIAQVLTAQQCIKCLVKKKLSGRKLFLVLDDAWDQDLQKWQELVEVLDSAEKPGSKMIVTSRIPDVVKVTNSLKPYTVQRLLPAHSSRLLTQWMQNPADLPPRLIPIRKMIAETCAGVPSLLLSASNKLKSIRKTQVAWQHVLSRFDLVFYADR	no	1,6,4,5,2,7,9,9,9,11,11,11,11,11,11,9	yes	1.5e-26	1.3e-15	NA	0.29	NA	81	357	520	no	no	yes	NA	NA
Hordeum vulgare	HORVU1Hr1G061260.3	CNL	partial	HORVU1Hr1G061260.3:155	HORVU1Hr1G061260.3:680	TDSTPGLSILPITGMAGIGKTTLAQLVFWHPWVVDTFGDDRIWVSVPRNFNIMVIMSRIAQVLTAQQCSILDSSEIEMIEQDSVKLKCLVKKKLSGRKLFLVLDDAWDQDLQKWQELVEVLDSAEKPGSKMIVTSRIPDVVKVTNSLKPYTVQRLLPAHSSRLLTQWMQNPADLPPRLIPIRKMIAETCAGVPSLLLSASNKLKSIRKTQV	no	1,6,4,5,2,7,9,9,9,11,11,11	yes	2.1e-29	1e-15	NA	0.016	NA	131	374	315	no	no	yes	NA	NA
Hordeum vulgare	HORVU1Hr1G064770.1	CNL	complete	HORVU1Hr1G064770.1:81	HORVU1Hr1G064770.1:1071	DPRAAAIPVAAIIGLGGMGKTALARVLLHDDSVKATFDLVMWVCPAAAYHKVGLVKQILQSAGVGFPDGMNNFDWLQRQLKDAVSSKRFLLVLDNVWNKGGMDEDKWSEVLAPLRCGKPGSKIMVTTRKKIVATLLNARKKVTLDGLAFDDIWSLFTRIAFSNDSADKDSVLQAIGQRLVHKLKGLPLAAKVVGGMLKGSRSSSYWNKISE	no	16,1,6,4,5,10,3,12,2,8,7,9,9,11,11,11,11,11,11,11,11	yes	7.1e-35	0.049	NA	NA	NA	176	373	564	no	no	yes	NA	NA
Hordeum vulgare	HORVU1Hr1G064770.2	CNL	complete	HORVU1Hr1G064770.2:81	HORVU1Hr1G064770.2:1071	DPRAAAIPVAAIIGLGGMGKTALARVLLHDDSVKATFDLVMWVCPAAAYHKVGLVKQILQSAGVGFPDGMNNFDWLQRQLKDAVSSKRFLLVLDNVWNKGGMDEDKWSEVLAPLRCGKPGSKIMVTTRKKIVATLLNARKKVTLDGLAFDDIWSLFTRIAFSNDSADKDSVLQAIGQRLVHKLKGLPLAAKVVGGMLKGSRSSSYWNKISE	no	16,1,6,4,5,10,3,12,2,8,7,9,9,11,11,11,11,11,11,11,11	yes	7.1e-35	0.049	NA	NA	NA	176	373	564	no	no	yes	NA	NA
Hordeum vulgare	HORVU1Hr1G064770.3	CNL	complete	HORVU1Hr1G064770.3:14	HORVU1Hr1G064770.3:972	DPRAAAIPVAAIIGLGGMGKTALARVLLHDDSVKATFDLVMWVCPAAAYHKVGLVKQILQSAGVGFPDGMNNFDWLQRQLKDAVSSKRFLLVLDNVWNKGGMDEDKWSEVLAPLRCGKPGSKIMVTTRKKIVATLLNARKKAIGQRLVHKLKGLPLAAKVVGGMLKGSRSSSYWNKISEMESYANVTATLGLCYRNLQEHLQPCFAICSIF	no	16,1,6,4,5,3,12,2,8,7,9,9,11,11,11,11,11,11,11,11	yes	3.2e-25	0.034	NA	NA	NA	109	341	564	no	no	NA	NA	NA
Hordeum vulgare	HORVU1Hr1G068200.1	CNL	complete	HORVU1Hr1G068200.1:14	HORVU1Hr1G068200.1:938	NSNQSNLSILPIVGMGGLGKTTLTQLVYNDTRIKEHFQLRVWLCVSENFDQMKLTKETIESVASEFESVISGVSSVTTNMNLLQEDLSKKLKGKRFLLVLDDVWNEDPEKWDTYRRALLTGGKGSRIVVTTRNKNVGKLMGGMTPYYLNQLSDNDCWFLFRSYAFVDGNSDAHPNLEMIGKEIVKKLKGLPLAAKAIGSLLCSQDTEDDWK	no	17,16,1,6,4,5,10,3,12,2,8,7,9,9,11,11,11,11,11,11,11	yes	4.7e-49	7e-08	NA	NA	NA	175	375	468	no	no	NA	NA	NA
Hordeum vulgare	HORVU1Hr1G068200.2	CNL	complete	HORVU1Hr1G068200.2:14	HORVU1Hr1G068200.2:1050	NSNQSNLSILPIVGMGGLGKTTLTQLVYNDTRIKEHFQLRVWLCVSENFDQMKLTKETIESVASEFESVISGVSSVTTNMNLLQEDLSKKLKGKRFLLVLDDVWNEDPEKWDTYRRALLTGGKGSRIVVTTRNKNVGKLMGGMTPYYLNQLSDNDCWFLFRSYAFVDGNSDAHPNLEMIGKEIVKKLKGLPLAAKAIGSLLCSQDTEDDWK	no	17,16,1,6,4,5,10,3,12,2,8,7,9,9,11,11,11,11,11,11,11,11,11	yes	2.9e-49	2e-11	NA	NA	NA	175	375	580	no	no	yes	NA	NA
Hordeum vulgare	HORVU1Hr1G075170.1	CNL	partial	HORVU1Hr1G075170.1:8	HORVU1Hr1G075170.1:829	VDTEKNLSAVSIVAMGGAGKTTLARKVYTSSVVEQHFETIAWVTVSQKYKGIDLMKDIMKQIMGKRDDSLEQMQEYEVGKKIHDFLLNKIYLVVLDDVWETDTWDQINRRVKAFPNASNGSRVLLTTRKEDVANHIQMPTHVHHLKKLDEDESWKLFNSKALPSYIRRTISDVYEFEELGRNLARKCDGLPLALAVLAGYLSGNLNTQTWC	no	17,1,6,4,5,10,3,12,2,8,7,9,11,11	yes	1.6e-56	8.9e-08	NA	NA	NA	172	382	316	no	no	yes	NA	NA
Hordeum vulgare	HORVU1Hr1G075170.10	CNL	partial	HORVU1Hr1G075170.10:2	HORVU1Hr1G075170.10:110	NA	no	12,2,8,7	NA	NA	NA	NA	NA	NA	NA	NA	NA	NA	NA	NA	NA	NA
Hordeum vulgare	HORVU1Hr1G075170.12	NA	partial	HORVU1Hr1G075170.12:65	HORVU1Hr1G075170.12:296	NA	no	9,11,11	NA	NA	6.8e-10	NA	0.054	NA	NA	NA	NA	NA	NA	NA	NA	NA
Hordeum vulgare	HORVU1Hr1G075170.2	CNL	partial	HORVU1Hr1G075170.2:8	HORVU1Hr1G075170.2:829	VDTEKNLSAVSIVAMGGAGKTTLARKVYTSSVVEQHFETIAWVTVSQKYKGIDLMKDIMKQIMGKRDDSLEQMQEYEVGKKIHDFLLNKIYLVVLDDVWETDTWDQINRRVKAFPNASNGSRVLLTTRKEDVANHIQMPTHVHHLKKLDEDESWKLFNSKALPSYIRRTISDVYEFEELGRNLARKCDGLPLALAVLAGYLSGNLNTQTWC	no	17,1,6,4,5,10,3,12,2,8,7,9,11,11	yes	1.6e-56	8.9e-08	NA	NA	NA	172	382	316	no	no	NA	NA	NA
Hordeum vulgare	HORVU1Hr1G075170.3	CNL	partial	HORVU1Hr1G075170.3:8	HORVU1Hr1G075170.3:517	VDTEKNLSAVSIVAMGGAGKTTLARKVYTSSVVEQHFETIAWVTVSQKYKGIDLMKDIMKQIMGKRDDSLEQMQEYEVGKKIHDFLLNKIYLVVLDDVWETDTWDQINRRVKAFPNASNGSRVLLTTRKEDVANHIQMPTHVHHLKKLDEDESWKLFNSKALPSYIRRTISDVYEFEELGRNLARKCDGLPLALAVLAGYLSGNLNTQTWC	no	17,1,6,4,5,10,3,12,2,8,7	NA	5.4e-57	NA	NA	NA	NA	NA	NA	NA	NA	NA	NA	NA	NA
Hordeum vulgare	HORVU1Hr1G075170.4	CNL	partial	HORVU1Hr1G075170.4:8	HORVU1Hr1G075170.4:517	VDTEKNLSAVSIVAMGGAGKTTLARKVYTSSVVEQHFETIAWVTVSQKYKGIDLMKDIMKQIMGKRDDSLEQMQEYEVGKKIHDFLLNKIYLVVLDDVWETDTWDQINRRVKAFPNASNGSRVLLTTRKEDVANHIQMPTHVHHLKKLDEDESWKLFNSKALPSYIRRTISDVYEFEELGRNLARKCDGLPLALAVLAGYLSGNLNTQTWC	no	17,1,6,4,5,10,3,12,2,8,7	NA	5.6e-57	NA	NA	NA	NA	NA	NA	NA	NA	NA	NA	NA	NA
Hordeum vulgare	HORVU1Hr1G075170.5	CNL	partial	HORVU1Hr1G075170.5:8	HORVU1Hr1G075170.5:517	VDTEKNLSAVSIVAMGGAGKTTLARKVYTSSVVEQHFETIAWVTVSQKYKGIDLMKDIMKQIMGKRDDSLEQMQEYEVGKKIHDFLLNKIYLVVLDDVWETDTWDQINRRVKAFPNASNGSRVLLTTRKEDVANHIQMPTHVHHLKKLDEDESWKLFNSKALPSYIRRTISDVYEFEELGRNLARKCDGLPLALAVLAGYLSGNLNTQTWC	no	17,1,6,4,5,10,3,12,2,8,7	NA	5.4e-57	NA	NA	NA	NA	NA	NA	NA	NA	NA	NA	NA	NA
Hordeum vulgare	HORVU1Hr1G075170.6	CNL	partial	HORVU1Hr1G075170.6:71	HORVU1Hr1G075170.6:491	NA	no	12,2,8,7,9,11,11	NA	NA	8e-09	NA	0.1	NA	NA	NA	NA	NA	NA	NA	NA	NA
Hordeum vulgare	HORVU1Hr1G075170.7	CNL	partial	HORVU1Hr1G075170.7:8	HORVU1Hr1G075170.7:829	VDTEKNLSAVSIVAMGGAGKTTLARKVYTSSVVEQHFETIAWVTVSQKYKGIDLMKDIMKQIMGKRDDSLEQMQEYEVGKKIHDFLLNKIYLVVLDDVWETDTWDQINRRVKAFPNASNGSRVLLTTRKEDVANHIQMPTHVHHLKKLDEDESWKLFNSKALPSYIRRTISDVYEFEELGRNLARKCDGLPLALAVLAGYLSGNLNTQTWC	no	17,1,6,4,5,10,3,12,2,8,7,9,11,11	yes	1.6e-56	8.9e-08	NA	NA	NA	172	382	316	no	no	NA	NA	NA
Hordeum vulgare	HORVU1Hr1G075170.8	CNL	partial	HORVU1Hr1G075170.8:32	HORVU1Hr1G075170.8:436	NA	no	2,8,7,9,11,11	NA	NA	4.4e-09	NA	0.063	NA	NA	NA	NA	NA	NA	NA	NA	NA
Hordeum vulgare	HORVU1Hr1G075170.9	CNL	partial	HORVU1Hr1G075170.9:8	HORVU1Hr1G075170.9:517	VDTEKNLSAVSIVAMGGAGKTTLARKVYTSSVVEQHFETIAWVTVSQKYKGIDLMKDIMKQIMGKRDDSLEQMQEYEVGKKIHDFLLNKIYLVVLDDVWETDTWDQINRRVKAFPNASNGSRVLLTTRKEDVANHIQMPTHVHHLKKLDEDESWKLFNSKALPSYIRRTISDVYEFEELGRNLARKCDGLPLALAVLAGYLSGNLNTQTWC	no	17,1,6,4,5,10,3,12,2,8,7	NA	8e-57	NA	NA	NA	NA	NA	NA	NA	NA	NA	NA	NA	NA
Hordeum vulgare	HORVU1Hr1G079170.1	CNL	partial	HORVU1Hr1G079170.1:80	HORVU1Hr1G079170.1:1178	LRYRLGVGVLPVVGAEGVGKTALAQLIFHHEIIKGEFPVRMWAHVSGELLLSKQLMAQMIHRVVTGDAGHDVQGARELLLAQLAGKRFLLVLDHVTDVSDAQWRDLMEVLQPAARRSLIIVTTQSEDVATAIGTMPPLILSLLAFDDYWRMFKHFAFGAADEAEEDCTPLVDEWDDLEEEDELSPMEQIACQIAKNMGCSTLPARAIGRSL	no	16,1,4,5,10,12,2,8,9,9,9,11,11,11,19,11	yes	1.7e-23	2.1e-07	NA	NA	NA	218	384	627	no	no	NA	NA	NA
Hordeum vulgare	HORVU1Hr1G079170.10	CNL	partial	HORVU1Hr1G079170.10:80	HORVU1Hr1G079170.10:1216	LRYRLGVGVLPVVGAEGVGKTALAQLIFHHEIIKGEFPVRMWAHVSGELLLSKQLMAQMIHRVVTGDAGHDVQGARELLLAQLAGKRFLLVLDHVTDVSDAQWRDLMEVLQPAARRSLIIVTTQSEDVATAIGTMPPLILSLLAFDDYWRMFKHFAFGAADEAEEDCTPLVDEWDDLEEEDELSPMEQIACQIAKNMGCSTLPARAIGRSL	no	16,1,4,5,10,12,2,8,9,9,9,11,11,11,11,19,11	yes	1.6e-23	2.2e-07	NA	NA	NA	218	384	665	no	no	NA	NA	NA
Hordeum vulgare	HORVU1Hr1G079170.11	CNL	partial	HORVU1Hr1G079170.11:80	HORVU1Hr1G079170.11:1216	LRYRLGVGVLPVVGAEGVGKTALAQLIFHHEIIKGEFPVRMWAHVSGELLLSKQLMAQMIHRVVTGDAGHDVQGARELLLAQLAGKRFLLVLDHVTDVSDAQWRDLMEVLQPAARRSLIIVTTQSEDVATAIGTMPPLILSLLAFDDYWRMFKHFAFGAADEAEEDCTPLVDEWDDLEEEDELSPMEQIACQIAKNMGCSTLPARAIGRSL	no	16,1,4,5,10,12,2,8,9,9,9,11,11,11,11,19,11	yes	1.6e-23	2.2e-07	NA	NA	NA	218	384	665	no	no	NA	NA	NA
Hordeum vulgare	HORVU1Hr1G079170.12	CNL	partial	HORVU1Hr1G079170.12:80	HORVU1Hr1G079170.12:1216	LRYRLGVGVLPVVGAEGVGKTALAQLIFHHEIIKGEFPVRMWAHVSGELLLSKQLMAQMIHRVVTGDAGHDVQGARELLLAQLAGKRFLLVLDHVTDVSDAQWRDLMEVLQPAARRSLIIVTTQSEDVATAIGTMPPLILSLLAFDDYWRMFKHFAFGAADEAEEDCTPLVDEWDDLEEEDELSPMEQIACQIAKNMGCSTLPARAIGRSL	no	16,1,4,5,10,12,2,8,9,9,9,11,11,11,11,19,11	yes	1.6e-23	2.2e-07	NA	NA	NA	218	384	665	no	no	NA	NA	NA
Hordeum vulgare	HORVU1Hr1G079170.13	CNL	partial	HORVU1Hr1G079170.13:14	HORVU1Hr1G079170.13:669	LRYRLGVGVLPVVGAEGVGKTALAQLIFHHEIIKGEFPVRMWAHVSGELLLSKQLMAQMIHRVVTGDAGHDVQGARELLLAQLAGKRFLLVLDHVTDVSDAQWRDLMEVLQPAARRSLIIVTTQSEDVATAIGTMPPLILSLLAFDDYWRMFKHFAFGAADEAEEDCTPLVDEWDDLEEEDELSPMEQIACQIAKNMGCSTLPARAIGRSL	no	16,1,4,5,10,12,2,8,9,9,9	yes	8.4e-24	1.4e-06	NA	NA	NA	152	384	270	no	no	NA	NA	NA
Hordeum vulgare	HORVU1Hr1G079170.14	CNL	partial	HORVU1Hr1G079170.14:80	HORVU1Hr1G079170.14:1216	LRYRLGVGVLPVVGAEGVGKTALAQLIFHHEIIKGEFPVRMWAHVSGELLLSKQLMAQMIHRVVTGDAGHDVQGARELLLAQLAGKRFLLVLDHVTDVSDAQWRDLMEVLQPAARRSLIIVTTQSEDVATAIGTMPPLILSLLAFDDYWRMFKHFAFGAADEAEEDCTPLVDEWDDLEEEDELSPMEQIACQIAKNMGCSTLPARAIGRSL	no	16,1,4,5,10,12,2,8,9,9,9,11,11,11,11,19,11	yes	1.6e-23	2.2e-07	NA	NA	NA	218	384	665	no	no	NA	NA	NA
Hordeum vulgare	HORVU1Hr1G079170.15	CNL	partial	HORVU1Hr1G079170.15:166	HORVU1Hr1G079170.15:794	LRYRLGVGVLPVVGAEGVGKTALAQLIFHHEIIKGEFPVRMWAHVSGELLLSKQLMAQMIHRVVTGDAGHDVQGARELLLAQLAGKRFLLVLDHVTDVSDAQWRDLMEVLQPAARRSLIIVTTQSEDVATAIGTMPPLILSLLAFDDYWRMFKHFAFGAADEAEEDCTPLVDEWDDLEEEDELSPMEQIACQIAKNMGCSTLPARAIGRSL	no	1,4,5,10,12,2,8,9,9,9,11	yes	7.9e-24	1.5e-06	NA	NA	NA	138	384	331	no	no	NA	NA	NA
Hordeum vulgare	HORVU1Hr1G079170.16	CNL	partial	HORVU1Hr1G079170.16:27	HORVU1Hr1G079170.16:682	LRYRLGVGVLPVVGAEGVGKTALAQLIFHHEIIKGEFPVRMWAHVSGELLLSKQLMAQMIHRVVTGDAGHDVQGARELLLAQLAGKRFLLVLDHVTDVSDAQWRDLMEVLQPAARRSLIIVTTQSEDVATAIGTMPPLILSLLAFDDYWRMFKHFAFGAADEAEEDCTPLVDEWDDLEEEDELSPMEQIACQIAKNMGCSTLPARAIGRSL	no	16,1,4,5,10,12,2,8,9,9,9	yes	9.1e-24	1.5e-06	NA	NA	NA	165	384	293	no	no	NA	NA	NA
Hordeum vulgare	HORVU1Hr1G079170.17	CNL	partial	HORVU1Hr1G079170.17:131	HORVU1Hr1G079170.17:800	LRYRLGVGVLPVVGAEGVGKTALAQLIFHHEIIKGEFPVRMWAHVSGELLLSKQLMAQMIHRVVTGDAGHDVQGARELLLAQLAGKRFLLVLDHVTDVSDAQWRDLMEVLQPAARRSLIIVTTQSEDVATAIGTMPPLILSLLAFDDYWRMFKHFAFGAADEAEEDCTPLVDEWDDLEEEDELSPMEQIACQIAKNMGCSTLPARAIGRSL	no	1,4,5,10,12,2,8,9,9,9,11,11	yes	8.4e-24	1.4e-06	NA	NA	NA	103	384	336	no	no	yes	NA	NA
Hordeum vulgare	HORVU1Hr1G079170.18	CNL	partial	HORVU1Hr1G079170.18:136	HORVU1Hr1G079170.18:625	LRYRLGVGVLPVVGAEGVGKTALAQLIFHHEIIKGEFPVRMWAHVSGELLLSKQLMAQMIHRVVTGDAGHDVQGARELLLAQLAGKRFLLVLDHVTDVSDAQWRDLMEVLQPAARRSLIIVTTQSEDVATAIGTMPPLILSLLAFDDYWRMFKHFAFGAADEAEEDCTPLVDEWDDLEEEDELSPMEQIACQIAKNMGCSTLPARAIGRSL	no	1,4,5,10,12,2,8,9,9,9	yes	7.9e-24	1.4e-06	NA	NA	NA	108	384	293	no	no	NA	NA	NA
Hordeum vulgare	HORVU1Hr1G079170.2	CNL	partial	HORVU1Hr1G079170.2:80	HORVU1Hr1G079170.2:874	LRYRLGVGVLPVVGAEGVGKTALAQLIFHHEIIKGEFPVRMWAHVSGELLLSKQLMAQMIHRVVTGDAGHDVQGARELLLAQLAGKRFLLVLDHVTDVSDAQWRDLMEVLQPAARRSLIIVTTQSEDVATAIGTMPPLILSLLAFDDYWRMFKHFAFGAADEAEEDCTPLVDEWDDLEEEDELSPMEQIACQIAKNMGCSTLPARAIGRSL	no	16,1,4,5,10,12,2,8,9,9,9,11	yes	9.6e-24	1.7e-06	NA	NA	NA	218	384	331	no	no	NA	NA	NA
Hordeum vulgare	HORVU1Hr1G079170.4	CNL	partial	HORVU1Hr1G079170.4:80	HORVU1Hr1G079170.4:1216	LRYRLGVGVLPVVGAEGVGKTALAQLIFHHEIIKGEFPVRMWAHVSGELLLSKQLMAQMIHRVVTGDAGHDVQGARELLLAQLAGKRFLLVLDHVTDVSDAQWRDLMEVLQPAARRSLIIVTTQSEDVATAIGTMPPLILSLLAFDDYWRMFKHFAFGAADEAEEDCTPLVDEWDDLEEEDELSPMEQIACQIAKNMGCSTLPARAIGRSL	no	16,1,4,5,10,12,2,8,9,9,9,11,11,11,11,19,11	yes	1.6e-23	2.2e-07	NA	NA	NA	218	384	665	no	no	NA	NA	NA
Hordeum vulgare	HORVU1Hr1G079170.5	CNL	partial	HORVU1Hr1G079170.5:80	HORVU1Hr1G079170.5:1216	LRYRLGVGVLPVVGAEGVGKTALAQLIFHHEIIKGEFPVRMWAHVSGELLLSKQLMAQMIHRVVTGDAGHDVQGARELLLAQLAGKRFLLVLDHVTDVSDAQWRDLMEVLQPAARRSLIIVTTQSEDVATAIGTMPPLILSLLAFDDYWRMFKHFAFGAADEAEEDCTPLVDEWDDLEEEDELSPMEQIACQIAKNMGCSTLPARAIGRSL	no	16,1,4,5,10,12,2,8,9,9,9,11,11,11,11,19,11	yes	1.6e-23	2.2e-07	NA	NA	NA	218	384	665	no	no	NA	NA	NA
Hordeum vulgare	HORVU1Hr1G079170.6	CNL	partial	HORVU1Hr1G079170.6:160	HORVU1Hr1G079170.6:1130	LRYRLGVGVLPVVGAEGVGKTALAQLIFHHEIIKGEFPVRMWAHVSGELLLSKQLMAQMIHRVVTGDAGHDVQGARELLLAQLAGKRFLLVLDHVTDVSDAQWRDLMEVLQPAARRSLIIVTTQSEDVATAIGTMPPLILSLLAFDDYWRMFKHFAFGAADEAEEDCTPLVDEWDDLEEEDELSPMEQIACQIAKNMGCSTLPARAIGRSL	no	1,4,5,10,12,2,8,9,9,9,11,11,11,11,19,11	yes	1.4e-23	1.6e-07	NA	NA	NA	132	384	665	no	no	NA	NA	NA
Hordeum vulgare	HORVU1Hr1G079170.7	CNL	partial	HORVU1Hr1G079170.7:80	HORVU1Hr1G079170.7:1216	LRYRLGVGVLPVVGAEGVGKTALAQLIFHHEIIKGEFPVRMWAHVSGELLLSKQLMAQMIHRVVTGDAGHDVQGARELLLAQLAGKRFLLVLDHVTDVSDAQWRDLMEVLQPAARRSLIIVTTQSEDVATAIGTMPPLILSLLAFDDYWRMFKHFAFGAADEAEEDCTPLVDEWDDLEEEDELSPMEQIACQIAKNMGCSTLPARAIGRSL	no	16,1,4,5,10,12,2,8,9,9,9,11,11,11,11,19,11	yes	1.6e-23	2.2e-07	NA	NA	NA	218	384	665	no	no	NA	NA	NA
Hordeum vulgare	HORVU1Hr1G079170.8	CNL	partial	HORVU1Hr1G079170.8:125	HORVU1Hr1G079170.8:614	LRYRLGVGVLPVVGAEGVGKTALAQLIFHHEIIKGEFPVRMWAHVSGELLLSKQLMAQMIHRVVTGDAGHDVQGARELLLAQLAGKRFLLVLDHVTDVSDAQWRDLMEVLQPAARRSLIIVTTQSEDVATAIGTMPPLILSLLAFDDYWRMFKHFAFGAADEAEEDCTPLVDEWDDLEEEDELSPMEQIACQIAKNMGCSTLPARAIGRSL	no	1,4,5,10,12,2,8,9,9,9	yes	7.6e-24	1.3e-06	NA	NA	NA	97	384	293	no	no	NA	NA	NA
Hordeum vulgare	HORVU1Hr1G079170.9	CNL	partial	HORVU1Hr1G079170.9:11	HORVU1Hr1G079170.9:1109	LRYRLGVGVLPVVGAEGVGKTALAQLIFHHEIIKGEFPVRMWAHVSGELLLSKQLMAQMIHRVVTGDAGHDVQGARELLLAQLAGKRFLLVLDHVTDVSDAQWRDLMEVLQPAARRSLIIVTTQSEDVATAIGTMPPLILSLLAFDDYWRMFKHFAFGAADEAEEDCTPLVDEWDDLEEEDELSPMEQIACQIAKNMGCSTLPARAIGRSL	no	16,1,4,5,10,12,2,8,9,9,9,11,11,11,19,11	yes	1.6e-23	1.9e-07	NA	NA	NA	149	384	627	no	no	NA	NA	NA
Hordeum vulgare	HORVU1Hr1G083100.1	CNL	complete	HORVU1Hr1G083100.1:74	HORVU1Hr1G083100.1:1353	THHGQTVSVLPIVGPGGIGKTTFTQHLYNDSRTQEHFAVMVWVCVSTDFDVLKLTQQIHNCIPENETASETTNLDQLQKSIAQRLKSKRFLIVLDDIWKCNSEDEWKTLLAPFTKGEAKGSMVLVTTRFPKLAGMMKTINPVELQGLESNDFFTFFESCIFGEHKPRDYEDELGGIARDIARKLKGSPLAAKTVGRLLKKNLSREHWNGVL	no	16,1,6,4,5,3,12,2,7,11,11,11,11	yes	2.8e-39	0.07	NA	NA	NA	231	382	777	no	no	NA	NA	NA
Hordeum vulgare	HORVU1Hr1G083100.10	CNL	complete	HORVU1Hr1G083100.10:74	HORVU1Hr1G083100.10:1353	THHGQTVSVLPIVGPGGIGKTTFTQHLYNDSRTQEHFAVMVWVCVSTDFDVLKLTQQIHNCIPENETASETTNLDQLQKSIAQRLKSKRFLIVLDDIWKCNSEDEWKTLLAPFTKGEAKGSMVLVTTRFPKLAGMMKTINPVELQGLESNDFFTFFESCIFGEHKPRDYEDELGGIARDIARKLKGSPLAAKTVGRLLKKNLSREHWNGVL	no	16,1,6,4,5,3,12,2,7,11,11,11,11	yes	2.8e-39	0.07	NA	NA	NA	231	382	777	no	no	NA	NA	NA
Hordeum vulgare	HORVU1Hr1G083100.11	CNL	complete	HORVU1Hr1G083100.11:74	HORVU1Hr1G083100.11:1353	THHGQTVSVLPIVGPGGIGKTTFTQHLYNDSRTQEHFAVMVWVCVSTDFDVLKLTQQIHNCIPENETASETTNLDQLQKSIAQRLKSKRFLIVLDDIWKCNSEDEWKTLLAPFTKGEAKGSMVLVTTRFPKLAGMMKTINPVELQGLESNDFFTFFESCIFGEHKPRDYEDELGGIARDIARKLKGSPLAAKTVGRLLKKNLSREHWNGVL	no	16,1,6,4,5,3,12,2,7,11,11,11,11	yes	2.8e-39	0.07	NA	NA	NA	231	382	777	no	no	NA	NA	NA
Hordeum vulgare	HORVU1Hr1G083100.12	CNL	complete	HORVU1Hr1G083100.12:74	HORVU1Hr1G083100.12:1353	THHGQTVSVLPIVGPGGIGKTTFTQHLYNDSRTQEHFAVMVWVCVSTDFDVLKLTQQIHNCIPENETASETTNLDQLQKSIAQRLKSKRFLIVLDDIWKCNSEDEWKTLLAPFTKGEAKGSMVLVTTRFPKLAGMMKTINPVELQGLESNDFFTFFESCIFGEHKPRDYEDELGGIARDIARKLKGSPLAAKTVGRLLKKNLSREHWNGVL	no	16,1,6,4,5,3,12,2,7,11,11,11,11	yes	2.8e-39	0.07	NA	NA	NA	231	382	777	no	no	NA	NA	NA
Hordeum vulgare	HORVU1Hr1G083100.13	CNL	complete	HORVU1Hr1G083100.13:74	HORVU1Hr1G083100.13:1353	THHGQTVSVLPIVGPGGIGKTTFTQHLYNDSRTQEHFAVMVWVCVSTDFDVLKLTQQIHNCIPENETASETTNLDQLQKSIAQRLKSKRFLIVLDDIWKCNSEDEWKTLLAPFTKGEAKGSMVLVTTRFPKLAGMMKTINPVELQGLESNDFFTFFESCIFGEHKPRDYEDELGGIARDIARKLKGSPLAAKTVGRLLKKNLSREHWNGVL	no	16,1,6,4,5,3,12,2,7,11,11,11,11	yes	2.8e-39	0.07	NA	NA	NA	231	382	777	no	no	NA	NA	NA
Hordeum vulgare	HORVU1Hr1G083100.14	CNL	complete	HORVU1Hr1G083100.14:74	HORVU1Hr1G083100.14:1353	THHGQTVSVLPIVGPGGIGKTTFTQHLYNDSRTQEHFAVMVWVCVSTDFDVLKLTQQIHNCIPENETASETTNLDQLQKSIAQRLKSKRFLIVLDDIWKCNSEDEWKTLLAPFTKGEAKGSMVLVTTRFPKLAGMMKTINPVELQGLESNDFFTFFESCIFGEHKPRDYEDELGGIARDIARKLKGSPLAAKTVGRLLKKNLSREHWNGVL	no	16,1,6,4,5,3,12,2,7,11,11,11,11	yes	2.8e-39	0.07	NA	NA	NA	231	382	777	no	no	NA	NA	NA
Hordeum vulgare	HORVU1Hr1G083100.15	CNL	complete	HORVU1Hr1G083100.15:114	HORVU1Hr1G083100.15:1393	THHGQTVSVLPIVGPGGIGKTTFTQHLYNDSRTQEHFAVMVWVCVSTDFDVLKLTQQIHNCIPENETASETTNLDQLQKSIAQRLKSKRFLIVLDDIWKCNSEDEWKTLLAPFTKGEAKGSMVLVTTRFPKLAGMMKTINPVELQGLESNDFFTFFESCIFGEHKPRDYEDELGGIARDIARKLKGSPLAAKTVGRLLKKNLSREHWNGVL	no	16,1,6,4,5,3,12,2,7,11,11,11,11	yes	2.9e-39	0.088	NA	NA	NA	271	382	777	no	no	NA	NA	NA
Hordeum vulgare	HORVU1Hr1G083100.16	CNL	complete	HORVU1Hr1G083100.16:112	HORVU1Hr1G083100.16:1391	THHGQTVSVLPIVGPGGIGKTTFTQHLYNDSRTQEHFAVMVWVCVSTDFDVLKLTQQIHNCIPENETASETTNLDQLQKSIAQRLKSKRFLIVLDDIWKCNSEDEWKTLLAPFTKGEAKGSMVLVTTRFPKLAGMMKTINPVELQGLESNDFFTFFESCIFGEHKPRDYEDELGGIARDIARKLKGSPLAAKTVGRLLKKNLSREHWNGVL	no	16,1,6,4,5,3,12,2,7,11,11,11,11	yes	2.9e-39	0.087	NA	NA	NA	269	382	777	no	no	NA	NA	NA
Hordeum vulgare	HORVU1Hr1G083100.17	CNL	complete	HORVU1Hr1G083100.17:112	HORVU1Hr1G083100.17:1391	THHGQTVSVLPIVGPGGIGKTTFTQHLYNDSRTQEHFAVMVWVCVSTDFDVLKLTQQIHNCIPENETASETTNLDQLQKSIAQRLKSKRFLIVLDDIWKCNSEDEWKTLLAPFTKGEAKGSMVLVTTRFPKLAGMMKTINPVELQGLESNDFFTFFESCIFGEHKPRDYEDELGGIARDIARKLKGSPLAAKTVGRLLKKNLSREHWNGVL	no	16,1,6,4,5,3,12,2,7,11,11,11,11	yes	2.9e-39	0.087	NA	NA	NA	269	382	777	no	no	NA	NA	NA
Hordeum vulgare	HORVU1Hr1G083100.18	CNL	complete	HORVU1Hr1G083100.18:112	HORVU1Hr1G083100.18:1391	THHGQTVSVLPIVGPGGIGKTTFTQHLYNDSRTQEHFAVMVWVCVSTDFDVLKLTQQIHNCIPENETASETTNLDQLQKSIAQRLKSKRFLIVLDDIWKCNSEDEWKTLLAPFTKGEAKGSMVLVTTRFPKLAGMMKTINPVELQGLESNDFFTFFESCIFGEHKPRDYEDELGGIARDIARKLKGSPLAAKTVGRLLKKNLSREHWNGVL	no	16,1,6,4,5,3,12,2,7,11,11,11,11	yes	2.9e-39	0.087	NA	NA	NA	269	382	777	no	no	NA	NA	NA
Hordeum vulgare	HORVU1Hr1G083100.19	CNL	complete	HORVU1Hr1G083100.19:112	HORVU1Hr1G083100.19:1391	THHGQTVSVLPIVGPGGIGKTTFTQHLYNDSRTQEHFAVMVWVCVSTDFDVLKLTQQIHNCIPENETASETTNLDQLQKSIAQRLKSKRFLIVLDDIWKCNSEDEWKTLLAPFTKGEAKGSMVLVTTRFPKLAGMMKTINPVELQGLESNDFFTFFESCIFGEHKPRDYEDELGGIARDIARKLKGSPLAAKTVGRLLKKNLSREHWNGVL	no	16,1,6,4,5,3,12,2,7,11,11,11,11	yes	2.9e-39	0.087	NA	NA	NA	269	382	777	no	no	NA	NA	NA
Hordeum vulgare	HORVU1Hr1G083100.2	CNL	complete	HORVU1Hr1G083100.2:74	HORVU1Hr1G083100.2:1353	THHGQTVSVLPIVGPGGIGKTTFTQHLYNDSRTQEHFAVMVWVCVSTDFDVLKLTQQIHNCIPENETASETTNLDQLQKSIAQRLKSKRFLIVLDDIWKCNSEDEWKTLLAPFTKGEAKGSMVLVTTRFPKLAGMMKTINPVELQGLESNDFFTFFESCIFGEHKPRDYEDELGGIARDIARKLKGSPLAAKTVGRLLKKNLSREHWNGVL	no	16,1,6,4,5,3,12,2,7,11,11,11,11	yes	2.8e-39	0.07	NA	NA	NA	231	382	777	no	no	NA	NA	NA
Hordeum vulgare	HORVU1Hr1G083100.20	CNL	complete	HORVU1Hr1G083100.20:112	HORVU1Hr1G083100.20:1391	THHGQTVSVLPIVGPGGIGKTTFTQHLYNDSRTQEHFAVMVWVCVSTDFDVLKLTQQIHNCIPENETASETTNLDQLQKSIAQRLKSKRFLIVLDDIWKCNSEDEWKTLLAPFTKGEAKGSMVLVTTRFPKLAGMMKTINPVELQGLESNDFFTFFESCIFGEHKPRDYEDELGGIARDIARKLKGSPLAAKTVGRLLKKNLSREHWNGVL	no	16,1,6,4,5,3,12,2,7,11,11,11,11	yes	2.9e-39	0.087	NA	NA	NA	269	382	777	no	no	NA	NA	NA
Hordeum vulgare	HORVU1Hr1G083100.21	CNL	complete	HORVU1Hr1G083100.21:110	HORVU1Hr1G083100.21:977	THHGQTVSVLPIVGPGGIGKTTFTQHLYNDSRTQEHFAVMVWVCVSTDFDVLKLTQQIHNCIPENETASETTNLDQLQKSIAQRLKSKRFLIVLDDIWKCNSEDEWKTLLAPFTKGEAKGSMVLVTTRFPKLAGMMKTINPVELQGLESNDFFTFFESCIFGEHKPRDYEDELGGIARDIARKLKGSPLAAKTVGRLLKKNLSREHWNGVL	no	16,1,6,4,5,3,12,2,7,11,11,11	yes	2.8e-39	NA	NA	NA	NA	267	382	735	no	no	NA	NA	NA
Hordeum vulgare	HORVU1Hr1G083100.22	CNL	complete	HORVU1Hr1G083100.22:110	HORVU1Hr1G083100.22:977	THHGQTVSVLPIVGPGGIGKTTFTQHLYNDSRTQEHFAVMVWVCVSTDFDVLKLTQQIHNCIPENETASETTNLDQLQKSIAQRLKSKRFLIVLDDIWKCNSEDEWKTLLAPFTKGEAKGSMVLVTTRFPKLAGMMKTINPVELQGLESNDFFTFFESCIFGEHKPRDYEDELGGIARDIARKLKGSPLAAKTVGRLLKKNLSREHWNGVL	no	16,1,6,4,5,3,12,2,7,11,11,11	yes	2.8e-39	NA	NA	NA	NA	267	382	741	no	no	NA	NA	NA
Hordeum vulgare	HORVU1Hr1G083100.23	CNL	complete	HORVU1Hr1G083100.23:110	HORVU1Hr1G083100.23:1389	THHGQTVSVLPIVGPGGIGKTTFTQHLYNDSRTQEHFAVMVWVCVSTDFDVLKLTQQIHNCIPENETASETTNLDQLQKSIAQRLKSKRFLIVLDDIWKCNSEDEWKTLLAPFTKGEAKGSMVLVTTRFPKLAGMMKTINPVELQGLESNDFFTFFESCIFGEHKPRDYEDELGGIARDIARKLKGSPLAAKTVGRLLKKNLSREHWNGVL	no	16,1,6,4,5,3,12,2,7,11,11,11,11	yes	2.9e-39	0.086	NA	NA	NA	267	382	777	no	no	NA	NA	NA
Hordeum vulgare	HORVU1Hr1G083100.24	CNL	complete	HORVU1Hr1G083100.24:109	HORVU1Hr1G083100.24:1388	THHGQTVSVLPIVGPGGIGKTTFTQHLYNDSRTQEHFAVMVWVCVSTDFDVLKLTQQIHNCIPENETASETTNLDQLQKSIAQRLKSKRFLIVLDDIWKCNSEDEWKTLLAPFTKGEAKGSMVLVTTRFPKLAGMMKTINPVELQGLESNDFFTFFESCIFGEHKPRDYEDELGGIARDIARKLKGSPLAAKTVGRLLKKNLSREHWNGVL	no	16,1,6,4,5,3,12,2,7,11,11,11,11	yes	2.9e-39	0.086	NA	NA	NA	266	382	777	no	no	NA	NA	NA
Hordeum vulgare	HORVU1Hr1G083100.25	CNL	complete	HORVU1Hr1G083100.25:109	HORVU1Hr1G083100.25:1388	THHGQTVSVLPIVGPGGIGKTTFTQHLYNDSRTQEHFAVMVWVCVSTDFDVLKLTQQIHNCIPENETASETTNLDQLQKSIAQRLKSKRFLIVLDDIWKCNSEDEWKTLLAPFTKGEAKGSMVLVTTRFPKLAGMMKTINPVELQGLESNDFFTFFESCIFGEHKPRDYEDELGGIARDIARKLKGSPLAAKTVGRLLKKNLSREHWNGVL	no	16,1,6,4,5,3,12,2,7,11,11,11,11	yes	2.9e-39	0.086	NA	NA	NA	266	382	777	no	no	NA	NA	NA
Hordeum vulgare	HORVU1Hr1G083100.26	CNL	complete	HORVU1Hr1G083100.26:109	HORVU1Hr1G083100.26:1388	THHGQTVSVLPIVGPGGIGKTTFTQHLYNDSRTQEHFAVMVWVCVSTDFDVLKLTQQIHNCIPENETASETTNLDQLQKSIAQRLKSKRFLIVLDDIWKCNSEDEWKTLLAPFTKGEAKGSMVLVTTRFPKLAGMMKTINPVELQGLESNDFFTFFESCIFGEHKPRDYEDELGGIARDIARKLKGSPLAAKTVGRLLKKNLSREHWNGVL	no	16,1,6,4,5,3,12,2,7,11,11,11,11	yes	2.9e-39	0.086	NA	NA	NA	266	382	777	no	no	NA	NA	NA
Hordeum vulgare	HORVU1Hr1G083100.27	CNL	complete	HORVU1Hr1G083100.27:109	HORVU1Hr1G083100.27:1388	THHGQTVSVLPIVGPGGIGKTTFTQHLYNDSRTQEHFAVMVWVCVSTDFDVLKLTQQIHNCIPENETASETTNLDQLQKSIAQRLKSKRFLIVLDDIWKCNSEDEWKTLLAPFTKGEAKGSMVLVTTRFPKLAGMMKTINPVELQGLESNDFFTFFESCIFGEHKPRDYEDELGGIARDIARKLKGSPLAAKTVGRLLKKNLSREHWNGVL	no	16,1,6,4,5,3,12,2,7,11,11,11,11	yes	2.9e-39	0.086	NA	NA	NA	266	382	777	no	no	NA	NA	NA
Hordeum vulgare	HORVU1Hr1G083100.28	CNL	complete	HORVU1Hr1G083100.28:101	HORVU1Hr1G083100.28:1380	THHGQTVSVLPIVGPGGIGKTTFTQHLYNDSRTQEHFAVMVWVCVSTDFDVLKLTQQIHNCIPENETASETTNLDQLQKSIAQRLKSKRFLIVLDDIWKCNSEDEWKTLLAPFTKGEAKGSMVLVTTRFPKLAGMMKTINPVELQGLESNDFFTFFESCIFGEHKPRDYEDELGGIARDIARKLKGSPLAAKTVGRLLKKNLSREHWNGVL	no	16,1,6,4,5,3,12,2,7,11,11,11,11	yes	2.9e-39	0.082	NA	NA	NA	258	382	777	no	no	NA	NA	NA
Hordeum vulgare	HORVU1Hr1G083100.29	CNL	complete	HORVU1Hr1G083100.29:101	HORVU1Hr1G083100.29:1380	THHGQTVSVLPIVGPGGIGKTTFTQHLYNDSRTQEHFAVMVWVCVSTDFDVLKLTQQIHNCIPENETASETTNLDQLQKSIAQRLKSKRFLIVLDDIWKCNSEDEWKTLLAPFTKGEAKGSMVLVTTRFPKLAGMMKTINPVELQGLESNDFFTFFESCIFGEHKPRDYEDELGGIARDIARKLKGSPLAAKTVGRLLKKNLSREHWNGVL	no	16,1,6,4,5,3,12,2,7,11,11,11,11	yes	2.9e-39	0.082	NA	NA	NA	258	382	777	no	no	yes	NA	NA
Hordeum vulgare	HORVU1Hr1G083100.3	CNL	complete	HORVU1Hr1G083100.3:74	HORVU1Hr1G083100.3:1353	THHGQTVSVLPIVGPGGIGKTTFTQHLYNDSRTQEHFAVMVWVCVSTDFDVLKLTQQIHNCIPENETASETTNLDQLQKSIAQRLKSKRFLIVLDDIWKCNSEDEWKTLLAPFTKGEAKGSMVLVTTRFPKLAGMMKTINPVELQGLESNDFFTFFESCIFGEHKPRDYEDELGGIARDIARKLKGSPLAAKTVGRLLKKNLSREHWNGVL	no	16,1,6,4,5,3,12,2,7,11,11,11,11	yes	2.8e-39	0.07	NA	NA	NA	231	382	777	no	no	NA	NA	NA
Hordeum vulgare	HORVU1Hr1G083100.30	CNL	complete	HORVU1Hr1G083100.30:99	HORVU1Hr1G083100.30:1378	THHGQTVSVLPIVGPGGIGKTTFTQHLYNDSRTQEHFAVMVWVCVSTDFDVLKLTQQIHNCIPENETASETTNLDQLQKSIAQRLKSKRFLIVLDDIWKCNSEDEWKTLLAPFTKGEAKGSMVLVTTRFPKLAGMMKTINPVELQGLESNDFFTFFESCIFGEHKPRDYEDELGGIARDIARKLKGSPLAAKTVGRLLKKNLSREHWNGVL	no	16,1,6,4,5,3,12,2,7,11,11,11,11	yes	2.9e-39	0.081	NA	NA	NA	256	382	777	no	no	NA	NA	NA
Hordeum vulgare	HORVU1Hr1G083100.31	CNL	complete	HORVU1Hr1G083100.31:99	HORVU1Hr1G083100.31:966	THHGQTVSVLPIVGPGGIGKTTFTQHLYNDSRTQEHFAVMVWVCVSTDFDVLKLTQQIHNCIPENETASETTNLDQLQKSIAQRLKSKRFLIVLDDIWKCNSEDEWKTLLAPFTKGEAKGSMVLVTTRFPKLAGMMKTINPVELQGLESNDFFTFFESCIFGEHKPRDYEDELGGIARDIARKLKGSPLAAKTVGRLLKKNLSREHWNGVL	no	16,1,6,4,5,3,12,2,7,11,11,11	yes	2.7e-39	NA	NA	NA	NA	256	382	735	no	no	NA	NA	NA
Hordeum vulgare	HORVU1Hr1G083100.32	CNL	complete	HORVU1Hr1G083100.32:99	HORVU1Hr1G083100.32:1378	THHGQTVSVLPIVGPGGIGKTTFTQHLYNDSRTQEHFAVMVWVCVSTDFDVLKLTQQIHNCIPENETASETTNLDQLQKSIAQRLKSKRFLIVLDDIWKCNSEDEWKTLLAPFTKGEAKGSMVLVTTRFPKLAGMMKTINPVELQGLESNDFFTFFESCIFGEHKPRDYEDELGGIARDIARKLKGSPLAAKTVGRLLKKNLSREHWNGVL	no	16,1,6,4,5,3,12,2,7,11,11,11,11	yes	2.9e-39	0.081	NA	NA	NA	256	382	777	no	no	NA	NA	NA
Hordeum vulgare	HORVU1Hr1G083100.33	CNL	complete	HORVU1Hr1G083100.33:99	HORVU1Hr1G083100.33:1378	THHGQTVSVLPIVGPGGIGKTTFTQHLYNDSRTQEHFAVMVWVCVSTDFDVLKLTQQIHNCIPENETASETTNLDQLQKSIAQRLKSKRFLIVLDDIWKCNSEDEWKTLLAPFTKGEAKGSMVLVTTRFPKLAGMMKTINPVELQGLESNDFFTFFESCIFGEHKPRDYEDELGGIARDIARKLKGSPLAAKTVGRLLKKNLSREHWNGVL	no	16,1,6,4,5,3,12,2,7,11,11,11,11	yes	2.9e-39	0.081	NA	NA	NA	256	382	777	no	no	NA	NA	NA
Hordeum vulgare	HORVU1Hr1G083100.34	CNL	complete	HORVU1Hr1G083100.34:98	HORVU1Hr1G083100.34:1377	THHGQTVSVLPIVGPGGIGKTTFTQHLYNDSRTQEHFAVMVWVCVSTDFDVLKLTQQIHNCIPENETASETTNLDQLQKSIAQRLKSKRFLIVLDDIWKCNSEDEWKTLLAPFTKGEAKGSMVLVTTRFPKLAGMMKTINPVELQGLESNDFFTFFESCIFGEHKPRDYEDELGGIARDIARKLKGSPLAAKTVGRLLKKNLSREHWNGVL	no	16,1,6,4,5,3,12,2,7,11,11,11,11	yes	2.9e-39	0.08	NA	NA	NA	255	382	777	no	no	NA	NA	NA
Hordeum vulgare	HORVU1Hr1G083100.35	CNL	complete	HORVU1Hr1G083100.35:98	HORVU1Hr1G083100.35:1377	THHGQTVSVLPIVGPGGIGKTTFTQHLYNDSRTQEHFAVMVWVCVSTDFDVLKLTQQIHNCIPENETASETTNLDQLQKSIAQRLKSKRFLIVLDDIWKCNSEDEWKTLLAPFTKGEAKGSMVLVTTRFPKLAGMMKTINPVELQGLESNDFFTFFESCIFGEHKPRDYEDELGGIARDIARKLKGSPLAAKTVGRLLKKNLSREHWNGVL	no	16,1,6,4,5,3,12,2,7,11,11,11,11	yes	2.9e-39	0.08	NA	NA	NA	255	382	777	no	no	NA	NA	NA
Hordeum vulgare	HORVU1Hr1G083100.36	CNL	complete	HORVU1Hr1G083100.36:98	HORVU1Hr1G083100.36:1377	THHGQTVSVLPIVGPGGIGKTTFTQHLYNDSRTQEHFAVMVWVCVSTDFDVLKLTQQIHNCIPENETASETTNLDQLQKSIAQRLKSKRFLIVLDDIWKCNSEDEWKTLLAPFTKGEAKGSMVLVTTRFPKLAGMMKTINPVELQGLESNDFFTFFESCIFGEHKPRDYEDELGGIARDIARKLKGSPLAAKTVGRLLKKNLSREHWNGVL	no	16,1,6,4,5,3,12,2,7,11,11,11,11	yes	2.9e-39	0.08	NA	NA	NA	255	382	777	no	no	NA	NA	NA
Hordeum vulgare	HORVU1Hr1G083100.37	CNL	complete	HORVU1Hr1G083100.37:98	HORVU1Hr1G083100.37:1377	THHGQTVSVLPIVGPGGIGKTTFTQHLYNDSRTQEHFAVMVWVCVSTDFDVLKLTQQIHNCIPENETASETTNLDQLQKSIAQRLKSKRFLIVLDDIWKCNSEDEWKTLLAPFTKGEAKGSMVLVTTRFPKLAGMMKTINPVELQGLESNDFFTFFESCIFGEHKPRDYEDELGGIARDIARKLKGSPLAAKTVGRLLKKNLSREHWNGVL	no	16,1,6,4,5,3,12,2,7,11,11,11,11	yes	2.9e-39	0.08	NA	NA	NA	255	382	777	no	no	NA	NA	NA
Hordeum vulgare	HORVU1Hr1G083100.38	CNL	complete	HORVU1Hr1G083100.38:98	HORVU1Hr1G083100.38:1377	THHGQTVSVLPIVGPGGIGKTTFTQHLYNDSRTQEHFAVMVWVCVSTDFDVLKLTQQIHNCIPENETASETTNLDQLQKSIAQRLKSKRFLIVLDDIWKCNSEDEWKTLLAPFTKGEAKGSMVLVTTRFPKLAGMMKTINPVELQGLESNDFFTFFESCIFGEHKPRDYEDELGGIARDIARKLKGSPLAAKTVGRLLKKNLSREHWNGVL	no	16,1,6,4,5,3,12,2,7,11,11,11,11	yes	2.9e-39	0.08	NA	NA	NA	255	382	777	no	no	NA	NA	NA
Hordeum vulgare	HORVU1Hr1G083100.39	CNL	complete	HORVU1Hr1G083100.39:98	HORVU1Hr1G083100.39:1377	THHGQTVSVLPIVGPGGIGKTTFTQHLYNDSRTQEHFAVMVWVCVSTDFDVLKLTQQIHNCIPENETASETTNLDQLQKSIAQRLKSKRFLIVLDDIWKCNSEDEWKTLLAPFTKGEAKGSMVLVTTRFPKLAGMMKTINPVELQGLESNDFFTFFESCIFGEHKPRDYEDELGGIARDIARKLKGSPLAAKTVGRLLKKNLSREHWNGVL	no	16,1,6,4,5,3,12,2,7,11,11,11,11	yes	2.9e-39	0.08	NA	NA	NA	255	382	777	no	no	NA	NA	NA
Hordeum vulgare	HORVU1Hr1G083100.4	CNL	complete	HORVU1Hr1G083100.4:74	HORVU1Hr1G083100.4:1353	THHGQTVSVLPIVGPGGIGKTTFTQHLYNDSRTQEHFAVMVWVCVSTDFDVLKLTQQIHNCIPENETASETTNLDQLQKSIAQRLKSKRFLIVLDDIWKCNSEDEWKTLLAPFTKGEAKGSMVLVTTRFPKLAGMMKTINPVELQGLESNDFFTFFESCIFGEHKPRDYEDELGGIARDIARKLKGSPLAAKTVGRLLKKNLSREHWNGVL	no	16,1,6,4,5,3,12,2,7,11,11,11,11	yes	2.8e-39	0.07	NA	NA	NA	231	382	777	no	no	NA	NA	NA
Hordeum vulgare	HORVU1Hr1G083100.40	CNL	complete	HORVU1Hr1G083100.40:58	HORVU1Hr1G083100.40:1337	THHGQTVSVLPIVGPGGIGKTTFTQHLYNDSRTQEHFAVMVWVCVSTDFDVLKLTQQIHNCIPENETASETTNLDQLQKSIAQRLKSKRFLIVLDDIWKCNSEDEWKTLLAPFTKGEAKGSMVLVTTRFPKLAGMMKTINPVELQGLESNDFFTFFESCIFGEHKPRDYEDELGGIARDIARKLKGSPLAAKTVGRLLKKNLSREHWNGVL	no	16,1,6,4,5,3,12,2,7,11,11,11,11	yes	2.7e-39	0.076	NA	NA	NA	215	382	777	no	no	NA	NA	NA
Hordeum vulgare	HORVU1Hr1G083100.41	CNL	complete	HORVU1Hr1G083100.41:47	HORVU1Hr1G083100.41:1326	THHGQTVSVLPIVGPGGIGKTTFTQHLYNDSRTQEHFAVMVWVCVSTDFDVLKLTQQIHNCIPENETASETTNLDQLQKSIAQRLKSKRFLIVLDDIWKCNSEDEWKTLLAPFTKGEAKGSMVLVTTRFPKLAGMMKTINPVELQGLESNDFFTFFESCIFGEHKPRDYEDELGGIARDIARKLKGSPLAAKTVGRLLKKNLSREHWNGVL	no	16,1,6,4,5,3,12,2,7,11,11,11,11	yes	2.7e-39	0.23	NA	NA	NA	204	382	777	no	no	NA	NA	NA
Hordeum vulgare	HORVU1Hr1G083100.5	CNL	complete	HORVU1Hr1G083100.5:74	HORVU1Hr1G083100.5:1353	THHGQTVSVLPIVGPGGIGKTTFTQHLYNDSRTQEHFAVMVWVCVSTDFDVLKLTQQIHNCIPENETASETTNLDQLQKSIAQRLKSKRFLIVLDDIWKCNSEDEWKTLLAPFTKGEAKGSMVLVTTRFPKLAGMMKTINPVELQGLESNDFFTFFESCIFGEHKPRDYEDELGGIARDIARKLKGSPLAAKTVGRLLKKNLSREHWNGVL	no	16,1,6,4,5,3,12,2,7,11,11,11,11	yes	2.8e-39	0.07	NA	NA	NA	231	382	777	no	no	NA	NA	NA
Hordeum vulgare	HORVU1Hr1G083100.6	CNL	complete	HORVU1Hr1G083100.6:74	HORVU1Hr1G083100.6:1353	THHGQTVSVLPIVGPGGIGKTTFTQHLYNDSRTQEHFAVMVWVCVSTDFDVLKLTQQIHNCIPENETASETTNLDQLQKSIAQRLKSKRFLIVLDDIWKCNSEDEWKTLLAPFTKGEAKGSMVLVTTRFPKLAGMMKTINPVELQGLESNDFFTFFESCIFGEHKPRDYEDELGGIARDIARKLKGSPLAAKTVGRLLKKNLSREHWNGVL	no	16,1,6,4,5,3,12,2,7,11,11,11,11	yes	2.8e-39	0.07	NA	NA	NA	231	382	777	no	no	NA	NA	NA
Hordeum vulgare	HORVU1Hr1G083100.7	CNL	complete	HORVU1Hr1G083100.7:74	HORVU1Hr1G083100.7:1353	THHGQTVSVLPIVGPGGIGKTTFTQHLYNDSRTQEHFAVMVWVCVSTDFDVLKLTQQIHNCIPENETASETTNLDQLQKSIAQRLKSKRFLIVLDDIWKCNSEDEWKTLLAPFTKGEAKGSMVLVTTRFPKLAGMMKTINPVELQGLESNDFFTFFESCIFGEHKPRDYEDELGGIARDIARKLKGSPLAAKTVGRLLKKNLSREHWNGVL	no	16,1,6,4,5,3,12,2,7,11,11,11,11	yes	2.8e-39	0.07	NA	NA	NA	231	382	777	no	no	NA	NA	NA
Hordeum vulgare	HORVU1Hr1G083100.8	CNL	complete	HORVU1Hr1G083100.8:74	HORVU1Hr1G083100.8:1353	THHGQTVSVLPIVGPGGIGKTTFTQHLYNDSRTQEHFAVMVWVCVSTDFDVLKLTQQIHNCIPENETASETTNLDQLQKSIAQRLKSKRFLIVLDDIWKCNSEDEWKTLLAPFTKGEAKGSMVLVTTRFPKLAGMMKTINPVELQGLESNDFFTFFESCIFGEHKPRDYEDELGGIARDIARKLKGSPLAAKTVGRLLKKNLSREHWNGVL	no	16,1,6,4,5,3,12,2,7,11,11,11,11	yes	2.8e-39	0.07	NA	NA	NA	231	382	777	no	no	NA	NA	NA
Hordeum vulgare	HORVU1Hr1G083100.9	CNL	complete	HORVU1Hr1G083100.9:74	HORVU1Hr1G083100.9:1353	THHGQTVSVLPIVGPGGIGKTTFTQHLYNDSRTQEHFAVMVWVCVSTDFDVLKLTQQIHNCIPENETASETTNLDQLQKSIAQRLKSKRFLIVLDDIWKCNSEDEWKTLLAPFTKGEAKGSMVLVTTRFPKLAGMMKTINPVELQGLESNDFFTFFESCIFGEHKPRDYEDELGGIARDIARKLKGSPLAAKTVGRLLKKNLSREHWNGVL	no	16,1,6,4,5,3,12,2,7,11,11,11,11	yes	2.8e-39	0.07	NA	NA	NA	231	382	777	no	no	NA	NA	NA
Hordeum vulgare	HORVU1Hr1G083510.1	CNL	partial	HORVU1Hr1G083510.1:58	HORVU1Hr1G083510.1:438	CDKGDHLMVVGIVGVGGIGKTTLSKKVFNDEAMEGKFAKKIWLSITRDFNDVELLSTAITAAGGDLPGVGGARDRSLLVDALMNAIKDKKFFLVLDDMWGVNEWDKLLMTPFSYGSPGSRVLITTRHDTVARSMKVMYCHHVDKLGPIDAWSLLKKQVLTSGKNEPELDMLKDIGLQIIEKCDGLPLAIKVMGGLLCKKEKTRRDWEDVLN	no	17,16,1,6,4,5,10,3	NA	2.4e-45	NA	NA	NA	NA	NA	NA	NA	NA	NA	NA	NA	NA
Hordeum vulgare	HORVU1Hr1G083510.2	CNL	partial	HORVU1Hr1G083510.2:58	HORVU1Hr1G083510.2:395	CDKGDHLMVVGIVGVGGIGKTTLSKKVFNDEAMEGKFAKKIWLSITRDFNDVELLSTAITAAGGDLPGVGGARDRSLLVDALMNAIKDKKFFLVLDDMWGVNEWDKLLMTPFSYGSPGSRVLITTRHDTVARSMKVMYCHHVDKLGPIDAWSLLKKQVYSHQEKMNPSLT	no	17,16,1,6,4,5,10	NA	1.1e-31	NA	NA	NA	NA	NA	NA	NA	NA	NA	NA	NA	NA
Hordeum vulgare	HORVU1Hr1G083510.3	CNL	partial	HORVU1Hr1G083510.3:34	HORVU1Hr1G083510.3:650	NA	no	3,2,8,7,9,11,11,9,9,11,11,11,11,11	yes	2.2e-08	1.7e-06	NA	0.0075	NA	0	213	618	TRUE	no	NA	NA	NA
Hordeum vulgare	HORVU1Hr1G083510.4	NA	partial	HORVU1Hr1G083510.4:24	HORVU1Hr1G083510.4:545	NA	no	8,7,9,11,11,9,9,11,11,11,11,11	NA	NA	1.6e-06	NA	0.005	NA	NA	NA	NA	NA	NA	NA	NA	NA
Hordeum vulgare	HORVU1Hr1G083870.6	CNL	partial	HORVU1Hr1G083870.6:1	HORVU1Hr1G083870.6:893	SWIDDDPFNSAVPQVPNIGKLTLLQQLFNFSVEKQKGYELRQLRDMNELGGCLNVTNLENVTAKDEAIESNLHRKTHLESLHLGWIYMDDINVEDSLHLEILECLMPPPRLKGLTIQGYRSAKYPGWFLQDSYFENLETFKLVNCTALERLPTNVELFRNCCSLHLKDMPNLKTLPCLPAGLKMLSITNCPLLIFVSSDEPEQHDQWENIM	TRUE	10,3,2,8,7,9,9,1,11,11,11,9,11	yes	0.0024	0.00013	NA	NA	NA	0	210	723	TRUE	no	NA	NA	NA
Hordeum vulgare	HORVU1Hr1G083870.7	CNL	partial	HORVU1Hr1G083870.7:213	HORVU1Hr1G083870.7:528	EENSAICSGLAIVGAGGMGKSTLAQYVYNDKRVQEHFDVKMWVCISRKLDVDRHTREIIESVVGGECPRVGNLDPLQCKLRGLLQNKKFLLVLDDVWFEESGTEMEWEQLLRPLVCEQTGSKVLVTSRSNILPASLYCNKIVPLENMEDAEFLALFKNHAFSGAEVGEHSLRQKLEEIAEKLGTRLGRSPLAAKTVGLQLSRKKDITSWKD	no	1,6,4,5,10,3,2,8,7	NA	1.9e-35	NA	NA	NA	NA	NA	NA	NA	NA	NA	NA	NA	NA
Hordeum vulgare	HORVU1Hr1G084020.1	CNL	partial	HORVU1Hr1G084020.1:213	HORVU1Hr1G084020.1:528	EENSAICSGLAIVGAGGMGKSTLAQYVYNDKRVQEHFDVKMWVCISRKLDVDRHTREIIESVVGGECPRVGNLDPLQCKLRGLLQNKKFLLVLDDVWFEESGTEMEWEQLLRPLVCEQTGSKVLVTSRSNILPASLYCNKIVPLENMEDAEFLALFKNHAFSGAEVGEHSLRQKLEEIAEKLGTRLGRSPLAAKTVGLQLSRKKDITSWKD	no	1,6,4,5,10,3,2,8,7	NA	1.9e-35	NA	NA	NA	NA	NA	NA	NA	NA	NA	NA	NA	NA
Hordeum vulgare	HORVU1Hr1G084020.2	CNL	partial	HORVU1Hr1G084020.2:1	HORVU1Hr1G084020.2:892	SWIDDDPFNSAVPQVPNIGKLTLLQQLFNFSVEKQKGYELRQLRDMNELGGCLNVTNLENVTAKDEAIESNLHRKTHLESLHLGWIYMDDINVEDSLHLEILECLMPPPRLKGLTIQGYRSAKYPGWFLQDSYFENLETFKLVNCTALERLPTNVELFRNCCSLHLKDMPNLKTLPCLPAGLKMLSITNCPLLIFVSSDEPEQHDQWENIM	TRUE	10,3,2,8,7,9,9,1,11,11,11,9,11	yes	0.0024	0.003	NA	NA	NA	0	210	722	TRUE	no	NA	NA	NA
Hordeum vulgare	HORVU1Hr1G084200.1	CNL	partial	HORVU1Hr1G084200.1:26	HORVU1Hr1G084200.1:607	NA	no	4,5,10,3,12,2,8,7,9,9,11	NA	1.2e-28	0.00048	NA	NA	NA	NA	NA	NA	NA	NA	NA	NA	NA
Hordeum vulgare	HORVU1Hr1G084200.10	CNL	complete	HORVU1Hr1G084200.10:14	HORVU1Hr1G084200.10:875	RLATVGPRVLSMVGFGGVGKTTLATTVYNSPKLGGIQCRAFIPVSQTYDVRSLLESMLKQLLASAKKDKNDDPLKNIKDWDERDLFVKIKQHLADKRYLIILDDVWRAAAWDQLNVAIPRNNNQGSIIITTRSQEVAENCCTSSNIYKMNRLDKGDSEKLFFKTVFNPGQCPIDLLEVSKVILRRCNGLPLAIVSIGRMLARRQNQTPAEW	no	17,16,12,1,6,4,5,10,3,12,2,8,7,9,9,11	yes	1.7e-46	0.0011	NA	NA	NA	182	387	394	no	no	NA	NA	NA
Hordeum vulgare	HORVU1Hr1G084200.11	CNL	complete	HORVU1Hr1G084200.11:14	HORVU1Hr1G084200.11:875	RLATVGPRVLSMVGFGGVGKTTLATTVYNSPKLGGIQCRAFIPVSQTYDVRSLLESMLKQLLASAKKDKNDDPLKNIKDWDERDLFVKIKQHLADKRYLIILDDVWRAAAWDQLNVAIPRNNNQGSIIITTRSQEVAENCCTSSNIYKMNRLDKGDSEKLFFKTVFNPGQCPIDLLEVSKVILRRCNGLPLAIVSIGRMLARRQNQTPAEW	no	17,16,12,1,6,4,5,10,3,12,2,8,7,9,9,11	yes	1.9e-46	0.0015	NA	NA	NA	182	387	437	no	no	NA	NA	NA
Hordeum vulgare	HORVU1Hr1G084200.12	CNL	complete	HORVU1Hr1G084200.12:14	HORVU1Hr1G084200.12:875	RLATVGPRVLSMVGFGGVGKTTLATTVYNSPKLGGIQCRAFIPVSQTYDVRSLLESMLKQLLASAKKDKNDDPLKNIKDWDERDLFVKIKQHLADKRYLIILDDVWRAAAWDQLNVAIPRNNNQGSIIITTRSQEVAENCCTSSNIYKMNRLDKGDSEKLFFKTVFNPGQCPIDLLEVSKVILRRCNGLPLAIVSIGRMLARRQNQTPAEW	no	17,16,12,1,6,4,5,10,3,12,2,8,7,9,9,11	yes	1.9e-46	0.0015	NA	NA	NA	182	387	437	no	no	NA	NA	NA
Hordeum vulgare	HORVU1Hr1G084200.13	CNL	complete	HORVU1Hr1G084200.13:14	HORVU1Hr1G084200.13:875	RLATVGPRVLSMVGFGGVGKTTLATTVYNSPKLGGIQCRAFIPVSQTYDVRSLLESMLKQLLASAKKDKNDDPLKNIKDWDERDLFVKIKQHLADKRYLIILDDVWRAAAWDQLNVAIPRNNNQGSIIITTRSQEVAENCCTSSNIYKMNRLDKGDSEKLFFKTVFNPGQCPIDLLEVSKVILRRCNGLPLAIVSIGRMLARRQNQTPAEW	no	17,16,12,1,6,4,5,10,3,12,2,8,7,9,9,11	yes	1.9e-46	0.0015	NA	NA	NA	182	387	441	no	no	NA	NA	NA
Hordeum vulgare	HORVU1Hr1G084200.14	CNL	complete	HORVU1Hr1G084200.14:14	HORVU1Hr1G084200.14:875	RLATVGPRVLSMVGFGGVGKTTLATTVYNSPKLGGIQCRAFIPVSQTYDVRSLLESMLKQLLASAKKDKNDDPLKNIKDWDERDLFVKIKQHLADKRYLIILDDVWRAAAWDQLNVAIPRNNNQGSIIITTRSQEVAENCCTSSNIYKMNRLDKGDSEKLFFKTVFNPGQCPIDLLEVSKVILRRCNGLPLAIVSIGRMLARRQNQTPAEW	no	17,16,12,1,6,4,5,10,3,12,2,8,7,9,9,11	yes	1.7e-46	0.0011	NA	NA	NA	182	387	394	no	no	NA	NA	NA
Hordeum vulgare	HORVU1Hr1G084200.15	CNL	complete	HORVU1Hr1G084200.15:14	HORVU1Hr1G084200.15:875	RLATVGPRVLSMVGFGGVGKTTLATTVYNSPKLGGIQCRAFIPVSQTYDVRSLLESMLKQLLASAKKDKNDDPLKNIKDWDERDLFVKIKQHLADKRYLIILDDVWRAAAWDQLNVAIPRNNNQGSIIITTRSQEVAENCCTSSNIYKMNRLDKGDSEKLFFKTVFNPGQCPIDLLEVSKVILRRCNGLPLAIVSIGRMLARRQNQTPAEW	no	17,16,12,1,6,4,5,10,3,12,2,8,7,9,9,11	yes	1.9e-46	0.0015	NA	NA	NA	182	387	437	no	no	NA	NA	NA
Hordeum vulgare	HORVU1Hr1G084200.16	CNL	complete	HORVU1Hr1G084200.16:14	HORVU1Hr1G084200.16:875	RLATVGPRVLSMVGFGGVGKTTLATTVYNSPKLGGIQCRAFIPVSQTYDVRSLLESMLKQLLASAKKDKNDDPLKNIKDWDERDLFVKIKQHLADKRYLIILDDVWRAAAWDQLNVAIPRNNNQGSIIITTRSQEVAENCCTSSNIYKMNRLDKGDSEKLFFKTVFNPGQCPIDLLEVSKVILRRCNGLPLAIVSIGRMLARRQNQTPAEW	no	17,16,12,1,6,4,5,10,3,12,2,8,7,9,9,11	yes	1.7e-46	0.0011	NA	NA	NA	182	387	394	no	no	NA	NA	NA
Hordeum vulgare	HORVU1Hr1G084200.17	CNL	complete	HORVU1Hr1G084200.17:14	HORVU1Hr1G084200.17:875	RLATVGPRVLSMVGFGGVGKTTLATTVYNSPKLGGIQCRAFIPVSQTYDVRSLLESMLKQLLASAKKDKNDDPLKNIKDWDERDLFVKIKQHLADKRYLIILDDVWRAAAWDQLNVAIPRNNNQGSIIITTRSQEVAENCCTSSNIYKMNRLDKGDSEKLFFKTVFNPGQCPIDLLEVSKVILRRCNGLPLAIVSIGRMLARRQNQTPAEW	no	17,16,12,1,6,4,5,10,3,12,2,8,7,9,9,11	yes	1.8e-46	0.0011	NA	NA	NA	182	387	407	no	no	NA	NA	NA
Hordeum vulgare	HORVU1Hr1G084200.18	CNL	complete	HORVU1Hr1G084200.18:14	HORVU1Hr1G084200.18:875	RLATVGPRVLSMVGFGGVGKTTLATTVYNSPKLGGIQCRAFIPVSQTYDVRSLLESMLKQLLASAKKDKNDDPLKNIKDWDERDLFVKIKQHLADKRYLIILDDVWRAAAWDQLNVAIPRNNNQGSIIITTRSQEVAENCCTSSNIYKMNRLDKGDSEKLFFKTVFNPGQCPIDLLEVSKVILRRCNGLPLAIVSIGRMLARRQNQTPAEW	no	17,16,12,1,6,4,5,10,3,12,2,8,7,9,9,11	yes	1.9e-46	0.0015	NA	NA	NA	182	387	437	no	no	NA	NA	NA
Hordeum vulgare	HORVU1Hr1G084200.19	CNL	complete	HORVU1Hr1G084200.19:14	HORVU1Hr1G084200.19:875	RLATVGPRVLSMVGFGGVGKTTLATTVYNSPKLGGIQCRAFIPVSQTYDVRSLLESMLKQLLASAKKDKNDDPLKNIKDWDERDLFVKIKQHLADKRYLIILDDVWRAAAWDQLNVAIPRNNNQGSIIITTRSQEVAENCCTSSNIYKMNRLDKGDSEKLFFKTVFNPGQCPIDLLEVSKVILRRCNGLPLAIVSIGRMLARRQNQTPAEW	no	17,16,12,1,6,4,5,10,3,12,2,8,7,9,9,11	yes	1.9e-46	0.0015	NA	NA	NA	182	387	437	no	no	NA	NA	NA
Hordeum vulgare	HORVU1Hr1G084200.2	CNL	partial	HORVU1Hr1G084200.2:4	HORVU1Hr1G084200.2:531	NA	no	10,3,12,2,8,7,9,9,11	NA	9.3e-10	0.00037	NA	NA	NA	NA	NA	NA	NA	NA	NA	NA	NA
Hordeum vulgare	HORVU1Hr1G084200.20	CNL	complete	HORVU1Hr1G084200.20:14	HORVU1Hr1G084200.20:875	RLATVGPRVLSMVGFGGVGKTTLATTVYNSPKLGGIQCRAFIPVSQTYDVRSLLESMLKQLLASAKKDKNDDPLKNIKDWDERDLFVKIKQHLADKRYLIILDDVWRAAAWDQLNVAIPRNNNQGSIIITTRSQEVAENCCTSSNIYKMNRLDKGDSEKLFFKTVFNPGQCPIDLLEVSKVILRRCNGLPLAIVSIGRMLARRQNQTPAEW	no	17,16,12,1,6,4,5,10,3,12,2,8,7,9,9,11	yes	1.8e-46	0.0011	NA	NA	NA	182	387	397	no	no	NA	NA	NA
Hordeum vulgare	HORVU1Hr1G084200.21	CNL	complete	HORVU1Hr1G084200.21:14	HORVU1Hr1G084200.21:875	RLATVGPRVLSMVGFGGVGKTTLATTVYNSPKLGGIQCRAFIPVSQTYDVRSLLESMLKQLLASAKKDKNDDPLKNIKDWDERDLFVKIKQHLADKRYLIILDDVWRAAAWDQLNVAIPRNNNQGSIIITTRSQEVAENCCTSSNIYKMNRLDKGDSEKLFFKTVFNPGQCPIDLLEVSKVILRRCNGLPLAIVSIGRMLARRQNQTPAEW	no	17,16,12,1,6,4,5,10,3,12,2,8,7,9,9,11	yes	1.9e-46	0.0015	NA	NA	NA	182	387	437	no	no	NA	NA	NA
Hordeum vulgare	HORVU1Hr1G084200.22	CNL	complete	HORVU1Hr1G084200.22:14	HORVU1Hr1G084200.22:875	RLATVGPRVLSMVGFGGVGKTTLATTVYNSPKLGGIQCRAFIPVSQTYDVRSLLESMLKQLLASAKKDKNDDPLKNIKDWDERDLFVKIKQHLADKRYLIILDDVWRAAAWDQLNVAIPRNNNQGSIIITTRSQEVAENCCTSSNIYKMNRLDKGDSEKLFFKTVFNPGQCPIDLLEVSKVILRRCNGLPLAIVSIGRMLARRQNQTPAEW	no	17,16,12,1,6,4,5,10,3,12,2,8,7,9,9,11	yes	1.7e-46	0.0011	NA	NA	NA	182	387	394	no	no	NA	NA	NA
Hordeum vulgare	HORVU1Hr1G084200.23	CNL	complete	HORVU1Hr1G084200.23:14	HORVU1Hr1G084200.23:875	RLATVGPRVLSMVGFGGVGKTTLATTVYNSPKLGGIQCRAFIPVSQTYDVRSLLESMLKQLLASAKKDKNDDPLKNIKDWDERDLFVKIKQHLADKRYLIILDDVWRAAAWDQLNVAIPRNNNQGSIIITTRSQEVAENCCTSSNIYKMNRLDKGDSEKLFFKTVFNPGQCPIDLLEVSKVILRRCNGLPLAIVSIGRMLARRQNQTPAEW	no	17,16,12,1,6,4,5,10,3,12,2,8,7,9,9,11	yes	1.7e-46	0.0011	NA	NA	NA	182	387	394	no	no	NA	NA	NA
Hordeum vulgare	HORVU1Hr1G084200.24	CNL	complete	HORVU1Hr1G084200.24:14	HORVU1Hr1G084200.24:875	RLATVGPRVLSMVGFGGVGKTTLATTVYNSPKLGGIQCRAFIPVSQTYDVRSLLESMLKQLLASAKKDKNDDPLKNIKDWDERDLFVKIKQHLADKRYLIILDDVWRAAAWDQLNVAIPRNNNQGSIIITTRSQEVAENCCTSSNIYKMNRLDKGDSEKLFFKTVFNPGQCPIDLLEVSKVILRRCNGLPLAIVSIGRMLARRQNQTPAEW	no	17,16,12,1,6,4,5,10,3,12,2,8,7,9,9,11	yes	1.9e-46	0.0015	NA	NA	NA	182	387	437	no	no	NA	NA	NA
Hordeum vulgare	HORVU1Hr1G084200.25	CNL	partial	HORVU1Hr1G084200.25:29	HORVU1Hr1G084200.25:610	NA	no	4,5,10,3,12,2,8,7,9,9,11	NA	7.7e-30	0.00044	NA	NA	NA	NA	NA	NA	NA	NA	NA	NA	NA
Hordeum vulgare	HORVU1Hr1G084200.26	CNL	complete	HORVU1Hr1G084200.26:14	HORVU1Hr1G084200.26:875	RLATVGPRVLSMVGFGGVGKTTLATTVYNSPKLGGIQCRAFIPVSQTYDVRSLLESMLKQLLASAKKDKNDDPLKNIKDWDERDLFVKIKQHLADKRYLIILDDVWRAAAWDQLNVAIPRNNNQGSIIITTRSQEVAENCCTSSNIYKMNRLDKGDSEKLFFKTVFNPGQCPIDLLEVSKVILRRCNGLPLAIVSIGRMLARRQNQTPAEW	no	17,16,12,1,6,4,5,10,3,12,2,8,7,9,9,11	yes	1.9e-46	0.0015	NA	NA	NA	182	387	441	no	no	NA	NA	NA
Hordeum vulgare	HORVU1Hr1G084200.27	CNL	complete	HORVU1Hr1G084200.27:14	HORVU1Hr1G084200.27:875	RLATVGPRVLSMVGFGGVGKTTLATTVYNSPKLGGIQCRAFIPVSQTYDVRSLLESMLKQLLASAKKDKNDDPLKNIKDWDERDLFVKIKQHLADKRYLIILDDVWRAAAWDQLNVAIPRNNNQGSIIITTRSQEVAENCCTSSNIYKMNRLDKGDSEKLFFKTVFNPGQCPIDLLEVSKVILRRCNGLPLAIVSIGRMLARRQNQTPAEW	no	17,16,12,1,6,4,5,10,3,12,2,8,7,9,9,11	yes	1.7e-46	0.0011	NA	NA	NA	182	387	394	no	no	NA	NA	NA
Hordeum vulgare	HORVU1Hr1G084200.28	CNL	complete	HORVU1Hr1G084200.28:14	HORVU1Hr1G084200.28:875	RLATVGPRVLSMVGFGGVGKTTLATTVYNSPKLGGIQCRAFIPVSQTYDVRSLLESMLKQLLASAKKDKNDDPLKNIKDWDERDLFVKIKQHLADKRYLIILDDVWRAAAWDQLNVAIPRNNNQGSIIITTRSQEVAENCCTSSNIYKMNRLDKGDSEKLFFKTVFNPGQCPIDLLEVSKVILRRCNGLPLAIVSIGRMLARRQNQTPAEW	no	17,16,12,1,6,4,5,10,3,12,2,8,7,9,9,11	yes	1.7e-46	0.0011	NA	NA	NA	182	387	394	no	no	NA	NA	NA
Hordeum vulgare	HORVU1Hr1G084200.29	CNL	complete	HORVU1Hr1G084200.29:14	HORVU1Hr1G084200.29:875	RLATVGPRVLSMVGFGGVGKTTLATTVYNSPKLGGIQCRAFIPVSQTYDVRSLLESMLKQLLASAKKDKNDDPLKNIKDWDERDLFVKIKQHLADKRYLIILDDVWRAAAWDQLNVAIPRNNNQGSIIITTRSQEVAENCCTSSNIYKMNRLDKGDSEKLFFKTVFNPGQCPIDLLEVSKVILRRCNGLPLAIVSIGRMLARRQNQTPAEW	no	17,16,12,1,6,4,5,10,3,12,2,8,7,9,9,11	yes	1.7e-46	0.0011	NA	NA	NA	182	387	395	no	no	NA	NA	NA
Hordeum vulgare	HORVU1Hr1G084200.3	CNL	partial	HORVU1Hr1G084200.3:4	HORVU1Hr1G084200.3:531	NA	no	10,3,12,2,8,7,9,9,11	NA	9.4e-10	0.00039	NA	NA	NA	NA	NA	NA	NA	NA	NA	NA	NA
Hordeum vulgare	HORVU1Hr1G084200.30	CNL	complete	HORVU1Hr1G084200.30:14	HORVU1Hr1G084200.30:875	RLATVGPRVLSMVGFGGVGKTTLATTVYNSPKLGGIQCRAFIPVSQTYDVRSLLESMLKQLLASAKKDKNDDPLKNIKDWDERDLFVKIKQHLADKRYLIILDDVWRAAAWDQLNVAIPRNNNQGSIIITTRSQEVAENCCTSSNIYKMNRLDKGDSEKLFFKTVFNPGQCPIDLLEVSKVILRRCNGLPLAIVSIGRMLARRQNQTPAEW	no	17,16,12,1,6,4,5,10,3,12,2,8,7,9,9,11	yes	1.7e-46	0.0011	NA	NA	NA	182	387	394	no	no	NA	NA	NA
Hordeum vulgare	HORVU1Hr1G084200.31	CNL	complete	HORVU1Hr1G084200.31:18	HORVU1Hr1G084200.31:820	RLATVGPRVLSMVGFGGVGKTTLATTVYNSPKLGGIQCRAFIPVSQTYDVRSLLESMLKQLLASAKKDKNDDPLKNIKDWDERDLFVKIKQHLADKRYLIILDDVWRAAAWDQLNVAIPRNNNQGSIIITTRSQEVAENCCTSSNIYKMNRLDKGDSEKLFFKTVFNPGQCPIDLLEVSKVILRRCNGLPLAIVSIGRMLARRQNQTPAEW	no	16,12,1,6,4,5,10,3,12,2,8,7,9,9,11	yes	1.7e-46	0.0013	NA	NA	NA	127	387	394	no	no	NA	NA	NA
Hordeum vulgare	HORVU1Hr1G084200.32	CNL	complete	HORVU1Hr1G084200.32:14	HORVU1Hr1G084200.32:875	RLATVGPRVLSMVGFGGVGKTTLATTVYNSPKLGGIQCRAFIPVSQTYDVRSLLESMLKQLLASAKKDKNDDPLKNIKDWDERDLFVKIKQHLADKRYLIILDDVWRAAAWDQLNVAIPRNNNQGSIIITTRSQEVAENCCTSSNIYKMNRLDKGDSEKLFFKTVFNPGQCPIDLLEVSKVILRRCNGLPLAIVSIGRMLARRQNQTPAEW	no	17,16,12,1,6,4,5,10,3,12,2,8,7,9,9,11	yes	1.7e-46	0.0011	NA	NA	NA	182	387	394	no	no	NA	NA	NA
Hordeum vulgare	HORVU1Hr1G084200.33	CNL	partial	HORVU1Hr1G084200.33:29	HORVU1Hr1G084200.33:610	NA	no	4,5,10,3,12,2,8,7,9,9,11	NA	1.7e-28	0.00044	NA	NA	NA	NA	NA	NA	NA	NA	NA	NA	NA
Hordeum vulgare	HORVU1Hr1G084200.34	CNL	complete	HORVU1Hr1G084200.34:14	HORVU1Hr1G084200.34:875	RLATVGPRVLSMVGFGGVGKTTLATTVYNSPKLGGIQCRAFIPVSQTYDVRSLLESMLKQLLASAKKDKNDDPLKNIKDWDERDLFVKIKQHLADKRYLIILDDVWRAAAWDQLNVAIPRNNNQGSIIITTRSQEVAENCCTSSNIYKMNRLDKGDSEKLFFKTVFNPGQCPIDLLEVSKVILRRCNGLPLAIVSIGRMLARRQNQTPAEW	no	17,16,12,1,6,4,5,10,3,12,2,8,7,9,9,11	yes	1.7e-46	0.0011	NA	NA	NA	182	387	394	no	no	NA	NA	NA
Hordeum vulgare	HORVU1Hr1G084200.35	CNL	complete	HORVU1Hr1G084200.35:14	HORVU1Hr1G084200.35:875	RLATVGPRVLSMVGFGGVGKTTLATTVYNSPKLGGIQCRAFIPVSQTYDVRSLLESMLKQLLASAKKDKNDDPLKNIKDWDERDLFVKIKQHLADKRYLIILDDVWRAAAWDQLNVAIPRNNNQGSIIITTRSQEVAENCCTSSNIYKMNRLDKGDSEKLFFKTVFNPGQCPIDLLEVSKVILRRCNGLPLAIVSIGRMLARRQNQTPAEW	no	17,16,12,1,6,4,5,10,3,12,2,8,7,9,9,11	yes	1.9e-46	0.0015	NA	NA	NA	182	387	437	no	no	NA	NA	NA
Hordeum vulgare	HORVU1Hr1G084200.36	CNL	complete	HORVU1Hr1G084200.36:14	HORVU1Hr1G084200.36:875	RLATVGPRVLSMVGFGGVGKTTLATTVYNSPKLGGIQCRAFIPVSQTYDVRSLLESMLKQLLASAKKDKNDDPLKNIKDWDERDLFVKIKQHLADKRYLIILDDVWRAAAWDQLNVAIPRNNNQGSIIITTRSQEVAENCCTSSNIYKMNRLDKGDSEKLFFKTVFNPGQCPIDLLEVSKVILRRCNGLPLAIVSIGRMLARRQNQTPAEW	no	17,16,12,1,6,4,5,10,3,12,2,8,7,9,9,11	yes	1.9e-46	0.0015	NA	NA	NA	182	387	437	no	no	NA	NA	NA
Hordeum vulgare	HORVU1Hr1G084200.37	CNL	complete	HORVU1Hr1G084200.37:14	HORVU1Hr1G084200.37:875	RLATVGPRVLSMVGFGGVGKTTLATTVYNSPKLGGIQCRAFIPVSQTYDVRSLLESMLKQLLASAKKDKNDDPLKNIKDWDERDLFVKIKQHLADKRYLIILDDVWRAAAWDQLNVAIPRNNNQGSIIITTRSQEVAENCCTSSNIYKMNRLDKGDSEKLFFKTVFNPGQCPIDLLEVSKVILRRCNGLPLAIVSIGRMLARRQNQTPAEW	no	17,16,12,1,6,4,5,10,3,12,2,8,7,9,9,11	yes	1.9e-46	0.0015	NA	NA	NA	182	387	448	no	no	yes	NA	NA
Hordeum vulgare	HORVU1Hr1G084200.38	CNL	complete	HORVU1Hr1G084200.38:14	HORVU1Hr1G084200.38:875	RLATVGPRVLSMVGFGGVGKTTLATTVYNSPKLGGIQCRAFIPVSQTYDVRSLLESMLKQLLASAKKDKNDDPLKNIKDWDERDLFVKIKQHLADKRYLIILDDVWRAAAWDQLNVAIPRNNNQGSIIITTRSQEVAENCCTSSNIYKMNRLDKGDSEKLFFKTVFNPGQCPIDLLEVSKVILRRCNGLPLAIVSIGRMLARRQNQTPAEW	no	17,16,12,1,6,4,5,10,3,12,2,8,7,9,9,11	yes	1.7e-46	0.0011	NA	NA	NA	182	387	394	no	no	NA	NA	NA
Hordeum vulgare	HORVU1Hr1G084200.39	CNL	complete	HORVU1Hr1G084200.39:14	HORVU1Hr1G084200.39:875	RLATVGPRVLSMVGFGGVGKTTLATTVYNSPKLGGIQCRAFIPVSQTYDVRSLLESMLKQLLASAKKDKNDDPLKNIKDWDERDLFVKIKQHLADKRYLIILDDVWRAAAWDQLNVAIPRNNNQGSIIITTRSQEVAENCCTSSNIYKMNRLDKGDSEKLFFKTVFNPGQCPIDLLEVSKVILRRCNGLPLAIVSIGRMLARRQNQTPAEW	no	17,16,12,1,6,4,5,10,3,12,2,8,7,9,9,11	yes	1.9e-46	0.0015	NA	NA	NA	182	387	437	no	no	NA	NA	NA
Hordeum vulgare	HORVU1Hr1G084200.4	CNL	complete	HORVU1Hr1G084200.4:14	HORVU1Hr1G084200.4:875	RLATVGPRVLSMVGFGGVGKTTLATTVYNSPKLGGIQCRAFIPVSQTYDVRSLLESMLKQLLASAKKDKNDDPLKNIKDWDERDLFVKIKQHLADKRYLIILDDVWRAAAWDQLNVAIPRNNNQGSIIITTRSQEVAENCCTSSNIYKMNRLDKGDSEKLFFKTVFNPGQCPIDLLEVSKVILRRCNGLPLAIVSIGRMLARRQNQTPAEW	no	17,16,12,1,6,4,5,10,3,12,2,8,7,9,9,11	yes	1.9e-46	0.0015	NA	NA	NA	182	387	437	no	no	NA	NA	NA
Hordeum vulgare	HORVU1Hr1G084200.40	CNL	complete	HORVU1Hr1G084200.40:18	HORVU1Hr1G084200.40:820	RLATVGPRVLSMVGFGGVGKTTLATTVYNSPKLGGIQCRAFIPVSQTYDVRSLLESMLKQLLASAKKDKNDDPLKNIKDWDERDLFVKIKQHLADKRYLIILDDVWRAAAWDQLNVAIPRNNNQGSIIITTRSQEVAENCCTSSNIYKMNRLDKGDSEKLFFKTVFNPGQCPIDLLEVSKVILRRCNGLPLAIVSIGRMLARRQNQTPAEW	no	16,12,1,6,4,5,10,3,12,2,8,7,9,9,11	yes	1.7e-46	0.0014	NA	NA	NA	127	387	407	no	no	NA	NA	NA
Hordeum vulgare	HORVU1Hr1G084200.41	CNL	complete	HORVU1Hr1G084200.41:14	HORVU1Hr1G084200.41:875	RLATVGPRVLSMVGFGGVGKTTLATTVYNSPKLGGIQCRAFIPVSQTYDVRSLLESMLKQLLASAKKDKNDDPLKNIKDWDERDLFVKIKQHLADKRYLIILDDVWRAAAWDQLNVAIPRNNNQGSIIITTRSQEVAENCCTSSNIYKMNRLDKGDSEKLFFKTVFNPGQCPIDLLEVSKVILRRCNGLPLAIVSIGRMLARRQNQTPAEW	no	17,16,12,1,6,4,5,10,3,12,2,8,7,9,9,11	yes	1.8e-46	0.0011	NA	NA	NA	182	387	407	no	no	NA	NA	NA
Hordeum vulgare	HORVU1Hr1G084200.42	CNL	complete	HORVU1Hr1G084200.42:14	HORVU1Hr1G084200.42:875	RLATVGPRVLSMVGFGGVGKTTLATTVYNSPKLGGIQCRAFIPVSQTYDVRSLLESMLKQLLASAKKDKNDDPLKNIKDWDERDLFVKIKQHLADKRYLIILDDVWRAAAWDQLNVAIPRNNNQGSIIITTRSQEVAENCCTSSNIYKMNRLDKGDSEKLFFKTVFNPGQCPIDLLEVSKVILRRCNGLPLAIVSIGRMLARRQNQTPAEW	no	17,16,12,1,6,4,5,10,3,12,2,8,7,9,9,11	yes	1.8e-46	0.0011	NA	NA	NA	182	387	407	no	no	NA	NA	NA
Hordeum vulgare	HORVU1Hr1G084200.43	CNL	complete	HORVU1Hr1G084200.43:14	HORVU1Hr1G084200.43:875	RLATVGPRVLSMVGFGGVGKTTLATTVYNSPKLGGIQCRAFIPVSQTYDVRSLLESMLKQLLASAKKDKNDDPLKNIKDWDERDLFVKIKQHLADKRYLIILDDVWRAAAWDQLNVAIPRNNNQGSIIITTRSQEVAENCCTSSNIYKMNRLDKGDSEKLFFKTVFNPGQCPIDLLEVSKVILRRCNGLPLAIVSIGRMLARRQNQTPAEW	no	17,16,12,1,6,4,5,10,3,12,2,8,7,9,9,11	yes	1.8e-46	0.0011	NA	NA	NA	182	387	407	no	no	NA	NA	NA
Hordeum vulgare	HORVU1Hr1G084200.44	CNL	complete	HORVU1Hr1G084200.44:14	HORVU1Hr1G084200.44:875	RLATVGPRVLSMVGFGGVGKTTLATTVYNSPKLGGIQCRAFIPVSQTYDVRSLLESMLKQLLASAKKDKNDDPLKNIKDWDERDLFVKIKQHLADKRYLIILDDVWRAAAWDQLNVAIPRNNNQGSIIITTRSQEVAENCCTSSNIYKMNRLDKGDSEKLFFKTVFNPGQCPIDLLEVSKVILRRCNGLPLAIVSIGRMLARRQNQTPAEW	no	17,16,12,1,6,4,5,10,3,12,2,8,7,9,9,11	yes	1.8e-46	0.0011	NA	NA	NA	182	387	407	no	no	NA	NA	NA
Hordeum vulgare	HORVU1Hr1G084200.45	CNL	complete	HORVU1Hr1G084200.45:14	HORVU1Hr1G084200.45:875	RLATVGPRVLSMVGFGGVGKTTLATTVYNSPKLGGIQCRAFIPVSQTYDVRSLLESMLKQLLASAKKDKNDDPLKNIKDWDERDLFVKIKQHLADKRYLIILDDVWRAAAWDQLNVAIPRNNNQGSIIITTRSQEVAENCCTSSNIYKMNRLDKGDSEKLFFKTVFNPGQCPIDLLEVSKVILRRCNGLPLAIVSIGRMLARRQNQTPAEW	no	17,16,12,1,6,4,5,10,3,12,2,8,7,9,9,11	yes	1.8e-46	0.0011	NA	NA	NA	182	387	407	no	no	NA	NA	NA
Hordeum vulgare	HORVU1Hr1G084200.46	CNL	complete	HORVU1Hr1G084200.46:14	HORVU1Hr1G084200.46:875	RLATVGPRVLSMVGFGGVGKTTLATTVYNSPKLGGIQCRAFIPVSQTYDVRSLLESMLKQLLASAKKDKNDDPLKNIKDWDERDLFVKIKQHLADKRYLIILDDVWRAAAWDQLNVAIPRNNNQGSIIITTRSQEVAENCCTSSNIYKMNRLDKGDSEKLFFKTVFNPGQCPIDLLEVSKVILRRCNGLPLAIVSIGRMLARRQNQTPAEW	no	17,16,12,1,6,4,5,10,3,12,2,8,7,9,9,11	yes	1.8e-46	0.0011	NA	NA	NA	182	387	407	no	no	NA	NA	NA
Hordeum vulgare	HORVU1Hr1G084200.47	CNL	complete	HORVU1Hr1G084200.47:14	HORVU1Hr1G084200.47:875	RLATVGPRVLSMVGFGGVGKTTLATTVYNSPKLGGIQCRAFIPVSQTYDVRSLLESMLKQLLASAKKDKNDDPLKNIKDWDERDLFVKIKQHLADKRYLIILDDVWRAAAWDQLNVAIPRNNNQGSIIITTRSQEVAENCCTSSNIYKMNRLDKGDSEKLFFKTVFNPGQCPIDLLEVSKVILRRCNGLPLAIVSIGRMLARRQNQTPAEW	no	17,16,12,1,6,4,5,10,3,12,2,8,7,9,9,11	yes	1.8e-46	0.0011	NA	NA	NA	182	387	407	no	no	NA	NA	NA
Hordeum vulgare	HORVU1Hr1G084200.48	CNL	complete	HORVU1Hr1G084200.48:14	HORVU1Hr1G084200.48:875	RLATVGPRVLSMVGFGGVGKTTLATTVYNSPKLGGIQCRAFIPVSQTYDVRSLLESMLKQLLASAKKDKNDDPLKNIKDWDERDLFVKIKQHLADKRYLIILDDVWRAAAWDQLNVAIPRNNNQGSIIITTRSQEVAENCCTSSNIYKMNRLDKGDSEKLFFKTVFNPGQCPIDLLEVSKVILRRCNGLPLAIVSIGRMLARRQNQTPAEW	no	17,16,12,1,6,4,5,10,3,12,2,8,7,9,9,11	yes	1.8e-46	0.0011	NA	NA	NA	182	387	407	no	no	NA	NA	NA
Hordeum vulgare	HORVU1Hr1G084200.49	CNL	complete	HORVU1Hr1G084200.49:14	HORVU1Hr1G084200.49:875	RLATVGPRVLSMVGFGGVGKTTLATTVYNSPKLGGIQCRAFIPVSQTYDVRSLLESMLKQLLASAKKDKNDDPLKNIKDWDERDLFVKIKQHLADKRYLIILDDVWRAAAWDQLNVAIPRNNNQGSIIITTRSQEVAENCCTSSNIYKMNRLDKGDSEKLFFKTVFNPGQCPIDLLEVSKVILRRCNGLPLAIVSIGRMLARRQNQTPAEW	no	17,16,12,1,6,4,5,10,3,12,2,8,7,9,9,11	yes	1.8e-46	0.0011	NA	NA	NA	182	387	407	no	no	NA	NA	NA
Hordeum vulgare	HORVU1Hr1G084200.5	CNL	partial	HORVU1Hr1G084200.5:4	HORVU1Hr1G084200.5:531	NA	no	10,3,12,2,8,7,9,9,11	NA	8.3e-10	0.00026	NA	NA	NA	NA	NA	NA	NA	NA	NA	NA	NA
Hordeum vulgare	HORVU1Hr1G084200.50	CNL	partial	HORVU1Hr1G084200.50:4	HORVU1Hr1G084200.50:531	NA	no	10,3,12,2,8,7,9,9,11	NA	8.6e-10	0.00029	NA	NA	NA	NA	NA	NA	NA	NA	NA	NA	NA
Hordeum vulgare	HORVU1Hr1G084200.51	CNL	complete	HORVU1Hr1G084200.51:14	HORVU1Hr1G084200.51:875	RLATVGPRVLSMVGFGGVGKTTLATTVYNSPKLGGIQCRAFIPVSQTYDVRSLLESMLKQLLASAKKDKNDDPLKNIKDWDERDLFVKIKQHLADKRYLIILDDVWRAAAWDQLNVAIPRNNNQGSIIITTRSQEVAENCCTSSNIYKMNRLDKGDSEKLFFKTVFNPGQCPIDLLEVSKVILRRCNGLPLAIVSIGRMLARRQNQTPAEW	no	17,16,12,1,6,4,5,10,3,12,2,8,7,9,9,11	yes	1.8e-46	0.0011	NA	NA	NA	182	387	407	no	no	NA	NA	NA
Hordeum vulgare	HORVU1Hr1G084200.52	CNL	complete	HORVU1Hr1G084200.52:14	HORVU1Hr1G084200.52:875	RLATVGPRVLSMVGFGGVGKTTLATTVYNSPKLGGIQCRAFIPVSQTYDVRSLLESMLKQLLASAKKDKNDDPLKNIKDWDERDLFVKIKQHLADKRYLIILDDVWRAAAWDQLNVAIPRNNNQGSIIITTRSQEVAENCCTSSNIYKMNRLDKGDSEKLFFKTVFNPGQCPIDLLEVSKVILRRCNGLPLAIVSIGRMLARRQNQTPAEW	no	17,16,12,1,6,4,5,10,3,12,2,8,7,9,9,11	yes	1.8e-46	0.0011	NA	NA	NA	182	387	402	no	no	NA	NA	NA
Hordeum vulgare	HORVU1Hr1G084200.53	CNL	complete	HORVU1Hr1G084200.53:14	HORVU1Hr1G084200.53:875	RLATVGPRVLSMVGFGGVGKTTLATTVYNSPKLGGIQCRAFIPVSQTYDVRSLLESMLKQLLASAKKDKNDDPLKNIKDWDERDLFVKIKQHLADKRYLIILDDVWRAAAWDQLNVAIPRNNNQGSIIITTRSQEVAENCCTSSNIYKMNRLDKGDSEKLFFKTVFNPGQCPIDLLEVSKVILRRCNGLPLAIVSIGRMLARRQNQTPAEW	no	17,16,12,1,6,4,5,10,3,12,2,8,7,9,9,11	yes	1.7e-46	0.0011	NA	NA	NA	182	387	395	no	no	NA	NA	NA
Hordeum vulgare	HORVU1Hr1G084200.54	CNL	complete	HORVU1Hr1G084200.54:14	HORVU1Hr1G084200.54:875	RLATVGPRVLSMVGFGGVGKTTLATTVYNSPKLGGIQCRAFIPVSQTYDVRSLLESMLKQLLASAKKDKNDDPLKNIKDWDERDLFVKIKQHLADKRYLIILDDVWRAAAWDQLNVAIPRNNNQGSIIITTRSQEVAENCCTSSNIYKMNRLDKGDSEKLFFKTVFNPGQCPIDLLEVSKVILRRCNGLPLAIVSIGRMLARRQNQTPAEW	no	17,16,12,1,6,4,5,10,3,12,2,8,7,9,9,11	yes	1.8e-46	0.0011	NA	NA	NA	182	387	398	no	no	NA	NA	NA
Hordeum vulgare	HORVU1Hr1G084200.55	CNL	complete	HORVU1Hr1G084200.55:14	HORVU1Hr1G084200.55:875	RLATVGPRVLSMVGFGGVGKTTLATTVYNSPKLGGIQCRAFIPVSQTYDVRSLLESMLKQLLASAKKDKNDDPLKNIKDWDERDLFVKIKQHLADKRYLIILDDVWRAAAWDQLNVAIPRNNNQGSIIITTRSQEVAENCCTSSNIYKMNRLDKGDSEKLFFKTVFNPGQCPIDLLEVSKVILRRCNGLPLAIVSIGRMLARRQNQTPAEW	no	17,16,12,1,6,4,5,10,3,12,2,8,7,9,9,11	yes	1.8e-46	0.0011	NA	NA	NA	182	387	402	no	no	NA	NA	NA
Hordeum vulgare	HORVU1Hr1G084200.56	CNL	partial	HORVU1Hr1G084200.56:4	HORVU1Hr1G084200.56:531	NA	no	10,3,12,2,8,7,9,9,11	NA	8.3e-10	0.00026	NA	NA	NA	NA	NA	NA	NA	NA	NA	NA	NA
Hordeum vulgare	HORVU1Hr1G084200.57	CNL	partial	HORVU1Hr1G084200.57:30	HORVU1Hr1G084200.57:611	NA	no	4,5,10,3,12,2,8,7,9,9,11	NA	1.1e-29	0.00043	NA	NA	NA	NA	NA	NA	NA	NA	NA	NA	NA
Hordeum vulgare	HORVU1Hr1G084200.6	CNL	complete	HORVU1Hr1G084200.6:14	HORVU1Hr1G084200.6:875	RLATVGPRVLSMVGFGGVGKTTLATTVYNSPKLGGIQCRAFIPVSQTYDVRSLLESMLKQLLASAKKDKNDDPLKNIKDWDERDLFVKIKQHLADKRYLIILDDVWRAAAWDQLNVAIPRNNNQGSIIITTRSQEVAENCCTSSNIYKMNRLDKGDSEKLFFKTVFNPGQCPIDLLEVSKVILRRCNGLPLAIVSIGRMLARRQNQTPAEW	no	17,16,12,1,6,4,5,10,3,12,2,8,7,9,9,11	yes	1.7e-46	0.0011	NA	NA	NA	182	387	394	no	no	NA	NA	NA
Hordeum vulgare	HORVU1Hr1G084200.7	CNL	complete	HORVU1Hr1G084200.7:14	HORVU1Hr1G084200.7:875	RLATVGPRVLSMVGFGGVGKTTLATTVYNSPKLGGIQCRAFIPVSQTYDVRSLLESMLKQLLASAKKDKNDDPLKNIKDWDERDLFVKIKQHLADKRYLIILDDVWRAAAWDQLNVAIPRNNNQGSIIITTRSQEVAENCCTSSNIYKMNRLDKGDSEKLFFKTVFNPGQCPIDLLEVSKVILRRCNGLPLAIVSIGRMLARRQNQTPAEW	no	17,16,12,1,6,4,5,10,3,12,2,8,7,9,9,11	yes	1.9e-46	0.0015	NA	NA	NA	182	387	437	no	no	NA	NA	NA
Hordeum vulgare	HORVU1Hr1G084200.8	CNL	complete	HORVU1Hr1G084200.8:14	HORVU1Hr1G084200.8:875	RLATVGPRVLSMVGFGGVGKTTLATTVYNSPKLGGIQCRAFIPVSQTYDVRSLLESMLKQLLASAKKDKNDDPLKNIKDWDERDLFVKIKQHLADKRYLIILDDVWRAAAWDQLNVAIPRNNNQGSIIITTRSQEVAENCCTSSNIYKMNRLDKGDSEKLFFKTVFNPGQCPIDLLEVSKVILRRCNGLPLAIVSIGRMLARRQNQTPAEW	no	17,16,12,1,6,4,5,10,3,12,2,8,7,9,9,11	yes	1.7e-46	0.0011	NA	NA	NA	182	387	394	no	no	NA	NA	NA
Hordeum vulgare	HORVU1Hr1G084200.9	CNL	complete	HORVU1Hr1G084200.9:14	HORVU1Hr1G084200.9:875	RLATVGPRVLSMVGFGGVGKTTLATTVYNSPKLGGIQCRAFIPVSQTYDVRSLLESMLKQLLASAKKDKNDDPLKNIKDWDERDLFVKIKQHLADKRYLIILDDVWRAAAWDQLNVAIPRNNNQGSIIITTRSQEVAENCCTSSNIYKMNRLDKGDSEKLFFKTVFNPGQCPIDLLEVSKVILRRCNGLPLAIVSIGRMLARRQNQTPAEW	no	17,16,12,1,6,4,5,10,3,12,2,8,7,9,9,11	yes	1.9e-46	0.0015	NA	NA	NA	182	387	437	no	no	NA	NA	NA
Hordeum vulgare	HORVU1Hr1G085960.1	NA	partial	HORVU1Hr1G085960.1:79	HORVU1Hr1G085960.1:773	NA	no	9,9,9,11,11,11,11,11,11,11,9,11,11,11,11,11,11,11,11,11	yes	NA	3.2e-30	0.17	7.5e-09	NA	NA	NA	NA	NA	NA	NA	NA	NA
Hordeum vulgare	HORVU1Hr1G085960.10	CNL	partial	HORVU1Hr1G085960.10:40	HORVU1Hr1G085960.10:487	MGVQEDISIVPIVGLGGLGKSTLAESVFVDKMVNDFEVRAWVHVSKEFDLHKIGSAILKSINSSINLDNCSLQFLQENLRNELADRRYLIVLDDLWEENADKLERLKQMLQHGHRGSRVIVTTRNQSVVNKLGTGVLAHKRKICLVPNSDQIKLHVLSNDDCWEVMKQTAFGPDDDKSDLEEIGRKIAEKCGGVPLVAIALGQVMSELRTV	no	17,16,1,6,4,5,10,3,2	NA	1.2e-47	NA	NA	NA	NA	NA	NA	NA	NA	NA	NA	NA	NA
Hordeum vulgare	HORVU1Hr1G085960.11	CNL	partial	HORVU1Hr1G085960.11:119	HORVU1Hr1G085960.11:1200	MGVQEDISIVPIVGLGGLGKSTLAESVFVDKMVNDFEVRAWVHVSKEFDLHKIGSAILKSINSSINLDNCSLQFLQENLRNELADRRYLIVLDDLWEENADKLERLKQMLQHGHRGSRVIVTTRNQSVVNKLGTGVLAHKRKICLVPNSDQIKLHVLSNDDCWEVMKQTAFGPDDDKSDLEEIGRKIAEKCGGVPLVAIALGQVMSELRTV	no	1,6,4,5,10,3,2,7,9,9,9,11,11,11,11,11,11,11,9,11,11,11,11,11,11,11,11,11	yes	8.2e-47	6.6e-29	NA	0.0002	NA	94	386	788	no	no	NA	NA	NA
Hordeum vulgare	HORVU1Hr1G085960.12	CNL	partial	HORVU1Hr1G085960.12:119	HORVU1Hr1G085960.12:1200	MGVQEDISIVPIVGLGGLGKSTLAESVFVDKMVNDFEVRAWVHVSKEFDLHKIGSAILKSINSSINLDNCSLQFLQENLRNELADRRYLIVLDDLWEENADKLERLKQMLQHGHRGSRVIVTTRNQSVVNKLGTGVLAHKRKICLVPNSDQIKLHVLSNDDCWEVMKQTAFGPDDDKSDLEEIGRKIAEKCGGVPLVAIALGQVMSELRTV	no	1,6,4,5,10,3,2,7,9,9,9,11,11,11,11,11,11,11,9,11,11,11,11,11,11,11,11,11	yes	8.1e-47	6.4e-29	NA	0.00018	NA	94	386	786	no	no	NA	NA	NA
Hordeum vulgare	HORVU1Hr1G085960.13	CNL	partial	HORVU1Hr1G085960.13:34	HORVU1Hr1G085960.13:481	MGVQEDISIVPIVGLGGLGKSTLAESVFVDKMVNDFEVRAWVHVSKEFDLHKIGSAILKSINSSINLDNCSLQFLQENLRNELADRRYLIVLDDLWEENADKLERLKQMLQHGHRGSRVIVTTRNQSVVNKLGTGVLAHKRKICLVPNSDQIKLHVLSNDDCWEVMKQTAFGPDDDKSDLEEIGRKIAEKCGGVPLVAIALGQVMSELRTV	no	17,16,1,6,4,5,10,3,2	NA	1.1e-47	NA	NA	NA	NA	NA	NA	NA	NA	NA	NA	NA	NA
Hordeum vulgare	HORVU1Hr1G085960.14	CNL	partial	HORVU1Hr1G085960.14:79	HORVU1Hr1G085960.14:344	MGVQEDISIVPIVGLGGLGKSTLAESVFVDKMVNDFEVRAWVHVSKEFDLHKIGSAILKSINSSINLDNCSLQFLQENLRNELADRRYLIVLDDLWEENADKLERLKQMLQHGHRGSRVIVTTRNQSVVNKLGTGVLAHKRKICLVPNSDQIKLHVLSNDDCWEVMKQTAFGPDDDKSDLEEIGRKIAEKCGGVPLVAIALGQVMSELRTV	no	1,6,4,5,10,3,2	NA	4.9e-48	NA	NA	NA	NA	NA	NA	NA	NA	NA	NA	NA	NA
Hordeum vulgare	HORVU1Hr1G085960.15	CNL	partial	HORVU1Hr1G085960.15:27	HORVU1Hr1G085960.15:474	MGVQEDISIVPIVGLGGLGKSTLAESVFVDKMVNDFEVRAWVHVSKEFDLHKIGSAILKSINSSINLDNCSLQFLQENLRNELADRRYLIVLDDLWEENADKLERLKQMLQHGHRGSRVIVTTRNQSVVNKLGTGVLAHKRKICLVPNSDQIKLHVLSNDDCWEVMKQTAFGPDDDKSDLEEIGRKIAEKCGGVPLVAIALGQVMSELRTV	no	17,16,1,6,4,5,10,3,2	NA	1.1e-47	NA	NA	NA	NA	NA	NA	NA	NA	NA	NA	NA	NA
Hordeum vulgare	HORVU1Hr1G085960.16	CNL	complete	HORVU1Hr1G085960.16:24	HORVU1Hr1G085960.16:1287	MGVQEDISIVPIVGLGGLGKSTLAESVFVDKMVNDFEVRAWVHVSKEFDLHKIGSAILKSINSSINLDNCSLQFLQENLRNELADRRYLIVLDDLWEENADKLERLKQMLQHGHRGSRVIVTTRNQSVVNKLGTGVLAHKRKICLVPNSDQIKLHVLSNDDCWEVMKQTAFGPDDDKSDLEEIGRKIAEKCGGVPLVAIALGQVMSELRTV	no	17,16,1,6,4,5,10,3,2,7,9,9,9,11,11,11,11,11,11,11,9,11,11,11,11,11,11,11,11,11	yes	9e-47	1.8e-28	NA	0.00091	NA	181	386	802	no	no	NA	NA	NA
Hordeum vulgare	HORVU1Hr1G085960.17	CNL	complete	HORVU1Hr1G085960.17:24	HORVU1Hr1G085960.17:1287	MGVQEDISIVPIVGLGGLGKSTLAESVFVDKMVNDFEVRAWVHVSKEFDLHKIGSAILKSINSSINLDNCSLQFLQENLRNELADRRYLIVLDDLWEENADKLERLKQMLQHGHRGSRVIVTTRNQSVVNKLGTGVLAHKRKICLVPNSDQIKLHVLSNDDCWEVMKQTAFGPDDDKSDLEEIGRKIAEKCGGVPLVAIALGQVMSELRTV	no	17,16,1,6,4,5,10,3,2,7,9,9,9,11,11,11,11,11,11,11,9,11,11,11,11,11,11,11,11,11	yes	9.1e-47	2e-28	NA	0.00099	NA	181	386	804	no	no	NA	NA	NA
Hordeum vulgare	HORVU1Hr1G085960.18	CNL	partial	HORVU1Hr1G085960.18:24	HORVU1Hr1G085960.18:471	MGVQEDISIVPIVGLGGLGKSTLAESVFVDKMVNDFEVRAWVHVSKEFDLHKIGSAILKSINSSINLDNCSLQFLQENLRNELADRRYLIVLDDLWEENADKLERLKQMLQHGHRGSRVIVTTRNQSVVNKLGTGVLAHKRKICLVPNSDQIKLHVLSNDDCWEVMKQTAFGPDDDKSDLEEIGRKIAEKCGGVPLVAIALGQVMSELRTV	no	17,16,1,6,4,5,10,3,2	NA	9.8e-48	NA	NA	NA	NA	NA	NA	NA	NA	NA	NA	NA	NA
Hordeum vulgare	HORVU1Hr1G085960.19	CNL	complete	HORVU1Hr1G085960.19:23	HORVU1Hr1G085960.19:1286	MGVQEDISIVPIVGLGGLGKSTLAESVFVDKMVNDFEVRAWVHVSKEFDLHKIGSAILKSINSSINLDNCSLQFLQENLRNELADRRYLIVLDDLWEENADKLERLKQMLQHGHRGSRVIVTTRNQSVVNKLGTGVLAHKRKICLVPNSDQIKLHVLSNDDCWEVMKQTAFGPDDDKSDLEEIGRKIAEKCGGVPLVAIALGQVMSELRTV	no	17,16,1,6,4,5,10,3,2,7,9,9,9,11,11,11,11,11,11,11,9,11,11,11,11,11,11,11,11,11	yes	8.5e-47	9.3e-29	NA	0.00035	NA	180	386	755	no	no	NA	NA	NA
Hordeum vulgare	HORVU1Hr1G085960.2	CNL	complete	HORVU1Hr1G085960.2:15	HORVU1Hr1G085960.2:1278	MGVQEDISIVPIVGLGGLGKSTLAESVFVDKMVNDFEVRAWVHVSKEFDLHKIGSAILKSINSSINLDNCSLQFLQENLRNELADRRYLIVLDDLWEENADKLERLKQMLQHGHRGSRVIVTTRNQSVVNKLGTGVLAHKRKICLVPNSDQIKLHVLSNDDCWEVMKQTAFGPDDDKSDLEEIGRKIAEKCGGVPLVAIALGQVMSELRTV	no	17,16,1,6,4,5,10,3,2,7,9,9,9,11,11,11,11,11,11,11,9,11,11,11,11,11,11,11,11,11	yes	8.9e-47	1.7e-28	NA	0.00072	NA	172	386	803	no	no	NA	NA	NA
Hordeum vulgare	HORVU1Hr1G085960.20	CNL	partial	HORVU1Hr1G085960.20:21	HORVU1Hr1G085960.20:468	MGVQEDISIVPIVGLGGLGKSTLAESVFVDKMVNDFEVRAWVHVSKEFDLHKIGSAILKSINSSINLDNCSLQFLQENLRNELADRRYLIVLDDLWEENADKLERLKQMLQHGHRGSRVIVTTRNQSVVNKLGTGVLAHKRKICLVPNSDQIKLHVLSNDDCWEVMKQTAFGPDDDKSDLEEIGRKIAEKCGGVPLVAIALGQVMSELRTV	no	17,16,1,6,4,5,10,3,2	NA	1.4e-47	NA	NA	NA	NA	NA	NA	NA	NA	NA	NA	NA	NA
Hordeum vulgare	HORVU1Hr1G085960.21	CNL	partial	HORVU1Hr1G085960.21:119	HORVU1Hr1G085960.21:1200	MGVQEDISIVPIVGLGGLGKSTLAESVFVDKMVNDFEVRAWVHVSKEFDLHKIGSAILKSINSSINLDNCSLQFLQENLRNELADRRYLIVLDDLWEENADKLERLKQMLQHGHRGSRVIVTTRNQSVVNKLGTGVLAHKRKICLVPNSDQIKLHVLSNDDCWEVMKQTAFGPDDDKSDLEEIGRKIAEKCGGVPLVAIALGQVMSELRTV	no	1,6,4,5,10,3,2,7,9,9,9,11,11,11,11,11,11,11,9,11,11,11,11,11,11,11,11,11	yes	8e-47	6.3e-29	NA	0.00014	NA	94	386	777	no	no	NA	NA	NA
Hordeum vulgare	HORVU1Hr1G085960.22	CNL	partial	HORVU1Hr1G085960.22:119	HORVU1Hr1G085960.22:1205	MGVQEDISIVPIVGLGGLGKSTLAESVFVDKMVNDFEVRAWVHVSKEFDLHKIGSAILKSINSSINLDNCSLQFLQENLRNELADRRYLIVLDDLWEENADKLERLKQMLQHGHRGSRVIVTTRNQSVVNKLGTGVLAHKRKICLVPNSDQIKLHVLSNDDCWEVMKQTAFGPDDDKSDLEEIGRKIAEKCGGVPLVAIALGQVMSELRTV	no	1,6,4,5,10,3,2,7,9,9,9,11,11,11,11,11,11,11,9,11,11,11,11,11,11,11,11,11	yes	8.6e-47	8e-29	NA	0.00026	NA	94	391	813	no	no	yes	NA	NA
Hordeum vulgare	HORVU1Hr1G085960.23	NA	partial	HORVU1Hr1G085960.23:14	HORVU1Hr1G085960.23:788	NA	no	7,9,9,9,11,11,11,11,11,11,11,9,11,11,11,11,11,11,11,11,11	yes	NA	6e-30	NA	7.4e-09	NA	NA	NA	NA	NA	NA	NA	NA	NA
Hordeum vulgare	HORVU1Hr1G085960.3	CNL	complete	HORVU1Hr1G085960.3:15	HORVU1Hr1G085960.3:1278	MGVQEDISIVPIVGLGGLGKSTLAESVFVDKMVNDFEVRAWVHVSKEFDLHKIGSAILKSINSSINLDNCSLQFLQENLRNELADRRYLIVLDDLWEENADKLERLKQMLQHGHRGSRVIVTTRNQSVVNKLGTGVLAHKRKICLVPNSDQIKLHVLSNDDCWEVMKQTAFGPDDDKSDLEEIGRKIAEKCGGVPLVAIALGQVMSELRTV	no	17,16,1,6,4,5,10,3,2,7,9,9,9,11,11,11,11,11,11,11,9,11,11,11,11,11,11,11,11,11	yes	8.9e-47	1.3e-28	NA	0.00072	NA	172	386	799	no	no	NA	NA	NA
Hordeum vulgare	HORVU1Hr1G085960.4	CNL	complete	HORVU1Hr1G085960.4:15	HORVU1Hr1G085960.4:1278	MGVQEDISIVPIVGLGGLGKSTLAESVFVDKMVNDFEVRAWVHVSKEFDLHKIGSAILKSINSSINLDNCSLQFLQENLRNELADRRYLIVLDDLWEENADKLERLKQMLQHGHRGSRVIVTTRNQSVVNKLGTGVLAHKRKICLVPNSDQIKLHVLSNDDCWEVMKQTAFGPDDDKSDLEEIGRKIAEKCGGVPLVAIALGQVMSELRTV	no	17,16,1,6,4,5,10,3,2,7,9,9,9,11,11,11,11,11,11,11,9,11,11,11,11,11,11,11,11,11	yes	8.3e-47	1e-28	NA	0.00036	NA	172	386	768	no	no	NA	NA	NA
Hordeum vulgare	HORVU1Hr1G085960.5	CNL	complete	HORVU1Hr1G085960.5:15	HORVU1Hr1G085960.5:1278	MGVQEDISIVPIVGLGGLGKSTLAESVFVDKMVNDFEVRAWVHVSKEFDLHKIGSAILKSINSSINLDNCSLQFLQENLRNELADRRYLIVLDDLWEENADKLERLKQMLQHGHRGSRVIVTTRNQSVVNKLGTGVLAHKRKICLVPNSDQIKLHVLSNDDCWEVMKQTAFGPDDDKSDLEEIGRKIAEKCGGVPLVAIALGQVMSELRTV	no	17,16,1,6,4,5,10,3,2,7,9,9,9,11,11,11,11,11,11,11,9,11,11,11,11,11,11,11,11,11	yes	8.9e-47	1.7e-28	NA	0.00071	NA	172	386	802	no	no	yes	NA	NA
Hordeum vulgare	HORVU1Hr1G085960.6	CNL	complete	HORVU1Hr1G085960.6:15	HORVU1Hr1G085960.6:1278	MGVQEDISIVPIVGLGGLGKSTLAESVFVDKMVNDFEVRAWVHVSKEFDLHKIGSAILKSINSSINLDNCSLQFLQENLRNELADRRYLIVLDDLWEENADKLERLKQMLQHGHRGSRVIVTTRNQSVVNKLGTGVLAHKRKICLVPNSDQIKLHVLSNDDCWEVMKQTAFGPDDDKSDLEEIGRKIAEKCGGVPLVAIALGQVMSELRTV	no	17,16,1,6,4,5,10,3,2,7,9,9,9,11,11,11,11,11,11,11,9,11,11,11,11,11,11,11,11,11	yes	8.9e-47	1.7e-28	NA	0.00078	NA	172	386	804	no	no	NA	NA	NA
Hordeum vulgare	HORVU1Hr1G085960.7	CNL	partial	HORVU1Hr1G085960.7:15	HORVU1Hr1G085960.7:462	MGVQEDISIVPIVGLGGLGKSTLAESVFVDKMVNDFEVRAWVHVSKEFDLHKIGSAILKSINSSINLDNCSLQFLQENLRNELADRRYLIVLDDLWEENADKLERLKQMLQHGHRGSRVIVTTRNQSVVNKLGTGVLAHKRKICLVPNSDQIKLHVLSNDDCWEVMKQTAFGPDDDKSDLEEIGRKIAEKCGGVPLVAIALGQVMSELRTV	no	17,16,1,6,4,5,10,3,2	NA	1.4e-47	NA	NA	NA	NA	NA	NA	NA	NA	NA	NA	NA	NA
Hordeum vulgare	HORVU1Hr1G085960.8	CNL	complete	HORVU1Hr1G085960.8:47	HORVU1Hr1G085960.8:1310	MGVQEDISIVPIVGLGGLGKSTLAESVFVDKMVNDFEVRAWVHVSKEFDLHKIGSAILKSINSSINLDNCSLQFLQENLRNELADRRYLIVLDDLWEENADKLERLKQMLQHGHRGSRVIVTTRNQSVVNKLGTGVLAHKRKICLVPNSDQIKLHVLSNDDCWEVMKQTAFGPDDDKSDLEEIGRKIAEKCGGVPLVAIALGQVMSELRTV	no	17,16,1,6,4,5,10,3,2,7,9,9,9,11,11,11,11,11,11,11,9,11,11,11,11,11,11,11,11,11	yes	9.4e-47	1.9e-28	NA	0.0012	NA	204	386	804	no	no	NA	NA	NA
Hordeum vulgare	HORVU1Hr1G085960.9	CNL	complete	HORVU1Hr1G085960.9:47	HORVU1Hr1G085960.9:1310	MGVQEDISIVPIVGLGGLGKSTLAESVFVDKMVNDFEVRAWVHVSKEFDLHKIGSAILKSINSSINLDNCSLQFLQENLRNELADRRYLIVLDDLWEENADKLERLKQMLQHGHRGSRVIVTTRNQSVVNKLGTGVLAHKRKICLVPNSDQIKLHVLSNDDCWEVMKQTAFGPDDDKSDLEEIGRKIAEKCGGVPLVAIALGQVMSELRTV	no	17,16,1,6,4,5,10,3,2,7,9,9,9,11,11,11,11,11,11,11,9,11,11,11,11,11,11,11,11,11	yes	9.4e-47	2.1e-28	NA	0.0011	NA	204	386	802	no	no	NA	NA	NA
Hordeum vulgare	HORVU1Hr1G086050.1	CNL	partial	HORVU1Hr1G086050.1:15	HORVU1Hr1G086050.1:462	KGVQEDISIVPIVGLGGLGKSTLAESVFVDKMVNDFEVRAWVHVSKKFDLRKIGSAILKSINSSINLDNCSLQFLQENLRNELADRRYLIVLDDLWEEDADKLERLKQMLQHGYRGSRVIVTTRNQSVVNKLRTGALSHKRKIRLVPKSDQIKLHGLSNDDCWEVMKQTAFGPDDDKSDLEEIGRKIAEKCGGVPLVAIALGQVMSELRTV	no	17,16,1,6,4,5,10,3,2	NA	7.1e-46	NA	NA	NA	NA	NA	NA	NA	NA	NA	NA	NA	NA
Hordeum vulgare	HORVU1Hr1G086050.11	CNL	partial	HORVU1Hr1G086050.11:49	HORVU1Hr1G086050.11:559	KGVQEDISIVPIVGLGGLGKSTLAESVFVDKMVNDFEVRAWVHVSKKFDLRKIGSAILKSINSSINLDNCSLQFLQENLRNELADRRYLIVLDDLWEEDADKLERLKQMLQHGYRGSRVIVTTRNQSVVNKLRTGALSHKRKIRLVPKSDQIKLHGLSNDDCWEVMKQTAFGPDDDKSDLEEIGRKIAEKCGGVPLVAIALGQVMSELRTV	no	17,16,1,6,4,5,10,3,2,7	NA	8.3e-46	NA	NA	NA	NA	NA	NA	NA	NA	NA	NA	NA	NA
Hordeum vulgare	HORVU1Hr1G086050.12	CNL	partial	HORVU1Hr1G086050.12:47	HORVU1Hr1G086050.12:557	KGVQEDISIVPIVGLGGLGKSTLAESVFVDKMVNDFEVRAWVHVSKKFDLRKIGSAILKSINSSINLDNCSLQFLQENLRNELADRRYLIVLDDLWEEDADKLERLKQMLQHGYRGSRVIVTTRNQSVVNKLRTGALSHKRKIRLVPKSDQIKLHGLSNDDCWEVMKQTAFGPDDDKSDLEEIGRKIAEKCGGVPLVAIALGQVMSELRTV	no	17,16,1,6,4,5,10,3,2,7	NA	1.1e-45	0.012	NA	NA	NA	NA	NA	NA	NA	NA	NA	NA	NA
Hordeum vulgare	HORVU1Hr1G086050.15	CNL	partial	HORVU1Hr1G086050.15:47	HORVU1Hr1G086050.15:544	KGVQEDISIVPIVGLGGLGKSTLAESVFVDKMVNDFEVRAWVHVSKKFDLRKIGSAILKSINSSINLDNCSLQFLQENLRNELADRRYLIVLDDLWEEDADKLERLKQMLQHGYRGSRVIVTTRNQSVVNKLRTGALSHKRKIRLVPKSDQIKLHGLSNDDCWEVMKQTAFGPDDDKSDLEEIGRKIAEKCGGVPLVAIALGQVMSELRTV	no	17,16,1,6,4,5,10,3,2,7	NA	1.1e-45	0.012	NA	NA	NA	NA	NA	NA	NA	NA	NA	NA	NA
Hordeum vulgare	HORVU1Hr1G086050.17	CNL	complete	HORVU1Hr1G086050.17:15	HORVU1Hr1G086050.17:1395	KGVQEDISIVPIVGLGGLGKSTLAESVFVDKMVNDFEVRAWVHVSKKFDLRKIGSAILKSINSSINLDNCSLQFLQENLRNELADRRYLIVLDDLWEEDADKLERLKQMLQHGYRGSRVIVTTRNQSVVNKLRTGALSHKRKIRLVPKSDQIKLHGLSNDDCWEVMKQTAFGPDDDKSDLEEIGRKIAEKCGGVPLVAIALGQVMSELRTV	no	17,16,1,6,4,5,10,3,2,7,9,9,11,11,11,11,11,11,11,11,11,11,11,9,19,11,11,11,11,11,11,11,11	yes	4.8e-45	4e-37	NA	0.0028	NA	172	386	914	no	no	NA	NA	NA
Hordeum vulgare	HORVU1Hr1G086050.19	CNL	complete	HORVU1Hr1G086050.19:15	HORVU1Hr1G086050.19:1395	KGVQEDISIVPIVGLGGLGKSTLAESVFVDKMVNDFEVRAWVHVSKKFDLRKIGSAILKSINSSINLDNCSLQFLQENLRNELADRRYLIVLDDLWEEDADKLERLKQMLQHGYRGSRVIVTTRNQSVVNKLRTGALSHKRKIRLVPKSDQIKLHGLSNDDCWEVMKQTAFGPDDDKSDLEEIGRKIAEKCGGVPLVAIALGQVMSELRTV	no	17,16,1,6,4,5,10,3,2,7,9,9,11,11,11,11,11,11,11,11,11,11,11,9,19,11,11,11,11,11,11,11,11	yes	4.7e-45	4.4e-37	NA	0.0034	NA	172	386	928	no	no	NA	NA	NA
Hordeum vulgare	HORVU1Hr1G086050.2	CNL	partial	HORVU1Hr1G086050.2:15	HORVU1Hr1G086050.2:525	KGVQEDISIVPIVGLGGLGKSTLAESVFVDKMVNDFEVRAWVHVSKKFDLRKIGSAILKSINSSINLDNCSLQFLQENLRNELADRRYLIVLDDLWEEDADKLERLKQMLQHGYRGSRVIVTTRNQSVVNKLRTGALSHKRKIRLVPKSDQIKLHGLSNDDCWEVMKQTAFGPDDDKSDLEEIGRKIAEKCGGVPLVAIALGQVMSELRTV	no	17,16,1,6,4,5,10,3,2,7	NA	7.5e-46	NA	NA	NA	NA	NA	NA	NA	NA	NA	NA	NA	NA
Hordeum vulgare	HORVU1Hr1G086050.24	CNL	complete	HORVU1Hr1G086050.24:15	HORVU1Hr1G086050.24:1395	KGVQEDISIVPIVGLGGLGKSTLAESVFVDKMVNDFEVRAWVHVSKKFDLRKIGSAILKSINSSINLDNCSLQFLQENLRNELADRRYLIVLDDLWEEDADKLERLKQMLQHGYRGSRVIVTTRNQSVVNKLRTGALSHKRKIRLVPKSDQIKLHGLSNDDCWEVMKQTAFGPDDDKSDLEEIGRKIAEKCGGVPLVAIALGQVMSELRTV	no	17,16,1,6,4,5,10,3,2,7,9,9,11,11,11,11,11,11,11,11,11,11,11,9,19,11,11,11,11,11,11,11,11	yes	4.7e-45	4.4e-37	NA	0.0034	NA	172	386	928	no	no	NA	NA	NA
Hordeum vulgare	HORVU1Hr1G086050.25	CNL	partial	HORVU1Hr1G086050.25:15	HORVU1Hr1G086050.25:462	KGVQEDISIVPIVGLGGLGKSTLAESVFVDKMVNDFEVRAWVHVSKKFDLRKIGSAILKSINSSINLDNCSLQFLQENLRNELADRRYLIVLDDLWEEDADKLERLKQMLQHGYRGSRVIVTTRNQSVVNKLRTGALSHKRKIRLVPKSDQIKLHGLSNDDCWEVMKQTAFGPDDDKSDLEEIGRKIAEKCGGVPLVAIALGQVMSELRTV	no	17,16,1,6,4,5,10,3,2	NA	7.1e-46	NA	NA	NA	NA	NA	NA	NA	NA	NA	NA	NA	NA
Hordeum vulgare	HORVU1Hr1G086050.26	CNL	partial	HORVU1Hr1G086050.26:15	HORVU1Hr1G086050.26:525	KGVQEDISIVPIVGLGGLGKSTLAESVFVDKMVNDFEVRAWVHVSKKFDLRKIGSAILKSINSSINLDNCSLQFLQENLRNELADRRYLIVLDDLWEEDADKLERLKQMLQHGYRGSRVIVTTRNQSVVNKLRTGALSHKRKIRLVPKSDQIKLHGLSNDDCWEVMKQTAFGPDDDKSDLEEIGRKIAEKCGGVPLVAIALGQVMSELRTV	no	17,16,1,6,4,5,10,3,2,7	NA	9.6e-46	0.011	NA	NA	NA	NA	NA	NA	NA	NA	NA	NA	NA
Hordeum vulgare	HORVU1Hr1G086050.27	CNL	partial	HORVU1Hr1G086050.27:15	HORVU1Hr1G086050.27:525	KGVQEDISIVPIVGLGGLGKSTLAESVFVDKMVNDFEVRAWVHVSKKFDLRKIGSAILKSINSSINLDNCSLQFLQENLRNELADRRYLIVLDDLWEEDADKLERLKQMLQHGYRGSRVIVTTRNQSVVNKLRTGALSHKRKIRLVPKSDQIKLHGLSNDDCWEVMKQTAFGPDDDKSDLEEIGRKIAEKCGGVPLVAIALGQVMSELRTV	no	17,16,1,6,4,5,10,3,2,7	NA	9.6e-46	0.011	NA	NA	NA	NA	NA	NA	NA	NA	NA	NA	NA
Hordeum vulgare	HORVU1Hr1G086050.28	CNL	partial	HORVU1Hr1G086050.28:105	HORVU1Hr1G086050.28:370	KGVQEDISIVPIVGLGGLGKSTLAESVFVDKMVNDFEVRAWVHVSKKFDLRKIGSAILKSINSSINLDNCSLQFLQENLRNELADRRYLIVLDDLWEEDADKLERLKQMLQHGYRGSRVIVTTRNQSVVNKLRTGALSHKRKIRLVPKSDQIKLHGLSNDDCWEVMKQTAFGPDDDKSDLEEIGRKIAEKCGGVPLVAIALGQVMSELRTV	no	1,6,4,5,10,3,2	NA	3.9e-46	NA	NA	NA	NA	NA	NA	NA	NA	NA	NA	NA	NA
Hordeum vulgare	HORVU1Hr1G086050.29	CNL	complete	HORVU1Hr1G086050.29:34	HORVU1Hr1G086050.29:1414	KGVQEDISIVPIVGLGGLGKSTLAESVFVDKMVNDFEVRAWVHVSKKFDLRKIGSAILKSINSSINLDNCSLQFLQENLRNELADRRYLIVLDDLWEEDADKLERLKQMLQHGYRGSRVIVTTRNQSVVNKLRTGALSHKRKIRLVPKSDQIKLHGLSNDDCWEVMKQTAFGPDDDKSDLEEIGRKIAEKCGGVPLVAIALGQVMSELRTV	no	17,16,1,6,4,5,10,3,2,7,9,9,11,11,11,11,11,11,11,11,11,11,11,9,19,11,11,11,11,11,11,11,11	yes	4.7e-45	4.2e-37	NA	0.003	NA	191	386	901	no	no	NA	NA	NA
Hordeum vulgare	HORVU1Hr1G086050.3	CNL	partial	HORVU1Hr1G086050.3:27	HORVU1Hr1G086050.3:474	KGVQEDISIVPIVGLGGLGKSTLAESVFVDKMVNDFEVRAWVHVSKKFDLRKIGSAILKSINSSINLDNCSLQFLQENLRNELADRRYLIVLDDLWEEDADKLERLKQMLQHGYRGSRVIVTTRNQSVVNKLRTGALSHKRKIRLVPKSDQIKLHGLSNDDCWEVMKQTAFGPDDDKSDLEEIGRKIAEKCGGVPLVAIALGQVMSELRTV	no	17,16,1,6,4,5,10,3,2	NA	5.7e-46	NA	NA	NA	NA	NA	NA	NA	NA	NA	NA	NA	NA
Hordeum vulgare	HORVU1Hr1G086050.31	NA	partial	HORVU1Hr1G086050.31:110	HORVU1Hr1G086050.31:773	NA	no	9,9,11,11,11,11,11,11,11,9,19,11,11,11,11,11,11,11,11	yes	NA	1.4e-28	NA	9.2e-06	NA	NA	NA	NA	NA	NA	NA	NA	NA
Hordeum vulgare	HORVU1Hr1G086050.32	CNL	partial	HORVU1Hr1G086050.32:105	HORVU1Hr1G086050.32:433	KGVQEDISIVPIVGLGGLGKSTLAESVFVDKMVNDFEVRAWVHVSKKFDLRKIGSAILKSINSSINLDNCSLQFLQENLRNELADRRYLIVLDDLWEEDADKLERLKQMLQHGYRGSRVIVTTRNQSVVNKLRTGALSHKRKIRLVPKSDQIKLHGLSNDDCWEVMKQTAFGPDDDKSDLEEIGRKIAEKCGGVPLVAIALGQVMSELRTV	no	1,6,4,5,10,3,2,7	NA	7.1e-46	0.0091	NA	NA	NA	NA	NA	NA	NA	NA	NA	NA	NA
Hordeum vulgare	HORVU1Hr1G086050.33	CNL	partial	HORVU1Hr1G086050.33:119	HORVU1Hr1G086050.33:626	KGVQEDISIVPIVGLGGLGKSTLAESVFVDKMVNDFEVRAWVHVSKKFDLRKIGSAILKSINSSINLDNCSLQFLQENLRNELADRRYLIVLDDLWEEDADKLERLKQMLQHGYRGSRVIVTTRNQSVVNKLRTGALSHKRKIRLVPKSDQIKLHGLSNDDCWEVMKQTAFGPDDDKSDLEEIGRKIAEKCGGVPLVAIALGQVMSELRTV	no	1,6,4,5,10,3,2,7,9,9,11,11	NA	9.6e-46	6.6e-09	NA	NA	NA	NA	NA	NA	NA	NA	NA	NA	NA
Hordeum vulgare	HORVU1Hr1G086050.34	CNL	partial	HORVU1Hr1G086050.34:79	HORVU1Hr1G086050.34:344	KGVQEDISIVPIVGLGGLGKSTLAESVFVDKMVNDFEVRAWVHVSKKFDLRKIGSAILKSINSSINLDNCSLQFLQENLRNELADRRYLIVLDDLWEEDADKLERLKQMLQHGYRGSRVIVTTRNQSVVNKLRTGALSHKRKIRLVPKSDQIKLHGLSNDDCWEVMKQTAFGPDDDKSDLEEIGRKIAEKCGGVPLVAIALGQVMSELRTV	no	1,6,4,5,10,3,2	NA	2.5e-46	NA	NA	NA	NA	NA	NA	NA	NA	NA	NA	NA	NA
Hordeum vulgare	HORVU1Hr1G086050.6	CNL	complete	HORVU1Hr1G086050.6:26	HORVU1Hr1G086050.6:1406	KGVQEDISIVPIVGLGGLGKSTLAESVFVDKMVNDFEVRAWVHVSKKFDLRKIGSAILKSINSSINLDNCSLQFLQENLRNELADRRYLIVLDDLWEEDADKLERLKQMLQHGYRGSRVIVTTRNQSVVNKLRTGALSHKRKIRLVPKSDQIKLHGLSNDDCWEVMKQTAFGPDDDKSDLEEIGRKIAEKCGGVPLVAIALGQVMSELRTV	no	17,16,1,6,4,5,10,3,2,7,9,9,11,11,11,11,11,11,11,11,11,11,11,9,19,11,11,11,11,11,11,11,11	yes	4.8e-45	5.5e-37	NA	0.0043	NA	183	386	928	no	no	yes	NA	NA
Hordeum vulgare	HORVU1Hr1G086050.7	CNL	partial	HORVU1Hr1G086050.7:50	HORVU1Hr1G086050.7:560	KGVQEDISIVPIVGLGGLGKSTLAESVFVDKMVNDFEVRAWVHVSKKFDLRKIGSAILKSINSSINLDNCSLQFLQENLRNELADRRYLIVLDDLWEEDADKLERLKQMLQHGYRGSRVIVTTRNQSVVNKLRTGALSHKRKIRLVPKSDQIKLHGLSNDDCWEVMKQTAFGPDDDKSDLEEIGRKIAEKCGGVPLVAIALGQVMSELRTV	no	17,16,1,6,4,5,10,3,2,7	NA	8.7e-46	NA	NA	NA	NA	NA	NA	NA	NA	NA	NA	NA	NA
Hordeum vulgare	HORVU1Hr1G086050.8	CNL	partial	HORVU1Hr1G086050.8:50	HORVU1Hr1G086050.8:560	KGVQEDISIVPIVGLGGLGKSTLAESVFVDKMVNDFEVRAWVHVSKKFDLRKIGSAILKSINSSINLDNCSLQFLQENLRNELADRRYLIVLDDLWEEDADKLERLKQMLQHGYRGSRVIVTTRNQSVVNKLRTGALSHKRKIRLVPKSDQIKLHGLSNDDCWEVMKQTAFGPDDDKSDLEEIGRKIAEKCGGVPLVAIALGQVMSELRTV	no	17,16,1,6,4,5,10,3,2,7	NA	8.6e-46	NA	NA	NA	NA	NA	NA	NA	NA	NA	NA	NA	NA
Hordeum vulgare	HORVU1Hr1G089890.1	CNL	partial	HORVU1Hr1G089890.1:69	HORVU1Hr1G089890.1:146	NA	no	17,16	NA	NA	NA	NA	NA	NA	NA	NA	NA	NA	NA	NA	NA	NA
Hordeum vulgare	HORVU1Hr1G089890.2	CNL	partial	HORVU1Hr1G089890.2:66	HORVU1Hr1G089890.2:143	NA	no	17,16	NA	NA	NA	NA	NA	NA	NA	NA	NA	NA	NA	NA	NA	NA
Hordeum vulgare	HORVU1Hr1G089890.3	NA	partial	HORVU1Hr1G089890.3:131	HORVU1Hr1G089890.3:310	NA	no	8,7,11,9,11	NA	NA	7.5e-07	NA	0.0058	NA	NA	NA	NA	NA	NA	NA	NA	NA
Hordeum vulgare	HORVU1Hr1G089890.4	CNL	partial	HORVU1Hr1G089890.4:23	HORVU1Hr1G089890.4:148	MDESKELKVVPIVGSGGLGKTTLAMEVYRKIESGGNFQCQACVSVSRTLDLVKLLKDILSQIDKDAYKECQSWEKEQLIREIKQILTGKRYFIVIDDVWKEQDWKLIKSAFPENNNGSRIIATTRITGVANQCCSNSVSQPYQMEPLDDVD	no	1,6,4,5	NA	1.3e-34	NA	NA	NA	NA	NA	NA	NA	NA	NA	NA	NA	NA
Hordeum vulgare	HORVU1Hr1G089890.5	NA	partial	HORVU1Hr1G089890.5:131	HORVU1Hr1G089890.5:310	NA	no	8,7,11,9,11	NA	NA	7.2e-07	NA	0.024	NA	NA	NA	NA	NA	NA	NA	NA	NA
Hordeum vulgare	HORVU1Hr1G089890.7	NA	partial	HORVU1Hr1G089890.7:3	HORVU1Hr1G089890.7:182	NA	no	8,7,11,9,11	NA	NA	2.1e-07	NA	0.01	NA	NA	NA	NA	NA	NA	NA	NA	NA
Hordeum vulgare	HORVU1Hr1G089890.8	NA	partial	HORVU1Hr1G089890.8:3	HORVU1Hr1G089890.8:182	NA	no	8,7,11,9,11	NA	NA	2.1e-07	NA	0.01	NA	NA	NA	NA	NA	NA	NA	NA	NA
Hordeum vulgare	HORVU1Hr1G089930.1	CNL	partial	HORVU1Hr1G089930.1:13	HORVU1Hr1G089930.1:244	MDGSKDLKVVPIVGSGGLGKTTLAMEVYRKIGSGGDFQCQACVSVSRTLDLVKLLKDILSQVDKDAYKGCQSWEMEQLIRETKQILTGKRCGVY	no	17,16,1,6	NA	9.5e-12	NA	NA	NA	NA	NA	NA	NA	NA	NA	NA	NA	NA
Hordeum vulgare	HORVU1Hr1G089930.2	CNL	partial	HORVU1Hr1G089930.2:13	HORVU1Hr1G089930.2:244	MDGSKDLKVVPIVGSGGLGKTTLAMEVYRKIGSGGDFQCQACVSVSRTLDLVKLLKDILSQVDKDAYKGCQSWEMEQLIRETKQILTGKSTE	no	17,16,1,6	NA	2.8e-11	NA	NA	NA	NA	NA	NA	NA	NA	NA	NA	NA	NA
Hordeum vulgare	HORVU1Hr1G089930.3	CNL	partial	HORVU1Hr1G089930.3:13	HORVU1Hr1G089930.3:244	MDGSKDLKVVPIVGSGGLGKTTLAMEVYRKIGSGGDFQCQACVSVSRTLDLVKLLKDILSQVDKDAYKGCQSWEMEQLIRETKQILTGKRCGVY	no	17,16,1,6	NA	9.5e-12	NA	NA	NA	NA	NA	NA	NA	NA	NA	NA	NA	NA
Hordeum vulgare	HORVU1Hr1G089930.4	CNL	partial	HORVU1Hr1G089930.4:13	HORVU1Hr1G089930.4:244	MDGSKDLKVVPIVGSGGLGKTTLAMEVYRKIGSGGDFQCQACVSVSRTLDLVKLLKDILSQVDKDAYKGCQSWEMEQLIRETKQILTGKRNVADIGRWHQVD	no	17,16,1,6	NA	6.1e-12	NA	NA	NA	NA	NA	NA	NA	NA	NA	NA	NA	NA
Hordeum vulgare	HORVU1Hr1G089930.5	CNL	partial	HORVU1Hr1G089930.5:13	HORVU1Hr1G089930.5:244	MDGSKDLKVVPIVGSGGLGKTTLAMEVYRKIGSGGDFQCQACVSVSRTLDLVKLLKDILSQVDKDAYKGCQSWEMEQLIRETKQILTGKSTE	no	17,16,1,6	NA	2.8e-11	NA	NA	NA	NA	NA	NA	NA	NA	NA	NA	NA	NA
Hordeum vulgare	HORVU1Hr1G089960.1	CNL	partial	HORVU1Hr1G089960.1:4	HORVU1Hr1G089960.1:316	NA	no	10,3,12,2,8,7,11,9,11	NA	1.6e-10	1.2e-06	NA	0.0083	NA	NA	NA	NA	NA	NA	NA	NA	NA
Hordeum vulgare	HORVU1Hr1G089990.1	CNL	partial	HORVU1Hr1G089990.1:1	HORVU1Hr1G089990.1:232	NA	no	12,2,8,7,11,9,11	NA	NA	3.4e-06	NA	0.0035	NA	NA	NA	NA	NA	NA	NA	NA	NA
Hordeum vulgare	HORVU1Hr1G089990.2	CNL	partial	HORVU1Hr1G089990.2:1	HORVU1Hr1G089990.2:232	NA	no	12,2,8,7,11,9,11	NA	NA	3.4e-06	NA	0.0035	NA	NA	NA	NA	NA	NA	NA	NA	NA
Hordeum vulgare	HORVU1Hr1G090330.1	CNL	complete	HORVU1Hr1G090330.1:73	HORVU1Hr1G090330.1:1344	ATNTQTVSVLPIVGPGGIGKTTFTTHLYNDSRTQDHFQVRVWVCVSTDFDVLKLTREILGCIPATDEEGSSGVPNGTTNLDQLQRSIAHRLKSKRFLIVLDDIWKCDGEDQWKTLLAPFTKGEAKGSMLLVTTRFPKVADMVKTLDPLELRGLESNDFITFFEACIFGEDNKPEKYEDELAGIARKIANKLKGSPLAARTVGRLLYKNLSH	no	16,1,6,4,5,3,12,2,7,9,11,11,11,11	yes	3.2e-36	0.015	NA	NA	NA	246	391	737	no	no	NA	NA	NA
Hordeum vulgare	HORVU1Hr1G090330.10	CNL	complete	HORVU1Hr1G090330.10:73	HORVU1Hr1G090330.10:1344	ATNTQTVSVLPIVGPGGIGKTTFTTHLYNDSRTQDHFQVRVWVCVSTDFDVLKLTREILGCIPATDEEGSSGVPNGTTNLDQLQRSIAHRLKSKRFLIVLDDIWKCDGEDQWKTLLAPFTKGEAKGSMLLVTTRFPKVADMVKTLDPLELRGLESNDFITFFEACIFGEDNKPEKYEDELAGIARKIANKLKGSPLAARTVGRLLYKNLSH	no	16,1,6,4,5,3,12,2,7,9,11,11,11,11	yes	3.2e-36	0.015	NA	NA	NA	246	391	737	no	no	NA	NA	NA
Hordeum vulgare	HORVU1Hr1G090330.11	CNL	complete	HORVU1Hr1G090330.11:73	HORVU1Hr1G090330.11:1344	ATNTQTVSVLPIVGPGGIGKTTFTTHLYNDSRTQDHFQVRVWVCVSTDFDVLKLTREILGCIPATDEEGSSGVPNGTTNLDQLQRSIAHRLKSKRFLIVLDDIWKCDGEDQWKTLLAPFTKGEAKGSMLLVTTRFPKVADMVKTLDPLELRGLESNDFITFFEACIFGEDNKPEKYEDELAGIARKIANKLKGSPLAARTVGRLLYKNLSH	no	16,1,6,4,5,3,12,2,7,9,11,11,11,11	yes	3.2e-36	0.015	NA	NA	NA	246	391	737	no	no	NA	NA	NA
Hordeum vulgare	HORVU1Hr1G090330.12	CNL	complete	HORVU1Hr1G090330.12:73	HORVU1Hr1G090330.12:1344	ATNTQTVSVLPIVGPGGIGKTTFTTHLYNDSRTQDHFQVRVWVCVSTDFDVLKLTREILGCIPATDEEGSSGVPNGTTNLDQLQRSIAHRLKSKRFLIVLDDIWKCDGEDQWKTLLAPFTKGEAKGSMLLVTTRFPKVADMVKTLDPLELRGLESNDFITFFEACIFGEDNKPEKYEDELAGIARKIANKLKGSPLAARTVGRLLYKNLSH	no	16,1,6,4,5,3,12,2,7,9,11,11,11,11	yes	3.2e-36	0.015	NA	NA	NA	246	391	737	no	no	NA	NA	NA
Hordeum vulgare	HORVU1Hr1G090330.13	CNL	complete	HORVU1Hr1G090330.13:73	HORVU1Hr1G090330.13:1344	ATNTQTVSVLPIVGPGGIGKTTFTTHLYNDSRTQDHFQVRVWVCVSTDFDVLKLTREILGCIPATDEEGSSGVPNGTTNLDQLQRSIAHRLKSKRFLIVLDDIWKCDGEDQWKTLLAPFTKGEAKGSMLLVTTRFPKVADMVKTLDPLELRGLESNDFITFFEACIFGEDNKPEKYEDELAGIARKIANKLKGSPLAARTVGRLLYKNLSH	no	16,1,6,4,5,3,12,2,7,9,11,11,11,11	yes	3.2e-36	0.015	NA	NA	NA	246	391	737	no	no	NA	NA	NA
Hordeum vulgare	HORVU1Hr1G090330.14	CNL	complete	HORVU1Hr1G090330.14:73	HORVU1Hr1G090330.14:1344	ATNTQTVSVLPIVGPGGIGKTTFTTHLYNDSRTQDHFQVRVWVCVSTDFDVLKLTREILGCIPATDEEGSSGVPNGTTNLDQLQRSIAHRLKSKRFLIVLDDIWKCDGEDQWKTLLAPFTKGEAKGSMLLVTTRFPKVADMVKTLDPLELRGLESNDFITFFEACIFGEDNKPEKYEDELAGIARKIANKLKGSPLAARTVGRLLYKNLSH	no	16,1,6,4,5,3,12,2,7,9,11,11,11,11	yes	3.2e-36	0.015	NA	NA	NA	246	391	737	no	no	NA	NA	NA
Hordeum vulgare	HORVU1Hr1G090330.15	CNL	complete	HORVU1Hr1G090330.15:73	HORVU1Hr1G090330.15:1344	ATNTQTVSVLPIVGPGGIGKTTFTTHLYNDSRTQDHFQVRVWVCVSTDFDVLKLTREILGCIPATDEEGSSGVPNGTTNLDQLQRSIAHRLKSKRFLIVLDDIWKCDGEDQWKTLLAPFTKGEAKGSMLLVTTRFPKVADMVKTLDPLELRGLESNDFITFFEACIFGEDNKPEKYEDELAGIARKIANKLKGSPLAARTVGRLLYKNLSH	no	16,1,6,4,5,3,12,2,7,9,11,11,11,11	yes	3.2e-36	0.015	NA	NA	NA	246	391	737	no	no	NA	NA	NA
Hordeum vulgare	HORVU1Hr1G090330.16	CNL	partial	HORVU1Hr1G090330.16:73	HORVU1Hr1G090330.16:577	ATNTQTVSVLPIVGPGGIGKTTFTTHLYNDSRTQDHFQVRVWVCVSTDFDVLKLTREILGCIPATDEEGSSGVPNGTTNLDQLQRSIAHRLKSKRFLIVLDDIWKCDGEDQWKTLLAPFTKGEAKGSMLLVTTRFPKVADMVKTLDPLELRGLESNDFITFFEACIFGEDNKPEKYEDELAGIARKIANKLKGSPLAARTVGRLLYKNLSH	no	16,1,6,4,5,3,12,2,7	yes	1.5e-36	0.059	NA	NA	NA	227	391	237	no	no	NA	NA	NA
Hordeum vulgare	HORVU1Hr1G090330.17	CNL	complete	HORVU1Hr1G090330.17:73	HORVU1Hr1G090330.17:1324	ATNTQTVSVLPIVGPGGIGKTTFTTHLYNDSRTQDHFQVRVWVCVSTDFDVLKLTREILGCIPATDEEGSSGVPNGTTNLDQLQRSIAHRLKSKRFLIVLDDIWKCDGEDQWKTLLAPFTKGEAKGSMLLVTTRFPKVADMVKTLDPLELRGLESNDFITFFEACIFGEDNKPEKYEDELAGIARKIANKLKGSPLAARTVGRLLYKNLSH	no	16,1,6,4,5,3,12,2,7,9,11,11,11,11	yes	3.1e-36	0.011	NA	NA	NA	226	391	737	no	no	NA	NA	NA
Hordeum vulgare	HORVU1Hr1G090330.2	CNL	complete	HORVU1Hr1G090330.2:73	HORVU1Hr1G090330.2:1344	ATNTQTVSVLPIVGPGGIGKTTFTTHLYNDSRTQDHFQVRVWVCVSTDFDVLKLTREILGCIPATDEEGSSGVPNGTTNLDQLQRSIAHRLKSKRFLIVLDDIWKCDGEDQWKTLLAPFTKGEAKGSMLLVTTRFPKVADMVKTLDPLELRGLESNDFITFFEACIFGEDNKPEKYEDELAGIARKIANKLKGSPLAARTVGRLLYKNLSH	no	16,1,6,4,5,3,12,2,7,9,11,11,11,11	yes	3.2e-36	0.015	NA	NA	NA	246	391	737	no	no	NA	NA	NA
Hordeum vulgare	HORVU1Hr1G090330.3	CNL	complete	HORVU1Hr1G090330.3:73	HORVU1Hr1G090330.3:1344	ATNTQTVSVLPIVGPGGIGKTTFTTHLYNDSRTQDHFQVRVWVCVSTDFDVLKLTREILGCIPATDEEGSSGVPNGTTNLDQLQRSIAHRLKSKRFLIVLDDIWKCDGEDQWKTLLAPFTKGEAKGSMLLVTTRFPKVADMVKTLDPLELRGLESNDFITFFEACIFGEDNKPEKYEDELAGIARKIANKLKGSPLAARTVGRLLYKNLSH	no	16,1,6,4,5,3,12,2,7,9,11,11,11,11	yes	3.2e-36	0.015	NA	NA	NA	246	391	737	no	no	yes	NA	NA
Hordeum vulgare	HORVU1Hr1G090330.4	CNL	complete	HORVU1Hr1G090330.4:73	HORVU1Hr1G090330.4:1344	ATNTQTVSVLPIVGPGGIGKTTFTTHLYNDSRTQDHFQVRVWVCVSTDFDVLKLTREILGCIPATDEEGSSGVPNGTTNLDQLQRSIAHRLKSKRFLIVLDDIWKCDGEDQWKTLLAPFTKGEAKGSMLLVTTRFPKVADMVKTLDPLELRGLESNDFITFFEACIFGEDNKPEKYEDELAGIARKIANKLKGSPLAARTVGRLLYKNLSH	no	16,1,6,4,5,3,12,2,7,9,11,11,11,11	yes	3.2e-36	0.015	NA	NA	NA	246	391	737	no	no	NA	NA	NA
Hordeum vulgare	HORVU1Hr1G090330.5	CNL	complete	HORVU1Hr1G090330.5:73	HORVU1Hr1G090330.5:1344	ATNTQTVSVLPIVGPGGIGKTTFTTHLYNDSRTQDHFQVRVWVCVSTDFDVLKLTREILGCIPATDEEGSSGVPNGTTNLDQLQRSIAHRLKSKRFLIVLDDIWKCDGEDQWKTLLAPFTKGEAKGSMLLVTTRFPKVADMVKTLDPLELRGLESNDFITFFEACIFGEDNKPEKYEDELAGIARKIANKLKGSPLAARTVGRLLYKNLSH	no	16,1,6,4,5,3,12,2,7,9,11,11,11,11	yes	3.2e-36	0.015	NA	NA	NA	246	391	737	no	no	NA	NA	NA
Hordeum vulgare	HORVU1Hr1G090330.6	CNL	complete	HORVU1Hr1G090330.6:73	HORVU1Hr1G090330.6:1344	ATNTQTVSVLPIVGPGGIGKTTFTTHLYNDSRTQDHFQVRVWVCVSTDFDVLKLTREILGCIPATDEEGSSGVPNGTTNLDQLQRSIAHRLKSKRFLIVLDDIWKCDGEDQWKTLLAPFTKGEAKGSMLLVTTRFPKVADMVKTLDPLELRGLESNDFITFFEACIFGEDNKPEKYEDELAGIARKIANKLKGSPLAARTVGRLLYKNLSH	no	16,1,6,4,5,3,12,2,7,9,11,11,11,11	yes	3.2e-36	0.015	NA	NA	NA	246	391	737	no	no	NA	NA	NA
Hordeum vulgare	HORVU1Hr1G090330.7	CNL	complete	HORVU1Hr1G090330.7:73	HORVU1Hr1G090330.7:1344	ATNTQTVSVLPIVGPGGIGKTTFTTHLYNDSRTQDHFQVRVWVCVSTDFDVLKLTREILGCIPATDEEGSSGVPNGTTNLDQLQRSIAHRLKSKRFLIVLDDIWKCDGEDQWKTLLAPFTKGEAKGSMLLVTTRFPKVADMVKTLDPLELRGLESNDFITFFEACIFGEDNKPEKYEDELAGIARKIANKLKGSPLAARTVGRLLYKNLSH	no	16,1,6,4,5,3,12,2,7,9,11,11,11,11	yes	3.2e-36	0.015	NA	NA	NA	246	391	737	no	no	NA	NA	NA
Hordeum vulgare	HORVU1Hr1G090330.8	CNL	complete	HORVU1Hr1G090330.8:73	HORVU1Hr1G090330.8:1344	ATNTQTVSVLPIVGPGGIGKTTFTTHLYNDSRTQDHFQVRVWVCVSTDFDVLKLTREILGCIPATDEEGSSGVPNGTTNLDQLQRSIAHRLKSKRFLIVLDDIWKCDGEDQWKTLLAPFTKGEAKGSMLLVTTRFPKVADMVKTLDPLELRGLESNDFITFFEACIFGEDNKPEKYEDELAGIARKIANKLKGSPLAARTVGRLLYKNLSH	no	16,1,6,4,5,3,12,2,7,9,11,11,11,11	yes	3.2e-36	0.015	NA	NA	NA	246	391	737	no	no	NA	NA	NA
Hordeum vulgare	HORVU1Hr1G090330.9	CNL	complete	HORVU1Hr1G090330.9:73	HORVU1Hr1G090330.9:1344	ATNTQTVSVLPIVGPGGIGKTTFTTHLYNDSRTQDHFQVRVWVCVSTDFDVLKLTREILGCIPATDEEGSSGVPNGTTNLDQLQRSIAHRLKSKRFLIVLDDIWKCDGEDQWKTLLAPFTKGEAKGSMLLVTTRFPKVADMVKTLDPLELRGLESNDFITFFEACIFGEDNKPEKYEDELAGIARKIANKLKGSPLAARTVGRLLYKNLSH	no	16,1,6,4,5,3,12,2,7,9,11,11,11,11	yes	3.2e-36	0.015	NA	NA	NA	246	391	737	no	no	NA	NA	NA
Hordeum vulgare	HORVU1Hr1G092920.1	CNL	partial	HORVU1Hr1G092920.1:1	HORVU1Hr1G092920.1:442	MIQGMGGSGKSTLARSIYRKQDVTLCHAWISTSRNRQVEDILTNIIDKLDIGSDEHDNSDCEGMVKTIQTYLQNRKYLIVLDDLWDRESWSCFDNAFPKNSHGSIVIITTRNEAVASLAEEEHTIRLGNLSEEESWDLFSKKAFMKLPEATCPDGLISCAKKILEKCQGLPLAIAAIGSLLSYRGMEEREWKSFYNQLNWQ	no	1,4,5,10,3,12,2,8,7,9,9,9	NA	1.6e-49	2.4e-05	NA	NA	NA	NA	NA	NA	NA	NA	NA	NA	NA
Hordeum vulgare	HORVU1Hr1G092920.2	CNL	partial	HORVU1Hr1G092920.2:79	HORVU1Hr1G092920.2:643	NDAGPDRAIIMIQGMGGSGKSTLARSIYRKQDVTLCHAWISTSRNRQVEDILTNIIDKLDIGSDEHDNSDCEGMVKTIQTYLQNRKYLIVLDDLWDRESWSCFDNAFPKNSHGSIVIITTRNEAVASLAEEEHTIRLGNLSEEESWDLFSKKAFMKLPEATCPDGLISCAKKILEKCQGLPLAIAAIGSLLSYRGMEEREWKSFYNQLNWQ	no	16,1,4,5,10,3,12,2,8,7,9,9,9	yes	4e-53	7e-05	NA	NA	NA	180	370	349	no	no	NA	NA	NA
Hordeum vulgare	HORVU1Hr1G092920.3	CNL	partial	HORVU1Hr1G092920.3:1	HORVU1Hr1G092920.3:442	MIQGMGGSGKSTLARSIYRKQDVTLCHAWISTSRNRQVEDILTNIIDKLDIGSDEHDNSDCEGMVKTIQTYLQNRKYLIVLDDLWDRESWSCFDNAFPKNSHGSIVIITTRNEAVASLAEEEHTIRLGNLSEEESWDLFSKKAFMKLPEATCPDGLISCAKKILEKCQGLPLAIAAIGSLLSYRGMEEREWKSFYNQLNWQ	no	1,4,5,10,3,12,2,8,7,9,9,9	NA	1.6e-49	2.4e-05	NA	NA	NA	NA	NA	NA	NA	NA	NA	NA	NA
Hordeum vulgare	HORVU1Hr1G092920.4	CNL	partial	HORVU1Hr1G092920.4:1	HORVU1Hr1G092920.4:442	MIQGMGGSGKSTLARSIYRKQDVTLCHAWISTSRNRQVEDILTNIIDKLDIGSDEHDNSDCEGMVKTIQTYLQNRKYLIVLDDLWDRESWSCFDNAFPKNSHGSIVIITTRNEAVASLAEEEHTIRLGNLSEEESWDLFSKKAFMKLPEATCPDGLISCAKKILEKCQGLPLAIAAIGSLLSYRGMEEREWKSFYNQLNWQ	no	1,4,5,10,3,12,2,8,7,9,9,9	NA	1.6e-49	2.4e-05	NA	NA	NA	NA	NA	NA	NA	NA	NA	NA	NA
Hordeum vulgare	HORVU1Hr1G092920.5	CNL	partial	HORVU1Hr1G092920.5:79	HORVU1Hr1G092920.5:590	KERCPDRAIIMIQGMGGSGKSTLARSIYRKQDVTLCHAWISTSRNRQVEDILTNIIDKLDIGSDEHDNSDCEGMVKTIQTYLQNRKYLIVLDDLWDRESWSCFDNAFPKNSHGSIVIITTRNEAVASLAEEEHTIRLGNLSEEESWDLFSKKAFMKLPEATCPDGLISCAKKILEKCQGLPLAIAAIGSLLSYRGMEEREWKSFYNQLNWQ	no	16,1,4,5,10,3,12,2,8,7,9,9,9	yes	1.1e-51	6.6e-05	NA	NA	NA	142	355	349	no	no	yes	NA	NA
Hordeum vulgare	HORVU1Hr1G094210.1	CNL	partial	HORVU1Hr1G094210.1:75	HORVU1Hr1G094210.1:331	KSMKKEITILPIYGIGGLGKTTLAKMVYNSFQFREYSQVWVYVSQTFDLKKIGNSIISQLSQKENESGYTGKQMIHNSLQKLIANKNILIVLDDLWEDNNSHLEELMGWLKVEESGKVVVIVTTRYEGIAKKICTIQPHKLAPLTDDQCWNIIKQKSDFELRGDKEELHHIGQDIASKCRGVALAAQSLGHMLHSLSFDEWESVKNSDFWN	no	1,6,4,5,3,2	NA	2.1e-39	NA	NA	NA	NA	NA	NA	NA	NA	NA	NA	NA	NA
Hordeum vulgare	HORVU1Hr1G094320.1	CNL	complete	HORVU1Hr1G094320.1:15	HORVU1Hr1G094320.1:859	MDARKKLKVVSIVGFGGLGKTTLAKQVYDKIGSLFDSKAFFSVSQRPDMTELLNSFQLKLGMRDPDTSRPRKVEDIIEELRQHLKEKRYLIVVDDVWDQSTWNTIKCAFPEDINGSRVIVTTRVEDVAAAACQNDGEGIYKMKPLSEQNSRMLLLNRVFGSKNDCPPQLKEVMAEILKKCHGLPLAVITIASLLANKETSRKCWESIRDSL	no	17,16,14,1,6,4,5,10,3,12,2,8,7,11,9,9,9,11	yes	2.7e-52	0.011	NA	NA	NA	168	380	326	no	no	yes	NA	NA
Hordeum vulgare	HORVU2Hr1G000510.1	CNL	partial	HORVU2Hr1G000510.1:271	HORVU2Hr1G000510.1:1428	QDRDKSLTVLPVVGPGGIGKTTLMQHIYHNQQVQNHFPVKFWICVSLNFNLEKVLEQIETSTPKVENERKGSTTEELIEQRLKSKRFLLVLDDIWQLSNEDDWGKLLLILDKSQEKGSMILVTTRFQAIAEKVKTTGQSIKLNGLEPEEFRKLFLAFIFGDEQYPKDKHFLFETGDKIMEKLKGSPLAAKTVGRLLSKDISLGHWKRVLKS	no	1,6,4,5,10,3,12,2,7,11,11,11,11	yes	1.2e-41	NA	NA	NA	NA	NA	NA	NA	NA	NA	NA	NA	NA
Hordeum vulgare	HORVU2Hr1G000510.12	CNL	partial	HORVU2Hr1G000510.12:374	HORVU2Hr1G000510.12:1531	QDRDKSLTVLPVVGPGGIGKTTLMQHIYHNQQVQNHFPVKFWICVSLNFNLEKVLEQIETSTPKVENERKGSTTEELIEQRLKSKRFLLVLDDIWQLSNEDDWGKLLLILDKSQEKGSMILVTTRFQAIAEKVKTTGQSIKLNGLEPEEFRKLFLAFIFGDEQYPKDKHFLFETGDKIMEKLKGSPLAAKTVGRLLSKDISLGHWKRVLKS	no	1,6,4,5,10,3,12,2,7,11,11,11,11	yes	1.3e-41	NA	NA	NA	NA	NA	NA	NA	NA	NA	NA	NA	NA
Hordeum vulgare	HORVU2Hr1G000510.15	CNL	partial	HORVU2Hr1G000510.15:304	HORVU2Hr1G000510.15:1461	QDRDKSLTVLPVVGPGGIGKTTLMQHIYHNQQVQNHFPVKFWICVSLNFNLEKVLEQIETSTPKVENERKGSTTEELIEQRLKSKRFLLVLDDIWQLSNEDDWGKLLLILDKSQEKGSMILVTTRFQAIAEKVKTTGQSIKLNGLEPEEFRKLFLAFIFGDEQYPKDKHFLFETGDKIMEKLKGSPLAAKTVGRLLSKDISLGHWKRVLKS	no	1,6,4,5,10,3,12,2,7,11,11,11,11	yes	1.3e-41	NA	NA	NA	NA	NA	NA	NA	NA	NA	NA	NA	NA
Hordeum vulgare	HORVU2Hr1G000510.16	CNL	partial	HORVU2Hr1G000510.16:378	HORVU2Hr1G000510.16:1535	QDRDKSLTVLPVVGPGGIGKTTLMQHIYHNQQVQNHFPVKFWICVSLNFNLEKVLEQIETSTPKVENERKGSTTEELIEQRLKSKRFLLVLDDIWQLSNEDDWGKLLLILDKSQEKGSMILVTTRFQAIAEKVKTTGQSIKLNGLEPEEFRKLFLAFIFGDEQYPKDKHFLFETGDKIMEKLKGSPLAAKTVGRLLSKDISLGHWKRVLKS	no	1,6,4,5,10,3,12,2,7,11,11,11,11	yes	1.3e-41	NA	NA	NA	NA	NA	NA	NA	NA	NA	NA	NA	NA
Hordeum vulgare	HORVU2Hr1G000510.17	CNL	partial	HORVU2Hr1G000510.17:275	HORVU2Hr1G000510.17:1432	QDRDKSLTVLPVVGPGGIGKTTLMQHIYHNQQVQNHFPVKFWICVSLNFNLEKVLEQIETSTPKVENERKGSTTEELIEQRLKSKRFLLVLDDIWQLSNEDDWGKLLLILDKSQEKGSMILVTTRFQAIAEKVKTTGQSIKLNGLEPEEFRKLFLAFIFGDEQYPKDKHFLFETGDKIMEKLKGSPLAAKTVGRLLSKDISLGHWKRVLKS	no	1,6,4,5,10,3,12,2,7,11,11,11,11	yes	1.2e-41	NA	NA	NA	NA	NA	NA	NA	NA	NA	NA	NA	NA
Hordeum vulgare	HORVU2Hr1G000510.18	CNL	partial	HORVU2Hr1G000510.18:404	HORVU2Hr1G000510.18:1561	QDRDKSLTVLPVVGPGGIGKTTLMQHIYHNQQVQNHFPVKFWICVSLNFNLEKVLEQIETSTPKVENERKGSTTEELIEQRLKSKRFLLVLDDIWQLSNEDDWGKLLLILDKSQEKGSMILVTTRFQAIAEKVKTTGQSIKLNGLEPEEFRKLFLAFIFGDEQYPKDKHFLFETGDKIMEKLKGSPLAAKTVGRLLSKDISLGHWKRVLKS	no	1,6,4,5,10,3,12,2,7,11,11,11,11	yes	1.3e-41	NA	NA	NA	NA	NA	NA	NA	NA	NA	NA	NA	NA
Hordeum vulgare	HORVU2Hr1G000510.2	CNL	partial	HORVU2Hr1G000510.2:275	HORVU2Hr1G000510.2:1432	QDRDKSLTVLPVVGPGGIGKTTLMQHIYHNQQVQNHFPVKFWICVSLNFNLEKVLEQIETSTPKVENERKGSTTEELIEQRLKSKRFLLVLDDIWQLSNEDDWGKLLLILDKSQEKGSMILVTTRFQAIAEKVKTTGQSIKLNGLEPEEFRKLFLAFIFGDEQYPKDKHFLFETGDKIMEKLKGSPLAAKTVGRLLSKDISLGHWKRVLKS	no	1,6,4,5,10,3,12,2,7,11,11,11,11	yes	1.2e-41	NA	NA	NA	NA	NA	NA	NA	NA	NA	NA	NA	NA
Hordeum vulgare	HORVU2Hr1G000510.20	CNL	partial	HORVU2Hr1G000510.20:275	HORVU2Hr1G000510.20:1432	QDRDKSLTVLPVVGPGGIGKTTLMQHIYHNQQVQNHFPVKFWICVSLNFNLEKVLEQIETSTPKVENERKGSTTEELIEQRLKSKRFLLVLDDIWQLSNEDDWGKLLLILDKSQEKGSMILVTTRFQAIAEKVKTTGQSIKLNGLEPEEFRKLFLAFIFGDEQYPKDKHFLFETGDKIMEKLKGSPLAAKTVGRLLSKDISLGHWKRVLKS	no	1,6,4,5,10,3,12,2,7,11,11,11,11	yes	1.2e-41	NA	NA	NA	NA	NA	NA	NA	NA	NA	NA	NA	NA
Hordeum vulgare	HORVU2Hr1G000510.21	CNL	partial	HORVU2Hr1G000510.21:354	HORVU2Hr1G000510.21:1511	QDRDKSLTVLPVVGPGGIGKTTLMQHIYHNQQVQNHFPVKFWICVSLNFNLEKVLEQIETSTPKVENERKGSTTEELIEQRLKSKRFLLVLDDIWQLSNEDDWGKLLLILDKSQEKGSMILVTTRFQAIAEKVKTTGQSIKLNGLEPEEFRKLFLAFIFGDEQYPKDKHFLFETGDKIMEKLKGSPLAAKTVGRLLSKDISLGHWKRVLKS	no	1,6,4,5,10,3,12,2,7,11,11,11,11	yes	1.4e-41	NA	NA	NA	NA	NA	NA	NA	NA	NA	NA	NA	NA
Hordeum vulgare	HORVU2Hr1G000510.23	CNL	partial	HORVU2Hr1G000510.23:275	HORVU2Hr1G000510.23:1432	QDRDKSLTVLPVVGPGGIGKTTLMQHIYHNQQVQNHFPVKFWICVSLNFNLEKVLEQIETSTPKVENERKGSTTEELIEQRLKSKRFLLVLDDIWQLSNEDDWGKLLLILDKSQEKGSMILVTTRFQAIAEKVKTTGQSIKLNGLEPEEFRKLFLAFIFGDEQYPKDKHFLFETGDKIMEKLKGSPLAAKTVGRLLSKDISLGHWKRVLKS	no	1,6,4,5,10,3,12,2,7,11,11,11,11	yes	1.2e-41	NA	NA	NA	NA	NA	NA	NA	NA	NA	NA	NA	NA
Hordeum vulgare	HORVU2Hr1G000510.25	CNL	partial	HORVU2Hr1G000510.25:275	HORVU2Hr1G000510.25:1432	QDRDKSLTVLPVVGPGGIGKTTLMQHIYHNQQVQNHFPVKFWICVSLNFNLEKVLEQIETSTPKVENERKGSTTEELIEQRLKSKRFLLVLDDIWQLSNEDDWGKLLLILDKSQEKGSMILVTTRFQAIAEKVKTTGQSIKLNGLEPEEFRKLFLAFIFGDEQYPKDKHFLFETGDKIMEKLKGSPLAAKTVGRLLSKDISLGHWKRVLKS	no	1,6,4,5,10,3,12,2,7,11,11,11,11	yes	1.2e-41	NA	NA	NA	NA	NA	NA	NA	NA	NA	NA	NA	NA
Hordeum vulgare	HORVU2Hr1G000510.26	CNL	partial	HORVU2Hr1G000510.26:275	HORVU2Hr1G000510.26:1432	QDRDKSLTVLPVVGPGGIGKTTLMQHIYHNQQVQNHFPVKFWICVSLNFNLEKVLEQIETSTPKVENERKGSTTEELIEQRLKSKRFLLVLDDIWQLSNEDDWGKLLLILDKSQEKGSMILVTTRFQAIAEKVKTTGQSIKLNGLEPEEFRKLFLAFIFGDEQYPKDKHFLFETGDKIMEKLKGSPLAAKTVGRLLSKDISLGHWKRVLKS	no	1,6,4,5,10,3,12,2,7,11,11,11,11	yes	1.2e-41	NA	NA	NA	NA	NA	NA	NA	NA	NA	NA	NA	NA
Hordeum vulgare	HORVU2Hr1G000510.27	CNL	partial	HORVU2Hr1G000510.27:400	HORVU2Hr1G000510.27:1557	QDRDKSLTVLPVVGPGGIGKTTLMQHIYHNQQVQNHFPVKFWICVSLNFNLEKVLEQIETSTPKVENERKGSTTEELIEQRLKSKRFLLVLDDIWQLSNEDDWGKLLLILDKSQEKGSMILVTTRFQAIAEKVKTTGQSIKLNGLEPEEFRKLFLAFIFGDEQYPKDKHFLFETGDKIMEKLKGSPLAAKTVGRLLSKDISLGHWKRVLKS	no	1,6,4,5,10,3,12,2,7,11,11,11,11	yes	1.3e-41	NA	NA	NA	NA	NA	NA	NA	NA	NA	NA	NA	NA
Hordeum vulgare	HORVU2Hr1G000510.28	CNL	partial	HORVU2Hr1G000510.28:275	HORVU2Hr1G000510.28:1432	QDRDKSLTVLPVVGPGGIGKTTLMQHIYHNQQVQNHFPVKFWICVSLNFNLEKVLEQIETSTPKVENERKGSTTEELIEQRLKSKRFLLVLDDIWQLSNEDDWGKLLLILDKSQEKGSMILVTTRFQAIAEKVKTTGQSIKLNGLEPEEFRKLFLAFIFGDEQYPKDKHFLFETGDKIMEKLKGSPLAAKTVGRLLSKDISLGHWKRVLKS	no	1,6,4,5,10,3,12,2,7,11,11,11,11	yes	1.2e-41	NA	NA	NA	NA	NA	NA	NA	NA	NA	NA	NA	NA
Hordeum vulgare	HORVU2Hr1G000510.3	CNL	partial	HORVU2Hr1G000510.3:275	HORVU2Hr1G000510.3:1432	QDRDKSLTVLPVVGPGGIGKTTLMQHIYHNQQVQNHFPVKFWICVSLNFNLEKVLEQIETSTPKVENERKGSTTEELIEQRLKSKRFLLVLDDIWQLSNEDDWGKLLLILDKSQEKGSMILVTTRFQAIAEKVKTTGQSIKLNGLEPEEFRKLFLAFIFGDEQYPKDKHFLFETGDKIMEKLKGSPLAAKTVGRLLSKDISLGHWKRVLKS	no	1,6,4,5,10,3,12,2,7,11,11,11,11	yes	1.2e-41	NA	NA	NA	NA	NA	NA	NA	NA	NA	NA	NA	NA
Hordeum vulgare	HORVU2Hr1G000510.30	CNL	partial	HORVU2Hr1G000510.30:390	HORVU2Hr1G000510.30:1547	QDRDKSLTVLPVVGPGGIGKTTLMQHIYHNQQVQNHFPVKFWICVSLNFNLEKVLEQIETSTPKVENERKGSTTEELIEQRLKSKRFLLVLDDIWQLSNEDDWGKLLLILDKSQEKGSMILVTTRFQAIAEKVKTTGQSIKLNGLEPEEFRKLFLAFIFGDEQYPKDKHFLFETGDKIMEKLKGSPLAAKTVGRLLSKDISLGHWKRVLKS	no	1,6,4,5,10,3,12,2,7,11,11,11,11	yes	1.4e-41	NA	NA	NA	NA	NA	NA	NA	NA	NA	NA	NA	NA
Hordeum vulgare	HORVU2Hr1G000510.31	CNL	partial	HORVU2Hr1G000510.31:390	HORVU2Hr1G000510.31:1547	QDRDKSLTVLPVVGPGGIGKTTLMQHIYHNQQVQNHFPVKFWICVSLNFNLEKVLEQIETSTPKVENERKGSTTEELIEQRLKSKRFLLVLDDIWQLSNEDDWGKLLLILDKSQEKGSMILVTTRFQAIAEKVKTTGQSIKLNGLEPEEFRKLFLAFIFGDEQYPKDKHFLFETGDKIMEKLKGSPLAAKTVGRLLSKDISLGHWKRVLKS	no	1,6,4,5,10,3,12,2,7,11,11,11,11	yes	1.4e-41	NA	NA	NA	NA	NA	NA	NA	NA	NA	NA	NA	NA
Hordeum vulgare	HORVU2Hr1G000510.32	CNL	partial	HORVU2Hr1G000510.32:390	HORVU2Hr1G000510.32:1547	QDRDKSLTVLPVVGPGGIGKTTLMQHIYHNQQVQNHFPVKFWICVSLNFNLEKVLEQIETSTPKVENERKGSTTEELIEQRLKSKRFLLVLDDIWQLSNEDDWGKLLLILDKSQEKGSMILVTTRFQAIAEKVKTTGQSIKLNGLEPEEFRKLFLAFIFGDEQYPKDKHFLFETGDKIMEKLKGSPLAAKTVGRLLSKDISLGHWKRVLKS	no	1,6,4,5,10,3,12,2,7,11,11,11,11	yes	1.4e-41	NA	NA	NA	NA	NA	NA	NA	NA	NA	NA	NA	NA
Hordeum vulgare	HORVU2Hr1G000510.35	CNL	partial	HORVU2Hr1G000510.35:359	HORVU2Hr1G000510.35:1516	QDRDKSLTVLPVVGPGGIGKTTLMQHIYHNQQVQNHFPVKFWICVSLNFNLEKVLEQIETSTPKVENERKGSTTEELIEQRLKSKRFLLVLDDIWQLSNEDDWGKLLLILDKSQEKGSMILVTTRFQAIAEKVKTTGQSIKLNGLEPEEFRKLFLAFIFGDEQYPKDKHFLFETGDKIMEKLKGSPLAAKTVGRLLSKDISLGHWKRVLKS	no	1,6,4,5,10,3,12,2,7,11,11,11,11	yes	1.4e-41	NA	NA	NA	NA	NA	NA	NA	NA	NA	NA	NA	NA
Hordeum vulgare	HORVU2Hr1G000510.36	CNL	partial	HORVU2Hr1G000510.36:275	HORVU2Hr1G000510.36:1432	QDRDKSLTVLPVVGPGGIGKTTLMQHIYHNQQVQNHFPVKFWICVSLNFNLEKVLEQIETSTPKVENERKGSTTEELIEQRLKSKRFLLVLDDIWQLSNEDDWGKLLLILDKSQEKGSMILVTTRFQAIAEKVKTTGQSIKLNGLEPEEFRKLFLAFIFGDEQYPKDKHFLFETGDKIMEKLKGSPLAAKTVGRLLSKDISLGHWKRVLKS	no	1,6,4,5,10,3,12,2,7,11,11,11,11	yes	1.2e-41	NA	NA	NA	NA	NA	NA	NA	NA	NA	NA	NA	NA
Hordeum vulgare	HORVU2Hr1G000510.37	CNL	partial	HORVU2Hr1G000510.37:275	HORVU2Hr1G000510.37:1432	QDRDKSLTVLPVVGPGGIGKTTLMQHIYHNQQVQNHFPVKFWICVSLNFNLEKVLEQIETSTPKVENERKGSTTEELIEQRLKSKRFLLVLDDIWQLSNEDDWGKLLLILDKSQEKGSMILVTTRFQAIAEKVKTTGQSIKLNGLEPEEFRKLFLAFIFGDEQYPKDKHFLFETGDKIMEKLKGSPLAAKTVGRLLSKDISLGHWKRVLKS	no	1,6,4,5,10,3,12,2,7,11,11,11,11	yes	1.2e-41	NA	NA	NA	NA	NA	NA	NA	NA	NA	NA	NA	NA
Hordeum vulgare	HORVU2Hr1G000510.38	CNL	partial	HORVU2Hr1G000510.38:305	HORVU2Hr1G000510.38:1462	QDRDKSLTVLPVVGPGGIGKTTLMQHIYHNQQVQNHFPVKFWICVSLNFNLEKVLEQIETSTPKVENERKGSTTEELIEQRLKSKRFLLVLDDIWQLSNEDDWGKLLLILDKSQEKGSMILVTTRFQAIAEKVKTTGQSIKLNGLEPEEFRKLFLAFIFGDEQYPKDKHFLFETGDKIMEKLKGSPLAAKTVGRLLSKDISLGHWKRVLKS	no	1,6,4,5,10,3,12,2,7,11,11,11,11	yes	1.3e-41	NA	NA	NA	NA	NA	NA	NA	NA	NA	NA	NA	NA
Hordeum vulgare	HORVU2Hr1G000510.4	CNL	partial	HORVU2Hr1G000510.4:268	HORVU2Hr1G000510.4:1425	QDRDKSLTVLPVVGPGGIGKTTLMQHIYHNQQVQNHFPVKFWICVSLNFNLEKVLEQIETSTPKVENERKGSTTEELIEQRLKSKRFLLVLDDIWQLSNEDDWGKLLLILDKSQEKGSMILVTTRFQAIAEKVKTTGQSIKLNGLEPEEFRKLFLAFIFGDEQYPKDKHFLFETGDKIMEKLKGSPLAAKTVGRLLSKDISLGHWKRVLKS	no	1,6,4,5,10,3,12,2,7,11,11,11,11	yes	1.2e-41	NA	NA	NA	NA	NA	NA	NA	NA	NA	NA	NA	NA
Hordeum vulgare	HORVU2Hr1G000510.5	CNL	partial	HORVU2Hr1G000510.5:393	HORVU2Hr1G000510.5:1550	QDRDKSLTVLPVVGPGGIGKTTLMQHIYHNQQVQNHFPVKFWICVSLNFNLEKVLEQIETSTPKVENERKGSTTEELIEQRLKSKRFLLVLDDIWQLSNEDDWGKLLLILDKSQEKGSMILVTTRFQAIAEKVKTTGQSIKLNGLEPEEFRKLFLAFIFGDEQYPKDKHFLFETGDKIMEKLKGSPLAAKTVGRLLSKDISLGHWKRVLKS	no	1,6,4,5,10,3,12,2,7,11,11,11,11	yes	1.4e-41	NA	NA	NA	NA	NA	NA	NA	NA	NA	NA	NA	NA
Hordeum vulgare	HORVU2Hr1G000510.6	CNL	partial	HORVU2Hr1G000510.6:393	HORVU2Hr1G000510.6:1550	QDRDKSLTVLPVVGPGGIGKTTLMQHIYHNQQVQNHFPVKFWICVSLNFNLEKVLEQIETSTPKVENERKGSTTEELIEQRLKSKRFLLVLDDIWQLSNEDDWGKLLLILDKSQEKGSMILVTTRFQAIAEKVKTTGQSIKLNGLEPEEFRKLFLAFIFGDEQYPKDKHFLFETGDKIMEKLKGSPLAAKTVGRLLSKDISLGHWKRVLKS	no	1,6,4,5,10,3,12,2,7,11,11,11,11	yes	1.4e-41	NA	NA	NA	NA	NA	NA	NA	NA	NA	NA	NA	NA
Hordeum vulgare	HORVU2Hr1G000560.1	CNL	partial	HORVU2Hr1G000560.1:301	HORVU2Hr1G000560.1:1178	QYRDKSLTVLPVVGPGGMGKTTLIQHIYHDQQVQNHFPVMIWICVSFNFNLDKVFEQIKVGTRPVESEKEGSTIEELIEERLKSKRFLLVLDDIWQISNVGDWEKLMSILNQSQEKGSMVLVTTRFQAIAQKVKPTGHSIELDGLKSEEFRKLFLAFIFGDEQCPRDKHFLLETADKIMEKLKGSPLAAKTVGRLLSKEHSLYHWKRVLKS	no	1,6,4,5,10,3,12,2,8,7,19,11,11,11	yes	1.5e-42	NA	NA	NA	NA	NA	NA	NA	NA	NA	NA	NA	NA
Hordeum vulgare	HORVU2Hr1G000560.10	CNL	partial	HORVU2Hr1G000560.10:299	HORVU2Hr1G000560.10:1176	QYRDKSLTVLPVVGPGGMGKTTLIQHIYHDQQVQNHFPVMIWICVSFNFNLDKVFEQIKVGTRPVESEKEGSTIEELIEERLKSKRFLLVLDDIWQISNVGDWEKLMSILNQSQEKGSMVLVTTRFQAIAQKVKPTGHSIELDGLKSEEFRKLFLAFIFGDEQCPRDKHFLLETADKIMEKLKGSPLAAKTVGRLLSKEHSLYHWKRVLKS	no	1,6,4,5,10,3,12,2,8,7,19,11,11,11	yes	1.5e-42	NA	NA	NA	NA	NA	NA	NA	NA	NA	NA	NA	NA
Hordeum vulgare	HORVU2Hr1G000560.11	CNL	partial	HORVU2Hr1G000560.11:303	HORVU2Hr1G000560.11:1180	QYRDKSLTVLPVVGPGGMGKTTLIQHIYHDQQVQNHFPVMIWICVSFNFNLDKVFEQIKVGTRPVESEKEGSTIEELIEERLKSKRFLLVLDDIWQISNVGDWEKLMSILNQSQEKGSMVLVTTRFQAIAQKVKPTGHSIELDGLKSEEFRKLFLAFIFGDEQCPRDKHFLLETADKIMEKLKGSPLAAKTVGRLLSKEHSLYHWKRVLKS	no	1,6,4,5,10,3,12,2,8,7,19,11,11,11	yes	1.5e-42	NA	NA	NA	NA	NA	NA	NA	NA	NA	NA	NA	NA
Hordeum vulgare	HORVU2Hr1G000560.12	CNL	partial	HORVU2Hr1G000560.12:301	HORVU2Hr1G000560.12:1178	QYRDKSLTVLPVVGPGGMGKTTLIQHIYHDQQVQNHFPVMIWICVSFNFNLDKVFEQIKVGTRPVESEKEGSTIEELIEERLKSKRFLLVLDDIWQISNVGDWEKLMSILNQSQEKGSMVLVTTRFQAIAQKVKPTGHSIELDGLKSEEFRKLFLAFIFGDEQCPRDKHFLLETADKIMEKLKGSPLAAKTVGRLLSKEHSLYHWKRVLKS	no	1,6,4,5,10,3,12,2,8,7,19,11,11,11	yes	1.5e-42	NA	NA	NA	NA	NA	NA	NA	NA	NA	NA	NA	NA
Hordeum vulgare	HORVU2Hr1G000560.13	CNL	partial	HORVU2Hr1G000560.13:301	HORVU2Hr1G000560.13:1178	QYRDKSLTVLPVVGPGGMGKTTLIQHIYHDQQVQNHFPVMIWICVSFNFNLDKVFEQIKVGTRPVESEKEGSTIEELIEERLKSKRFLLVLDDIWQISNVGDWEKLMSILNQSQEKGSMVLVTTRFQAIAQKVKPTGHSIELDGLKSEEFRKLFLAFIFGDEQCPRDKHFLLETADKIMEKLKGSPLAAKTVGRLLSKEHSLYHWKRVLKS	no	1,6,4,5,10,3,12,2,8,7,19,11,11,11	yes	1.5e-42	NA	NA	NA	NA	NA	NA	NA	NA	NA	NA	NA	NA
Hordeum vulgare	HORVU2Hr1G000560.14	CNL	partial	HORVU2Hr1G000560.14:306	HORVU2Hr1G000560.14:1183	QYRDKSLTVLPVVGPGGMGKTTLIQHIYHDQQVQNHFPVMIWICVSFNFNLDKVFEQIKVGTRPVESEKEGSTIEELIEERLKSKRFLLVLDDIWQISNVGDWEKLMSILNQSQEKGSMVLVTTRFQAIAQKVKPTGHSIELDGLKSEEFRKLFLAFIFGDEQCPRDKHFLLETADKIMEKLKGSPLAAKTVGRLLSKEHSLYHWKRVLKS	no	1,6,4,5,10,3,12,2,8,7,19,11,11,11	yes	1.5e-42	NA	NA	NA	NA	NA	NA	NA	NA	NA	NA	NA	NA
Hordeum vulgare	HORVU2Hr1G000560.15	CNL	partial	HORVU2Hr1G000560.15:287	HORVU2Hr1G000560.15:1164	QYRDKSLTVLPVVGPGGMGKTTLIQHIYHDQQVQNHFPVMIWICVSFNFNLDKVFEQIKVGTRPVESEKEGSTIEELIEERLKSKRFLLVLDDIWQISNVGDWEKLMSILNQSQEKGSMVLVTTRFQAIAQKVKPTGHSIELDGLKSEEFRKLFLAFIFGDEQCPRDKHFLLETADKIMEKLKGSPLAAKTVGRLLSKEHSLYHWKRVLKS	no	1,6,4,5,10,3,12,2,8,7,19,11,11,11	yes	1.5e-42	NA	NA	NA	NA	NA	NA	NA	NA	NA	NA	NA	NA
Hordeum vulgare	HORVU2Hr1G000560.16	CNL	partial	HORVU2Hr1G000560.16:307	HORVU2Hr1G000560.16:1184	QYRDKSLTVLPVVGPGGMGKTTLIQHIYHDQQVQNHFPVMIWICVSFNFNLDKVFEQIKVGTRPVESEKEGSTIEELIEERLKSKRFLLVLDDIWQISNVGDWEKLMSILNQSQEKGSMVLVTTRFQAIAQKVKPTGHSIELDGLKSEEFRKLFLAFIFGDEQCPRDKHFLLETADKIMEKLKGSPLAAKTVGRLLSKEHSLYHWKRVLKS	no	1,6,4,5,10,3,12,2,8,7,19,11,11,11	yes	1.6e-42	NA	NA	NA	NA	NA	NA	NA	NA	NA	NA	NA	NA
Hordeum vulgare	HORVU2Hr1G000560.18	CNL	partial	HORVU2Hr1G000560.18:297	HORVU2Hr1G000560.18:1174	QYRDKSLTVLPVVGPGGMGKTTLIQHIYHDQQVQNHFPVMIWICVSFNFNLDKVFEQIKVGTRPVESEKEGSTIEELIEERLKSKRFLLVLDDIWQISNVGDWEKLMSILNQSQEKGSMVLVTTRFQAIAQKVKPTGHSIELDGLKSEEFRKLFLAFIFGDEQCPRDKHFLLETADKIMEKLKGSPLAAKTVGRLLSKEHSLYHWKRVLKS	no	1,6,4,5,10,3,12,2,8,7,19,11,11,11	yes	1.5e-42	NA	NA	NA	NA	NA	NA	NA	NA	NA	NA	NA	NA
Hordeum vulgare	HORVU2Hr1G000560.19	CNL	partial	HORVU2Hr1G000560.19:294	HORVU2Hr1G000560.19:1171	QYRDKSLTVLPVVGPGGMGKTTLIQHIYHDQQVQNHFPVMIWICVSFNFNLDKVFEQIKVGTRPVESEKEGSTIEELIEERLKSKRFLLVLDDIWQISNVGDWEKLMSILNQSQEKGSMVLVTTRFQAIAQKVKPTGHSIELDGLKSEEFRKLFLAFIFGDEQCPRDKHFLLETADKIMEKLKGSPLAAKTVGRLLSKEHSLYHWKRVLKS	no	1,6,4,5,10,3,12,2,8,7,19,11,11,11	yes	1.4e-42	NA	NA	NA	NA	NA	NA	NA	NA	NA	NA	NA	NA
Hordeum vulgare	HORVU2Hr1G000560.2	CNL	partial	HORVU2Hr1G000560.2:301	HORVU2Hr1G000560.2:1178	QYRDKSLTVLPVVGPGGMGKTTLIQHIYHDQQVQNHFPVMIWICVSFNFNLDKVFEQIKVGTRPVESEKEGSTIEELIEERLKSKRFLLVLDDIWQISNVGDWEKLMSILNQSQEKGSMVLVTTRFQAIAQKVKPTGHSIELDGLKSEEFRKLFLAFIFGDEQCPRDKHFLLETADKIMEKLKGSPLAAKTVGRLLSKEHSLYHWKRVLKS	no	1,6,4,5,10,3,12,2,8,7,19,11,11,11	yes	1.5e-42	NA	NA	NA	NA	NA	NA	NA	NA	NA	NA	NA	NA
Hordeum vulgare	HORVU2Hr1G000560.3	CNL	partial	HORVU2Hr1G000560.3:301	HORVU2Hr1G000560.3:1178	QYRDKSLTVLPVVGPGGMGKTTLIQHIYHDQQVQNHFPVMIWICVSFNFNLDKVFEQIKVGTRPVESEKEGSTIEELIEERLKSKRFLLVLDDIWQISNVGDWEKLMSILNQSQEKGSMVLVTTRFQAIAQKVKPTGHSIELDGLKSEEFRKLFLAFIFGDEQCPRDKHFLLETADKIMEKLKGSPLAAKTVGRLLSKEHSLYHWKRVLKS	no	1,6,4,5,10,3,12,2,8,7,19,11,11,11	yes	1.5e-42	NA	NA	NA	NA	NA	NA	NA	NA	NA	NA	NA	NA
Hordeum vulgare	HORVU2Hr1G000560.4	CNL	partial	HORVU2Hr1G000560.4:306	HORVU2Hr1G000560.4:1183	QYRDKSLTVLPVVGPGGMGKTTLIQHIYHDQQVQNHFPVMIWICVSFNFNLDKVFEQIKVGTRPVESEKEGSTIEELIEERLKSKRFLLVLDDIWQISNVGDWEKLMSILNQSQEKGSMVLVTTRFQAIAQKVKPTGHSIELDGLKSEEFRKLFLAFIFGDEQCPRDKHFLLETADKIMEKLKGSPLAAKTVGRLLSKEHSLYHWKRVLKS	no	1,6,4,5,10,3,12,2,8,7,19,11,11,11	yes	1.5e-42	NA	NA	NA	NA	NA	NA	NA	NA	NA	NA	NA	NA
Hordeum vulgare	HORVU2Hr1G000560.5	CNL	partial	HORVU2Hr1G000560.5:306	HORVU2Hr1G000560.5:1183	QYRDKSLTVLPVVGPGGMGKTTLIQHIYHDQQVQNHFPVMIWICVSFNFNLDKVFEQIKVGTRPVESEKEGSTIEELIEERLKSKRFLLVLDDIWQISNVGDWEKLMSILNQSQEKGSMVLVTTRFQAIAQKVKPTGHSIELDGLKSEEFRKLFLAFIFGDEQCPRDKHFLLETADKIMEKLKGSPLAAKTVGRLLSKEHSLYHWKRVLKS	no	1,6,4,5,10,3,12,2,8,7,19,11,11,11	yes	1.5e-42	NA	NA	NA	NA	NA	NA	NA	NA	NA	NA	NA	NA
Hordeum vulgare	HORVU2Hr1G000560.6	CNL	partial	HORVU2Hr1G000560.6:301	HORVU2Hr1G000560.6:1178	QYRDKSLTVLPVVGPGGMGKTTLIQHIYHDQQVQNHFPVMIWICVSFNFNLDKVFEQIKVGTRPVESEKEGSTIEELIEERLKSKRFLLVLDDIWQISNVGDWEKLMSILNQSQEKGSMVLVTTRFQAIAQKVKPTGHSIELDGLKSEEFRKLFLAFIFGDEQCPRDKHFLLETADKIMEKLKGSPLAAKTVGRLLSKEHSLYHWKRVLKS	no	1,6,4,5,10,3,12,2,8,7,19,11,11,11	yes	1.5e-42	NA	NA	NA	NA	NA	NA	NA	NA	NA	NA	NA	NA
Hordeum vulgare	HORVU2Hr1G000560.7	CNL	partial	HORVU2Hr1G000560.7:301	HORVU2Hr1G000560.7:1178	QYRDKSLTVLPVVGPGGMGKTTLIQHIYHDQQVQNHFPVMIWICVSFNFNLDKVFEQIKVGTRPVESEKEGSTIEELIEERLKSKRFLLVLDDIWQISNVGDWEKLMSILNQSQEKGSMVLVTTRFQAIAQKVKPTGHSIELDGLKSEEFRKLFLAFIFGDEQCPRDKHFLLETADKIMEKLKGSPLAAKTVGRLLSKEHSLYHWKRVLKS	no	1,6,4,5,10,3,12,2,8,7,19,11,11,11	yes	1.5e-42	NA	NA	NA	NA	NA	NA	NA	NA	NA	NA	NA	NA
Hordeum vulgare	HORVU2Hr1G000560.8	CNL	partial	HORVU2Hr1G000560.8:303	HORVU2Hr1G000560.8:1180	QYRDKSLTVLPVVGPGGMGKTTLIQHIYHDQQVQNHFPVMIWICVSFNFNLDKVFEQIKVGTRPVESEKEGSTIEELIEERLKSKRFLLVLDDIWQISNVGDWEKLMSILNQSQEKGSMVLVTTRFQAIAQKVKPTGHSIELDGLKSEEFRKLFLAFIFGDEQCPRDKHFLLETADKIMEKLKGSPLAAKTVGRLLSKEHSLYHWKRVLKS	no	1,6,4,5,10,3,12,2,8,7,19,11,11,11	yes	1.5e-42	NA	NA	NA	NA	NA	NA	NA	NA	NA	NA	NA	NA
Hordeum vulgare	HORVU2Hr1G000560.9	CNL	partial	HORVU2Hr1G000560.9:305	HORVU2Hr1G000560.9:1182	QYRDKSLTVLPVVGPGGMGKTTLIQHIYHDQQVQNHFPVMIWICVSFNFNLDKVFEQIKVGTRPVESEKEGSTIEELIEERLKSKRFLLVLDDIWQISNVGDWEKLMSILNQSQEKGSMVLVTTRFQAIAQKVKPTGHSIELDGLKSEEFRKLFLAFIFGDEQCPRDKHFLLETADKIMEKLKGSPLAAKTVGRLLSKEHSLYHWKRVLKS	no	1,6,4,5,10,3,12,2,8,7,19,11,11,11	yes	1.5e-42	NA	NA	NA	NA	NA	NA	NA	NA	NA	NA	NA	NA
Hordeum vulgare	HORVU2Hr1G000700.1	CNL	partial	HORVU2Hr1G000700.1:15	HORVU2Hr1G000700.1:1154	QCCDMGITVLPVIGPGGMGKTTLIQHIYNNQQVQNHFPVRIWICVSFNFNLGKVLEQIKRYTTSVEGENECVRPEELVEHRLKHQRFLLVLDDIWQFTDVDDWKKLLLILNKSQEKGSVILVTTRQKEIADRVKETEEPKELDGLERGEFRKLFLVYVFDAEQYPRDKLHLLDTGDEIMGKLKGSPLAAKTVGRLLRTDHSLAHWRRVLNS	no	17,1,6,4,5,10,3,12,2,8,7,11,11,11,11	yes	2.3e-41	NA	NA	NA	NA	NA	NA	NA	NA	NA	NA	NA	NA
Hordeum vulgare	HORVU2Hr1G000700.2	CNL	partial	HORVU2Hr1G000700.2:15	HORVU2Hr1G000700.2:1154	QCCDMGITVLPVIGPGGMGKTTLIQHIYNNQQVQNHFPVRIWICVSFNFNLGKVLEQIKRYTTSVEGENECVRPEELVEHRLKHQRFLLVLDDIWQFTDVDDWKKLLLILNKSQEKGSVILVTTRQKEIADRVKETEEPKELDGLERGEFRKLFLVYVFDAEQYPRDKLHLLDTGDEIMGKLKGSPLAAKTVGRLLRTDHSLAHWRRVLNS	no	17,1,6,4,5,10,3,12,2,8,7,11,11,11,11	yes	2.3e-41	NA	NA	NA	NA	NA	NA	NA	NA	NA	NA	NA	NA
Hordeum vulgare	HORVU2Hr1G000700.3	CNL	partial	HORVU2Hr1G000700.3:15	HORVU2Hr1G000700.3:1154	QCCDMGITVLPVIGPGGMGKTTLIQHIYNNQQVQNHFPVRIWICVSFNFNLGKVLEQIKRYTTSVEGENECVRPEELVEHRLKHQRFLLVLDDIWQFTDVDDWKKLLLILNKSQEKGSVILVTTRQKEIADRVKETEEPKELDGLERGEFRKLFLVYVFDAEQYPRDKLHLLDTGDEIMGKLKGSPLAAKTVGRLLRTDHSLAHWRRVLNS	no	17,1,6,4,5,10,3,12,2,8,7,11,11,11,11	yes	2.3e-41	NA	NA	NA	NA	NA	NA	NA	NA	NA	NA	NA	NA
Hordeum vulgare	HORVU2Hr1G000700.4	CNL	partial	HORVU2Hr1G000700.4:15	HORVU2Hr1G000700.4:1154	QCCDMGITVLPVIGPGGMGKTTLIQHIYNNQQVQNHFPVRIWICVSFNFNLGKVLEQIKRYTTSVEGENECVRPEELVEHRLKHQRFLLVLDDIWQFTDVDDWKKLLLILNKSQEKGSVILVTTRQKEIADRVKETEEPKELDGLERGEFRKLFLVYVFDAEQYPRDKLHLLDTGDEIMGKLKGSPLAAKTVGRLLRTDHSLAHWRRVLNS	no	17,1,6,4,5,10,3,12,2,8,7,11,11,11,11	yes	2.3e-41	NA	NA	NA	NA	NA	NA	NA	NA	NA	NA	NA	NA
Hordeum vulgare	HORVU2Hr1G000700.5	CNL	partial	HORVU2Hr1G000700.5:15	HORVU2Hr1G000700.5:1154	QCCDMGITVLPVIGPGGMGKTTLIQHIYNNQQVQNHFPVRIWICVSFNFNLGKVLEQIKRYTTSVEGENECVRPEELVEHRLKHQRFLLVLDDIWQFTDVDDWKKLLLILNKSQEKGSVILVTTRQKEIADRVKETEEPKELDGLERGEFRKLFLVYVFDAEQYPRDKLHLLDTGDEIMGKLKGSPLAAKTVGRLLRTDHSLAHWRRVLNS	no	17,1,6,4,5,10,3,12,2,8,7,11,11,11,11	yes	2.3e-41	NA	NA	NA	NA	NA	NA	NA	NA	NA	NA	NA	NA
Hordeum vulgare	HORVU2Hr1G000700.6	CNL	partial	HORVU2Hr1G000700.6:15	HORVU2Hr1G000700.6:1154	QCCDMGITVLPVIGPGGMGKTTLIQHIYNNQQVQNHFPVRIWICVSFNFNLGKVLEQIKRYTTSVEGENECVRPEELVEHRLKHQRFLLVLDDIWQFTDVDDWKKLLLILNKSQEKGSVILVTTRQKEIADRVKETEEPKELDGLERGEFRKLFLVYVFDAEQYPRDKLHLLDTGDEIMGKLKGSPLAAKTVGRLLRTDHSLAHWRRVLNS	no	17,1,6,4,5,10,3,12,2,8,7,11,11,11,11	yes	2.3e-41	NA	NA	NA	NA	NA	NA	NA	NA	NA	NA	NA	NA
Hordeum vulgare	HORVU2Hr1G000700.7	CNL	partial	HORVU2Hr1G000700.7:15	HORVU2Hr1G000700.7:978	QCCDMGITVLPVIGPGGMGKTTLIQHIYNNQQVQNHFPVRIWICVSFNFNLGKVLEQIKRYTTSVEGENECVRPEELVEHRLKHQRFLLVLDDIWQFTDVDDWKKLLLILNKSQEKGSVILVTTRQKEIADRVKETEEPKELDGLERGEFRKLFLVYVFDAEQYPRDKLHLLDTGDEIMGKLKGSPLAAKTVGRLLRTDHSLAHWRRVLNS	no	17,1,6,4,5,10,3,12,2,8,7,11	yes	1.7e-41	NA	NA	NA	NA	NA	NA	NA	NA	NA	NA	NA	NA
Hordeum vulgare	HORVU2Hr1G000700.8	CNL	partial	HORVU2Hr1G000700.8:15	HORVU2Hr1G000700.8:1154	QCCDMGITVLPVIGPGGMGKTTLIQHIYNNQQVQNHFPVRIWICVSFNFNLGKVLEQIKRYTTSVEGENECVRPEELVEHRLKHQRFLLVLDDIWQFTDVDDWKKLLLILNKSQEKGSVILVTTRQKEIADRVKETEEPKELDGLERGEFRKLFLVYVFDAEQYPRDKLHLLDTGDEIMGKLKGSPLAAKTVGRLLRTDHSLAHWRRVLNS	no	17,1,6,4,5,10,3,12,2,8,7,11,11,11,11	yes	2.3e-41	NA	NA	NA	NA	NA	NA	NA	NA	NA	NA	NA	NA
Hordeum vulgare	HORVU2Hr1G000770.10	CNL	partial	HORVU2Hr1G000770.10:278	HORVU2Hr1G000770.10:1151	QYCDKGLTVLPVVGPGGMGKTTLIQHIYHNQQVQNHFPVRIWICVSFNFNLDKVLQEIKRYTLPVEGENGCSTTQELIEHRLKYKRFLLVLDDIWQFTDVDDWKKLLLILSKSQENGSMILVTTRFQEIAKKVRAIGNSIQLNGLEPEEFRKLFLVYVFDDGQCPGNKVHLLNKIMEKLKGSPLAAKTVGRLLRTDPSMSHWRRVLNSEEW	no	1,6,4,5,10,3,12,2,7,19,11,11,11	yes	1.7e-42	NA	NA	NA	NA	NA	NA	NA	NA	NA	NA	NA	NA
Hordeum vulgare	HORVU2Hr1G000770.11	CNL	partial	HORVU2Hr1G000770.11:278	HORVU2Hr1G000770.11:1151	QYCDKGLTVLPVVGPGGMGKTTLIQHIYHNQQVQNHFPVRIWICVSFNFNLDKVLQEIKRYTLPVEGENGCSTTQELIEHRLKYKRFLLVLDDIWQFTDVDDWKKLLLILSKSQENGSMILVTTRFQEIAKKVRAIGNSIQLNGLEPEEFRKLFLVYVFDDGQCPGNKVHLLNKIMEKLKGSPLAAKTVGRLLRTDPSMSHWRRVLNSEEW	no	1,6,4,5,10,3,12,2,7,19,11,11,11	yes	1.7e-42	NA	NA	NA	NA	NA	NA	NA	NA	NA	NA	NA	NA
Hordeum vulgare	HORVU2Hr1G000770.12	CNL	partial	HORVU2Hr1G000770.12:278	HORVU2Hr1G000770.12:1151	QYCDKGLTVLPVVGPGGMGKTTLIQHIYHNQQVQNHFPVRIWICVSFNFNLDKVLQEIKRYTLPVEGENGCSTTQELIEHRLKYKRFLLVLDDIWQFTDVDDWKKLLLILSKSQENGSMILVTTRFQEIAKKVRAIGNSIQLNGLEPEEFRKLFLVYVFDDGQCPGNKVHLLNKIMEKLKGSPLAAKTVGRLLRTDPSMSHWRRVLNSEEW	no	1,6,4,5,10,3,12,2,7,19,11,11,11	yes	1.7e-42	NA	NA	NA	NA	NA	NA	NA	NA	NA	NA	NA	NA
Hordeum vulgare	HORVU2Hr1G000770.13	CNL	partial	HORVU2Hr1G000770.13:278	HORVU2Hr1G000770.13:1151	QYCDKGLTVLPVVGPGGMGKTTLIQHIYHNQQVQNHFPVRIWICVSFNFNLDKVLQEIKRYTLPVEGENGCSTTQELIEHRLKYKRFLLVLDDIWQFTDVDDWKKLLLILSKSQENGSMILVTTRFQEIAKKVRAIGNSIQLNGLEPEEFRKLFLVYVFDDGQCPGNKVHLLNKIMEKLKGSPLAAKTVGRLLRTDPSMSHWRRVLNSEEW	no	1,6,4,5,10,3,12,2,7,19,11,11,11	yes	1.7e-42	NA	NA	NA	NA	NA	NA	NA	NA	NA	NA	NA	NA
Hordeum vulgare	HORVU2Hr1G000770.14	CNL	partial	HORVU2Hr1G000770.14:280	HORVU2Hr1G000770.14:1153	QYCDKGLTVLPVVGPGGMGKTTLIQHIYHNQQVQNHFPVRIWICVSFNFNLDKVLQEIKRYTLPVEGENGCSTTQELIEHRLKYKRFLLVLDDIWQFTDVDDWKKLLLILSKSQENGSMILVTTRFQEIAKKVRAIGNSIQLNGLEPEEFRKLFLVYVFDDGQCPGNKVHLLNKIMEKLKGSPLAAKTVGRLLRTDPSMSHWRRVLNSEEW	no	1,6,4,5,10,3,12,2,7,19,11,11,11	yes	1.7e-42	NA	NA	NA	NA	NA	NA	NA	NA	NA	NA	NA	NA
Hordeum vulgare	HORVU2Hr1G000770.15	CNL	partial	HORVU2Hr1G000770.15:280	HORVU2Hr1G000770.15:1153	QYCDKGLTVLPVVGPGGMGKTTLIQHIYHNQQVQNHFPVRIWICVSFNFNLDKVLQEIKRYTLPVEGENGCSTTQELIEHRLKYKRFLLVLDDIWQFTDVDDWKKLLLILSKSQENGSMILVTTRFQEIAKKVRAIGNSIQLNGLEPEEFRKLFLVYVFDDGQCPGNKVHLLNKIMEKLKGSPLAAKTVGRLLRTDPSMSHWRRVLNSEEW	no	1,6,4,5,10,3,12,2,7,19,11,11,11	yes	1.7e-42	NA	NA	NA	NA	NA	NA	NA	NA	NA	NA	NA	NA
Hordeum vulgare	HORVU2Hr1G000770.16	CNL	partial	HORVU2Hr1G000770.16:307	HORVU2Hr1G000770.16:1180	QYCDKGLTVLPVVGPGGMGKTTLIQHIYHNQQVQNHFPVRIWICVSFNFNLDKVLQEIKRYTLPVEGENGCSTTQELIEHRLKYKRFLLVLDDIWQFTDVDDWKKLLLILSKSQENGSMILVTTRFQEIAKKVRAIGNSIQLNGLEPEEFRKLFLVYVFDDGQCPGNKVHLLNKIMEKLKGSPLAAKTVGRLLRTDPSMSHWRRVLNSEEW	no	1,6,4,5,10,3,12,2,7,19,11,11,11	yes	1.8e-42	NA	NA	NA	NA	NA	NA	NA	NA	NA	NA	NA	NA
Hordeum vulgare	HORVU2Hr1G000770.17	CNL	partial	HORVU2Hr1G000770.17:278	HORVU2Hr1G000770.17:1151	QYCDKGLTVLPVVGPGGMGKTTLIQHIYHNQQVQNHFPVRIWICVSFNFNLDKVLQEIKRYTLPVEGENGCSTTQELIEHRLKYKRFLLVLDDIWQFTDVDDWKKLLLILSKSQENGSMILVTTRFQEIAKKVRAIGNSIQLNGLEPEEFRKLFLVYVFDDGQCPGNKVHLLNKIMEKLKGSPLAAKTVGRLLRTDPSMSHWRRVLNSEEW	no	1,6,4,5,10,3,12,2,7,19,11,11,11	yes	1.7e-42	NA	NA	NA	NA	NA	NA	NA	NA	NA	NA	NA	NA
Hordeum vulgare	HORVU2Hr1G000770.18	CNL	partial	HORVU2Hr1G000770.18:278	HORVU2Hr1G000770.18:1151	QYCDKGLTVLPVVGPGGMGKTTLIQHIYHNQQVQNHFPVRIWICVSFNFNLDKVLQEIKRYTLPVEGENGCSTTQELIEHRLKYKRFLLVLDDIWQFTDVDDWKKLLLILSKSQENGSMILVTTRFQEIAKKVRAIGNSIQLNGLEPEEFRKLFLVYVFDDGQCPGNKVHLLNKIMEKLKGSPLAAKTVGRLLRTDPSMSHWRRVLNSEEW	no	1,6,4,5,10,3,12,2,7,19,11,11,11	yes	1.7e-42	NA	NA	NA	NA	NA	NA	NA	NA	NA	NA	NA	NA
Hordeum vulgare	HORVU2Hr1G000770.19	CNL	partial	HORVU2Hr1G000770.19:278	HORVU2Hr1G000770.19:1151	QYCDKGLTVLPVVGPGGMGKTTLIQHIYHNQQVQNHFPVRIWICVSFNFNLDKVLQEIKRYTLPVEGENGCSTTQELIEHRLKYKRFLLVLDDIWQFTDVDDWKKLLLILSKSQENGSMILVTTRFQEIAKKVRAIGNSIQLNGLEPEEFRKLFLVYVFDDGQCPGNKVHLLNKIMEKLKGSPLAAKTVGRLLRTDPSMSHWRRVLNSEEW	no	1,6,4,5,10,3,12,2,7,19,11,11,11	yes	1.7e-42	NA	NA	NA	NA	NA	NA	NA	NA	NA	NA	NA	NA
Hordeum vulgare	HORVU2Hr1G000770.20	CNL	partial	HORVU2Hr1G000770.20:278	HORVU2Hr1G000770.20:1151	QYCDKGLTVLPVVGPGGMGKTTLIQHIYHNQQVQNHFPVRIWICVSFNFNLDKVLQEIKRYTLPVEGENGCSTTQELIEHRLKYKRFLLVLDDIWQFTDVDDWKKLLLILSKSQENGSMILVTTRFQEIAKKVRAIGNSIQLNGLEPEEFRKLFLVYVFDDGQCPGNKVHLLNKIMEKLKGSPLAAKTVGRLLRTDPSMSHWRRVLNSEEW	no	1,6,4,5,10,3,12,2,7,19,11,11,11	yes	1.7e-42	NA	NA	NA	NA	NA	NA	NA	NA	NA	NA	NA	NA
Hordeum vulgare	HORVU2Hr1G000770.21	CNL	partial	HORVU2Hr1G000770.21:278	HORVU2Hr1G000770.21:1151	QYCDKGLTVLPVVGPGGMGKTTLIQHIYHNQQVQNHFPVRIWICVSFNFNLDKVLQEIKRYTLPVEGENGCSTTQELIEHRLKYKRFLLVLDDIWQFTDVDDWKKLLLILSKSQENGSMILVTTRFQEIAKKVRAIGNSIQLNGLEPEEFRKLFLVYVFDDGQCPGNKVHLLNKIMEKLKGSPLAAKTVGRLLRTDPSMSHWRRVLNSEEW	no	1,6,4,5,10,3,12,2,7,19,11,11,11	yes	1.7e-42	NA	NA	NA	NA	NA	NA	NA	NA	NA	NA	NA	NA
Hordeum vulgare	HORVU2Hr1G000770.22	CNL	partial	HORVU2Hr1G000770.22:278	HORVU2Hr1G000770.22:1151	QYCDKGLTVLPVVGPGGMGKTTLIQHIYHNQQVQNHFPVRIWICVSFNFNLDKVLQEIKRYTLPVEGENGCSTTQELIEHRLKYKRFLLVLDDIWQFTDVDDWKKLLLILSKSQENGSMILVTTRFQEIAKKVRAIGNSIQLNGLEPEEFRKLFLVYVFDDGQCPGNKVHLLNKIMEKLKGSPLAAKTVGRLLRTDPSMSHWRRVLNSEEW	no	1,6,4,5,10,3,12,2,7,19,11,11,11	yes	1.7e-42	NA	NA	NA	NA	NA	NA	NA	NA	NA	NA	NA	NA
Hordeum vulgare	HORVU2Hr1G000770.23	CNL	partial	HORVU2Hr1G000770.23:278	HORVU2Hr1G000770.23:1151	QYCDKGLTVLPVVGPGGMGKTTLIQHIYHNQQVQNHFPVRIWICVSFNFNLDKVLQEIKRYTLPVEGENGCSTTQELIEHRLKYKRFLLVLDDIWQFTDVDDWKKLLLILSKSQENGSMILVTTRFQEIAKKVRAIGNSIQLNGLEPEEFRKLFLVYVFDDGQCPGNKVHLLNKIMEKLKGSPLAAKTVGRLLRTDPSMSHWRRVLNSEEW	no	1,6,4,5,10,3,12,2,7,19,11,11,11	yes	1.7e-42	NA	NA	NA	NA	NA	NA	NA	NA	NA	NA	NA	NA
Hordeum vulgare	HORVU2Hr1G000770.24	CNL	partial	HORVU2Hr1G000770.24:278	HORVU2Hr1G000770.24:1151	QYCDKGLTVLPVVGPGGMGKTTLIQHIYHNQQVQNHFPVRIWICVSFNFNLDKVLQEIKRYTLPVEGENGCSTTQELIEHRLKYKRFLLVLDDIWQFTDVDDWKKLLLILSKSQENGSMILVTTRFQEIAKKVRAIGNSIQLNGLEPEEFRKLFLVYVFDDGQCPGNKVHLLNKIMEKLKGSPLAAKTVGRLLRTDPSMSHWRRVLNSEEW	no	1,6,4,5,10,3,12,2,7,19,11,11,11	yes	1.7e-42	NA	NA	NA	NA	NA	NA	NA	NA	NA	NA	NA	NA
Hordeum vulgare	HORVU2Hr1G000770.25	CNL	partial	HORVU2Hr1G000770.25:278	HORVU2Hr1G000770.25:1151	QYCDKGLTVLPVVGPGGMGKTTLIQHIYHNQQVQNHFPVRIWICVSFNFNLDKVLQEIKRYTLPVEGENGCSTTQELIEHRLKYKRFLLVLDDIWQFTDVDDWKKLLLILSKSQENGSMILVTTRFQEIAKKVRAIGNSIQLNGLEPEEFRKLFLVYVFDDGQCPGNKVHLLNKIMEKLKGSPLAAKTVGRLLRTDPSMSHWRRVLNSEEW	no	1,6,4,5,10,3,12,2,7,19,11,11,11	yes	1.7e-42	NA	NA	NA	NA	NA	NA	NA	NA	NA	NA	NA	NA
Hordeum vulgare	HORVU2Hr1G000770.26	CNL	partial	HORVU2Hr1G000770.26:287	HORVU2Hr1G000770.26:1160	QYCDKGLTVLPVVGPGGMGKTTLIQHIYHNQQVQNHFPVRIWICVSFNFNLDKVLQEIKRYTLPVEGENGCSTTQELIEHRLKYKRFLLVLDDIWQFTDVDDWKKLLLILSKSQENGSMILVTTRFQEIAKKVRAIGNSIQLNGLEPEEFRKLFLVYVFDDGQCPGNKVHLLNKIMEKLKGSPLAAKTVGRLLRTDPSMSHWRRVLNSEEW	no	1,6,4,5,10,3,12,2,7,19,11,11,11	yes	1.7e-42	NA	NA	NA	NA	NA	NA	NA	NA	NA	NA	NA	NA
Hordeum vulgare	HORVU2Hr1G000770.27	CNL	partial	HORVU2Hr1G000770.27:287	HORVU2Hr1G000770.27:1160	QYCDKGLTVLPVVGPGGMGKTTLIQHIYHNQQVQNHFPVRIWICVSFNFNLDKVLQEIKRYTLPVEGENGCSTTQELIEHRLKYKRFLLVLDDIWQFTDVDDWKKLLLILSKSQENGSMILVTTRFQEIAKKVRAIGNSIQLNGLEPEEFRKLFLVYVFDDGQCPGNKVHLLNKIMEKLKGSPLAAKTVGRLLRTDPSMSHWRRVLNSEEW	no	1,6,4,5,10,3,12,2,7,19,11,11,11	yes	1.7e-42	NA	NA	NA	NA	NA	NA	NA	NA	NA	NA	NA	NA
Hordeum vulgare	HORVU2Hr1G000770.28	CNL	partial	HORVU2Hr1G000770.28:300	HORVU2Hr1G000770.28:1173	QYCDKGLTVLPVVGPGGMGKTTLIQHIYHNQQVQNHFPVRIWICVSFNFNLDKVLQEIKRYTLPVEGENGCSTTQELIEHRLKYKRFLLVLDDIWQFTDVDDWKKLLLILSKSQENGSMILVTTRFQEIAKKVRAIGNSIQLNGLEPEEFRKLFLVYVFDDGQCPGNKVHLLNKIMEKLKGSPLAAKTVGRLLRTDPSMSHWRRVLNSEEW	no	1,6,4,5,10,3,12,2,7,19,11,11,11	yes	1.7e-42	NA	NA	NA	NA	NA	NA	NA	NA	NA	NA	NA	NA
Hordeum vulgare	HORVU2Hr1G000770.29	CNL	partial	HORVU2Hr1G000770.29:278	HORVU2Hr1G000770.29:1151	QYCDKGLTVLPVVGPGGMGKTTLIQHIYHNQQVQNHFPVRIWICVSFNFNLDKVLQEIKRYTLPVEGENGCSTTQELIEHRLKYKRFLLVLDDIWQFTDVDDWKKLLLILSKSQENGSMILVTTRFQEIAKKVRAIGNSIQLNGLEPEEFRKLFLVYVFDDGQCPGNKVHLLNKIMEKLKGSPLAAKTVGRLLRTDPSMSHWRRVLNSEEW	no	1,6,4,5,10,3,12,2,7,19,11,11,11	yes	1.7e-42	NA	NA	NA	NA	NA	NA	NA	NA	NA	NA	NA	NA
Hordeum vulgare	HORVU2Hr1G000770.30	CNL	partial	HORVU2Hr1G000770.30:278	HORVU2Hr1G000770.30:1151	QYCDKGLTVLPVVGPGGMGKTTLIQHIYHNQQVQNHFPVRIWICVSFNFNLDKVLQEIKRYTLPVEGENGCSTTQELIEHRLKYKRFLLVLDDIWQFTDVDDWKKLLLILSKSQENGSMILVTTRFQEIAKKVRAIGNSIQLNGLEPEEFRKLFLVYVFDDGQCPGNKVHLLNKIMEKLKGSPLAAKTVGRLLRTDPSMSHWRRVLNSEEW	no	1,6,4,5,10,3,12,2,7,19,11,11,11	yes	1.7e-42	NA	NA	NA	NA	NA	NA	NA	NA	NA	NA	NA	NA
Hordeum vulgare	HORVU2Hr1G000770.35	CNL	partial	HORVU2Hr1G000770.35:282	HORVU2Hr1G000770.35:1155	QYCDKGLTVLPVVGPGGMGKTTLIQHIYHNQQVQNHFPVRIWICVSFNFNLDKVLQEIKRYTLPVEGENGCSTTQELIEHRLKYKRFLLVLDDIWQFTDVDDWKKLLLILSKSQENGSMILVTTRFQEIAKKVRAIGNSIQLNGLEPEEFRKLFLVYVFDDGQCPGNKVHLLNKIMEKLKGSPLAAKTVGRLLRTDPSMSHWRRVLNSEEW	no	1,6,4,5,10,3,12,2,7,19,11,11,11	yes	1.7e-42	NA	NA	NA	NA	NA	NA	NA	NA	NA	NA	NA	NA
Hordeum vulgare	HORVU2Hr1G000770.5	CNL	partial	HORVU2Hr1G000770.5:282	HORVU2Hr1G000770.5:1008	QYCDKGLTVLPVVGPGGMGKTTLIQHIYHNQQVQNHFPVRIWICVSFNFNLDKVLQEIKRYTLPVEGENGCSTTQELIEHRLKYKRFLLVLDDIWQFTDVDDWKKLLLILSKSQENGSMILVTTRFQEIAKKVRAIGNSIQLNGLEPEEFRKLFLVYVFDDGQCPGNKVHLLNKIMEKLKGSPLAAKTVGRLLRTDPSMSHWRRVLNSEEW	no	1,6,4,5,10,3,12,2,7,19,11,11	yes	1.5e-42	NA	NA	NA	NA	NA	NA	NA	NA	NA	NA	NA	NA
Hordeum vulgare	HORVU2Hr1G000770.6	CNL	partial	HORVU2Hr1G000770.6:250	HORVU2Hr1G000770.6:982	QYCDMGLTVLPVIGPGGMGKTTLIQHIYNNQQVQNHFPVRIWICVSFSFNLGKVLEQIKEDTLTVEGENGCSTTQELIEHRLKHKRFLLVLDDIWQFTDVDDWKKLLLMLGKSQEKGSMILVTTRQKEIADQVKKTVEPKELNGLEPGEFKKLFLVYIFDAEQYPRDKLHLLNTGDEIMGKLKCSPLAAKTVGRLLSKDLSLLHWRRVLNS	no	1,6,4,5,10,3,12,2,8,7,11,19,11,11	yes	1.2e-38	NA	NA	NA	NA	NA	NA	NA	NA	NA	NA	NA	NA
Hordeum vulgare	HORVU2Hr1G000770.7	CNL	partial	HORVU2Hr1G000770.7:15	HORVU2Hr1G000770.7:736	QYCDMGLTVLPVIGPGGMGKTTLIQHIYNNQQVQNHFPVRIWICVSFSFNLGKVLEQIKEDTLTVEGENGCSTTQELIEHRLKHKRFLLVLDDIWQFTDVDDWKKLLLMLGKSQEKGSMILVTTRQKEIADQVKKTVEPKELNGLEPGEFKKLFLVYIFDAEQYPRDKLHLLNTGDEIMGKLKCSPLAAKTVGRLLSKDLSLLHWRRVLNS	no	17,1,6,4,5,10,3,12,2,8,7,11	yes	8.4e-39	NA	NA	NA	NA	NA	NA	NA	NA	NA	NA	NA	NA
Hordeum vulgare	HORVU2Hr1G000770.8	CNL	partial	HORVU2Hr1G000770.8:278	HORVU2Hr1G000770.8:1151	QYCDKGLTVLPVVGPGGMGKTTLIQHIYHNQQVQNHFPVRIWICVSFNFNLDKVLQEIKRYTLPVEGENGCSTTQELIEHRLKYKRFLLVLDDIWQFTDVDDWKKLLLILSKSQENGSMILVTTRFQEIAKKVRAIGNSIQLNGLEPEEFRKLFLVYVFDDGQCPGNKVHLLNKIMEKLKGSPLAAKTVGRLLRTDPSMSHWRRVLNSEEW	no	1,6,4,5,10,3,12,2,7,19,11,11,11	yes	1.7e-42	NA	NA	NA	NA	NA	NA	NA	NA	NA	NA	NA	NA
Hordeum vulgare	HORVU2Hr1G000770.9	CNL	partial	HORVU2Hr1G000770.9:278	HORVU2Hr1G000770.9:1151	QYCDKGLTVLPVVGPGGMGKTTLIQHIYHNQQVQNHFPVRIWICVSFNFNLDKVLQEIKRYTLPVEGENGCSTTQELIEHRLKYKRFLLVLDDIWQFTDVDDWKKLLLILSKSQENGSMILVTTRFQEIAKKVRAIGNSIQLNGLEPEEFRKLFLVYVFDDGQCPGNKVHLLNKIMEKLKGSPLAAKTVGRLLRTDPSMSHWRRVLNSEEW	no	1,6,4,5,10,3,12,2,7,19,11,11,11	yes	1.7e-42	NA	NA	NA	NA	NA	NA	NA	NA	NA	NA	NA	NA
Hordeum vulgare	HORVU2Hr1G000900.2	CNL	partial	HORVU2Hr1G000900.2:27	HORVU2Hr1G000900.2:1048	QYCDMGLTVLPVIGPGGMGKTTLIQHIYNNQQVQNHFPVRIWICVSFSFNLGKVLEQIKEDTLTVEGENGCSTTQELIEHRLKHKRFLLVLDDIWQFTDVDDWKKLLLMLGKSQEKGSMILVTTRQKEIADQVKKTVEPKELNGLEPGEFKKLFLVYIFDAEQYPRDKLHLLNTGDEIMGKLKCSPLAAKTVGRLLSKDLSLLHWRRVLNS	no	17,1,6,4,5,10,3,12,2,8,7,11,19,11,11	yes	1.4e-38	NA	NA	NA	NA	NA	NA	NA	NA	NA	NA	NA	NA
Hordeum vulgare	HORVU2Hr1G000900.3	CNL	partial	HORVU2Hr1G000900.3:17	HORVU2Hr1G000900.3:1161	QYCDMGLTVLPVIGPGGMGKTTLIQHIYNNQQVQNHFPVRIWICVSFSFNLGKVLEQIKEDTLTVEGENGCSTTQELIEHRLKHKRFLLVLDDIWQFTDVDDWKKLLLMLGKSQEKGSMILVTTRQKEIADQVKKTVEPKELNGLEPGEFKKLFLVYIFDAEQYPRDKLHLLNTGDEIMGKLKCSPLAAKTVGRLLSKDLSLLHWRRVLNS	no	17,1,6,4,5,10,3,12,2,8,7,11,19,11,11,11	yes	2.1e-38	NA	NA	NA	NA	NA	NA	NA	NA	NA	NA	NA	NA
Hordeum vulgare	HORVU2Hr1G002690.3	CNL	partial	HORVU2Hr1G002690.3:79	HORVU2Hr1G002690.3:474	GGDEEVFSVIALVGMGGLGKTALAKNIYRKERHKFQCHAWVSISQTYSREDVLRNIIEELFKNRVSFLSNTAAMDIISLEDVLRTFLEAHKYLIVLDDVWTPEAFDDLSRSLIGNKGSRLIITTREGYVAALASQGHILTLEALPKDEAWDLFCKKSFTRETNHECPEELKALSEEIVGKCKGLPLAIVSVGSLLSMHEKTVEKWRRINDQ	no	16,1,6,4,5,10,3,12,2,8	NA	2.5e-53	NA	NA	NA	NA	NA	NA	NA	NA	NA	NA	NA	NA
Hordeum vulgare	HORVU2Hr1G002690.4	CNL	partial	HORVU2Hr1G002690.4:79	HORVU2Hr1G002690.4:474	GGDEEVFSVIALVGMGGLGKTALAKNIYRKERHKFQCHAWVSISQTYSREDVLRNIIEELFKNRVSFLSNTAAMDIISLEDVLRTFLEAHKYLIVLDDVWTPEAFDDLSRSLIGNKGSRLIITTREGYVAALASQGHILTLEALPKDEAWDLFCKKSFTRETNHECPEELKALSEEIVGKCKGLPLAIVSVGSLLSMHEKTVEKWRRINDQ	no	16,1,6,4,5,10,3,12,2,8	NA	2.5e-53	NA	NA	NA	NA	NA	NA	NA	NA	NA	NA	NA	NA
Hordeum vulgare	HORVU2Hr1G003540.2	CNL	partial	HORVU2Hr1G003540.2:62	HORVU2Hr1G003540.2:453	NA	no	4,5,10,3,2,8,7,9	yes	6.8e-17	NA	NA	NA	NA	NA	NA	NA	NA	NA	NA	NA	NA
Hordeum vulgare	HORVU2Hr1G003540.3	CNL	partial	HORVU2Hr1G003540.3:155	HORVU2Hr1G003540.3:623	ADGDKQLKVVSIVGVGGIGKTTLAKQLWLEKKLGDFDCRAFVRTAKKPDMRRILRSILVQVRPHQPPNTSGVHDLIHDINEHLQNKRYFLIIDDLWATSVWDVVSDAFPEGNHCSRIVTTTEIEDVARACCSYPSKDIFKMEPLNVSNSKELFTNGVLGSREEDYRQFDEASDEIVRRCAGLPLAIISVASVLASQREADAVENREQTRGR	no	1,6,4,5,10,3,2,8,7,9	yes	5.1e-35	NA	NA	NA	NA	NA	NA	NA	NA	NA	NA	NA	NA
Hordeum vulgare	HORVU2Hr1G003540.7	CNL	partial	HORVU2Hr1G003540.7:33	HORVU2Hr1G003540.7:501	ADGDKQLKVVSIVGVGGIGKTTLAKQLWLEKKLGDFDCRAFVRTAKKPDMRRILRSILVQVRPHQPPNTSGVHDLIHDINEHLQNKRYFLIIDDLWATSVWDVVSDAFPEGNHCSRIVTTTEIEDVARACCSYPSKDIFKMEPLNVSNSKELFTNGVLGSREEDYRQFDEASDEIVRRCAGLPLAIISVASVLASQREADAVENREQTRGR	no	1,6,4,5,10,3,2,8,7,9	yes	2.4e-35	0.052	NA	NA	NA	NA	NA	NA	NA	NA	NA	NA	NA
Hordeum vulgare	HORVU2Hr1G003540.8	CNL	partial	HORVU2Hr1G003540.8:155	HORVU2Hr1G003540.8:344	ADGDKQLKVVSIVGVGGIGKTTLAKQLWLEKKLGDFDCRAFVRTAKKPDMRRILRSILVQVRPHQPPNTSGVHDLIHDINEHLQNKRYFLIIDDLWATSVWDVVSDAFPEGNHCSRIVTTTEIEDVARACCSYPSKDIFKMEPLNVSNSKELFTNGVLGSREEDYRQFDEASDEIVRRCAGLPLAIISVASVLASQREADAVENREQTRGR	no	1,6,4,5,10,3	NA	5.6e-36	NA	NA	NA	NA	NA	NA	NA	NA	NA	NA	NA	NA
Hordeum vulgare	HORVU2Hr1G003540.9	CNL	partial	HORVU2Hr1G003540.9:33	HORVU2Hr1G003540.9:222	ADGDKQLKVVSIVGVGGIGKTTLAKQLWLEKKLGDFDCRAFVRTAKKPDMRRILRSILVQVRPHQPPNTSGVHDLIHDINEHLQNKRYFLIIDDLWATSVWDVVSDAFPEGNHCSRIVTTTEIEDVARACCSYPSKDIFKMEPLNVSNSKELFTNGVLGSREEDYRQFDEASDEIVRRCAGLPLAIISVASVLASQREADAVENREQTRGR	no	1,6,4,5,10,3	NA	2.4e-36	NA	NA	NA	NA	NA	NA	NA	NA	NA	NA	NA	NA
Hordeum vulgare	HORVU2Hr1G003600.1	CNL	partial	HORVU2Hr1G003600.1:12	HORVU2Hr1G003600.1:203	EVEGEKLMVISIVGFGGSGKTALTKAVYHCPQVRRKFLRRAWVVASKHKDDAKGLLTAILQQLLPSEAPAVLPTQQVPQLQQHIIHHLQARST	no	17,16,1	NA	1e-12	NA	NA	NA	NA	NA	NA	NA	NA	NA	NA	NA	NA
Hordeum vulgare	HORVU2Hr1G003600.2	CNL	complete	HORVU2Hr1G003600.2:12	HORVU2Hr1G003600.2:657	EVEGEKLMVISIVGFGGSGKTALTKAVYHCPQVRRKFLRRAWVVASKHKDDAKGLLTAILQQLLPSEAPAVLPTQQVPQLQQHIIHHLQARSTRCLIVIDDMEHQHWKAIEPIIYVETLSRILVTTTIHSVANKCSSVGGYIYNMRTLSKEDSKVLLKKKVSLLGGSSPDLEDGSAAIVDKCDGHPLALVSVANHLLGESELTGKFCKDTS	no	17,16,1,4,5,10,3,2,8,11,9	yes	1.5e-30	0.45	NA	NA	NA	160	407	407	no	no	yes	NA	NA
Hordeum vulgare	HORVU2Hr1G003600.3	CNL	complete	HORVU2Hr1G003600.3:12	HORVU2Hr1G003600.3:657	EVEGEKLMVISIVGFGGSGKTALTKAVYHCPQVRRKFLRRAWVVASKHKDDAKGLLTAILQQLLPSEAPAVLPTQQVPQLQQHIIHHLQARSTRCLIVIDDMEHQHWKAIEPIIYVETLSRILVTTTIHSVANKCSSVGGYIYNMRTLSKEDSKVLLKKKVSLLGGSSPDLEDGSAAIVDKCDGHPLALVSVANHLLGESELTGKFCKDTS	no	17,16,1,4,5,10,3,2,8,11,9	yes	1.5e-30	0.45	NA	NA	NA	160	407	407	no	no	NA	NA	NA
Hordeum vulgare	HORVU2Hr1G003600.4	CNL	partial	HORVU2Hr1G003600.4:12	HORVU2Hr1G003600.4:203	EVEGEKLMVISIVGFGGSGKTALTKAVYHCPQVRRKFLRRAWVVASKHKDDAKGLLTAILQQLLPSEAPAVLPTQQVPQLQQHIIHHLQARSTRCRRLILHGRRRIKRSKRDQSSHNHHSNNQRSSCIRLLGCHWSLWVTRRPLHATWAIFRRAGAVESMARSAVVSEELPMTVRWSAGGRRRNRPVVEGERNGCGLGVVQGSLCFTAAAQ	no	17,16,1	NA	1.4e-12	NA	NA	NA	NA	NA	NA	NA	NA	NA	NA	NA	NA
Hordeum vulgare	HORVU2Hr1G003600.5	CNL	partial	HORVU2Hr1G003600.5:22	HORVU2Hr1G003600.5:413	NA	no	4,5,10,3,2,8,11,9	NA	2.1e-12	0.57	NA	NA	NA	NA	NA	NA	NA	NA	NA	NA	NA
Hordeum vulgare	HORVU2Hr1G003600.6	CNL	partial	HORVU2Hr1G003600.6:22	HORVU2Hr1G003600.6:413	NA	no	4,5,10,3,2,8,11,9	NA	2.1e-12	0.57	NA	NA	NA	NA	NA	NA	NA	NA	NA	NA	NA
Hordeum vulgare	HORVU2Hr1G004070.1	CNL	partial	HORVU2Hr1G004070.1:30	HORVU2Hr1G004070.1:271	DVSNKKLKIVSVVGFGGLGKTTLVKTVYDKIKGDFDCRAFVSVGQKADPKKVLMDILLDLGVRGSQLTLLDETQLVKKLLEYLEEKRYARIHFSP	no	17,16,14,1,6	NA	2.6e-15	NA	NA	NA	NA	NA	NA	NA	NA	NA	NA	NA	NA
Hordeum vulgare	HORVU2Hr1G004070.2	CNL	partial	HORVU2Hr1G004070.2:30	HORVU2Hr1G004070.2:271	DVSNKKLKIVSVVGFGGLGKTTLVKTVYDKIKGDFDCRAFVSVGQKADPKKVLMDILLDLGVRGSQLTLLDETQLVKKLLEYLEEKSF	no	17,16,14,1,6	NA	2.7e-14	NA	NA	NA	NA	NA	NA	NA	NA	NA	NA	NA	NA
Hordeum vulgare	HORVU2Hr1G004070.3	CNL	partial	HORVU2Hr1G004070.3:27	HORVU2Hr1G004070.3:501	DVSNKKLKIVSVVGFGGLGKTTLVKTVYDKIKGDFDCRAFVSVGQKADPKKVLMDILLDLGVRGSQLTLLDETQLVKKLLEYLEEKRYLIVIDDIWEAKLWKIINYAFSRGNNAGSRLITTTRIVDVSKLCCSTTNDSVYPMEPLSDYDSQRLFHKRIFSQENGCPREFEKVSRGILKKCGGVPLAIITIASVLASDQKVNSHHEWQVLLE	no	17,16,1,6,4,5,10,3,12,2,8,7	NA	3.6e-44	NA	NA	NA	NA	NA	NA	NA	NA	NA	NA	NA	NA
Hordeum vulgare	HORVU2Hr1G004070.4	CNL	partial	HORVU2Hr1G004070.4:25	HORVU2Hr1G004070.4:535	DVSNKKLKIVSVVGFGGLGKTTLVKTVYDKIKGDFDCRAFVSVGQKADPKKVLMDILLDLGVRGSQLTLLDETQLVKKLLEYLEEKRYLIVIDDIWEAKLWKIINYAFSRGNNAGSRLITTTRIVDVSKLCCSTTNDSVYPMEPLSDYDSQRLFHKRIFSQENGCPREFEKVSRGILKKCGGVPLAIITIASVLASDQKVNSHHEWQVLLE	no	17,16,14,1,6,4,5,10,3,12,2,8,7	NA	4.3e-44	NA	NA	NA	NA	NA	NA	NA	NA	NA	NA	NA	NA
Hordeum vulgare	HORVU2Hr1G004150.1	CNL	partial	HORVU2Hr1G004150.1:4	HORVU2Hr1G004150.1:191	NA	no	10,3,12,2,8,7	NA	4.9e-10	NA	NA	NA	NA	NA	NA	NA	NA	NA	NA	NA	NA
Hordeum vulgare	HORVU2Hr1G004150.2	CNL	partial	HORVU2Hr1G004150.2:12	HORVU2Hr1G004150.2:523	DMAKKNLKIISVVGFGGMGKTTLVKTVYEKIEGDYDCTAFVPVGRKAEAKTVFTNILLNLGMNGSELIMLNEKLLIDKLREFLKNKRYLIVIDDIWDEELWRVIKCAFSSSNNFGSRLITTTRIVSVCESCCSSTNDSIYIMEPLSDEDSERLFYKRIFSLESGCPPEFEEVSRDVLKKCGGVPLAIITIASLLASGKQVKPKNEWDALLE	no	17,16,14,1,6,4,5,10,3,12,2,8,7	NA	3e-46	NA	NA	NA	NA	NA	NA	NA	NA	NA	NA	NA	NA
Hordeum vulgare	HORVU2Hr1G004150.3	CNL	partial	HORVU2Hr1G004150.3:12	HORVU2Hr1G004150.3:523	DMAKKNLKIISVVGFGGMGKTTLVKTVYEKIEGDYDCTAFVPVGRKAEAKTVFTNILLNLGMNGSELIMLNEKLLIDKLREFLKNKRYLIVIDDIWDEELWRVIKCAFSSSNNFGSRLITTTRIVSVCESCCSSTNDSIYIMEPLSDEDSERLFYKRIFSLESGCPPEFEEVSRDVLKKCGGVPLAIITIASLLASGKQVKPKNEWDALLE	no	17,16,14,1,6,4,5,10,3,12,2,8,7	NA	3e-46	NA	NA	NA	NA	NA	NA	NA	NA	NA	NA	NA	NA
Hordeum vulgare	HORVU2Hr1G004150.4	CNL	partial	HORVU2Hr1G004150.4:23	HORVU2Hr1G004150.4:265	DMAKKNLKIISVVGFGGMGKTTLVKTVYEKIEGDYDCTAFVPVGRKAEAKTVFTNILLNLGMNGSELIMLNEKLLIDKLREFLKNKRGTL	no	17,16,14,1,6	NA	1.5e-14	NA	NA	NA	NA	NA	NA	NA	NA	NA	NA	NA	NA
Hordeum vulgare	HORVU2Hr1G004150.5	CNL	partial	HORVU2Hr1G004150.5:23	HORVU2Hr1G004150.5:265	DMAKKNLKIISVVGFGGMGKTTLVKTVYEKIEGDYDCTAFVPVGRKAEAKTVFTNILLNLGMNGSELIMLNEKLLIDKLREFLKNKRYLLSLT	no	17,16,14,1,6	NA	2.5e-16	NA	NA	NA	NA	NA	NA	NA	NA	NA	NA	NA	NA
Hordeum vulgare	HORVU2Hr1G006040.1	CNL	partial	HORVU2Hr1G006040.1:83	HORVU2Hr1G006040.1:547	YPVNGDVSVLAIVGIGGVGKTTLAQQICQDQHVKGYFDQILWTCVSDDFDTKRITKELVHSCGEDIASDNLDYLQNKLAKVVGLNRFLVVLDDVWDDSLKDNGQEWQKFCAPLTTGVQGSMILMTTRSSKVAKLVCTLSPFQLQGLEEDTFWEFFKACALDGKRSTMDIKLASIGRMIVPKLKGSPLAAKTLGRLLRMKIDTVHWSNILNS	no	16,1,6,4,5,3,12,2,8,7	NA	4.6e-43	NA	NA	NA	NA	NA	NA	NA	NA	NA	NA	NA	NA
Hordeum vulgare	HORVU2Hr1G006040.10	CNL	partial	HORVU2Hr1G006040.10:83	HORVU2Hr1G006040.10:547	YPVNGDVSVLAIVGIGGVGKTTLAQQICQDQHVKGYFDQILWTCVSDDFDTKRITKELVHSCGEDIASDNLDYLQNKLAKVVGLNRFLVVLDDVWDDSLKDNGQEWQKFCAPLTTGVQGSMILMTTRSSKVAKLVCTLSPFQLQGLEEDTFWEFFKACALDGKRSTMDIKLASIGRMIVPKLKGSPLAAKTLGRLLRMKIDTVHWSNILNS	no	16,1,6,4,5,3,12,2,8,7	NA	4.6e-43	NA	NA	NA	NA	NA	NA	NA	NA	NA	NA	NA	NA
Hordeum vulgare	HORVU2Hr1G006040.2	CNL	partial	HORVU2Hr1G006040.2:83	HORVU2Hr1G006040.2:547	YPVNGDVSVLAIVGIGGVGKTTLAQQICQDQHVKGYFDQILWTCVSDDFDTKRITKELVHSCGEDIASDNLDYLQNKLAKVVGLNRFLVVLDDVWDDSLKDNGQEWQKFCAPLTTGVQGSMILMTTRSSKVAKLVCTLSPFQLQGLEEDTFWEFFKACALDGKRSTMDIKLASIGRMIVPKLKGSPLAAKTLGRLLRMKIDTVHWSNILNS	no	16,1,6,4,5,3,12,2,8,7	NA	4.6e-43	NA	NA	NA	NA	NA	NA	NA	NA	NA	NA	NA	NA
Hordeum vulgare	HORVU2Hr1G006040.3	CNL	partial	HORVU2Hr1G006040.3:83	HORVU2Hr1G006040.3:547	YPVNGDVSVLAIVGIGGVGKTTLAQQICQDQHVKGYFDQILWTCVSDDFDTKRITKELVHSCGEDIASDNLDYLQNKLAKVVGLNRFLVVLDDVWDDSLKDNGQEWQKFCAPLTTGVQGSMILMTTRSSKVAKLVCTLSPFQLQGLEEDTFWEFFKACALDGKRSTMDIKLASIGRMIVPKLKGSPLAAKTLGRLLRMKIDTVHWSNILNS	no	16,1,6,4,5,3,12,2,8,7	NA	4.6e-43	NA	NA	NA	NA	NA	NA	NA	NA	NA	NA	NA	NA
Hordeum vulgare	HORVU2Hr1G006040.4	CNL	partial	HORVU2Hr1G006040.4:83	HORVU2Hr1G006040.4:547	YPVNGDVSVLAIVGIGGVGKTTLAQQICQDQHVKGYFDQILWTCVSDDFDTKRITKELVHSCGEDIASDNLDYLQNKLAKVVGLNRFLVVLDDVWDDSLKDNGQEWQKFCAPLTTGVQGSMILMTTRSSKVAKLVCTLSPFQLQGLEEDTFWEFFKACALDGKRSTMDIKLASIGRMIVPKLKGSPLAAKTLGRLLRMKIDTVHWSNILNS	no	16,1,6,4,5,3,12,2,8,7	NA	4.6e-43	NA	NA	NA	NA	NA	NA	NA	NA	NA	NA	NA	NA
Hordeum vulgare	HORVU2Hr1G006040.5	CNL	partial	HORVU2Hr1G006040.5:83	HORVU2Hr1G006040.5:547	YPVNGDVSVLAIVGIGGVGKTTLAQQICQDQHVKGYFDQILWTCVSDDFDTKRITKELVHSCGEDIASDNLDYLQNKLAKVVGLNRFLVVLDDVWDDSLKDNGQEWQKFCAPLTTGVQGSMILMTTRSSKVAKLVCTLSPFQLQGLEEDTFWEFFKACALDGKRSTMDIKLASIGRMIVPKLKGSPLAAKTLGRLLRMKIDTVHWSNILNS	no	16,1,6,4,5,3,12,2,8,7	NA	4.6e-43	NA	NA	NA	NA	NA	NA	NA	NA	NA	NA	NA	NA
Hordeum vulgare	HORVU2Hr1G006040.6	CNL	partial	HORVU2Hr1G006040.6:83	HORVU2Hr1G006040.6:547	YPVNGDVSVLAIVGIGGVGKTTLAQQICQDQHVKGYFDQILWTCVSDDFDTKRITKELVHSCGEDIASDNLDYLQNKLAKVVGLNRFLVVLDDVWDDSLKDNGQEWQKFCAPLTTGVQGSMILMTTRSSKVAKLVCTLSPFQLQGLEEDTFWEFFKACALDGKRSTMDIKLASIGRMIVPKLKGSPLAAKTLGRLLRMKIDTVHWSNILNS	no	16,1,6,4,5,3,12,2,8,7	NA	4.6e-43	NA	NA	NA	NA	NA	NA	NA	NA	NA	NA	NA	NA
Hordeum vulgare	HORVU2Hr1G006040.7	CNL	partial	HORVU2Hr1G006040.7:83	HORVU2Hr1G006040.7:547	YPVNGDVSVLAIVGIGGVGKTTLAQQICQDQHVKGYFDQILWTCVSDDFDTKRITKELVHSCGEDIASDNLDYLQNKLAKVVGLNRFLVVLDDVWDDSLKDNGQEWQKFCAPLTTGVQGSMILMTTRSSKVAKLVCTLSPFQLQGLEEDTFWEFFKACALDGKRSTMDIKLASIGRMIVPKLKGSPLAAKTLGRLLRMKIDTVHWSNILNS	no	16,1,6,4,5,3,12,2,8,7	NA	4.6e-43	NA	NA	NA	NA	NA	NA	NA	NA	NA	NA	NA	NA
Hordeum vulgare	HORVU2Hr1G006040.8	CNL	partial	HORVU2Hr1G006040.8:83	HORVU2Hr1G006040.8:547	YPVNGDVSVLAIVGIGGVGKTTLAQQICQDQHVKGYFDQILWTCVSDDFDTKRITKELVHSCGEDIASDNLDYLQNKLAKVVGLNRFLVVLDDVWDDSLKDNGQEWQKFCAPLTTGVQGSMILMTTRSSKVAKLVCTLSPFQLQGLEEDTFWEFFKACALDGKRSTMDIKLASIGRMIVPKLKGSPLAAKTLGRLLRMKIDTVHWSNILNS	no	16,1,6,4,5,3,12,2,8,7	NA	4.6e-43	NA	NA	NA	NA	NA	NA	NA	NA	NA	NA	NA	NA
Hordeum vulgare	HORVU2Hr1G006040.9	CNL	partial	HORVU2Hr1G006040.9:83	HORVU2Hr1G006040.9:547	YPVNGDVSVLAIVGIGGVGKTTLAQQICQDQHVKGYFDQILWTCVSDDFDTKRITKELVHSCGEDIASDNLDYLQNKLAKVVGLNRFLVVLDDVWDDSLKDNGQEWQKFCAPLTTGVQGSMILMTTRSSKVAKLVCTLSPFQLQGLEEDTFWEFFKACALDGKRSTMDIKLASIGRMIVPKLKGSPLAAKTLGRLLRMKIDTVHWSNILNS	no	16,1,6,4,5,3,12,2,8,7	NA	4.6e-43	NA	NA	NA	NA	NA	NA	NA	NA	NA	NA	NA	NA
Hordeum vulgare	HORVU2Hr1G006470.1	CNL	partial	HORVU2Hr1G006470.1:167	HORVU2Hr1G006470.1:919	NIMQEHITILPIFGLAGSGKTTLAQMVFNDNHSLQVYDFRVWVHVSPQFDFHAIGKSIISQVSARGQEETNHSSSDMEGMQNIMKRLHELLNGKKVLLVLDDLWEEDPIRLQLLKSMLTFLGDRMDVIVTTCNQAIARKICTIEPYRLNPLSDEACWEIIKKLIRFEGGEEELEKIGREIASKCSGVPSAAREYAAMLRSSRDAMTWKNKM	no	1,6,4,5,3,9,11,11,11,11,11	yes	2.6e-35	8.4e-11	NA	NA	NA	142	380	437	no	no	yes	NA	NA
Hordeum vulgare	HORVU2Hr1G006470.10	CNL	partial	HORVU2Hr1G006470.10:2	HORVU2Hr1G006470.10:373	NIMQEHITILPIFGLAGSGKTTLAQMVFNDNHSLQVYDFRVWVHVSPQFDFHAIGKSIISQVSARGQEETNHSSSDMEGMQNIMKRLHELLNGKKVLLVLDDLWEEDPIRLQLLKSMLTFLGDRMDVIVTTCNQAIARKICTIEPYRLNPLSDEACWEIIKKLIRFEGGEEELEKIGREIASKCSGVPSAAREYAAMLRSSRDAMTWKNKM	no	17,1,6,4,5,3	NA	6.2e-36	NA	NA	NA	NA	NA	NA	NA	NA	NA	NA	NA	NA
Hordeum vulgare	HORVU2Hr1G006470.11	CNL	partial	HORVU2Hr1G006470.11:66	HORVU2Hr1G006470.11:734	QVQETKILMMFVQGHSGSGKTTLAQMVFNDNHSLQVYDFRVWVHVSPQFDFHAIGKSIISQVSARGQEETNHSSSDMEGMQNIMKRLHELLNGKKVLLVLDDLWEEDPIRLQLLKSMLTFLGDRMDVIVTTCNQAIARKICTIEPYRLNPLSDEACWEIIKKLIRFEGGEEELEKIGREIASKCSGVPSAAREYAAMLRSSRDAMTWKNKM	no	1,6,4,5,3,11,11,11,11,11	yes	6.8e-36	6.1e-09	NA	NA	NA	71	282	421	no	no	yes	NA	NA
Hordeum vulgare	HORVU2Hr1G006470.12	CNL	partial	HORVU2Hr1G006470.12:8	HORVU2Hr1G006470.12:870	QVQETKILMMFVQGHSGSGKTTLAQMVFNDNHSLQVYDFRVWVHVSPQFDFHAIGKSIISQVSARGQEETNHSSSDMEGMQNIMKRLHELLNGKKVLLVLDDLWEEDPIRLQLLKSMLTFLGDRMDVIVTTCNQAIARKICTIEPYRLNPLSDEACWEIIKKLIRFEGGEEELEKIGREIASKCSGVPSAAREYAAMLRSSRDAMTWKNKM	no	17,1,6,4,5,3,9,11,11,11,11,11	yes	9.1e-36	1.1e-11	NA	NA	NA	123	350	437	no	no	yes	NA	NA
Hordeum vulgare	HORVU2Hr1G006470.14	NA	partial	HORVU2Hr1G006470.14:11	HORVU2Hr1G006470.14:654	NA	no	6,4,5,3,11,11,11,11,11	NA	6.3e-26	3.4e-09	NA	NA	NA	NA	NA	NA	NA	NA	NA	NA	NA
Hordeum vulgare	HORVU2Hr1G006470.3	CNL	partial	HORVU2Hr1G006470.3:8	HORVU2Hr1G006470.3:853	NIMQEHITILPIFGLAGSGKTTLAQMVFNDNHSLQVYDFRVWVHVSPQFDFHAIGKSIISQVSARGQEETNHSSSDMEGMQNIMKRLHELLNGKKVLLVLDDLWEEDPIRLQLLKSMLTFLGDRMDVIVTTCNQAIARKICTIEPYRLNPLSDEACWEIIKKLIRFEGGEEELEKIGREIASKCSGVPSAAREYAAMLRSSRDAMTWKNKM	no	17,1,6,4,5,3,11,11,11,11,11	yes	2.2e-35	2.9e-08	NA	NA	NA	160	312	421	no	no	yes	NA	NA
Hordeum vulgare	HORVU2Hr1G006470.4	CNL	partial	HORVU2Hr1G006470.4:8	HORVU2Hr1G006470.4:937	NIMQEHITILPIFGLAGSGKTTLAQMVFNDNHSLQVYDFRVWVHVSPQFDFHAIGKSIISQVSARGQEETNHSSSDMEGMQNIMKRLHELLNGKKVLLVLDDLWEEDPIRLQLLKSMLTFLGDRMDVIVTTCNQAIARKICTIEPYRLNPLSDEACWEIIKKLIRFEGGEEELEKIGREIASKCSGVPSAAREYAAMLRSSRDAMTWKNKM	no	17,1,6,4,5,3,9,11,11,11,11,11	yes	2.6e-35	9e-11	NA	NA	NA	160	380	437	no	no	NA	NA	NA
Hordeum vulgare	HORVU2Hr1G006470.5	CNL	partial	HORVU2Hr1G006470.5:117	HORVU2Hr1G006470.5:869	NIMQEHITILPIFGLAGSGKTTLAQMVFNDNHSLQVYDFRVWVHVSPQFDFHAIGKSIISQVSARGQEETNHSSSDMEGMQNIMKRLHELLNGKKVLLVLDDLWEEDPIRLQLLKSMLTFLGDRMDVIVTTCNQAIARKICTIEPYRLNPLSDEACWEIIKKLIRFEGGEEELEKIGREIASKCSGVPSAAREYAAMLRSSRDAMTWKNKM	no	1,6,4,5,3,9,11,11,11,11,11	yes	2.3e-35	3.8e-11	NA	NA	NA	92	380	437	no	no	NA	NA	NA
Hordeum vulgare	HORVU2Hr1G006470.6	CNL	partial	HORVU2Hr1G006470.6:8	HORVU2Hr1G006470.6:786	QVQETKILMMFVQGHSGSGKTTLAQMVFNDNHSLQVYDFRVWVHVSPQFDFHAIGKSIISQVSARGQEETNHSSSDMEGMQNIMKRLHELLNGKKVLLVLDDLWEEDPIRLQLLKSMLTFLGDRMDVIVTTCNQAIARKICTIEPYRLNPLSDEACWEIIKKLIRFEGGEEELEKIGREIASKCSGVPSAAREYAAMLRSSRDAMTWKNKM	no	17,1,6,4,5,3,11,11,11,11,11	yes	7.7e-36	8.6e-09	NA	NA	NA	123	282	421	no	no	NA	NA	NA
Hordeum vulgare	HORVU2Hr1G006470.7	CNL	partial	HORVU2Hr1G006470.7:8	HORVU2Hr1G006470.7:379	NIMQEHITILPIFGLAGSGKTTLAQMVFNDNHSLQVYDFRVWVHVSPQFDFHAIGKSIISQVSARGQEETNHSSSDMEGMQNIMKRLHELLNGKKVLLVLDDLWEEDPIRLQLLKSMLTFLGDRMDVIVTTCNQAIARKICTIEPYRLNPLSDEACWEIIKKLIRFEGGEEELEKIGREIASKCSGVPSAAREYAAMLRSSRDAMTWKNKM	no	17,1,6,4,5,3	NA	6.6e-36	NA	NA	NA	NA	NA	NA	NA	NA	NA	NA	NA	NA
Hordeum vulgare	HORVU2Hr1G006470.9	CNL	partial	HORVU2Hr1G006470.9:8	HORVU2Hr1G006470.9:312	QVQETKILMMFVQGHSGSGKTTLAQMVFNDNHSLQVYDFRVWVHVSPQFDFHAIGKSIISQVSARGQEETNHSSSDMEGMQNIMKRLHELLNGKKVLLVLDDLWEEDPIRLQLLKSMLTFLGDRMDVIVTTCNQAIARKICTIEPYRLNPLSDEACWEIIKKLIRFEGGEEELEKIGREIASKCSGVPSAAREYAAMLRSSRDAMTWKNKM	no	17,1,6,4,5,3	NA	2.4e-36	NA	NA	NA	NA	NA	NA	NA	NA	NA	NA	NA	NA
Hordeum vulgare	HORVU2Hr1G006480.1	CNL	partial	HORVU2Hr1G006480.1:14	HORVU2Hr1G006480.1:694	TNEKNNSGVLYVVGFGGVGKTTIATALYRKFGDQFDHRAMVNVSQSSDINAVLTNIKNQVMPQSSGQTQQGAGGVLGRLKQGTSAFAAKCCNAGASEETRGETKLDKLKEVLTDHFKDSSYLVLVDDVWSAATWEQIRKSLPTSSKRTRIIVTTRFQAVATRRRGEEGDHTRKVSPLGVEESERLFKQAFFESKGSEIDKVPKDVWKMCGG	no	17,16,1,6,4,5,10,3,12,2,8,7,9,9	yes	2e-37	NA	NA	NA	NA	188	414	379	no	no	NA	NA	NA
Hordeum vulgare	HORVU2Hr1G006480.10	CNL	partial	HORVU2Hr1G006480.10:14	HORVU2Hr1G006480.10:466	TNEKNNSGVLYVVGFGGVGKTTIATALYRKFGDQFDHRAMVNVSQSSDINAVLTNIKNQVMPQSSGQTQQGAGGVLGRLKQGTSAFAAKCCNAGASEETRGETKLDKLKEVLTDHFKDSSYLVLVDDVWSAATWEQIRKSLPTSSKRTRIIVTTRFQAVATRRRGEEGDHTRKVSPLGVEESERLFKQAFFESKGSEIDKVPKDVCKSLFP	no	1,6,4,5,10,12,2,8,7,9,9	yes	1.7e-26	0.77	NA	NA	NA	NA	NA	NA	NA	NA	NA	NA	NA
Hordeum vulgare	HORVU2Hr1G006480.11	CNL	partial	HORVU2Hr1G006480.11:2	HORVU2Hr1G006480.11:288	NA	no	3,12,2,8,7,9,9	NA	0.034	0.21	NA	NA	NA	NA	NA	NA	NA	NA	NA	NA	NA
Hordeum vulgare	HORVU2Hr1G006480.2	CNL	partial	HORVU2Hr1G006480.2:14	HORVU2Hr1G006480.2:694	TNEKNNSGVLYVVGFGGVGKTTIATALYRKFGDQFDHRAMVNVSQSSDINAVLTNIKNQVMPQSSGQTQQGAGGVLGRLKQGTSAFAAKCCNAGASEETRGETKLDKLKEVLTDHFKDSSYLVLVDDVWSAATWEQIRKSLPTSSKRTRIIVTTRFQAVATRRRGEEGDHTRKVSPLGVEESERLFKQAFFESKGSEIDKVPKDVWKMCGG	no	17,16,1,6,4,5,10,3,12,2,8,7,9,9	yes	2e-37	NA	NA	NA	NA	188	414	379	no	no	NA	NA	NA
Hordeum vulgare	HORVU2Hr1G006480.3	CNL	partial	HORVU2Hr1G006480.3:14	HORVU2Hr1G006480.3:262	TNEKNNSGVLYVVGFGGVGKTTIATALYRKFGDQFDHRAMVNVSQSSDINAVLTNIKNQVMPQSSGQTQQGAGGVLGRLKQGTSAFAAKCCNAGASEETRGETKLDKLKEVLTDHFKDSRY	no	17,16,1,6	NA	1.2e-12	NA	NA	NA	NA	NA	NA	NA	NA	NA	NA	NA	NA
Hordeum vulgare	HORVU2Hr1G006480.4	CNL	partial	HORVU2Hr1G006480.4:14	HORVU2Hr1G006480.4:694	TNEKNNSGVLYVVGFGGVGKTTIATALYRKFGDQFDHRAMVNVSQSSDINAVLTNIKNQVMPQSSGQTQQGAGGVLGRLKQGTSAFAAKCCNAGASEETRGETKLDKLKEVLTDHFKDSSYLVLVDDVWSAATWEQIRKSLPTSSKRTRIIVTTRFQAVATRRRGEEGDHTRKVSPLGVEESERLFKQAFFESKGSEIDKVPKDVWKMCGG	no	17,16,1,6,4,5,10,3,12,2,8,7,9,9	yes	2e-37	NA	NA	NA	NA	188	414	379	no	no	NA	NA	NA
Hordeum vulgare	HORVU2Hr1G006480.5	CNL	partial	HORVU2Hr1G006480.5:66	HORVU2Hr1G006480.5:746	TNEKNNSGVLYVVGFGGVGKTTIATALYRKFGDQFDHRAMVNVSQSSDINAVLTNIKNQVMPQSSGQTQQGAGGVLGRLKQGTSAFAAKCCNAGASEETRGETKLDKLKEVLTDHFKDSSYLVLVDDVWSAATWEQIRKSLPTSSKRTRIIVTTRFQAVATRRRGEEGDHTRKVSPLGVEESERLFKQAFFESKGSEIDKVPKDVWKMCGG	no	17,16,1,6,4,5,10,3,12,2,8,7,9,9	yes	2.4e-37	NA	NA	NA	NA	240	414	379	no	no	yes	NA	NA
Hordeum vulgare	HORVU2Hr1G006480.6	CNL	partial	HORVU2Hr1G006480.6:81	HORVU2Hr1G006480.6:761	TNEKNNSGVLYVVGFGGVGKTTIATALYRKFGDQFDHRAMVNVSQSSDINAVLTNIKNQVMPQSSGQTQQGAGGVLGRLKQGTSAFAAKCCNAGASEETRGETKLDKLKEVLTDHFKDSSYLVLVDDVWSAATWEQIRKSLPTSSKRTRIIVTTRFQAVATRRRGEEGDHTRKVSPLGVEESERLFKQAFFESKGSEIDKVPKDVWKMCGG	no	17,16,1,6,4,5,10,3,12,2,8,7,9,9	yes	2.5e-37	0.42	NA	NA	NA	255	414	379	no	no	NA	NA	NA
Hordeum vulgare	HORVU2Hr1G006480.7	CNL	partial	HORVU2Hr1G006480.7:76	HORVU2Hr1G006480.7:756	TNEKNNSGVLYVVGFGGVGKTTIATALYRKFGDQFDHRAMVNVSQSSDINAVLTNIKNQVMPQSSGQTQQGAGGVLGRLKQGTSAFAAKCCNAGASEETRGETKLDKLKEVLTDHFKDSSYLVLVDDVWSAATWEQIRKSLPTSSKRTRIIVTTRFQAVATRRRGEEGDHTRKVSPLGVEESERLFKQAFFESKGSEIDKVPKDVWKMCGG	no	17,16,1,6,4,5,10,3,12,2,8,7,9,9	yes	2.4e-37	NA	NA	NA	NA	250	414	379	no	no	NA	NA	NA
Hordeum vulgare	HORVU2Hr1G006480.8	CNL	partial	HORVU2Hr1G006480.8:14	HORVU2Hr1G006480.8:694	TNEKNNSGVLYVVGFGGVGKTTIATALYRKFGDQFDHRAMVNVSQSSDINAVLTNIKNQVMPQSSGQTQQGAGGVLGRLKQGTSAFAAKCCNAGASEETRGETKLDKLKEVLTDHFKDSSYLVLVDDVWSAATWEQIRKSLPTSSKRTRIIVTTRFQAVATRRRGEEGDHTRKVSPLGVEESERLFKQAFFESKGSEIDKVPKDVWKMCGG	no	17,16,1,6,4,5,10,3,12,2,8,7,9,9	yes	2e-37	NA	NA	NA	NA	188	414	379	no	no	NA	NA	NA
Hordeum vulgare	HORVU2Hr1G006480.9	CNL	partial	HORVU2Hr1G006480.9:14	HORVU2Hr1G006480.9:694	TNEKNNSGVLYVVGFGGVGKTTIATALYRKFGDQFDHRAMVNVSQSSDINAVLTNIKNQVMPQSSGQTQQGAGGVLGRLKQGTSAFAAKCCNAGASEETRGETKLDKLKEVLTDHFKDSSYLVLVDDVWSAATWEQIRKSLPTSSKRTRIIVTTRFQAVATRRRGEEGDHTRKVSPLGVEESERLFKQAFFESKGSEIDKVPKDVWKMCGG	no	17,16,1,6,4,5,10,3,12,2,8,7,9,9	yes	2e-37	NA	NA	NA	NA	188	414	379	no	no	NA	NA	NA
Hordeum vulgare	HORVU2Hr1G006490.1	NA	partial	HORVU2Hr1G006490.1:23	HORVU2Hr1G006490.1:331	NA	no	7,9,11,11,11,11,11	NA	NA	7.2e-14	NA	1.6e-06	NA	NA	NA	NA	NA	NA	NA	NA	NA
Hordeum vulgare	HORVU2Hr1G006590.1	CNL	partial	HORVU2Hr1G006590.1:96	HORVU2Hr1G006590.1:764	NIMQEHITILPIFGLVGSGKTTLAQMVFNDTHSLQGYDFRVWVHVSPQFDFHAIGKSIISQVSARGQEETNHSSSDMEGMQSIMKRLHELLNGKKVLLVLDDLWEEDPIRLQLLKSMLTFLGDRMDVIVTTCNQAIARKICTIEPYRLNPLSDEACWEIIKKLIRFEGGEEELEKIGREIASKCWGVPSAARAYAGILGSSRDAMTWKNKM	no	1,6,4,5,3,11,11,11,11,11,11,11	yes	7e-34	1e-08	NA	0.0033	NA	71	312	421	no	no	yes	NA	NA
Hordeum vulgare	HORVU2Hr1G006590.2	CNL	partial	HORVU2Hr1G006590.2:96	HORVU2Hr1G006590.2:848	NIMQEHITILPIFGLVGSGKTTLAQMVFNDTHSLQGYDFRVWVHVSPQFDFHAIGKSIISQVSARGQEETNHSSSDMEGMQSIMKRLHELLNGKKVLLVLDDLWEEDPIRLQLLKSMLTFLGDRMDVIVTTCNQAIARKICTIEPYRLNPLSDEACWEIIKKLIRFEGGEEELEKIGREIASKCWGVPSAARAYAGILGSSRDAMTWKNKM	no	1,6,4,5,3,7,9,11,11,11,11,11,11,11	yes	8.3e-34	3.7e-11	NA	0.12	NA	71	380	437	no	no	yes	NA	NA
Hordeum vulgare	HORVU2Hr1G006590.3	CNL	partial	HORVU2Hr1G006590.3:8	HORVU2Hr1G006590.3:937	NIMQEHITILPIFGLVGSGKTTLAQMVFNDTHSLQGYDFRVWVHVSPQFDFHAIGKSIISQVSARGQEETNHSSSDMEGMQSIMKRLHELLNGKKVLLVLDDLWEEDPIRLQLLKSMLTFLGDRMDVIVTTCNQAIARKICTIEPYRLNPLSDEACWEIIKKLIRFEGGEEELEKIGREIASKCWGVPSAARAYAGILGSSRDAMTWKNKM	no	17,1,6,4,5,3,7,9,11,11,11,11,11,11,11	yes	9.8e-34	8.8e-11	NA	0.34	NA	160	380	437	no	no	yes	NA	NA
Hordeum vulgare	HORVU2Hr1G006590.5	CNL	partial	HORVU2Hr1G006590.5:8	HORVU2Hr1G006590.5:379	NIMQEHITILPIFGLVGSGKTTLAQMVFNDTHSLQGYDFRVWVHVSPQFDFHAIGKSIISQVSARGQEETNHSSSDMEGMQSIMKRLHELLNGKKVLLVLDDLWEEDPIRLQLLKSMLTFLGDRMDVIVTTCNQAIARKICTIEPYRLNPLSDEACWEIIKKLIRFEGGEEELEKIGREIASKCWGVPSAARAYAGILGSSRDAMTWKNKM	no	17,1,6,4,5,3	NA	2.7e-34	NA	NA	NA	NA	NA	NA	NA	NA	NA	NA	NA	NA
Hordeum vulgare	HORVU2Hr1G006590.6	CNL	partial	HORVU2Hr1G006590.6:8	HORVU2Hr1G006590.6:379	NIMQEHITILPIFGLVGSGKTTLAQMVFNDTHSLQGYDFRVWVHVSPQFDFHAIGKSIISQVSARGQEETNHSSSDMEGMQSIMKRLHELLNGKKVLLVLDDLWEEDPIRLQLLKSMLTFLGDRMDVIVTTCNQAIARKICTIEPYRLNPLSDEACWEIIKKLIRFEGGEEELEKIGREIASKCWGVPSAARAYAGILGSSRDAMTWKNKM	no	17,1,6,4,5,3	NA	2.8e-34	NA	NA	NA	NA	NA	NA	NA	NA	NA	NA	NA	NA
Hordeum vulgare	HORVU2Hr1G006620.1	NA	partial	HORVU2Hr1G006620.1:34	HORVU2Hr1G006620.1:952	LEDASKGNMIYFKGWGGFGASALLNLVAQRLKSLATLNKFAKVIHVDCSVWKNMRALQKAVGEELELPQSVMAIFERCDQEDDFNGIEEGSRGVIAEISREICRKLLSSKFVLIFHNGSRSYIDLYECGVPVISLLGNKVLWTWHVRFRYCAYLILEDGEKGKMKSQSDILLSASPNNVELPELLDLVRDLLHEDALEVAKCAGIVQPDDM	no	1,7,9,11,11,11	yes	NA	NA	NA	NA	NA	NA	NA	NA	NA	NA	NA	NA	NA
Hordeum vulgare	HORVU2Hr1G006620.2	NA	partial	HORVU2Hr1G006620.2:34	HORVU2Hr1G006620.2:952	LEDASKGNMIYFKGWGGFGASALLNLVAQRLKSLATLNKFAKVIHVDCSVWKNMRALQKAVGEELELPQSVMAIFERCDQEDDFNGIEEGSRGVIAEISREICRKLLSSKFVLIFHNGSRSYIDLYECGVPVISLLGNKVLWTWHVRFRYCAYLILEDGEKGKMKSQSDILLSASPNNVELPELLDLVRDLLHEDALEVAKCAGIVQPDDM	no	1,7,9,11,11,11	yes	NA	NA	NA	NA	NA	NA	NA	NA	NA	NA	NA	NA	NA
Hordeum vulgare	HORVU2Hr1G006620.3	NA	partial	HORVU2Hr1G006620.3:34	HORVU2Hr1G006620.3:952	LEDASKGNMIYFKGWGGFGASALLNLVAQRLKSLATLNKFAKVIHVDCSVWKNMRALQKAVGEELELPQSVMAIFERCDQEDDFNGIEEGSRGVIAEISREICRKLLSSKFVLIFHNGSRSYIDLYECGVPVISLLGNKVLWTWHVRFRYCAYLILEDGEKGKMKSQSDILLSASPNNVELPELLDLVRDLLHEDALEVAKCAGIVQPDDM	no	1,7,9,11,11,11	yes	NA	NA	NA	NA	NA	NA	NA	NA	NA	NA	NA	NA	NA
Hordeum vulgare	HORVU2Hr1G006620.4	NA	partial	HORVU2Hr1G006620.4:34	HORVU2Hr1G006620.4:952	LEDASKGNMIYFKGWGGFGASALLNLVAQRLKSLATLNKFAKVIHVDCSVWKNMRALQKAVGEELELPQSVMAIFERCDQEDDFNGIEEGSRGVIAEISREICRKLLSSKFVLIFHNGSRSYIDLYECGVPVISLLGNKVLWTWHVRFRYCAYLILEDGEKGKMKSQSDILLSASPNNVELPELLDLVRDLLHEDALEVAKCAGIVQPDDM	no	1,7,9,11,11,11	yes	NA	NA	NA	NA	NA	NA	NA	NA	NA	NA	NA	NA	NA
Hordeum vulgare	HORVU2Hr1G006620.5	NA	partial	HORVU2Hr1G006620.5:30	HORVU2Hr1G006620.5:948	LEDASKGNMIYFKGWGGFGASALLNLVAQRLKSLATLNKFAKVIHVDCSVWKNMRALQKAVGEELELPQSVMAIFERCDQEDDFNGIEEGSRGVIAEISREICRKLLSSKFVLIFHNGSRSYIDLYECGVPVISLLGNKVLWTWHVRFRYCAYLILEDGEKGKMKSQSDILLSASPNNVELPELLDLVRDLLHEDALEVAKCAGIVQPDDM	no	1,7,9,11,11,11	yes	NA	NA	NA	NA	NA	NA	NA	NA	NA	NA	NA	NA	NA
Hordeum vulgare	HORVU2Hr1G006620.7	NA	partial	HORVU2Hr1G006620.7:34	HORVU2Hr1G006620.7:952	LEDASKGNMIYFKGWGGFGASALLNLVAQRLKSLATLNKFAKVIHVDCSVWKNMRALQKAVGEELELPQSVMAIFERCDQEDDFNGIEEGSRGVIAEISREICRKLLSSKFVLIFHNGSRSYIDLYECGVPVISLLGNKVLWTWHVRFRYCAYLILEDGEKGKMKSQSDILLSASPNNVELPELLDLVRDLLHEDALEVAKCAGIVQPDDM	no	1,7,9,11,11,11	yes	NA	NA	NA	NA	NA	NA	NA	NA	NA	NA	NA	NA	NA
Hordeum vulgare	HORVU2Hr1G007170.1	CNL	complete	HORVU2Hr1G007170.1:71	HORVU2Hr1G007170.1:866	LENCLNLQIIALWGMGGIGKSTLVSNVFRNEATNFECHAWVSVSQSYKLDDIWRRMLKEIYSKDKKEFDAEKMTCGELQDKLKELLKTKRYLIILDDVWTAEDFRKIKEVLVDAKLGSRIIITTRSEEVASIAPDDCRIKVEPLEDDDAWRLFCRKAFPCTENHICPLALQECGKLIVGRCDGLPLALVAIGSLLSLKAQNVTEWKLFDGQ	no	16,1,6,4,5,10,3,12,2,8,7,9,9,9,11,11	yes	3.7e-58	3.9e-06	NA	NA	NA	174	376	360	no	no	yes	NA	NA
Hordeum vulgare	HORVU2Hr1G007170.2	CNL	complete	HORVU2Hr1G007170.2:71	HORVU2Hr1G007170.2:866	LENCLNLQIIALWGMGGIGKSTLVSNVFRNEATNFECHAWVSVSQSYKLDDIWRRMLKEIYSKDKKEFDAEKMTCGELQDKLKELLKTKRYLIILDDVWTAEDFRKIKEVLVDAKLGSRIIITTRSEEVASIAPDDCRIKVEPLEDDDAWRLFCRKAFPCTENHICPLALQECGKLIVGRCDGLPLALVAIGSLLSLKAQNVTEWKLFDGQ	no	16,1,6,4,5,10,3,12,2,8,7,9,9,9,11,11	yes	3.7e-58	3.9e-06	NA	NA	NA	174	376	360	no	no	NA	NA	NA
Hordeum vulgare	HORVU2Hr1G007170.3	CNL	complete	HORVU2Hr1G007170.3:71	HORVU2Hr1G007170.3:866	LENCLNLQIIALWGMGGIGKSTLVSNVFRNEATNFECHAWVSVSQSYKLDDIWRRMLKEIYSKDKKEFDAEKMTCGELQDKLKELLKTKRYLIILDDVWTAEDFRKIKEVLVDAKLGSRIIITTRSEEVASIAPDDCRIKVEPLEDDDAWRLFCRKAFPCTENHICPLALQECGKLIVGRCDGLPLALVAIGSLLSLKAQNVTEWKLFDGQ	no	16,1,6,4,5,10,3,12,2,8,7,9,9,9,11,11	yes	3.7e-58	3.9e-06	NA	NA	NA	174	376	360	no	no	NA	NA	NA
Hordeum vulgare	HORVU2Hr1G007170.4	CNL	complete	HORVU2Hr1G007170.4:71	HORVU2Hr1G007170.4:866	LENCLNLQIIALWGMGGIGKSTLVSNVFRNEATNFECHAWVSVSQSYKLDDIWRRMLKEIYSKDKKEFDAEKMTCGELQDKLKELLKTKRYLIILDDVWTAEDFRKIKEVLVDAKLGSRIIITTRSEEVASIAPDDCRIKVEPLEDDDAWRLFCRKAFPCTENHICPLALQECGKLIVGRCDGLPLALVAIGSLLSLKAQNVTEWKLFDGQ	no	16,1,6,4,5,10,3,12,2,8,7,9,9,9,11,11	yes	3.7e-58	3.8e-06	NA	NA	NA	174	376	356	no	no	NA	NA	NA
Hordeum vulgare	HORVU2Hr1G007170.6	NA	partial	HORVU2Hr1G007170.6:7	HORVU2Hr1G007170.6:182	NA	no	8,7,9,9,9	NA	NA	1.4e-05	NA	NA	NA	NA	NA	NA	NA	NA	NA	NA	NA
Hordeum vulgare	HORVU2Hr1G007610.3	CNL	partial	HORVU2Hr1G007610.3:49	HORVU2Hr1G007610.3:507	NA	no	3,12,2,8,7,11,19,11	NA	3.9e-07	0.008	NA	NA	NA	NA	NA	NA	NA	NA	NA	NA	NA
Hordeum vulgare	HORVU2Hr1G007610.4	CNL	partial	HORVU2Hr1G007610.4:77	HORVU2Hr1G007610.4:870	EQSSQPYDVISVVGIGGVGKTALVQRLYNHHWSAICGRKLWQIEQKEDDIISVLRLSYEHLPDHLKQCFVYFALFPKKCHLRGDELIQMWRAHGFLNTQAPDEIAYRYINDLLQLSFIEKVPNQEDHYVVHDLLHDVAESVSNGEHFRIEDDFNVCIPRNVRHLYVNASNILCMSSEELKESKKNLRSLIISNAQEGFPCKRIASSNFNHI	no	16,1,12,2,8,7,11,19,11,11,11	yes	5.4e-05	0.01	NA	NA	NA	205	197	521	no	no	NA	NA	NA
Hordeum vulgare	HORVU2Hr1G007610.5	CNL	partial	HORVU2Hr1G007610.5:36	HORVU2Hr1G007610.5:131	EQSSQPYDVISVVGIGGVGKTALVQRLYNHRYVKHHFDLTVWLHVSDKFDVGRLTKEMAQSNLSIFADLNSISSLDQAQSILRDTLNGKRALIVLDDVWNVLRSQLENM	no	1,6,4	NA	1.8e-23	NA	NA	NA	NA	NA	NA	NA	NA	NA	NA	NA	NA
Hordeum vulgare	HORVU2Hr1G007610.6	CNL	partial	HORVU2Hr1G007610.6:49	HORVU2Hr1G007610.6:507	NA	no	3,12,2,8,7,11,19,11	NA	1.1e-07	0.008	NA	NA	NA	NA	NA	NA	NA	NA	NA	NA	NA
Hordeum vulgare	HORVU2Hr1G007800.1	NA	partial	HORVU2Hr1G007800.1:33	HORVU2Hr1G007800.1:444	NA	no	8,7,11,9,9,11	NA	NA	0.0029	NA	NA	NA	NA	NA	NA	NA	NA	NA	NA	NA
Hordeum vulgare	HORVU2Hr1G007800.2	CNL	partial	HORVU2Hr1G007800.2:15	HORVU2Hr1G007800.2:443	EGGAQSRRVVSIVGFGGLGKTTLATAVYNSPELSAIQCRAFVPVSQTYDRRSLLKSVLKQLVVVPAQTPVNNHPLQGINNWGISRLLTEYITQLSNKRYLVVLDDVWMPAAWEDLNMFFPENGRKSRIIVTTRSQHVARNCSTSSNDHMYEMKPLNTEDSKLLFFKTLFGSGQCPWKLRKVSTDILEKCKGLPLVIVSIGRMLAQRKNKTP	no	17,16,1,6,4,5,10,3,12	NA	1.4e-44	NA	NA	NA	NA	NA	NA	NA	NA	NA	NA	NA	NA
Hordeum vulgare	HORVU2Hr1G007800.3	CNL	partial	HORVU2Hr1G007800.3:15	HORVU2Hr1G007800.3:443	EGGAQSRRVVSIVGFGGLGKTTLATAVYNSPELSAIQCRAFVPVSQTYDRRSLLKSVLKQLVVVPAQTPVNNHPLQGINNWGISRLLTEYITQLSNKRYLVVLDDVWMPAAWEDLNMFFPENGRKSRIIVTTRSQHVARNCSTSSNDHMYEMKPLNTEDSKLLFFKTLFGSGQCPWKLRKVSTDILEKCKGLPLVIVSIGRMLAQRKNKTP	no	17,16,1,6,4,5,10,3,12	NA	1.4e-44	NA	NA	NA	NA	NA	NA	NA	NA	NA	NA	NA	NA
Hordeum vulgare	HORVU2Hr1G010920.1	CNL	partial	HORVU2Hr1G010920.1:79	HORVU2Hr1G010920.1:647	GDHVKDCSVVVLSGMGGLGKTALAANVYKGERKNYDCHAWISVSQTYSQKDLLRKLFMDLLHGEAIAPVDIDTMDIPGIQDELRKFLAQKYLIVLDDVWKQESFSDLLGAFAPYTKGSSIVITTRSADVARLASEGRELKIECLPDDKAQELFHRKAFRREEDYKCPTELKYHSEQIVAKCKGLPLAIVSVGSLLFVREKNPTEWKRIHDQ	no	16,1,6,4,5,10,3,12,2,8,7,9,9	NA	1.5e-46	0.0005	NA	NA	NA	NA	NA	NA	NA	NA	NA	NA	NA
Hordeum vulgare	HORVU2Hr1G011300.1	CNL	complete	HORVU2Hr1G011300.1:11	HORVU2Hr1G011300.1:663	EVSMKQLKVVSIVGLGGLGKTTLANSVYEMLKVQFNIQQQKLQLDCTPFSPKRKGCMAFVSVSLNPTMEKIFKSLLHQFDKHAYQNINEASWGEAQLIGEIRTFLGDKRYLIVIDDIWDKSVWENIKYALPGNEHGSRVIVTTRILDVAQQAGGVYLLKPLSVADSRKLFYQRIYETENKSPPNHLFEVSEKILDRCGGVPLAIITIGSLL	no	17,16,14,1,6,4,5,10,3,12,2,8,7,11,9,11	yes	1.3e-41	0.0014	NA	NA	NA	175	398	354	no	no	NA	NA	NA
Hordeum vulgare	HORVU2Hr1G011300.10	CNL	complete	HORVU2Hr1G011300.10:11	HORVU2Hr1G011300.10:663	EVSMKQLKVVSIVGLGGLGKTTLANSVYEMLKVQFNIQQQKLQLDCTPFSPKRKGCMAFVSVSLNPTMEKIFKSLLHQFDKHAYQNINEASWGEAQLIGEIRTFLGDKRYLIVIDDIWDKSVWENIKYALPGNEHGSRVIVTTRILDVAQQAGGVYLLKPLSVADSRKLFYQRIYETENKSPPNHLFEVSEKILDRCGGVPLAIITIGSLL	no	17,16,14,1,6,4,5,10,3,12,2,8,7,11,9,11	yes	1e-41	0.0013	NA	NA	NA	175	398	269	no	no	NA	NA	NA
Hordeum vulgare	HORVU2Hr1G011300.2	CNL	complete	HORVU2Hr1G011300.2:11	HORVU2Hr1G011300.2:663	EVSMKQLKVVSIVGLGGLGKTTLANSVYEMLKVQFNIQQQKLQLDCTPFSPKRKGCMAFVSVSLNPTMEKIFKSLLHQFDKHAYQNINEASWGEAQLIGEIRTFLGDKRYLIVIDDIWDKSVWENIKYALPGNEHGSRVIVTTRILDVAQQAGGVYLLKPLSVADSRKLFYQRIYETENKSPPNHLFEVSEKILDRCGGVPLAIITIGSLL	no	17,16,14,1,6,4,5,10,3,12,2,8,7,11,9,11	yes	1.3e-41	0.0014	NA	NA	NA	175	398	354	no	no	NA	NA	NA
Hordeum vulgare	HORVU2Hr1G011300.3	CNL	complete	HORVU2Hr1G011300.3:11	HORVU2Hr1G011300.3:663	EVSMKQLKVVSIVGLGGLGKTTLANSVYEMLKVQFNIQQQKLQLDCTPFSPKRKGCMAFVSVSLNPTMEKIFKSLLHQFDKHAYQNINEASWGEAQLIGEIRTFLGDKRYLIVIDDIWDKSVWENIKYALPGNEHGSRVIVTTRILDVAQQAGGVYLLKPLSVADSRKLFYQRIYETENKSPPNHLFEVSEKILDRCGGVPLAIITIGSLL	no	17,16,14,1,6,4,5,10,3,12,2,8,7,11,9,11	yes	1.3e-41	0.0014	NA	NA	NA	175	398	354	no	no	NA	NA	NA
Hordeum vulgare	HORVU2Hr1G011300.4	CNL	complete	HORVU2Hr1G011300.4:11	HORVU2Hr1G011300.4:663	EVSMKQLKVVSIVGLGGLGKTTLANSVYEMLKVQFNIQQQKLQLDCTPFSPKRKGCMAFVSVSLNPTMEKIFKSLLHQFDKHAYQNINEASWGEAQLIGEIRTFLGDKRYLIVIDDIWDKSVWENIKYALPGNEHGSRVIVTTRILDVAQQAGGVYLLKPLSVADSRKLFYQRIYETENKSPPNHLFEVSEKILDRCGGVPLAIITIGSLL	no	17,16,14,1,6,4,5,10,3,12,2,8,7,11,9,11	yes	1.3e-41	0.0014	NA	NA	NA	175	398	354	no	no	NA	NA	NA
Hordeum vulgare	HORVU2Hr1G011300.5	CNL	complete	HORVU2Hr1G011300.5:11	HORVU2Hr1G011300.5:663	EVSMKQLKVVSIVGLGGLGKTTLANSVYEMLKVQFNIQQQKLQLDCTPFSPKRKGCMAFVSVSLNPTMEKIFKSLLHQFDKHAYQNINEASWGEAQLIGEIRTFLGDKRYLIVIDDIWDKSVWENIKYALPGNEHGSRVIVTTRILDVAQQAGGVYLLKPLSVADSRKLFYQRIYETENKSPPNHLFEVSEKILDRCGGVPLAIITIGSLL	no	17,16,14,1,6,4,5,10,3,12,2,8,7,11,9,11	yes	1.3e-41	0.0014	NA	NA	NA	175	398	354	no	no	NA	NA	NA
Hordeum vulgare	HORVU2Hr1G011300.6	CNL	complete	HORVU2Hr1G011300.6:11	HORVU2Hr1G011300.6:663	EVSMKQLKVVSIVGLGGLGKTTLANSVYEMLKVQFNIQQQKLQLDCTPFSPKRKGCMAFVSVSLNPTMEKIFKSLLHQFDKHAYQNINEASWGEAQLIGEIRTFLGDKRYLIVIDDIWDKSVWENIKYALPGNEHGSRVIVTTRILDVAQQAGGVYLLKPLSVADSRKLFYQRIYETENKSPPNHLFEVSEKILDRCGGVPLAIITIGSLL	no	17,16,14,1,6,4,5,10,3,12,2,8,7,11,9,11	yes	1.3e-41	0.0014	NA	NA	NA	175	398	354	no	no	NA	NA	NA
Hordeum vulgare	HORVU2Hr1G011300.7	CNL	complete	HORVU2Hr1G011300.7:49	HORVU2Hr1G011300.7:640	EVSMKQLKVVSIVGLGGLGKTTLANSVYEMLKVQFNIQQQKLQLDCTPFSPKRKGCMAFVSVSLNPTMEKIFKSLLHQFDKHAYQNINEASWGEAQLIGEIRTFLGDKRRYLIVIDDIWDKSVWENIKYALPGNEHGSRVIVTTRILDVAQQAGGVYLLKPLSVADSRKLFYQRIYETENKSPPNHLFEVSEKILDRCGGVPLAIITIGSL	no	16,14,1,6,4,5,10,3,12,2,8,7,11,9,11	yes	5.6e-41	0.0013	NA	NA	NA	151	399	354	no	no	yes	NA	NA
Hordeum vulgare	HORVU2Hr1G011300.8	CNL	complete	HORVU2Hr1G011300.8:11	HORVU2Hr1G011300.8:663	EVSMKQLKVVSIVGLGGLGKTTLANSVYEMLKVQFNIQQQKLQLDCTPFSPKRKGCMAFVSVSLNPTMEKIFKSLLHQFDKHAYQNINEASWGEAQLIGEIRTFLGDKRYLIVIDDIWDKSVWENIKYALPGNEHGSRVIVTTRILDVAQQAGGVYLLKPLSVADSRKLFYQRIYETENKSPPNHLFEVSEKILDRCGGVPLAIITIGSLL	no	17,16,14,1,6,4,5,10,3,12,2,8,7,11,9,11	yes	1.2e-41	0.0011	NA	NA	NA	175	398	343	no	no	yes	NA	NA
Hordeum vulgare	HORVU2Hr1G011300.9	CNL	complete	HORVU2Hr1G011300.9:11	HORVU2Hr1G011300.9:663	EVSMKQLKVVSIVGLGGLGKTTLANSVYEMLKVQFNIQQQKLQLDCTPFSPKRKGCMAFVSVSLNPTMEKIFKSLLHQFDKHAYQNINEASWGEAQLIGEIRTFLGDKRYLIVIDDIWDKSVWENIKYALPGNEHGSRVIVTTRILDVAQQAGGVYLLKPLSVADSRKLFYQRIYETENKSPPNHLFEVSEKILDRCGGVPLAIITIGSLL	no	17,16,14,1,6,4,5,10,3,12,2,8,7,11,9,11	yes	1.1e-41	0.0013	NA	NA	NA	175	398	298	no	no	NA	NA	NA
Hordeum vulgare	HORVU2Hr1G012010.1	CNL	complete	HORVU2Hr1G012010.1:11	HORVU2Hr1G012010.1:643	TAMDGQLKVVSIVGVGGLGKTTLANVVYQQIRGQFDCDAFVTVSLKPDLRRVLGSLLRQVSKQSYNEVEEWDVVELIDKIRQVLRDKRYLIIVDDIWDETAWNYIKTVLVENNCSSRVITTTRIAGVAASCCSSINGNIYKLNSLDHDDSKKLFYERIFGSEDVGHVELREISEEIIRKCDGVPLAIITIASLLSHKSKNIHEWDTVNKSI	no	17,16,14,1,6,4,5,10,3,12,2,8,7,11,9,9	yes	3.5e-47	0.00011	NA	0.19	NA	170	381	432	no	no	NA	NA	NA
Hordeum vulgare	HORVU2Hr1G012010.2	CNL	complete	HORVU2Hr1G012010.2:11	HORVU2Hr1G012010.2:643	TAMDGQLKVVSIVGVGGLGKTTLANVVYQQIRGQFDCDAFVTVSLKPDLRRVLGSLLRQVSKQSYNEVEEWDVVELIDKIRQVLRDKRYLIIVDDIWDETAWNYIKTVLVENNCSSRVITTTRIAGVAASCCSSINGNIYKLNSLDHDDSKKLFYERIFGSEDVGHVELREISEEIIRKCDGVPLAIITIASLLSHKSKNIHEWDTVNKSI	no	17,16,14,1,6,4,5,10,3,12,2,8,7,11,9,9	yes	4.2e-47	3.8e-08	NA	0.26	NA	170	381	531	no	no	NA	NA	NA
Hordeum vulgare	HORVU2Hr1G012010.3	CNL	complete	HORVU2Hr1G012010.3:11	HORVU2Hr1G012010.3:643	TAMDGQLKVVSIVGVGGLGKTTLANVVYQQIRGQFDCDAFVTVSLKPDLRRVLGSLLRQVSKQSYNEVEEWDVVELIDKIRQVLRDKRYLIIVDDIWDETAWNYIKTVLVENNCSSRVITTTRIAGVAASCCSSINGNIYKLNSLDHDDSKKLFYERIFGSEDVGHVELREISEEIIRKCDGVPLAIITIASLLSHKSKNIHEWDTVNKSI	no	17,16,14,1,6,4,5,10,3,12,2,8,7,11,9,9	yes	3.5e-47	0.00011	NA	0.19	NA	170	381	432	no	no	yes	NA	NA
Hordeum vulgare	HORVU2Hr1G012010.4	CNL	partial	HORVU2Hr1G012010.4:7	HORVU2Hr1G012010.4:246	TAMDGQLKVVSIVGVGGLGKTTLANVVYQQIRGQFDCDAFVTVSLKPDLRRVLGSLLRQVSKQSYNEVEEWDVVELIDKIRQVLRDK	no	17,16,14,1,6	NA	2.6e-13	NA	NA	NA	NA	NA	NA	NA	NA	NA	NA	NA	NA
Hordeum vulgare	HORVU2Hr1G012010.5	CNL	complete	HORVU2Hr1G012010.5:57	HORVU2Hr1G012010.5:628	TAMDGQLKVVSIVGVGGLGKTTLANVVYQQIRGQFDCDAFVTVSLKPDLRRVLGSLLRQVSKQSYNEVEEWDVVELIDKIRQVLRDKRYLIIVDDIWDETAWNYIKTVLVENNCSSRVITTTRIAGVAASCCSSINGNIYKLNSLDHDDSKKLFYERIFGSEDVGHVELREISEEIIRKCDGVPLAIITIASLLSHKSKNIHEWDTVNKSI	no	16,14,1,6,4,5,10,3,12,2,8,7,11,9,9	yes	2.7e-47	1.6e-08	NA	0.084	NA	155	381	302	no	no	NA	NA	NA
Hordeum vulgare	HORVU2Hr1G012010.6	CNL	partial	HORVU2Hr1G012010.6:1	HORVU2Hr1G012010.6:368	NA	no	4,5,10,3,12,2,8,7,11,9,9	NA	3.8e-26	7.4e-05	NA	0.62	NA	NA	NA	NA	NA	NA	NA	NA	NA
Hordeum vulgare	HORVU2Hr1G012400.1	NA	partial	HORVU2Hr1G012400.1:67	HORVU2Hr1G012400.1:111	NA	no	9,11	NA	NA	NA	NA	NA	NA	NA	NA	NA	NA	NA	NA	NA	NA
Hordeum vulgare	HORVU2Hr1G022620.10	CNL	partial	HORVU2Hr1G022620.10:8	HORVU2Hr1G022620.10:516	DKENNTLSAISIVAMGGAGKTSLVRKIYTSSRVKEHFDTAAWVTVSQKFKAVDLLTSIMEQIMGGRVGFNIRQCEVGKEIHDFLLQKRFLVVLDDVWETDTWEQINKMVKAFPDVANGSRVLLTTRKQDVANHVQMPTHVHHLKKLDEEKSWELFSSKALPPYNRSAVCDVDEFEELGKKLARKCNGLPLALAVFGGYLSKNLNKETWIDI	no	17,1,6,4,5,10,3,12,2,8,7	NA	1.2e-55	NA	NA	NA	NA	NA	NA	NA	NA	NA	NA	NA	NA
Hordeum vulgare	HORVU2Hr1G022620.12	CNL	partial	HORVU2Hr1G022620.12:8	HORVU2Hr1G022620.12:516	DKENNTLSAISIVAMGGAGKTSLVRKIYTSSRVKEHFDTAAWVTVSQKFKAVDLLTSIMEQIMGGRVGFNIRQCEVGKEIHDFLLQKRFLVVLDDVWETDTWEQINKMVKAFPDVANGSRVLLTTRKQDVANHVQMPTHVHHLKKLDEEKSWELFSSKALPPYNRSAVCDVDEFEELGKKLARKCNGLPLALAVFGGYLSKNLNKETWIDI	no	17,1,6,4,5,10,3,12,2,8,7	NA	1.2e-55	NA	NA	NA	NA	NA	NA	NA	NA	NA	NA	NA	NA
Hordeum vulgare	HORVU2Hr1G022620.13	CNL	partial	HORVU2Hr1G022620.13:8	HORVU2Hr1G022620.13:826	DKENNTLSAISIVAMGGAGKTSLVRKIYTSSRVKEHFDTAAWVTVSQKFKAVDLLTSIMEQIMGGRVGFNIRQCEVGKEIHDFLLQKRFLVVLDDVWETDTWEQINKMVKAFPDVANGSRVLLTTRKQDVANHVQMPTHVHHLKKLDEEKSWELFSSKALPPYNRSAVCDVDEFEELGKKLARKCNGLPLALAVFGGYLSKNLNKETWIDI	no	17,1,6,4,5,10,3,12,2,8,7,9,9,11	yes	2.8e-55	0.00015	NA	NA	NA	172	379	313	no	no	NA	NA	NA
Hordeum vulgare	HORVU2Hr1G022620.14	CNL	partial	HORVU2Hr1G022620.14:8	HORVU2Hr1G022620.14:826	DKENNTLSAISIVAMGGAGKTSLVRKIYTSSRVKEHFDTAAWVTVSQKFKAVDLLTSIMEQIMGGRVGFNIRQCEVGKEIHDFLLQKRFLVVLDDVWETDTWEQINKMVKAFPDVANGSRVLLTTRKQDVANHVQMPTHVHHLKKLDEEKSWELFSSKALPPYNRSAVCDVDEFEELGKKLARKCNGLPLALAVFGGYLSKNLNKETWIDI	no	17,1,6,4,5,10,3,12,2,8,7,9,9,11	yes	2.8e-55	0.00015	NA	NA	NA	172	379	313	no	no	NA	NA	NA
Hordeum vulgare	HORVU2Hr1G022620.15	CNL	partial	HORVU2Hr1G022620.15:8	HORVU2Hr1G022620.15:516	DKENNTLSAISIVAMGGAGKTSLVRKIYTSSRVKEHFDTAAWVTVSQKFKAVDLLTSIMEQIMGGRVGFNIRQCEVGKEIHDFLLQKRFLVVLDDVWETDTWEQINKMVKAFPDVANGSRVLLTTRKQDVANHVQMPTHVHHLKKLDEEKSWELFSSKALPPYNRSAVCDVDEFEELGKKLARKCNGLPLALAVFGGYLSKNLNKETWIDI	no	17,1,6,4,5,10,3,12,2,8,7	NA	1.2e-55	NA	NA	NA	NA	NA	NA	NA	NA	NA	NA	NA	NA
Hordeum vulgare	HORVU2Hr1G022620.16	CNL	partial	HORVU2Hr1G022620.16:8	HORVU2Hr1G022620.16:826	DKENNTLSAISIVAMGGAGKTSLVRKIYTSSRVKEHFDTAAWVTVSQKFKAVDLLTSIMEQIMGGRVGFNIRQCEVGKEIHDFLLQKRFLVVLDDVWETDTWEQINKMVKAFPDVANGSRVLLTTRKQDVANHVQMPTHVHHLKKLDEEKSWELFSSKALPPYNRSAVCDVDEFEELGKKLARKCNGLPLALAVFGGYLSKNLNKETWIDI	no	17,1,6,4,5,10,3,12,2,8,7,9,9,11	yes	2.8e-55	0.00017	NA	NA	NA	172	379	320	no	no	NA	NA	NA
Hordeum vulgare	HORVU2Hr1G022620.17	CNL	partial	HORVU2Hr1G022620.17:8	HORVU2Hr1G022620.17:516	DKENNTLSAISIVAMGGAGKTSLVRKIYTSSRVKEHFDTAAWVTVSQKFKAVDLLTSIMEQIMGGRVGFNIRQCEVGKEIHDFLLQKRFLVVLDDVWETDTWEQINKMVKAFPDVANGSRVLLTTRKQDVANHVQMPTHVHHLKKLDEEKSWELFSSKALPPYNRSAVCDVDEFEELGKKLARKCNGLPLALAVFGGYLSKNLNKETWIDI	no	17,1,6,4,5,10,3,12,2,8,7	NA	1.2e-55	NA	NA	NA	NA	NA	NA	NA	NA	NA	NA	NA	NA
Hordeum vulgare	HORVU2Hr1G022620.18	CNL	partial	HORVU2Hr1G022620.18:8	HORVU2Hr1G022620.18:826	DKENNTLSAISIVAMGGAGKTSLVRKIYTSSRVKEHFDTAAWVTVSQKFKAVDLLTSIMEQIMGGRVGFNIRQCEVGKEIHDFLLQKRFLVVLDDVWETDTWEQINKMVKAFPDVANGSRVLLTTRKQDVANHVQMPTHVHHLKKLDEEKSWELFSSKALPPYNRSAVCDVDEFEELGKKLARKCNGLPLALAVFGGYLSKNLNKETWIDI	no	17,1,6,4,5,10,3,12,2,8,7,9,9,11	yes	2.8e-55	0.00015	NA	NA	NA	172	379	313	no	no	NA	NA	NA
Hordeum vulgare	HORVU2Hr1G022620.19	CNL	partial	HORVU2Hr1G022620.19:8	HORVU2Hr1G022620.19:516	DKENNTLSAISIVAMGGAGKTSLVRKIYTSSRVKEHFDTAAWVTVSQKFKAVDLLTSIMEQIMGGRVGFNIRQCEVGKEIHDFLLQKRFLVVLDDVWETDTWEQINKMVKAFPDVANGSRVLLTTRKQDVANHVQMPTHVHHLKKLDEEKSWELFSSKALPPYNRSAVCDVDEFEELGKKLARKCNGLPLALAVFGGYLSKNLNKETWIDI	no	17,1,6,4,5,10,3,12,2,8,7	NA	1.2e-55	NA	NA	NA	NA	NA	NA	NA	NA	NA	NA	NA	NA
Hordeum vulgare	HORVU2Hr1G022620.2	CNL	partial	HORVU2Hr1G022620.2:11	HORVU2Hr1G022620.2:519	DKENNTLSAISIVAMGGAGKTSLVRKIYTSSRVKEHFDTAAWVTVSQKFKAVDLLTSIMEQIMGGRVGFNIRQCEVGKEIHDFLLQKRFLVVLDDVWETDTWEQINKMVKAFPDVANGSRVLLTTRKQDVANHVQMPTHVHHLKKLDEEKSWELFSSKALPPYNRSAVCDVDEFEELGKKLARKCNGLPLALAVFGGYLSKNLNKETWIDI	no	17,1,6,4,5,10,3,12,2,8,7	NA	1.2e-55	NA	NA	NA	NA	NA	NA	NA	NA	NA	NA	NA	NA
Hordeum vulgare	HORVU2Hr1G022620.20	CNL	partial	HORVU2Hr1G022620.20:8	HORVU2Hr1G022620.20:826	DKENNTLSAISIVAMGGAGKTSLVRKIYTSSRVKEHFDTAAWVTVSQKFKAVDLLTSIMEQIMGGRVGFNIRQCEVGKEIHDFLLQKRFLVVLDDVWETDTWEQINKMVKAFPDVANGSRVLLTTRKQDVANHVQMPTHVHHLKKLDEEKSWELFSSKALPPYNRSAVCDVDEFEELGKKLARKCNGLPLALAVFGGYLSKNLNKETWIDI	no	17,1,6,4,5,10,3,12,2,8,7,9,9,11	yes	2.8e-55	0.00015	NA	NA	NA	172	379	313	no	no	yes	NA	NA
Hordeum vulgare	HORVU2Hr1G022620.21	CNL	partial	HORVU2Hr1G022620.21:8	HORVU2Hr1G022620.21:826	DKENNTLSAISIVAMGGAGKTSLVRKIYTSSRVKEHFDTAAWVTVSQKFKAVDLLTSIMEQIMGGRVGFNIRQCEVGKEIHDFLLQKRFLVVLDDVWETDTWEQINKMVKAFPDVANGSRVLLTTRKQDVANHVQMPTHVHHLKKLDEEKSWELFSSKALPPYNRSAVCDVDEFEELGKKLARKCNGLPLALAVFGGYLSKNLNKETWIDI	no	17,1,6,4,5,10,3,12,2,8,7,9,9,11	yes	2.8e-55	0.00017	NA	NA	NA	172	379	320	no	no	NA	NA	NA
Hordeum vulgare	HORVU2Hr1G022620.22	CNL	partial	HORVU2Hr1G022620.22:8	HORVU2Hr1G022620.22:826	DKENNTLSAISIVAMGGAGKTSLVRKIYTSSRVKEHFDTAAWVTVSQKFKAVDLLTSIMEQIMGGRVGFNIRQCEVGKEIHDFLLQKRFLVVLDDVWETDTWEQINKMVKAFPDVANGSRVLLTTRKQDVANHVQMPTHVHHLKKLDEEKSWELFSSKALPPYNRSAVCDVDEFEELGKKLARKCNGLPLALAVFGGYLSKNLNKETWIDI	no	17,1,6,4,5,10,3,12,2,8,7,9,9,11	yes	2.8e-55	0.00015	NA	NA	NA	172	379	313	no	no	NA	NA	NA
Hordeum vulgare	HORVU2Hr1G022620.3	CNL	partial	HORVU2Hr1G022620.3:8	HORVU2Hr1G022620.3:516	DKENNTLSAISIVAMGGAGKTSLVRKIYTSSRVKEHFDTAAWVTVSQKFKAVDLLTSIMEQIMGGRVGFNIRQCEVGKEIHDFLLQKRFLVVLDDVWETDTWEQINKMVKAFPDVANGSRVLLTTRKQDVANHVQMPTHVHHLKKLDEEKSWELFSSKALPPYNRSAVCDVDEFEELGKKLARKCNGLPLALAVFGGYLSKNLNKETWIDI	no	17,1,6,4,5,10,3,12,2,8,7	NA	1.2e-55	NA	NA	NA	NA	NA	NA	NA	NA	NA	NA	NA	NA
Hordeum vulgare	HORVU2Hr1G022620.4	CNL	partial	HORVU2Hr1G022620.4:8	HORVU2Hr1G022620.4:516	DKENNTLSAISIVAMGGAGKTSLVRKIYTSSRVKEHFDTAAWVTVSQKFKAVDLLTSIMEQIMGGRVGFNIRQCEVGKEIHDFLLQKRFLVVLDDVWETDTWEQINKMVKAFPDVANGSRVLLTTRKQDVANHVQMPTHVHHLKKLDEEKSWELFSSKALPPYNRSAVCDVDEFEELGKKLARKCNGLPLALAVFGGYLSKNLNKETWIDI	no	17,1,6,4,5,10,3,12,2,8,7	NA	1.2e-55	NA	NA	NA	NA	NA	NA	NA	NA	NA	NA	NA	NA
Hordeum vulgare	HORVU2Hr1G022620.5	CNL	partial	HORVU2Hr1G022620.5:8	HORVU2Hr1G022620.5:826	DKENNTLSAISIVAMGGAGKTSLVRKIYTSSRVKEHFDTAAWVTVSQKFKAVDLLTSIMEQIMGGRVGFNIRQCEVGKEIHDFLLQKRFLVVLDDVWETDTWEQINKMVKAFPDVANGSRVLLTTRKQDVANHVQMPTHVHHLKKLDEEKSWELFSSKALPPYNRSAVCDVDEFEELGKKLARKCNGLPLALAVFGGYLSKNLNKETWIDI	no	17,1,6,4,5,10,3,12,2,8,7,9,9,11	yes	2.8e-55	0.00015	NA	NA	NA	172	379	313	no	no	NA	NA	NA
Hordeum vulgare	HORVU2Hr1G022620.6	CNL	partial	HORVU2Hr1G022620.6:8	HORVU2Hr1G022620.6:516	DKENNTLSAISIVAMGGAGKTSLVRKIYTSSRVKEHFDTAAWVTVSQKFKAVDLLTSIMEQIMGGRVGFNIRQCEVGKEIHDFLLQKRFLVVLDDVWETDTWEQINKMVKAFPDVANGSRVLLTTRKQDVANHVQMPTHVHHLKKLDEEKSWELFSSKALPPYNRSAVCDVDEFEELGKKLARKCNGLPLALAVFGGYLSKNLNKETWIDI	no	17,1,6,4,5,10,3,12,2,8,7	NA	1.2e-55	NA	NA	NA	NA	NA	NA	NA	NA	NA	NA	NA	NA
Hordeum vulgare	HORVU2Hr1G022620.7	CNL	partial	HORVU2Hr1G022620.7:8	HORVU2Hr1G022620.7:516	DKENNTLSAISIVAMGGAGKTSLVRKIYTSSRVKEHFDTAAWVTVSQKFKAVDLLTSIMEQIMGGRVGFNIRQCEVGKEIHDFLLQKRFLVVLDDVWETDTWEQINKMVKAFPDVANGSRVLLTTRKQDVANHVQMPTHVHHLKKLDEEKSWELFSSKALPPYNRSAVCDVDEFEELGKKLARKCNGLPLALAVFGGYLSKNLNKETWIDI	no	17,1,6,4,5,10,3,12,2,8,7	NA	1.2e-55	NA	NA	NA	NA	NA	NA	NA	NA	NA	NA	NA	NA
Hordeum vulgare	HORVU2Hr1G022620.8	CNL	partial	HORVU2Hr1G022620.8:8	HORVU2Hr1G022620.8:826	DKENNTLSAISIVAMGGAGKTSLVRKIYTSSRVKEHFDTAAWVTVSQKFKAVDLLTSIMEQIMGGRVGFNIRQCEVGKEIHDFLLQKRFLVVLDDVWETDTWEQINKMVKAFPDVANGSRVLLTTRKQDVANHVQMPTHVHHLKKLDEEKSWELFSSKALPPYNRSAVCDVDEFEELGKKLARKCNGLPLALAVFGGYLSKNLNKETWIDI	no	17,1,6,4,5,10,3,12,2,8,7,9,9,11	yes	2.8e-55	0.00017	NA	NA	NA	172	379	320	no	no	NA	NA	NA
Hordeum vulgare	HORVU2Hr1G022620.9	CNL	partial	HORVU2Hr1G022620.9:8	HORVU2Hr1G022620.9:516	DKENNTLSAISIVAMGGAGKTSLVRKIYTSSRVKEHFDTAAWVTVSQKFKAVDLLTSIMEQIMGGRVGFNIRQCEVGKEIHDFLLQKRFLVVLDDVWETDTWEQINKMVKAFPDVANGSRVLLTTRKQDVANHVQMPTHVHHLKKLDEEKSWELFSSKALPPYNRSAVCDVDEFEELGKKLARKCNGLPLALAVFGGYLSKNLNKETWIDI	no	17,1,6,4,5,10,3,12,2,8,7	NA	1.2e-55	NA	NA	NA	NA	NA	NA	NA	NA	NA	NA	NA	NA
Hordeum vulgare	HORVU2Hr1G033910.1	CNL	partial	HORVU2Hr1G033910.1:15	HORVU2Hr1G033910.1:658	DESVKQLQVMSISGFGGLGKTTLAMTTYQTAGSSFQCQAFVTVSQKFDVKALVRDILRQIIQPVDRNGPISTEDPLKGMEEWDAGQLVNILSQHLEEKRYLVVLDDIWTISAWEDIRLFLPNSHTGSRIVVTTRSKTVAQACCLDEHDRAYEIEPLIGSESSELFFRRLFGNQDNCPIALREISQKILGKCGGIPLAIVSIAGLLASTSVY	no	17,16,1,6,4,5,16,3,12,2,8,7,9,9	yes	1.3e-42	0.072	NA	NA	NA	182	386	387	no	no	yes	NA	NA
Hordeum vulgare	HORVU2Hr1G033950.1	CNL	partial	HORVU2Hr1G033950.1:57	HORVU2Hr1G033950.1:307	NA	no	3,12,2,8,7,9	NA	1.5e-09	NA	NA	NA	NA	NA	NA	NA	NA	NA	NA	NA	NA
Hordeum vulgare	HORVU2Hr1G033950.2	CNL	partial	HORVU2Hr1G033950.2:27	HORVU2Hr1G033950.2:103	NA	no	17,16	NA	NA	NA	NA	NA	NA	NA	NA	NA	NA	NA	NA	NA	NA
Hordeum vulgare	HORVU2Hr1G033950.3	CNL	partial	HORVU2Hr1G033950.3:57	HORVU2Hr1G033950.3:307	NA	no	3,12,2,8,7,9	NA	1.3e-09	NA	NA	NA	NA	NA	NA	NA	NA	NA	NA	NA	NA
Hordeum vulgare	HORVU2Hr1G037710.1	CNL	complete	HORVU2Hr1G037710.1:15	HORVU2Hr1G037710.1:951	MARSKSYQVMSVWGIAGVGKSALVMNMFCDRICKGILFQKYGWVDVSHPFNLWNFSRILLSNLGSEYLQAGETEDLCTMGSRNPIVECREILKKHRCLVVIDGLQSTEEWDLIKANLVSGSHRQNVIIAVTIEQEMASHCRGVKGELVFNVKGLEADTAFELFKKVSKKSEVAELQELTSLCGGLPKVIVEVAVVFAKNTDRWKHTLSTKN	TRUE	17,16,6,4,5,1,6,4,3,2,8,11,11,9,1	yes	1.5e-35	0.095	NA	NA	NA	413	384	409	no	no	NA	NA	NA
Hordeum vulgare	HORVU2Hr1G037710.2	CNL	complete	HORVU2Hr1G037710.2:15	HORVU2Hr1G037710.2:951	MARSKSYQVMSVWGIAGVGKSALVMNMFCDRICKGILFQKYGWVDVSHPFNLWNFSRILLSNLGSEYLQAGETEDLCTMGSRNPIVECREILKKHRCLVVIDGLQSTEEWDLIKANLVSGSHRQNVIIAVTIEQEMASHCRGVKGELVFNVKGLEADTAFELFKKVSKKSEVAELQELTSLCGGLPKVIVEVAVVFAKNTDRWKHTLSTKN	TRUE	17,16,6,4,5,1,6,4,3,2,8,11,11,9,1	yes	1.5e-35	0.095	NA	NA	NA	413	384	409	no	no	yes	NA	NA
Hordeum vulgare	HORVU2Hr1G037710.3	CNL	partial	HORVU2Hr1G037710.3:16	HORVU2Hr1G037710.3:638	MARSKSYQVMSVWGIAGVGKSALVMNMFCDRICKGILFQKYGWVDVSHPFNLWNFSRILLSNLGSEYLQAGETEDLCTMGSRNPIVECREILKKHRCLVVIDGLQSTEEWDLIKANLVSGSHRQNVIIAVTIEQEMASHCRGVKGELVFNVKGLEADTAFELFKKVSKKSEVAELQELTSLCGGLPKVIVEVAVVFAKNTDRWKHTLSTKN	TRUE	5,1,6,4,3,2,8,11,11,9,1	yes	3.7e-26	0.015	NA	NA	NA	NA	NA	NA	NA	NA	NA	NA	NA
Hordeum vulgare	HORVU2Hr1G037710.4	CNL	complete	HORVU2Hr1G037710.4:15	HORVU2Hr1G037710.4:951	MARSKSYQVMSVWGIAGVGKSALVMNMFCDRICKGILFQKYGWVDVSHPFNLWNFSRILLSNLGSEYLQAGETEDLCTMGSRNPIVECREILKKHRCLVVIDGLQSTEEWDLIKANLVSGSHRQNVIIAVTIEQEMASHCRGVKGELVFNVKGLEADTAFELFKKVSKKSEVAELQELTSLCGGLPKVIVEVAVVFAKNTDRWKHTLSTKN	TRUE	17,16,6,4,5,1,6,4,3,2,8,11,11,9,1	yes	1.5e-35	0.095	NA	NA	NA	413	384	409	no	no	NA	NA	NA
Hordeum vulgare	HORVU2Hr1G038230.1	CNL	complete	HORVU2Hr1G038230.1:22	HORVU2Hr1G038230.1:870	SDLQQENVISTVWGMGGVGKTTLVAHVYNTLKIDFDCAAWITVSKAYQVQDLLKQIIRELQKSDLKGELRVDIVDMKKRSLVEIIRDFLRGKKYLLVLDDVWGIDIWFKIRDAFPTNSTSRFVITSRIHDVALLATGNCMVELKPLEEHHSWELFCKEAFWKNENRICPEELQSLAQRFVDKCNGLPIAIACIGRLLSCKSQTHSEWEKLY	no	17,16,1,6,4,5,10,3,2,8,7,9,9,9,11,11	yes	2.1e-49	0.001	NA	NA	NA	176	374	370	no	no	NA	NA	NA
Hordeum vulgare	HORVU2Hr1G038230.10	CNL	complete	HORVU2Hr1G038230.10:87	HORVU2Hr1G038230.10:935	SDLQQENVISTVWGMGGVGKTTLVAHVYNTLKIDFDCAAWITVSKAYQVQDLLKQIIRELQKSDLKGELRVDIVDMKKRSLVEIIRDFLRGKKYLLVLDDVWGIDIWFKIRDAFPTNSTSRFVITSRIHDVALLATGNCMVELKPLEEHHSWELFCKEAFWKNENRICPEELQSLAQRFVDKCNGLPIAIACIGRLLSCKSQTHSEWEKLY	no	17,16,1,6,4,5,10,3,2,8,7,9,9,9,11,11	yes	2.5e-49	0.00074	NA	NA	NA	241	374	370	no	no	NA	NA	NA
Hordeum vulgare	HORVU2Hr1G038230.11	CNL	complete	HORVU2Hr1G038230.11:84	HORVU2Hr1G038230.11:932	SDLQQENVISTVWGMGGVGKTTLVAHVYNTLKIDFDCAAWITVSKAYQVQDLLKQIIRELQKSDLKGELRVDIVDMKKRSLVEIIRDFLRGKKYLLVLDDVWGIDIWFKIRDAFPTNSTSRFVITSRIHDVALLATGNCMVELKPLEEHHSWELFCKEAFWKNENRICPEELQSLAQRFVDKCNGLPIAIACIGRLLSCKSQTHSEWEKLY	no	17,16,1,6,4,5,10,3,2,8,7,9,9,9,11,11	yes	2.4e-49	0.00062	NA	NA	NA	238	374	370	no	no	NA	NA	NA
Hordeum vulgare	HORVU2Hr1G038230.12	CNL	complete	HORVU2Hr1G038230.12:125	HORVU2Hr1G038230.12:973	SDLQQENVISTVWGMGGVGKTTLVAHVYNTLKIDFDCAAWITVSKAYQVQDLLKQIIRELQKSDLKGELRVDIVDMKKRSLVEIIRDFLRGKKYLLVLDDVWGIDIWFKIRDAFPTNSTSRFVITSRIHDVALLATGNCMVELKPLEEHHSWELFCKEAFWKNENRICPEELQSLAQRFVDKCNGLPIAIACIGRLLSCKSQTHSEWEKLY	no	17,16,1,6,4,5,10,3,2,8,7,9,9,9,11,11	yes	2.7e-49	0.0013	NA	NA	NA	279	374	370	no	no	NA	NA	NA
Hordeum vulgare	HORVU2Hr1G038230.14	CNL	complete	HORVU2Hr1G038230.14:48	HORVU2Hr1G038230.14:896	SDLQQENVISTVWGMGGVGKTTLVAHVYNTLKIDFDCAAWITVSKAYQVQDLLKQIIRELQKSDLKGELRVDIVDMKKRSLVEIIRDFLRGKKYLLVLDDVWGIDIWFKIRDAFPTNSTSRFVITSRIHDVALLATGNCMVELKPLEEHHSWELFCKEAFWKNENRICPEELQSLAQRFVDKCNGLPIAIACIGRLLSCKSQTHSEWEKLY	no	17,16,1,6,4,5,10,3,2,8,7,9,9,9,11,11	yes	2.3e-49	0.0008	NA	NA	NA	202	374	370	no	no	NA	NA	NA
Hordeum vulgare	HORVU2Hr1G038230.15	CNL	complete	HORVU2Hr1G038230.15:22	HORVU2Hr1G038230.15:870	SDLQQENVISTVWGMGGVGKTTLVAHVYNTLKIDFDCAAWITVSKAYQVQDLLKQIIRELQKSDLKGELRVDIVDMKKRSLVEIIRDFLRGKKYLLVLDDVWGIDIWFKIRDAFPTNSTSRFVITSRIHDVALLATGNCMVELKPLEEHHSWELFCKEAFWKNENRICPEELQSLAQRFVDKCNGLPIAIACIGRLLSCKSQTHSEWEKLY	no	17,16,1,6,4,5,10,3,2,8,7,9,9,9,11,11	yes	2.1e-49	0.001	NA	NA	NA	176	374	370	no	no	NA	NA	NA
Hordeum vulgare	HORVU2Hr1G038230.16	CNL	complete	HORVU2Hr1G038230.16:22	HORVU2Hr1G038230.16:870	SDLQQENVISTVWGMGGVGKTTLVAHVYNTLKIDFDCAAWITVSKAYQVQDLLKQIIRELQKSDLKGELRVDIVDMKKRSLVEIIRDFLRGKKYLLVLDDVWGIDIWFKIRDAFPTNSTSRFVITSRIHDVALLATGNCMVELKPLEEHHSWELFCKEAFWKNENRICPEELQSLAQRFVDKCNGLPIAIACIGRLLSCKSQTHSEWEKLY	no	17,16,1,6,4,5,10,3,2,8,7,9,9,9,11,11	yes	2.1e-49	0.001	NA	NA	NA	176	374	370	no	no	NA	NA	NA
Hordeum vulgare	HORVU2Hr1G038230.17	CNL	complete	HORVU2Hr1G038230.17:22	HORVU2Hr1G038230.17:870	SDLQQENVISTVWGMGGVGKTTLVAHVYNTLKIDFDCAAWITVSKAYQVQDLLKQIIRELQKSDLKGELRVDIVDMKKRSLVEIIRDFLRGKKYLLVLDDVWGIDIWFKIRDAFPTNSTSRFVITSRIHDVALLATGNCMVELKPLEEHHSWELFCKEAFWKNENRICPEELQSLAQRFVDKCNGLPIAIACIGRLLSCKSQTHSEWEKLY	no	17,16,1,6,4,5,10,3,2,8,7,9,9,9,11,11	yes	2.1e-49	0.001	NA	NA	NA	176	374	370	no	no	NA	NA	NA
Hordeum vulgare	HORVU2Hr1G038230.18	CNL	partial	HORVU2Hr1G038230.18:22	HORVU2Hr1G038230.18:832	SDLQQENVISTVWGMGGVGKTTLVAHVYNTLKIDFDCAAWITVSKAYQVQDLLKQIIRELQKSDLKGELRVDIVDMKKRSLVEIIRDFLRGKKYLLVLDDVWGIDIWFKIRDAFPTNSTSRFVITSRIHDVALLATGNCMVELKPLEEHHSWELFCRLLSCKSQTHSEWEKLYKELEVQLTNNAILDVNIVLMVSLGDLPYILKNCFLHCI	no	17,16,1,6,4,5,10,2,8,7,9,9,9,11,11	yes	1.5e-32	0.019	NA	NA	NA	176	336	370	no	no	yes	NA	NA
Hordeum vulgare	HORVU2Hr1G038230.2	CNL	complete	HORVU2Hr1G038230.2:22	HORVU2Hr1G038230.2:870	SDLQQENVISTVWGMGGVGKTTLVAHVYNTLKIDFDCAAWITVSKAYQVQDLLKQIIRELQKSDLKGELRVDIVDMKKRSLVEIIRDFLRGKKYLLVLDDVWGIDIWFKIRDAFPTNSTSRFVITSRIHDVALLATGNCMVELKPLEEHHSWELFCKEAFWKNENRICPEELQSLAQRFVDKCNGLPIAIACIGRLLSCKSQTHSEWEKLY	no	17,16,1,6,4,5,10,3,2,8,7,9,9,9,11,11	yes	2.1e-49	0.001	NA	NA	NA	176	374	370	no	no	NA	NA	NA
Hordeum vulgare	HORVU2Hr1G038230.3	CNL	complete	HORVU2Hr1G038230.3:22	HORVU2Hr1G038230.3:870	SDLQQENVISTVWGMGGVGKTTLVAHVYNTLKIDFDCAAWITVSKAYQVQDLLKQIIRELQKSDLKGELRVDIVDMKKRSLVEIIRDFLRGKKYLLVLDDVWGIDIWFKIRDAFPTNSTSRFVITSRIHDVALLATGNCMVELKPLEEHHSWELFCKEAFWKNENRICPEELQSLAQRFVDKCNGLPIAIACIGRLLSCKSQTHSEWEKLY	no	17,16,1,6,4,5,10,3,2,8,7,9,9,9,11,11	yes	2.1e-49	0.001	NA	NA	NA	176	374	370	no	no	NA	NA	NA
Hordeum vulgare	HORVU2Hr1G038230.4	CNL	complete	HORVU2Hr1G038230.4:22	HORVU2Hr1G038230.4:870	SDLQQENVISTVWGMGGVGKTTLVAHVYNTLKIDFDCAAWITVSKAYQVQDLLKQIIRELQKSDLKGELRVDIVDMKKRSLVEIIRDFLRGKKYLLVLDDVWGIDIWFKIRDAFPTNSTSRFVITSRIHDVALLATGNCMVELKPLEEHHSWELFCKEAFWKNENRICPEELQSLAQRFVDKCNGLPIAIACIGRLLSCKSQTHSEWEKLY	no	17,16,1,6,4,5,10,3,2,8,7,9,9,9,11,11	yes	2.1e-49	0.001	NA	NA	NA	176	374	370	no	no	NA	NA	NA
Hordeum vulgare	HORVU2Hr1G038230.5	CNL	complete	HORVU2Hr1G038230.5:22	HORVU2Hr1G038230.5:870	SDLQQENVISTVWGMGGVGKTTLVAHVYNTLKIDFDCAAWITVSKAYQVQDLLKQIIRELQKSDLKGELRVDIVDMKKRSLVEIIRDFLRGKKYLLVLDDVWGIDIWFKIRDAFPTNSTSRFVITSRIHDVALLATGNCMVELKPLEEHHSWELFCKEAFWKNENRICPEELQSLAQRFVDKCNGLPIAIACIGRLLSCKSQTHSEWEKLY	no	17,16,1,6,4,5,10,3,2,8,7,9,9,9,11,11	yes	2.1e-49	0.001	NA	NA	NA	176	374	370	no	no	NA	NA	NA
Hordeum vulgare	HORVU2Hr1G038230.6	CNL	complete	HORVU2Hr1G038230.6:22	HORVU2Hr1G038230.6:870	SDLQQENVISTVWGMGGVGKTTLVAHVYNTLKIDFDCAAWITVSKAYQVQDLLKQIIRELQKSDLKGELRVDIVDMKKRSLVEIIRDFLRGKKYLLVLDDVWGIDIWFKIRDAFPTNSTSRFVITSRIHDVALLATGNCMVELKPLEEHHSWELFCKEAFWKNENRICPEELQSLAQRFVDKCNGLPIAIACIGRLLSCKSQTHSEWEKLY	no	17,16,1,6,4,5,10,3,2,8,7,9,9,9,11,11	yes	2.1e-49	0.001	NA	NA	NA	176	374	370	no	no	NA	NA	NA
Hordeum vulgare	HORVU2Hr1G038230.7	CNL	complete	HORVU2Hr1G038230.7:22	HORVU2Hr1G038230.7:870	SDLQQENVISTVWGMGGVGKTTLVAHVYNTLKIDFDCAAWITVSKAYQVQDLLKQIIRELQKSDLKGELRVDIVDMKKRSLVEIIRDFLRGKKYLLVLDDVWGIDIWFKIRDAFPTNSTSRFVITSRIHDVALLATGNCMVELKPLEEHHSWELFCKEAFWKNENRICPEELQSLAQRFVDKCNGLPIAIACIGRLLSCKSQTHSEWEKLY	no	17,16,1,6,4,5,10,3,2,8,7,9,9,9,11,11	yes	2.1e-49	0.001	NA	NA	NA	176	374	370	no	no	NA	NA	NA
Hordeum vulgare	HORVU2Hr1G038230.8	CNL	complete	HORVU2Hr1G038230.8:91	HORVU2Hr1G038230.8:939	SDLQQENVISTVWGMGGVGKTTLVAHVYNTLKIDFDCAAWITVSKAYQVQDLLKQIIRELQKSDLKGELRVDIVDMKKRSLVEIIRDFLRGKKYLLVLDDVWGIDIWFKIRDAFPTNSTSRFVITSRIHDVALLATGNCMVELKPLEEHHSWELFCKEAFWKNENRICPEELQSLAQRFVDKCNGLPIAIACIGRLLSCKSQTHSEWEKLY	no	17,16,1,6,4,5,10,3,2,8,7,9,9,9,11,11	yes	2.5e-49	0.00079	NA	NA	NA	245	374	370	no	no	yes	NA	NA
Hordeum vulgare	HORVU2Hr1G038230.9	CNL	complete	HORVU2Hr1G038230.9:22	HORVU2Hr1G038230.9:870	SDLQQENVISTVWGMGGVGKTTLVAHVYNTLKIDFDCAAWITVSKAYQVQDLLKQIIRELQKSDLKGELRVDIVDMKKRSLVEIIRDFLRGKKYLLVLDDVWGIDIWFKIRDAFPTNSTSRFVITSRIHDVALLATGNCMVELKPLEEHHSWELFCKEAFWKNENRICPEELQSLAQRFVDKCNGLPIAIACIGRLLSCKSQTHSEWEKLY	no	17,16,1,6,4,5,10,3,2,8,7,9,9,9,11,11	yes	2.1e-49	0.001	NA	NA	NA	176	374	370	no	no	NA	NA	NA
Hordeum vulgare	HORVU2Hr1G039670.1	NA	partial	HORVU2Hr1G039670.1:53	HORVU2Hr1G039670.1:138	NA	no	18,15	NA	NA	NA	NA	NA	NA	NA	NA	NA	NA	NA	NA	NA	NA
Hordeum vulgare	HORVU2Hr1G040600.1	CNL	complete	HORVU2Hr1G040600.1:11	HORVU2Hr1G040600.1:654	EVSKKQLKVVSIVGFGGLGKTTLANAVYQKLKGQVDPQKQTPQFDCAAFISVSLNPNIKKIFKSLLHQLDKQTYQSINESSWGEEQLISEIRTFLRNKRYLIVIDDIWDKSVWENIKYALTENEYESRVITTTRILDVAQQAGGVYRLRPLSVVDSRKLFHQRIYETENKSPPNQLFEISEKILQRCGGVPLAIITIGSLLSSKTERSHTH	no	17,16,14,1,6,4,5,10,3,12,2,8,7,11,9,11	yes	2.1e-45	0.0063	NA	NA	NA	174	390	300	no	no	yes	NA	NA
Hordeum vulgare	HORVU2Hr1G064140.11	TNL	partial	HORVU2Hr1G064140.11:195	HORVU2Hr1G064140.11:354	VDDEVLFRTAGIAGIHGSGKTALAQKVFVHDRIKDAFPLRLWVCVGPPDSEDRFNLLYRMLDNLGLDTAKVEDIVDKAEVVVKAATPDDKERSKIGVLLFILYVTLYKTGYLIVFDDMRAYSDWYSNLTLQPPKEDEWYERLAYGLPKARKSAVLVTCRSEDHARVMVRTGGVFHPPKLEGEDGWKLFHREYKAAKDKDNKDKGEKEEEDK	no	1,4,5	NA	6.2e-21	NA	NA	NA	NA	NA	NA	NA	NA	NA	NA	NA	NA
Hordeum vulgare	HORVU2Hr1G064140.37	TNL	partial	HORVU2Hr1G064140.37:195	HORVU2Hr1G064140.37:354	VDDEVLFRTAGIAGIHGSGKTALAQKVFVHDRIKDAFPLRLWVCVGPPDSEDRFNLLYRMLDNLGLDTAKVEDIVDKAEVVVKAATPDDKERSKIGVLLFILYVTLYKTGYLIVFDDMRAYSDWYSNLTLQPPKEDEWYERLAYGLPKARKSAVLVTCRSEDHARVMVRTGGVFHPPKLEGEDGWKLFHREYKAAKDKDNKDKGEKEEEDK	no	1,4,5	NA	6.2e-21	NA	NA	NA	NA	NA	NA	NA	NA	NA	NA	NA	NA
Hordeum vulgare	HORVU2Hr1G064140.55	TNL	partial	HORVU2Hr1G064140.55:195	HORVU2Hr1G064140.55:354	VDDEVLFRTAGIAGIHGSGKTALAQKVFVHDRIKDAFPLRLWVCVGPPDSEDRFNLLYRMLDNLGLDTAKVEDIVDKAEVVVKAATPDDKERSKIGVLLFILYVTLYKTGYLIVFDDMRAYSDWYSNLTLQPPKEDEWYERLAYGLPKARKSAVLVTCRSEDHARVMVRTGGVFHPPKLEGEDGWKLFHREYKAAKDKDNKDKGEKEEEDK	no	1,4,5	NA	6.2e-21	NA	NA	NA	NA	NA	NA	NA	NA	NA	NA	NA	NA
Hordeum vulgare	HORVU2Hr1G064140.56	TNL	partial	HORVU2Hr1G064140.56:151	HORVU2Hr1G064140.56:310	VDDEVLFRTAGIAGIHGSGKTALAQKVFVHDRIKDAFPLRLWVCVGPPDSEDRFNLLYRMLDNLGLDTAKVEDIVDKAEVVVKAATPDDKERSKIGVLLFILYVTLYKTGYLIVFDDMRAYSDWYSNLTLQPPKEDEWYERLAYGLPKARKSAVLVTCRSEDHARVMVRTGGVFHPPKLEGEDGWKLFHREYKAAKDKDNKDKGEKEEEDK	no	1,4,5	NA	5e-21	NA	NA	NA	NA	NA	NA	NA	NA	NA	NA	NA	NA
Hordeum vulgare	HORVU2Hr1G087730.12	CNL	partial	HORVU2Hr1G087730.12:44	HORVU2Hr1G087730.12:1107	RKSRDGVAVLAILGMGGVGKTTLAQVVYNDQRVQDHFDLRMWVCLPESPDVILVTKAIIESATKGAAAQTGLGNLDSLQVVLRDLVSSKRFLLVLDNVWCEDSLEFQTLVAPLKFGHPGSAILVTGRSCKVADAAGAVELLCLNGLPEEAYWELFKQYACGDEDPAGHPELVAIGKKIAHRLKGSPLAAKTVGGALSSDMSTKHWNIVMAS	no	17,17,1,6,4,5,10,3,12,2,8,7,9,9,11,11,11,11,11,11,11,11,11	yes	4.2e-35	NA	NA	NA	NA	NA	NA	NA	NA	NA	NA	NA	NA
Hordeum vulgare	HORVU2Hr1G087730.13	CNL	partial	HORVU2Hr1G087730.13:44	HORVU2Hr1G087730.13:1107	RKSRDGVAVLAILGMGGVGKTTLAQVVYNDQRVQDHFDLRMWVCLPESPDVILVTKAIIESATKGAAAQTGLGNLDSLQVVLRDLVSSKRFLLVLDNVWCEDSLEFQTLVAPLKFGHPGSAILVTGRSCKVADAAGAVELLCLNGLPEEAYWELFKQYACGDEDPAGHPELVAIGKKIAHRLKGSPLAAKTVGGALSSDMSTKHWNIVMAS	no	17,17,1,6,4,5,10,3,12,2,8,7,9,9,11,11,11,11,11,11,11,11,11	yes	4.2e-35	NA	NA	NA	NA	NA	NA	NA	NA	NA	NA	NA	NA
Hordeum vulgare	HORVU2Hr1G087730.14	CNL	partial	HORVU2Hr1G087730.14:70	HORVU2Hr1G087730.14:1048	RKSRDGVAVLAILGMGGVGKTTLAQVVYNDQRVQDHFDLRMWVCLPESPDVILVTKAIIESATKGAAAQTGLGNLDSLQVVLRDLVSSKRFLLVLDNVWCEDSLEFQTLVAPLKFGHPGSAILVTGRSCKVADAAGAVELLCLNGLPEEAYWELFKQYACGDEDPAGHPELVAIGKKIAHRLKGSPLAAKTVGGALSSDMSTKHWNIVMAS	no	17,1,6,4,5,10,3,12,2,8,7,9,9,11,11,11,11,11,11,11,11,11	yes	3.9e-35	4.7e-05	NA	NA	NA	133	386	562	no	no	yes	NA	NA
Hordeum vulgare	HORVU2Hr1G087730.15	CNL	partial	HORVU2Hr1G087730.15:55	HORVU2Hr1G087730.15:925	RKSRDGVAVLAILGMGGVGKTTLAQVVYNDQRVQDHFDLRMWVCLPESPDVILVTKAIIESATKGAAAQTGLGNLDSLQVVLRDLVSSKRFLLVLDNVWCEDSLEFQTLVAPLKFGHPGSAILVTGRSCKVADAAGAVELLCLNGLPEEAYWELFKQYACGDEDPAGHPELVAIGKKIAHRLKGSPLAAKTVGGALSSDMSTKHWNIVMAS	no	1,6,4,5,10,3,12,2,8,7,9,9,11,11,11,11,11,11,11,11,11	yes	3.1e-35	3.4e-05	NA	NA	NA	10	386	562	TRUE	no	NA	NA	NA
Hordeum vulgare	HORVU2Hr1G087730.16	CNL	partial	HORVU2Hr1G087730.16:48	HORVU2Hr1G087730.16:918	RKSRDGVAVLAILGMGGVGKTTLAQVVYNDQRVQDHFDLRMWVCLPESPDVILVTKAIIESATKGAAAQTGLGNLDSLQVVLRDLVSSKRFLLVLDNVWCEDSLEFQTLVAPLKFGHPGSAILVTGRSCKVADAAGAVELLCLNGLPEEAYWELFKQYACGDEDPAGHPELVAIGKKIAHRLKGSPLAAKTVGGALSSDMSTKHWNIVMAS	no	1,6,4,5,10,3,12,2,8,7,9,9,11,11,11,11,11,11,11,11,11	yes	3.1e-35	3.2e-05	NA	NA	NA	3	386	562	TRUE	no	NA	NA	NA
Hordeum vulgare	HORVU2Hr1G087730.4	CNL	partial	HORVU2Hr1G087730.4:73	HORVU2Hr1G087730.4:741	RKSRDGVAVLAILGMGGVGKTTLAQVVYNDQRVQDHFDLRMWVCLPESPDVILVTKAIIESATKGAAAQTGLGNLDSLQVVLRDLVSSKRFLLVLDNVWCEDSLEFQTLVAPLKFGHPGSAILVTGRSCKVADAAGAVELLCLNGLPEEAYWELFKQYACGDEDPAGHPELVAIGKKIAHRLKGSPLAAKTVGGALSSDMSTKHWNIVMAS	no	1,6,4,5,10,3,12,2,8,7,9,9,11,11,11	yes	2.4e-35	1.9e-05	NA	NA	NA	28	386	372	TRUE	no	NA	NA	NA
Hordeum vulgare	HORVU2Hr1G089020.1	CNL	partial	HORVU2Hr1G089020.1:182	HORVU2Hr1G089020.1:878	LFEKGDSNIIGVWGQGGVGKTTLLHVFNNDLEKKAHDYQVVIFIEVSNSEALNTMEIQQTISERLNLPWNDAEPIAKRARFLIKALARKRFVILLDDVRKKFRLEDVGIPTPDTNSRSKLILTSRYQEVCFQMNAQRSLIKMQILGNDASWELFLSKLSKEASAAVESLGLQNTSREHAMAIARSCGGLPLALNVIGTAVAGLEESEWKSA	no	1,4,5,10,3,12,2,7,9,9,11,11,11,11,11	yes	1.8e-43	4.4e-11	NA	NA	NA	162	370	387	no	no	NA	NA	NA
Hordeum vulgare	HORVU2Hr1G089020.10	CNL	partial	HORVU2Hr1G089020.10:182	HORVU2Hr1G089020.10:878	LFEKGDSNIIGVWGQGGVGKTTLLHVFNNDLEKKAHDYQVVIFIEVSNSEALNTMEIQQTISERLNLPWNDAEPIAKRARFLIKALARKRFVILLDDVRKKFRLEDVGIPTPDTNSRSKLILTSRYQEVCFQMNAQRSLIKMQILGNDASWELFLSKLSKEASAAVESLGLQNTSREHAMAIARSCGGLPLALNVIGTAVAGLEESEWKSA	no	1,4,5,10,3,12,2,7,9,9,11,11,11,11,11	yes	1.8e-43	4.4e-11	NA	NA	NA	162	370	387	no	no	NA	NA	NA
Hordeum vulgare	HORVU2Hr1G089020.11	CNL	partial	HORVU2Hr1G089020.11:182	HORVU2Hr1G089020.11:878	LFEKGDSNIIGVWGQGGVGKTTLLHVFNNDLEKKAHDYQVVIFIEVSNSEALNTMEIQQTISERLNLPWNDAEPIAKRARFLIKALARKRFVILLDDVRKKFRLEDVGIPTPDTNSRSKLILTSRYQEVCFQMNAQRSLIKMQILGNDASWELFLSKLSKEASAAVESLGLQNTSREHAMAIARSCGGLPLALNVIGTAVAGLEESEWKSA	no	1,4,5,10,3,12,2,7,9,9,11,11,11,11,11	yes	1.8e-43	4.4e-11	NA	NA	NA	162	370	387	no	no	NA	NA	NA
Hordeum vulgare	HORVU2Hr1G089020.12	CNL	partial	HORVU2Hr1G089020.12:178	HORVU2Hr1G089020.12:874	LFEKGDSNIIGVWGQGGVGKTTLLHVFNNDLEKKAHDYQVVIFIEVSNSEALNTMEIQQTISERLNLPWNDAEPIAKRARFLIKALARKRFVILLDDVRKKFRLEDVGIPTPDTNSRSKLILTSRYQEVCFQMNAQRSLIKMQILGNDASWELFLSKLSKEASAAVESLGLQNTSREHAMAIARSCGGLPLALNVIGTAVAGLEESEWKSA	no	1,4,5,10,3,12,2,7,9,9,11,11,11,11,11	yes	1.8e-43	4.4e-11	NA	NA	NA	158	370	387	no	no	yes	NA	NA
Hordeum vulgare	HORVU2Hr1G089020.13	CNL	partial	HORVU2Hr1G089020.13:178	HORVU2Hr1G089020.13:874	LFEKGDSNIIGVWGQGGVGKTTLLHVFNNDLEKKAHDYQVVIFIEVSNSEALNTMEIQQTISERLNLPWNDAEPIAKRARFLIKALARKRFVILLDDVRKKFRLEDVGIPTPDTNSRSKLILTSRYQEVCFQMNAQRSLIKMQILGNDASWELFLSKLSKEASAAVESLGLQNTSREHAMAIARSCGGLPLALNVIGTAVAGLEESEWKSA	no	1,4,5,10,3,12,2,7,9,9,11,11,11,11,11	yes	1.8e-43	4.4e-11	NA	NA	NA	158	370	387	no	no	NA	NA	NA
Hordeum vulgare	HORVU2Hr1G089020.14	CNL	partial	HORVU2Hr1G089020.14:182	HORVU2Hr1G089020.14:878	LFEKGDSNIIGVWGQGGVGKTTLLHVFNNDLEKKAHDYQVVIFIEVSNSEALNTMEIQQTISERLNLPWNDAEPIAKRARFLIKALARKRFVILLDDVRKKFRLEDVGIPTPDTNSRSKLILTSRYQEVCFQMNAQRSLIKMQILGNDASWELFLSKLSKEASAAVESLGLQNTSREHAMAIARSCGGLPLALNVIGTAVAGLEESEWKSA	no	1,4,5,10,3,12,2,7,9,9,11,11,11,11,11	yes	1.8e-43	4.4e-11	NA	NA	NA	162	370	387	no	no	NA	NA	NA
Hordeum vulgare	HORVU2Hr1G089020.15	CNL	partial	HORVU2Hr1G089020.15:37	HORVU2Hr1G089020.15:653	NA	no	4,5,10,3,12,2,7,9,9,11,11,11,11,11	NA	2.8e-29	1.3e-11	NA	NA	NA	NA	NA	NA	NA	NA	NA	NA	NA
Hordeum vulgare	HORVU2Hr1G089020.16	CNL	partial	HORVU2Hr1G089020.16:67	HORVU2Hr1G089020.16:683	NA	no	4,5,10,3,12,2,7,9,9,11,11,11,11,11	NA	1e-30	1.4e-11	NA	NA	NA	NA	NA	NA	NA	NA	NA	NA	NA
Hordeum vulgare	HORVU2Hr1G089020.17	CNL	partial	HORVU2Hr1G089020.17:182	HORVU2Hr1G089020.17:878	LFEKGDSNIIGVWGQGGVGKTTLLHVFNNDLEKKAHDYQVVIFIEVSNSEALNTMEIQQTISERLNLPWNDAEPIAKRARFLIKALARKRFVILLDDVRKKFRLEDVGIPTPDTNSRSKLILTSRYQEVCFQMNAQRSLIKMQILGNDASWELFLSKLSKEASAAVESLGLQNTSREHAMAIARSCGGLPLALNVIGTAVAGLEESEWKSA	no	1,4,5,10,3,12,2,7,9,9,11,11,11,11,11	yes	1.8e-43	4.4e-11	NA	NA	NA	162	370	387	no	no	NA	NA	NA
Hordeum vulgare	HORVU2Hr1G089020.19	CNL	partial	HORVU2Hr1G089020.19:178	HORVU2Hr1G089020.19:845	LFEKGDSNIIGVWGQGGVGKTTLLHVFNNDLEKKAHDYQVVIFIEVSNSEALNTMEIQQTISERLNLPWNDAEPIAKRARFLIKALARKRFVILLDDVRKKFRLEDVGIPTPDTNSRSKLILTSRYQELSKEASAAVESLGLQNTSREHAMAIARSCGGLPLALNVIGTAVAGLEESEWKSAADAIATNMENINGVDEMFGQLKYSYDSLT	no	1,4,5,3,12,2,7,9,9,11,11,11,11,11	yes	7.3e-34	3.7e-11	NA	NA	NA	158	341	387	no	no	yes	NA	NA
Hordeum vulgare	HORVU2Hr1G089020.2	CNL	partial	HORVU2Hr1G089020.2:182	HORVU2Hr1G089020.2:878	LFEKGDSNIIGVWGQGGVGKTTLLHVFNNDLEKKAHDYQVVIFIEVSNSEALNTMEIQQTISERLNLPWNDAEPIAKRARFLIKALARKRFVILLDDVRKKFRLEDVGIPTPDTNSRSKLILTSRYQEVCFQMNAQRSLIKMQILGNDASWELFLSKLSKEASAAVESLGLQNTSREHAMAIARSCGGLPLALNVIGTAVAGLEESEWKSA	no	1,4,5,10,3,12,2,7,9,9,11,11,11,11,11	yes	1.8e-43	4.4e-11	NA	NA	NA	162	370	387	no	no	NA	NA	NA
Hordeum vulgare	HORVU2Hr1G089020.20	CNL	partial	HORVU2Hr1G089020.20:37	HORVU2Hr1G089020.20:653	NA	no	4,5,10,3,12,2,7,9,9,11,11,11,11,11	NA	2.8e-29	1.3e-11	NA	NA	NA	NA	NA	NA	NA	NA	NA	NA	NA
Hordeum vulgare	HORVU2Hr1G089020.3	CNL	partial	HORVU2Hr1G089020.3:182	HORVU2Hr1G089020.3:878	LFEKGDSNIIGVWGQGGVGKTTLLHVFNNDLEKKAHDYQVVIFIEVSNSEALNTMEIQQTISERLNLPWNDAEPIAKRARFLIKALARKRFVILLDDVRKKFRLEDVGIPTPDTNSRSKLILTSRYQEVCFQMNAQRSLIKMQILGNDASWELFLSKLSKEASAAVESLGLQNTSREHAMAIARSCGGLPLALNVIGTAVAGLEESEWKSA	no	1,4,5,10,3,12,2,7,9,9,11,11,11,11,11	yes	1.8e-43	4.4e-11	NA	NA	NA	162	370	387	no	no	NA	NA	NA
Hordeum vulgare	HORVU2Hr1G089020.4	CNL	partial	HORVU2Hr1G089020.4:182	HORVU2Hr1G089020.4:878	LFEKGDSNIIGVWGQGGVGKTTLLHVFNNDLEKKAHDYQVVIFIEVSNSEALNTMEIQQTISERLNLPWNDAEPIAKRARFLIKALARKRFVILLDDVRKKFRLEDVGIPTPDTNSRSKLILTSRYQEVCFQMNAQRSLIKMQILGNDASWELFLSKLSKEASAAVESLGLQNTSREHAMAIARSCGGLPLALNVIGTAVAGLEESEWKSA	no	1,4,5,10,3,12,2,7,9,9,11,11,11,11,11	yes	1.8e-43	4.4e-11	NA	NA	NA	162	370	387	no	no	NA	NA	NA
Hordeum vulgare	HORVU2Hr1G089020.5	CNL	partial	HORVU2Hr1G089020.5:37	HORVU2Hr1G089020.5:653	NA	no	4,5,10,3,12,2,7,9,9,11,11,11,11,11	NA	2.8e-29	1.3e-11	NA	NA	NA	NA	NA	NA	NA	NA	NA	NA	NA
Hordeum vulgare	HORVU2Hr1G089020.6	CNL	partial	HORVU2Hr1G089020.6:182	HORVU2Hr1G089020.6:878	LFEKGDSNIIGVWGQGGVGKTTLLHVFNNDLEKKAHDYQVVIFIEVSNSEALNTMEIQQTISERLNLPWNDAEPIAKRARFLIKALARKRFVILLDDVRKKFRLEDVGIPTPDTNSRSKLILTSRYQEVCFQMNAQRSLIKMQILGNDASWELFLSKLSKEASAAVESLGLQNTSREHAMAIARSCGGLPLALNVIGTAVAGLEESEWKSA	no	1,4,5,10,3,12,2,7,9,9,11,11,11,11,11	yes	1.8e-43	4.4e-11	NA	NA	NA	162	370	387	no	no	NA	NA	NA
Hordeum vulgare	HORVU2Hr1G089020.7	CNL	partial	HORVU2Hr1G089020.7:182	HORVU2Hr1G089020.7:878	LFEKGDSNIIGVWGQGGVGKTTLLHVFNNDLEKKAHDYQVVIFIEVSNSEALNTMEIQQTISERLNLPWNDAEPIAKRARFLIKALARKRFVILLDDVRKKFRLEDVGIPTPDTNSRSKLILTSRYQEVCFQMNAQRSLIKMQILGNDASWELFLSKLSKEASAAVESLGLQNTSREHAMAIARSCGGLPLALNVIGTAVAGLEESEWKSA	no	1,4,5,10,3,12,2,7,9,9,11,11,11,11,11	yes	1.8e-43	4.4e-11	NA	NA	NA	162	370	387	no	no	NA	NA	NA
Hordeum vulgare	HORVU2Hr1G089020.8	CNL	partial	HORVU2Hr1G089020.8:182	HORVU2Hr1G089020.8:878	LFEKGDSNIIGVWGQGGVGKTTLLHVFNNDLEKKAHDYQVVIFIEVSNSEALNTMEIQQTISERLNLPWNDAEPIAKRARFLIKALARKRFVILLDDVRKKFRLEDVGIPTPDTNSRSKLILTSRYQEVCFQMNAQRSLIKMQILGNDASWELFLSKLSKEASAAVESLGLQNTSREHAMAIARSCGGLPLALNVIGTAVAGLEESEWKSA	no	1,4,5,10,3,12,2,7,9,9,11,11,11,11,11	yes	1.8e-43	4.4e-11	NA	NA	NA	162	370	387	no	no	NA	NA	NA
Hordeum vulgare	HORVU2Hr1G089020.9	CNL	partial	HORVU2Hr1G089020.9:67	HORVU2Hr1G089020.9:683	NA	no	4,5,10,3,12,2,7,9,9,11,11,11,11,11	NA	1e-30	1.4e-11	NA	NA	NA	NA	NA	NA	NA	NA	NA	NA	NA
Hordeum vulgare	HORVU2Hr1G098100.1	CNL	partial	HORVU2Hr1G098100.1:78	HORVU2Hr1G098100.1:401	EDIDSRRSLVAVCGMGGVGKTTLVTSVYKEVAASRHFDCAAWVSVSKNFTTDDLLRKIAKELHRDVRAGMPDIDEMDYRSLVEALRGHLAKKRYLLLLDDVWDADAWYEIRNALVDDGQGSKIIITTRSQNVASLAASTRIIMLEPLPKQEAWSLFCNTTFREDANQECPHHLEQWAFKILDRCCGLPLAIVSVGNLLALKSRTEFAWKNV	no	1,6,4,5,10,3,12,2,8,7	NA	2.2e-56	NA	NA	NA	NA	NA	NA	NA	NA	NA	NA	NA	NA
Hordeum vulgare	HORVU2Hr1G098100.2	CNL	partial	HORVU2Hr1G098100.2:78	HORVU2Hr1G098100.2:746	EDIDSRRSLVAVCGMGGVGKTTLVTSVYKEVAASRHFDCAAWVSVSKNFTTDDLLRKIAKELHRDVRAGMPDIDEMDYRSLVEALRGHLAKKRYLLLLDDVWDADAWYEIRNALVDDGQGSKIIITTRSQNVASLAASTRIIMLEPLPKQEAWSLFCNTTFREDANQECPHHLEQWAFKILDRCCGLPLAIVSVGNLLALKSRTEFAWKNV	no	1,6,4,5,10,3,12,2,8,7,9,9,9,11,11,11	yes	8.7e-56	0.00033	NA	NA	NA	55	377	381	TRUE	no	NA	NA	NA
Hordeum vulgare	HORVU2Hr1G098100.3	CNL	partial	HORVU2Hr1G098100.3:78	HORVU2Hr1G098100.3:703	EDIDSRRSLVAVCGMGGVGKTTLVTSVYKEVAASRHFDCAAWVSVSKNFTTDDLLRKIAKELHRDVRAGMPDIDEMDYRSLVEALRGHLAKKRYLLLLDDVWDADAWYEIRNALVDDGQGSKIIITTRSQNVASLAASTRIIMLEPLPKQEAWSLFCNTTFREDANQECPHHLEQWAFKILDRCCGLPLAIVSVGNLLALKSRTEFAWKNV	no	1,6,4,5,10,3,12,2,8,7,9,9,11,11,11	yes	7.8e-56	0.0013	NA	NA	NA	55	368	347	TRUE	no	NA	NA	NA
Hordeum vulgare	HORVU2Hr1G098100.4	CNL	partial	HORVU2Hr1G098100.4:75	HORVU2Hr1G098100.4:398	EDIDSRRSLVAVCGMGGVGKTTLVTSVYKEVAASRHFDCAAWVSVSKNFTTDDLLRKIAKELHRDVRAGMPDIDEMDYRSLVEALRGHLAKKRYLLLLDDVWDADAWYEIRNALVDDGQGSKIIITTRSQNVASLAASTRIIMLEPLPKQEAWSLFCNTTFREDANQECPHHLEQWAFKILDRCCGLPLAIVSVGNLLALKSRTEFAWKNV	no	1,6,4,5,10,3,12,2,8,7	NA	2.1e-56	NA	NA	NA	NA	NA	NA	NA	NA	NA	NA	NA	NA
Hordeum vulgare	HORVU2Hr1G098450.11	NA	partial	HORVU2Hr1G098450.11:168	HORVU2Hr1G098450.11:376	NA	no	11,11,9,11,12	NA	NA	1.4e-09	NA	0.21	NA	NA	NA	NA	NA	NA	NA	NA	NA
Hordeum vulgare	HORVU2Hr1G098450.15	NA	partial	HORVU2Hr1G098450.15:1	HORVU2Hr1G098450.15:89	NA	no	11,9,11,12	NA	NA	1.9e-07	NA	NA	NA	NA	NA	NA	NA	NA	NA	NA	NA
Hordeum vulgare	HORVU2Hr1G098450.16	NA	partial	HORVU2Hr1G098450.16:1	HORVU2Hr1G098450.16:89	NA	no	11,9,11,12	NA	NA	1.1e-06	NA	NA	NA	NA	NA	NA	NA	NA	NA	NA	NA
Hordeum vulgare	HORVU2Hr1G098450.2	NA	partial	HORVU2Hr1G098450.2:167	HORVU2Hr1G098450.2:375	NA	no	11,11,9,11,12	NA	NA	1.3e-12	NA	0.23	NA	NA	NA	NA	NA	NA	NA	NA	NA
Hordeum vulgare	HORVU2Hr1G101700.1	CNL	complete	HORVU2Hr1G101700.1:78	HORVU2Hr1G101700.1:901	TSNDVCFSVIGIHGVSGSGKSTLAQFVCAREENNKEGHFDLVMWVHVSQNFSVSDIFKELYEAASQPKGSSEPNIPCPIFHNLNTLEKQLGMKLDGKRFLLVLDDVWSSEDCGGQNLPGLLTPLKVGKRGSKILVTTRSKHALTDLCVGVRYTAMSITEVDETAFFELFMHYALEYGQDRSLFKTIGEEIAEKLKGSPLAARTVGGNLRQQ	no	16,1,6,4,5,10,3,2,8,7,19,19,9,11	yes	2.6e-34	NA	NA	NA	NA	194	402	363	no	no	NA	NA	NA
Hordeum vulgare	HORVU2Hr1G101700.2	CNL	partial	HORVU2Hr1G101700.2:89	HORVU2Hr1G101700.2:764	TSNDVCFSVIGIHGVSGSGKSTLAQFVCAREENNKEGHFDLVMWVHVSQNFSVSDIFKELYEAASQPKGSSEPNIPCPIFHNLNTLEKQLGMKLDGKRFLLVLDDVWSSEDCGGQNLPGLLTPLKVGKRGSKILVTTRSKHALTDLCVGVRYTAMSITEVDETAFFELFMHYALEYGQDRSLFKTIGEEIAEKLKGSPLAARTVGGNLRQQ	no	1,6,4,5,10,3,2,8,7,19,19,9,11	yes	2e-34	NA	NA	NA	NA	NA	NA	NA	NA	NA	NA	NA	NA
Hordeum vulgare	HORVU2Hr1G101700.3	CNL	complete	HORVU2Hr1G101700.3:78	HORVU2Hr1G101700.3:901	TSNDVCFSVIGIHGVSGSGKSTLAQFVCAREENNKEGHFDLVMWVHVSQNFSVSDIFKELYEAASQPKGSSEPNIPCPIFHNLNTLEKQLGMKLDGKRFLLVLDDVWSSEDCGGQNLPGLLTPLKVGKRGSKILVTTRSKHALTDLCVGVRYTAMSITEVDETAFFELFMHYALEYGQDRSLFKTIGEEIAEKLKGSPLAARTVGGNLRQQ	no	16,1,6,4,5,10,3,2,8,7,19,19,9,11	yes	2.6e-34	NA	NA	NA	NA	194	402	363	no	no	NA	NA	NA
Hordeum vulgare	HORVU2Hr1G101700.4	CNL	partial	HORVU2Hr1G101700.4:89	HORVU2Hr1G101700.4:764	TSNDVCFSVIGIHGVSGSGKSTLAQFVCAREENNKEGHFDLVMWVHVSQNFSVSDIFKELYEAASQPKGSSEPNIPCPIFHNLNTLEKQLGMKLDGKRFLLVLDDVWSSEDCGGQNLPGLLTPLKVGKRGSKILVTTRSKHALTDLCVGVRYTAMSITEVDETAFFELFMHYALEYGQDRSLFKTIGEEIAEKLKGSPLAARTVGGNLRQQ	no	1,6,4,5,10,3,2,8,7,19,19,9,11	yes	2e-34	NA	NA	NA	NA	NA	NA	NA	NA	NA	NA	NA	NA
Hordeum vulgare	HORVU2Hr1G101700.5	CNL	complete	HORVU2Hr1G101700.5:92	HORVU2Hr1G101700.5:915	TSNDVCFSVIGIHGVSGSGKSTLAQFVCAREENNKEGHFDLVMWVHVSQNFSVSDIFKELYEAASQPKGSSEPNIPCPIFHNLNTLEKQLGMKLDGKRFLLVLDDVWSSEDCGGQNLPGLLTPLKVGKRGSKILVTTRSKHALTDLCVGVRYTAMSITEVDETAFFELFMHYALEYGQDRSLFKTIGEEIAEKLKGSPLAARTVGGNLRQQ	no	16,1,6,4,5,10,3,2,8,7,19,19,9,11	yes	2.4e-34	NA	NA	NA	NA	208	402	317	no	no	yes	NA	NA
Hordeum vulgare	HORVU2Hr1G101700.6	CNL	complete	HORVU2Hr1G101700.6:87	HORVU2Hr1G101700.6:910	TSNDVCFSVIGIHGVSGSGKSTLAQFVCAREENNKEGHFDLVMWVHVSQNFSVSDIFKELYEAASQPKGSSEPNIPCPIFHNLNTLEKQLGMKLDGKRFLLVLDDVWSSEDCGGQNLPGLLTPLKVGKRGSKILVTTRSKHALTDLCVGVRYTAMSITEVDETAFFELFMHYALEYGQDRSLFKTIGEEIAEKLKGSPLAARTVGGNLRQQ	no	16,1,6,4,5,10,3,2,8,7,19,19,9,11	yes	2.6e-34	NA	NA	NA	NA	203	402	364	no	no	NA	NA	NA
Hordeum vulgare	HORVU2Hr1G103460.1	CNL	partial	HORVU2Hr1G103460.1:209	HORVU2Hr1G103460.1:1401	ADKHEGVSVLPIVGIGGVGKTTLTQLVYNDPIVKERFERKWLWVSNNFDEVRLTREMLNFISQESHEGIDNFVKLQEILKVHMEFQSKRFLLILDDVWDTLDDYLWNKLLSPMISTRVKGNVIIVTTRNFSVAERIGTLEQVNLGALENDDFWLLFKSCAFGDENYEEHQTLGIIGHQIAERLMGNPLAAGSTGKLLREQLTVDHWSTILK	no	1,6,4,5,10,3,12,2,8,7,11,11,11,11,11,11,11,11,11,11	yes	1.7e-36	0.0061	NA	NA	NA	185	415	846	no	no	NA	NA	NA
Hordeum vulgare	HORVU2Hr1G103460.10	CNL	partial	HORVU2Hr1G103460.10:59	HORVU2Hr1G103460.10:1251	ADKHEGVSVLPIVGIGGVGKTTLTQLVYNDPIVKERFERKWLWVSNNFDEVRLTREMLNFISQESHEGIDNFVKLQEILKVHMEFQSKRFLLILDDVWDTLDDYLWNKLLSPMISTRVKGNVIIVTTRNFSVAERIGTLEQVNLGALENDDFWLLFKSCAFGDENYEEHQTLGIIGHQIAERLMGNPLAAGSTGKLLREQLTVDHWSTILK	no	1,6,4,5,10,3,12,2,8,7,11,11,11,11,11,11,11,11,11,11	yes	1.5e-36	0.00086	NA	NA	NA	35	415	846	TRUE	no	NA	NA	NA
Hordeum vulgare	HORVU2Hr1G103460.11	CNL	partial	HORVU2Hr1G103460.11:209	HORVU2Hr1G103460.11:1401	ADKHEGVSVLPIVGIGGVGKTTLTQLVYNDPIVKERFERKWLWVSNNFDEVRLTREMLNFISQESHEGIDNFVKLQEILKVHMEFQSKRFLLILDDVWDTLDDYLWNKLLSPMISTRVKGNVIIVTTRNFSVAERIGTLEQVNLGALENDDFWLLFKSCAFGDENYEEHQTLGIIGHQIAERLMGNPLAAGSTGKLLREQLTVDHWSTILK	no	1,6,4,5,10,3,12,2,8,7,11,11,11,11,11,11,11,11,11,11	yes	1.7e-36	0.0061	NA	NA	NA	185	415	846	no	no	NA	NA	NA
Hordeum vulgare	HORVU2Hr1G103460.12	CNL	partial	HORVU2Hr1G103460.12:209	HORVU2Hr1G103460.12:1401	ADKHEGVSVLPIVGIGGVGKTTLTQLVYNDPIVKERFERKWLWVSNNFDEVRLTREMLNFISQESHEGIDNFVKLQEILKVHMEFQSKRFLLILDDVWDTLDDYLWNKLLSPMISTRVKGNVIIVTTRNFSVAERIGTLEQVNLGALENDDFWLLFKSCAFGDENYEEHQTLGIIGHQIAERLMGNPLAAGSTGKLLREQLTVDHWSTILK	no	1,6,4,5,10,3,12,2,8,7,11,11,11,11,11,11,11,11,11,11	yes	1.7e-36	0.0061	NA	NA	NA	185	415	846	no	no	NA	NA	NA
Hordeum vulgare	HORVU2Hr1G103460.13	CNL	partial	HORVU2Hr1G103460.13:59	HORVU2Hr1G103460.13:1251	ADKHEGVSVLPIVGIGGVGKTTLTQLVYNDPIVKERFERKWLWVSNNFDEVRLTREMLNFISQESHEGIDNFVKLQEILKVHMEFQSKRFLLILDDVWDTLDDYLWNKLLSPMISTRVKGNVIIVTTRNFSVAERIGTLEQVNLGALENDDFWLLFKSCAFGDENYEEHQTLGIIGHQIAERLMGNPLAAGSTGKLLREQLTVDHWSTILK	no	1,6,4,5,10,3,12,2,8,7,11,11,11,11,11,11,11,11,11,11	yes	1.5e-36	0.00086	NA	NA	NA	35	415	846	TRUE	no	NA	NA	NA
Hordeum vulgare	HORVU2Hr1G103460.14	CNL	partial	HORVU2Hr1G103460.14:177	HORVU2Hr1G103460.14:1369	ADKHEGVSVLPIVGIGGVGKTTLTQLVYNDPIVKERFERKWLWVSNNFDEVRLTREMLNFISQESHEGIDNFVKLQEILKVHMEFQSKRFLLILDDVWDTLDDYLWNKLLSPMISTRVKGNVIIVTTRNFSVAERIGTLEQVNLGALENDDFWLLFKSCAFGDENYEEHQTLGIIGHQIAERLMGNPLAAGSTGKLLREQLTVDHWSTILK	no	1,6,4,5,10,3,12,2,8,7,11,11,11,11,11,11,11,11,11,11	yes	1.6e-36	0.0056	NA	NA	NA	153	415	846	no	no	NA	NA	NA
Hordeum vulgare	HORVU2Hr1G103460.15	CNL	partial	HORVU2Hr1G103460.15:203	HORVU2Hr1G103460.15:1395	ADKHEGVSVLPIVGIGGVGKTTLTQLVYNDPIVKERFERKWLWVSNNFDEVRLTREMLNFISQESHEGIDNFVKLQEILKVHMEFQSKRFLLILDDVWDTLDDYLWNKLLSPMISTRVKGNVIIVTTRNFSVAERIGTLEQVNLGALENDDFWLLFKSCAFGDENYEEHQTLGIIGHQIAERLMGNPLAAGSTGKLLREQLTVDHWSTILK	no	1,6,4,5,10,3,12,2,8,7,11,11,11,11,11,11,11,11,11,11	yes	1.7e-36	0.0059	NA	NA	NA	179	415	846	no	no	NA	NA	NA
Hordeum vulgare	HORVU2Hr1G103460.16	CNL	partial	HORVU2Hr1G103460.16:209	HORVU2Hr1G103460.16:1401	ADKHEGVSVLPIVGIGGVGKTTLTQLVYNDPIVKERFERKWLWVSNNFDEVRLTREMLNFISQESHEGIDNFVKLQEILKVHMEFQSKRFLLILDDVWDTLDDYLWNKLLSPMISTRVKGNVIIVTTRNFSVAERIGTLEQVNLGALENDDFWLLFKSCAFGDENYEEHQTLGIIGHQIAERLMGNPLAAGSTGKLLREQLTVDHWSTILK	no	1,6,4,5,10,3,12,2,8,7,11,11,11,11,11,11,11,11,11,11	yes	1.7e-36	0.0061	NA	NA	NA	185	415	846	no	no	yes	NA	NA
Hordeum vulgare	HORVU2Hr1G103460.17	CNL	partial	HORVU2Hr1G103460.17:209	HORVU2Hr1G103460.17:1401	ADKHEGVSVLPIVGIGGVGKTTLTQLVYNDPIVKERFERKWLWVSNNFDEVRLTREMLNFISQESHEGIDNFVKLQEILKVHMEFQSKRFLLILDDVWDTLDDYLWNKLLSPMISTRVKGNVIIVTTRNFSVAERIGTLEQVNLGALENDDFWLLFKSCAFGDENYEEHQTLGIIGHQIAERLMGNPLAAGSTGKLLREQLTVDHWSTILK	no	1,6,4,5,10,3,12,2,8,7,11,11,11,11,11,11,11,11,11,11	yes	1.7e-36	0.0061	NA	NA	NA	185	415	846	no	no	NA	NA	NA
Hordeum vulgare	HORVU2Hr1G103460.18	CNL	partial	HORVU2Hr1G103460.18:209	HORVU2Hr1G103460.18:948	ADKHEGVSVLPIVGIGGVGKTTLTQLVYNDPIVKERFERKWLWVSNNFDEVRLTREMLNFISQESHEGIDNFVKLQEILKVHMEFQSKRFLLILDDVWDTLDDYLWNKLLSPMISTRVKGNVIIVTTRNFSVAERIGTLEQVNLGALENDDFWLLFKSCAFGDENYEEHQTLGIIGHQIAERLMGNPLAAGSTGKLLREQLTVDHWSTILK	no	1,6,4,5,10,3,12,2,8,7,11,11,11,11	yes	9.2e-37	NA	NA	NA	NA	NA	NA	NA	NA	NA	NA	NA	NA
Hordeum vulgare	HORVU2Hr1G103460.2	CNL	partial	HORVU2Hr1G103460.2:59	HORVU2Hr1G103460.2:1251	ADKHEGVSVLPIVGIGGVGKTTLTQLVYNDPIVKERFERKWLWVSNNFDEVRLTREMLNFISQESHEGIDNFVKLQEILKVHMEFQSKRFLLILDDVWDTLDDYLWNKLLSPMISTRVKGNVIIVTTRNFSVAERIGTLEQVNLGALENDDFWLLFKSCAFGDENYEEHQTLGIIGHQIAERLMGNPLAAGSTGKLLREQLTVDHWSTILK	no	1,6,4,5,10,3,12,2,8,7,11,11,11,11,11,11,11,11,11,11	yes	1.5e-36	0.00086	NA	NA	NA	35	415	846	TRUE	no	NA	NA	NA
Hordeum vulgare	HORVU2Hr1G103460.3	CNL	partial	HORVU2Hr1G103460.3:209	HORVU2Hr1G103460.3:1401	ADKHEGVSVLPIVGIGGVGKTTLTQLVYNDPIVKERFERKWLWVSNNFDEVRLTREMLNFISQESHEGIDNFVKLQEILKVHMEFQSKRFLLILDDVWDTLDDYLWNKLLSPMISTRVKGNVIIVTTRNFSVAERIGTLEQVNLGALENDDFWLLFKSCAFGDENYEEHQTLGIIGHQIAERLMGNPLAAGSTGKLLREQLTVDHWSTILK	no	1,6,4,5,10,3,12,2,8,7,11,11,11,11,11,11,11,11,11,11	yes	1.7e-36	0.0061	NA	NA	NA	185	415	846	no	no	NA	NA	NA
Hordeum vulgare	HORVU2Hr1G103460.4	CNL	partial	HORVU2Hr1G103460.4:209	HORVU2Hr1G103460.4:1401	ADKHEGVSVLPIVGIGGVGKTTLTQLVYNDPIVKERFERKWLWVSNNFDEVRLTREMLNFISQESHEGIDNFVKLQEILKVHMEFQSKRFLLILDDVWDTLDDYLWNKLLSPMISTRVKGNVIIVTTRNFSVAERIGTLEQVNLGALENDDFWLLFKSCAFGDENYEEHQTLGIIGHQIAERLMGNPLAAGSTGKLLREQLTVDHWSTILK	no	1,6,4,5,10,3,12,2,8,7,11,11,11,11,11,11,11,11,11,11	yes	1.7e-36	0.0061	NA	NA	NA	185	415	846	no	no	NA	NA	NA
Hordeum vulgare	HORVU2Hr1G103460.5	CNL	partial	HORVU2Hr1G103460.5:59	HORVU2Hr1G103460.5:1251	ADKHEGVSVLPIVGIGGVGKTTLTQLVYNDPIVKERFERKWLWVSNNFDEVRLTREMLNFISQESHEGIDNFVKLQEILKVHMEFQSKRFLLILDDVWDTLDDYLWNKLLSPMISTRVKGNVIIVTTRNFSVAERIGTLEQVNLGALENDDFWLLFKSCAFGDENYEEHQTLGIIGHQIAERLMGNPLAAGSTGKLLREQLTVDHWSTILK	no	1,6,4,5,10,3,12,2,8,7,11,11,11,11,11,11,11,11,11,11	yes	1.5e-36	0.00086	NA	NA	NA	35	415	846	TRUE	no	NA	NA	NA
Hordeum vulgare	HORVU2Hr1G103460.6	CNL	partial	HORVU2Hr1G103460.6:209	HORVU2Hr1G103460.6:948	ADKHEGVSVLPIVGIGGVGKTTLTQLVYNDPIVKERFERKWLWVSNNFDEVRLTREMLNFISQESHEGIDNFVKLQEILKVHMEFQSKRFLLILDDVWDTLDDYLWNKLLSPMISTRVKGNVIIVTTRNFSVAERIGTLEQVNLGALENDDFWLLFKSCAFGDENYEEHQTLGIIGHQIAERLMGNPLAAGSTGKLLREQLTVDHWSTILK	no	1,6,4,5,10,3,12,2,8,7,11,11,11,11	yes	9.2e-37	NA	NA	NA	NA	NA	NA	NA	NA	NA	NA	NA	NA
Hordeum vulgare	HORVU2Hr1G103460.7	CNL	partial	HORVU2Hr1G103460.7:209	HORVU2Hr1G103460.7:1401	ADKHEGVSVLPIVGIGGVGKTTLTQLVYNDPIVKERFERKWLWVSNNFDEVRLTREMLNFISQESHEGIDNFVKLQEILKVHMEFQSKRFLLILDDVWDTLDDYLWNKLLSPMISTRVKGNVIIVTTRNFSVAERIGTLEQVNLGALENDDFWLLFKSCAFGDENYEEHQTLGIIGHQIAERLMGNPLAAGSTGKLLREQLTVDHWSTILK	no	1,6,4,5,10,3,12,2,8,7,11,11,11,11,11,11,11,11,11,11	yes	1.7e-36	0.0061	NA	NA	NA	185	415	846	no	no	NA	NA	NA
Hordeum vulgare	HORVU2Hr1G103460.8	CNL	partial	HORVU2Hr1G103460.8:209	HORVU2Hr1G103460.8:1401	ADKHEGVSVLPIVGIGGVGKTTLTQLVYNDPIVKERFERKWLWVSNNFDEVRLTREMLNFISQESHEGIDNFVKLQEILKVHMEFQSKRFLLILDDVWDTLDDYLWNKLLSPMISTRVKGNVIIVTTRNFSVAERIGTLEQVNLGALENDDFWLLFKSCAFGDENYEEHQTLGIIGHQIAERLMGNPLAAGSTGKLLREQLTVDHWSTILK	no	1,6,4,5,10,3,12,2,8,7,11,11,11,11,11,11,11,11,11,11	yes	1.7e-36	0.0061	NA	NA	NA	185	415	846	no	no	NA	NA	NA
Hordeum vulgare	HORVU2Hr1G103460.9	CNL	partial	HORVU2Hr1G103460.9:209	HORVU2Hr1G103460.9:1401	ADKHEGVSVLPIVGIGGVGKTTLTQLVYNDPIVKERFERKWLWVSNNFDEVRLTREMLNFISQESHEGIDNFVKLQEILKVHMEFQSKRFLLILDDVWDTLDDYLWNKLLSPMISTRVKGNVIIVTTRNFSVAERIGTLEQVNLGALENDDFWLLFKSCAFGDENYEEHQTLGIIGHQIAERLMGNPLAAGSTGKLLREQLTVDHWSTILK	no	1,6,4,5,10,3,12,2,8,7,11,11,11,11,11,11,11,11,11,11	yes	1.7e-36	0.0061	NA	NA	NA	185	415	846	no	no	NA	NA	NA
Hordeum vulgare	HORVU2Hr1G106890.1	CNL	complete	HORVU2Hr1G106890.1:73	HORVU2Hr1G106890.1:1470	KYSGKDLTILPIVGPGGIGKTTLVQHIYHSHEVQKHFQVKVWICVSQNFIVSKLTEEIEKALPSIEDEKKGRAEELIEQRLKSKRFLFILDDIWKCESEDWKRLLVPLRKGQTKGNVILVTTRFPAIAEIVKTTNSSIILEGLEHKEFRNFFRACIFGDEKSQNDHDGLLKIGDKIAEKLKGSPLAAKTVGRLLRNHLDAHHWTRVLESRE	no	16,1,6,4,5,3,12,2,8,7,9,19,11,11,11,11,11,11,11	yes	1e-40	NA	NA	NA	NA	305	387	813	no	no	NA	NA	NA
Hordeum vulgare	HORVU2Hr1G106890.10	CNL	partial	HORVU2Hr1G106890.10:109	HORVU2Hr1G106890.10:1248	KYSGKDLTILPIVGPGGIGKTTLVQHIYHSHEVQKHFQVKVWICVSQNFIVSKLTEEIEKALPSIEDEKKGRAEELIEQRLKSKRFLFILDDIWKCESEDWKRLLVPLRKGQTKGNVILVTTRFPAIAEIVKTTNSSIILEGLEHKEFRNFFRACIFGDEKSQNDHDGLLKIGDKIAEKLKGSPLAAKTVGRLLRNHLDAHHWTRVLESRE	no	1,6,4,5,3,12,2,8,7,9,19,11,11,11,11,11,11,11	yes	8e-41	NA	NA	NA	NA	NA	NA	NA	NA	NA	NA	NA	NA
Hordeum vulgare	HORVU2Hr1G106890.2	CNL	complete	HORVU2Hr1G106890.2:73	HORVU2Hr1G106890.2:1470	KYSGKDLTILPIVGPGGIGKTTLVQHIYHSHEVQKHFQVKVWICVSQNFIVSKLTEEIEKALPSIEDEKKGRAEELIEQRLKSKRFLFILDDIWKCESEDWKRLLVPLRKGQTKGNVILVTTRFPAIAEIVKTTNSSIILEGLEHKEFRNFFRACIFGDEKSQNDHDGLLKIGDKIAEKLKGSPLAAKTVGRLLRNHLDAHHWTRVLESRE	no	16,1,6,4,5,3,12,2,8,7,9,19,11,11,11,11,11,11,11	yes	1e-40	NA	NA	NA	NA	305	387	813	no	no	NA	NA	NA
Hordeum vulgare	HORVU2Hr1G106890.4	CNL	complete	HORVU2Hr1G106890.4:141	HORVU2Hr1G106890.4:1538	KYSGKDLTILPIVGPGGIGKTTLVQHIYHSHEVQKHFQVKVWICVSQNFIVSKLTEEIEKALPSIEDEKKGRAEELIEQRLKSKRFLFILDDIWKCESEDWKRLLVPLRKGQTKGNVILVTTRFPAIAEIVKTTNSSIILEGLEHKEFRNFFRACIFGDEKSQNDHDGLLKIGDKIAEKLKGSPLAAKTVGRLLRNHLDAHHWTRVLESRE	no	16,1,6,4,5,3,12,2,8,7,9,19,11,11,11,11,11,11,11	yes	1.1e-40	NA	NA	NA	NA	373	387	813	no	no	yes	NA	NA
Hordeum vulgare	HORVU2Hr1G106890.5	CNL	complete	HORVU2Hr1G106890.5:141	HORVU2Hr1G106890.5:1538	KYSGKDLTILPIVGPGGIGKTTLVQHIYHSHEVQKHFQVKVWICVSQNFIVSKLTEEIEKALPSIEDEKKGRAEELIEQRLKSKRFLFILDDIWKCESEDWKRLLVPLRKGQTKGNVILVTTRFPAIAEIVKTTNSSIILEGLEHKEFRNFFRACIFGDEKSQNDHDGLLKIGDKIAEKLKGSPLAAKTVGRLLRNHLDAHHWTRVLESRE	no	16,1,6,4,5,3,12,2,8,7,9,19,11,11,11,11,11,11,11	yes	1.1e-40	NA	NA	NA	NA	373	387	813	no	no	NA	NA	NA
Hordeum vulgare	HORVU2Hr1G106920.10	CNL	complete	HORVU2Hr1G106920.10:74	HORVU2Hr1G106920.10:1447	KYCGKDLTVLPLVGPGGIGKTTLTQYIHNAQEVQNHFEVVVWTCVSLDFNPNKLLEEIKGKIPNVEGEKEGEVGKVIEQRLKSKRLLLILDDMWKCGDQEDWERWLLPFKKSQTKGSMILVTTRFQALAETVKTTGRYIKLGGLEPQEFRKLFLAYIFGDEDSTEDHTYLLETGDKIIEKLKGSPLAAKTVGRLLRDHLDLHHWKMVLESK	no	16,1,6,4,5,10,3,12,2,7,9,11,11,9,11,11,11	yes	3.6e-38	NA	NA	NA	NA	280	388	815	no	no	NA	NA	NA
Hordeum vulgare	HORVU2Hr1G106920.11	CNL	complete	HORVU2Hr1G106920.11:74	HORVU2Hr1G106920.11:1447	KYCGKDLTVLPLVGPGGIGKTTLTQYIHNAQEVQNHFEVVVWTCVSLDFNPNKLLEEIKGKIPNVEGEKEGEVGKVIEQRLKSKRLLLILDDMWKCGDQEDWERWLLPFKKSQTKGSMILVTTRFQALAETVKTTGRYIKLGGLEPQEFRKLFLAYIFGDEDSTEDHTYLLETGDKIIEKLKGSPLAAKTVGRLLRDHLDLHHWKMVLESK	no	16,1,6,4,5,10,3,12,2,7,9,11,11,9,11,11,11	yes	3.6e-38	NA	NA	NA	NA	280	388	815	no	no	NA	NA	NA
Hordeum vulgare	HORVU2Hr1G106920.13	CNL	complete	HORVU2Hr1G106920.13:74	HORVU2Hr1G106920.13:1176	KYCGKDLTVLPLVGPGGIGKTTLTQYIHNAQEVQNHFEVVVWTCVSLDFNPNKLLEEIKGKIPNVEGEKEGEVGKVIEQRLKSKRLLLILDDMWKCGDQEDWERWLLPFKKSQTKGSMILVTTRFQALAETVKTTGRYIKLGGLEPQEFRKLFLAYIFGDEDSTEDHTYLLETGDKIIEKLKGSPLAAKTVGRLLRDHLDLHHWKMVLESK	no	16,1,6,4,5,10,3,12,2,7,9,11,11,9,11	yes	3.4e-38	NA	NA	NA	NA	280	388	756	no	no	yes	NA	NA
Hordeum vulgare	HORVU2Hr1G106920.15	CNL	complete	HORVU2Hr1G106920.15:74	HORVU2Hr1G106920.15:1447	KYCGKDLTVLPLVGPGGIGKTTLTQYIHNAQEVQNHFEVVVWTCVSLDFNPNKLLEEIKGKIPNVEGEKEGEVGKVIEQRLKSKRLLLILDDMWKCGDQEDWERWLLPFKKSQTKGSMILVTTRFQALAETVKTTGRYIKLGGLEPQEFRKLFLAYIFGDEDSTEDHTYLLETGDKIIEKLKGSPLAAKTVGRLLRDHLDLHHWKMVLESK	no	16,1,6,4,5,10,3,12,2,7,9,11,11,9,11,11,11	yes	3.6e-38	NA	NA	NA	NA	280	388	815	no	no	NA	NA	NA
Hordeum vulgare	HORVU2Hr1G106920.16	CNL	complete	HORVU2Hr1G106920.16:74	HORVU2Hr1G106920.16:1447	KYCGKDLTVLPLVGPGGIGKTTLTQYIHNAQEVQNHFEVVVWTCVSLDFNPNKLLEEIKGKIPNVEGEKEGEVGKVIEQRLKSKRLLLILDDMWKCGDQEDWERWLLPFKKSQTKGSMILVTTRFQALAETVKTTGRYIKLGGLEPQEFRKLFLAYIFGDEDSTEDHTYLLETGDKIIEKLKGSPLAAKTVGRLLRDHLDLHHWKMVLESK	no	16,1,6,4,5,10,3,12,2,7,9,11,11,9,11,11,11	yes	3.6e-38	NA	NA	NA	NA	280	388	815	no	no	NA	NA	NA
Hordeum vulgare	HORVU2Hr1G106920.17	CNL	complete	HORVU2Hr1G106920.17:74	HORVU2Hr1G106920.17:1176	KYCGKDLTVLPLVGPGGIGKTTLTQYIHNAQEVQNHFEVVVWTCVSLDFNPNKLLEEIKGKIPNVEGEKEGEVGKVIEQRLKSKRLLLILDDMWKCGDQEDWERWLLPFKKSQTKGSMILVTTRFQALAETVKTTGRYIKLGGLEPQEFRKLFLAYIFGDEDSTEDHTYLLETGDKIIEKLKGSPLAAKTVGRLLRDHLDLHHWKMVLESK	no	16,1,6,4,5,10,3,12,2,7,9,11,11,9,11	yes	3.2e-38	NA	NA	NA	NA	280	388	695	no	no	NA	NA	NA
Hordeum vulgare	HORVU2Hr1G106920.18	CNL	partial	HORVU2Hr1G106920.18:112	HORVU2Hr1G106920.18:1253	KYCGKDLTVLPLVGPGGIGKTTLTQYIHNAQEVQNHFEVVVWTCVSLDFNPNKLLEEIKGKIPNVEGEKEGEVGKVIEQRLKSKRLLLILDDMWKCGDQEDWERWLLPFKKSQTKGSMILVTTRFQALAETVKTTGRYIKLGGLEPQEFRKLFLAYIFGDEDSTEDHTYLLETGDKIIEKLKGSPLAAKTVGRLLRDHLDLHHWKMVLESK	no	1,6,4,5,10,3,12,2,7,9,11,11,9,11,11,11	yes	2.9e-38	NA	NA	NA	NA	NA	NA	NA	NA	NA	NA	NA	NA
Hordeum vulgare	HORVU2Hr1G106920.3	NA	partial	HORVU2Hr1G106920.3:108	HORVU2Hr1G106920.3:833	NA	no	9,11,11,11,11,11,11,11	yes	NA	0.023	NA	NA	NA	NA	NA	NA	NA	NA	NA	NA	NA
Hordeum vulgare	HORVU2Hr1G106920.4	NA	partial	HORVU2Hr1G106920.4:108	HORVU2Hr1G106920.4:563	NA	no	9,11,11,11,11,11	yes	NA	NA	NA	0.71	NA	NA	NA	NA	NA	NA	NA	NA	NA
Hordeum vulgare	HORVU2Hr1G106920.5	NA	partial	HORVU2Hr1G106920.5:108	HORVU2Hr1G106920.5:563	NA	no	9,11,11,11,11,11	yes	NA	NA	NA	0.71	NA	NA	NA	NA	NA	NA	NA	NA	NA
Hordeum vulgare	HORVU2Hr1G106920.6	NA	partial	HORVU2Hr1G106920.6:109	HORVU2Hr1G106920.6:834	NA	no	9,11,11,11,11,11,11,11	yes	NA	0.023	NA	NA	NA	NA	NA	NA	NA	NA	NA	NA	NA
Hordeum vulgare	HORVU2Hr1G106920.8	CNL	partial	HORVU2Hr1G106920.8:23	HORVU2Hr1G106920.8:1060	NA	no	5,10,3,12,2,7,9,11,11,9,11,11,11	yes	4.3e-14	NA	NA	NA	NA	NA	NA	NA	NA	NA	NA	NA	NA
Hordeum vulgare	HORVU2Hr1G106920.9	CNL	complete	HORVU2Hr1G106920.9:74	HORVU2Hr1G106920.9:1176	KYCGKDLTVLPLVGPGGIGKTTLTQYIHNAQEVQNHFEVVVWTCVSLDFNPNKLLEEIKGKIPNVEGEKEGEVGKVIEQRLKSKRLLLILDDMWKCGDQEDWERWLLPFKKSQTKGSMILVTTRFQALAETVKTTGRYIKLGGLEPQEFRKLFLAYIFGDEDSTEDHTYLLETGDKIIEKLKGSPLAAKTVGRLLRDHLDLHHWKMVLESK	no	16,1,6,4,5,10,3,12,2,7,9,11,11,9,11	yes	3.4e-38	NA	NA	NA	NA	280	388	756	no	no	NA	NA	NA
Hordeum vulgare	HORVU2Hr1G106940.1	CNL	partial	HORVU2Hr1G106940.1:73	HORVU2Hr1G106940.1:635	KYSGENLTILPIVGPGGIGKTTLIQHIYNSQEVKTHFQIKIWICVSQNFIVNKLIEEIEKAIPSVEGEKKGRAEELIEQRLNSKSLLLILDDIWKCESDDWKRLLAPLTKGQAKGNVILVTTRFPAVAEMVKTTDSSIDLEGLEHGEFRKFFRACIFGDEKSQNDHDGLLKIGDRIADKLKGSPLAAKTVGRLLRNHLDVHHWTRVLESRE	TRUE	16,9,1,6,4,5,3,12,2,8,7	yes	7.9e-38	NA	NA	NA	NA	297	385	261	no	no	yes	NA	NA
Hordeum vulgare	HORVU2Hr1G106940.2	CNL	partial	HORVU2Hr1G106940.2:73	HORVU2Hr1G106940.2:635	KYSGENLTILPIVGPGGIGKTTLIQHIYNSQEVKTHFQIKIWICVSQNFIVNKLIEEIEKAIPSVEGEKKGRAEELIEQRLNSKSLLLILDDIWKCESDDWKRLLAPLTKGQAKGNVILVTTRFPAVAEMVKTTDSSIDLEGLEHGEFRKFFRACIFGDEKSQNDHDGLLKIGDRIADKLKGSPLAAKTVGRLLRNHLDVHHWTRVLESRE	TRUE	16,9,1,6,4,5,3,12,2,8,7	yes	7.9e-38	NA	NA	NA	NA	297	385	261	no	no	yes	NA	NA
Hordeum vulgare	HORVU2Hr1G107970.1	CNL	complete	HORVU2Hr1G107970.1:78	HORVU2Hr1G107970.1:861	HTKETENNVITVSGMGGLGKSTLVSNVYECEKIKFPAHAWIVVSQIYTVDALLRKILWKIGYTEKPLSAGMDKMDIYDLKREIEKILENRRYLIVLDDVWEQEVYFKICDAFQNLQGSRIIITTRKDHVAGISSPTRHLELLPLSNPDAFKLFCRRAFYNRKDHTCPKDLETIATSIVEKCHGLPLAIVTIGSMLSSRQNLDVYKQTYNQL	no	16,1,6,4,5,10,3,12,2,8,7,9,9,9,11,11,11	yes	8.6e-50	3.3e-07	NA	NA	NA	174	365	363	no	no	NA	NA	NA
Hordeum vulgare	HORVU2Hr1G107970.2	CNL	complete	HORVU2Hr1G107970.2:78	HORVU2Hr1G107970.2:861	HTKETENNVITVSGMGGLGKSTLVSNVYECEKIKFPAHAWIVVSQIYTVDALLRKILWKIGYTEKPLSAGMDKMDIYDLKREIEKILENRRYLIVLDDVWEQEVYFKICDAFQNLQGSRIIITTRKDHVAGISSPTRHLELLPLSNPDAFKLFCRRAFYNRKDHTCPKDLETIATSIVEKCHGLPLAIVTIGSMLSSRQNLDVYKQTYNQL	no	16,1,6,4,5,10,3,12,2,8,7,9,9,9,11,11,11	yes	8.6e-50	3.3e-07	NA	NA	NA	174	365	363	no	no	NA	NA	NA
Hordeum vulgare	HORVU2Hr1G107970.3	CNL	complete	HORVU2Hr1G107970.3:78	HORVU2Hr1G107970.3:861	HTKETENNVITVSGMGGLGKSTLVSNVYECEKIKFPAHAWIVVSQIYTVDALLRKILWKIGYTEKPLSAGMDKMDIYDLKREIEKILENRRYLIVLDDVWEQEVYFKICDAFQNLQGSRIIITTRKDHVAGISSPTRHLELLPLSNPDAFKLFCRRAFYNRKDHTCPKDLETIATSIVEKCHGLPLAIVTIGSMLSSRQNLDVYKQTYNQL	no	16,1,6,4,5,10,3,12,2,8,7,9,9,9,11,11,11	yes	8.6e-50	3.3e-07	NA	NA	NA	174	365	363	no	no	NA	NA	NA
Hordeum vulgare	HORVU2Hr1G107970.4	CNL	complete	HORVU2Hr1G107970.4:28	HORVU2Hr1G107970.4:811	HTKETENNVITVSGMGGLGKSTLVSNVYECEKIKFPAHAWIVVSQIYTVDALLRKILWKIGYTEKPLSAGMDKMDIYDLKREIEKILENRRYLIVLDDVWEQEVYFKICDAFQNLQGSRIIITTRKDHVAGISSPTRHLELLPLSNPDAFKLFCRRAFYNRKDHTCPKDLETIATSIVEKCHGLPLAIVTIGSMLSSRQNLDVYKQTYNQL	no	16,1,6,4,5,10,3,12,2,8,7,9,9,9,11,11,11	yes	8.5e-50	2.9e-07	NA	NA	NA	124	365	363	no	no	yes	NA	NA
Hordeum vulgare	HORVU2Hr1G107970.5	CNL	complete	HORVU2Hr1G107970.5:78	HORVU2Hr1G107970.5:861	HTKETENNVITVSGMGGLGKSTLVSNVYECEKIKFPAHAWIVVSQIYTVDALLRKILWKIGYTEKPLSAGMDKMDIYDLKREIEKILENRRYLIVLDDVWEQEVYFKICDAFQNLQGSRIIITTRKDHVAGISSPTRHLELLPLSNPDAFKLFCRRAFYNRKDHTCPKDLETIATSIVEKCHGLPLAIVTIGSMLSSRQNLDVYKQTYNQL	no	16,1,6,4,5,10,3,12,2,8,7,9,9,9,11,11,11	yes	8.6e-50	3.3e-07	NA	NA	NA	174	365	363	no	no	NA	NA	NA
Hordeum vulgare	HORVU2Hr1G107970.6	CNL	complete	HORVU2Hr1G107970.6:78	HORVU2Hr1G107970.6:861	HTKETENNVITVSGMGGLGKSTLVSNVYECEKIKFPAHAWIVVSQIYTVDALLRKILWKIGYTEKPLSAGMDKMDIYDLKREIEKILENRRYLIVLDDVWEQEVYFKICDAFQNLQGSRIIITTRKDHVAGISSPTRHLELLPLSNPDAFKLFCRRAFYNRKDHTCPKDLETIATSIVEKCHGLPLAIVTIGSMLSSRQNLDVYKQTYNQL	no	16,1,6,4,5,10,3,12,2,8,7,9,9,9,11,11,11	yes	8.6e-50	3.3e-07	NA	NA	NA	174	365	363	no	no	NA	NA	NA
Hordeum vulgare	HORVU2Hr1G107970.7	CNL	partial	HORVU2Hr1G107970.7:78	HORVU2Hr1G107970.7:812	HTKETENNVITVSGMGGLGKSTLVSNVYECEKIKFPAHAWIVVSQIYTVDALLRKILWKIGYTEKPLSAGMDKMDIYDLKREIEKILENRRYLIVLDDVWEQEVYFKICDAFQNLQGSRIIITTRKDHVAGISSPTRHLELLPLSNPDAFKLFCRRAFYNRKDHTCPKDLETIATSIVEKCHGLPLAIVTIGSMFLFPEDYPMSRDSLVRL	no	16,1,6,4,5,10,2,8,7,9,9,9,11,11,11	yes	6.4e-45	2.8e-07	NA	NA	NA	174	316	363	no	no	yes	NA	NA
Hordeum vulgare	HORVU2Hr1G107970.8	CNL	partial	HORVU2Hr1G107970.8:81	HORVU2Hr1G107970.8:713	HTKETENNVITVSGMGGLGKSTLVSNVYECEKIKFPAHAWIVVSQIYTVDALLRKILWKIGYTEKPLSAGMDKMDIYDLKREIEKILENRRYLIVLDDVWEQEVYFKICDAFQNLQGSRIIITTRKDHVAGISSPTRHLELLPLSNPDAFKLFCRRAFYNRKDHTCPKDLETIATSIVEKCHGLPLAIVTIGSMLSSRQNLDVYKQTYNQL	no	1,6,4,5,10,3,12,2,8,7,9,9,9,11,11,11	yes	7e-50	2.2e-07	NA	NA	NA	59	365	330	TRUE	no	NA	NA	NA
Hordeum vulgare	HORVU2Hr1G108000.1	CNL	partial	HORVU2Hr1G108000.1:8	HORVU2Hr1G108000.1:665	NEYHHHPVVISVVGKSGVGKTTLVRDVYDKIDKKRFTVHAMESFAPYLTAINIQWQIVQKLSGDGKNCTRSNVDKVFEEKTIGQKYLLVIDGEVSSTDWKNILLSLKISAKGSRIVHITQHKPEEPPNGYPHVIINLESLGQKTAVELFHRRLLHIEVQDKKIHDRHQDIHNITEGLPLGIALLSGLLQTKEFPSEWTNVFDYLMSKQSKR	no	17,16,1,6,10,3,12,2,8,7,9,9	yes	3.7e-22	NA	NA	NA	NA	172	371	364	no	no	NA	NA	NA
Hordeum vulgare	HORVU2Hr1G108000.2	CNL	partial	HORVU2Hr1G108000.2:8	HORVU2Hr1G108000.2:665	NEYHHHPVVISVVGKSGVGKTTLVRDVYDKIDKKRFTVHAMESFAPYLTAINIQWQIVQKLSGDGKNCTRSNVDKVFEEKTIGQKYLLVIDGEVSSTDWKNILLSLKISAKGSRIVHITQHKPEEPPNGYPHVIINLESLGQKTAVELFHRRLLHIEVQDKKIHDRHQDIHNITEGLPLGIALLSGLLQTKEFPSEWTNVFDYLMSKQSKR	no	17,16,1,6,10,3,12,2,8,7,9,9	yes	3.7e-22	NA	NA	NA	NA	172	371	364	no	no	yes	NA	NA
Hordeum vulgare	HORVU2Hr1G108000.3	CNL	partial	HORVU2Hr1G108000.3:104	HORVU2Hr1G108000.3:568	NEYHHHPVVISVVGKSGVGKTTLVRDVYDKIDKKRFTVHAMESFAPYLTAINIQWQIVQKLSGDGKNCTRSNVDKVFEEKTIGQKYLLVIDGEVSSTDWKNILLSLKISAKGSRIVHITQHKPEEPPNGYPHVIINLESLGQKTAVELFHRRLLHIEVQDKKIHDRHQDIHNITEGLPLGIALLSGLLQTKEFPSEWTNVFDYLMSKQSKR	no	1,6,10,3,12,2,8,7,9,9	yes	3e-22	NA	NA	NA	NA	NA	NA	NA	NA	NA	NA	NA	NA
Hordeum vulgare	HORVU2Hr1G108000.5	CNL	partial	HORVU2Hr1G108000.5:8	HORVU2Hr1G108000.5:86	NA	no	17,16	NA	NA	NA	NA	NA	NA	NA	NA	NA	NA	NA	NA	NA	NA
Hordeum vulgare	HORVU2Hr1G108000.6	CNL	partial	HORVU2Hr1G108000.6:8	HORVU2Hr1G108000.6:86	NA	no	17,16	NA	NA	NA	NA	NA	NA	NA	NA	NA	NA	NA	NA	NA	NA
Hordeum vulgare	HORVU2Hr1G108000.7	CNL	partial	HORVU2Hr1G108000.7:8	HORVU2Hr1G108000.7:86	NA	no	17,16	NA	NA	NA	NA	NA	NA	NA	NA	NA	NA	NA	NA	NA	NA
Hordeum vulgare	HORVU2Hr1G111750.1	CNL	partial	HORVU2Hr1G111750.1:19	HORVU2Hr1G111750.1:611	NA	no	4,5,10,3,12,2,8,7,9,9,9,11,11	NA	3.7e-37	0.0025	NA	NA	NA	NA	NA	NA	NA	NA	NA	NA	NA
Hordeum vulgare	HORVU2Hr1G111750.2	CNL	partial	HORVU2Hr1G111750.2:19	HORVU2Hr1G111750.2:611	NA	no	4,5,10,3,12,2,8,7,9,9,9,11,11	NA	3.7e-37	0.0025	NA	NA	NA	NA	NA	NA	NA	NA	NA	NA	NA
Hordeum vulgare	HORVU2Hr1G111750.3	CNL	partial	HORVU2Hr1G111750.3:19	HORVU2Hr1G111750.3:611	NA	no	4,5,10,3,12,2,8,7,9,9,9,11,11	NA	3.7e-37	0.0025	NA	NA	NA	NA	NA	NA	NA	NA	NA	NA	NA
Hordeum vulgare	HORVU2Hr1G111750.4	CNL	partial	HORVU2Hr1G111750.4:19	HORVU2Hr1G111750.4:611	NA	no	4,5,10,3,12,2,8,7,9,9,9,11,11	NA	3.7e-37	0.0025	NA	NA	NA	NA	NA	NA	NA	NA	NA	NA	NA
Hordeum vulgare	HORVU2Hr1G111750.5	CNL	partial	HORVU2Hr1G111750.5:19	HORVU2Hr1G111750.5:611	NA	no	4,5,10,3,12,2,8,7,9,9,9,11,11	NA	3.7e-37	0.0025	NA	NA	NA	NA	NA	NA	NA	NA	NA	NA	NA
Hordeum vulgare	HORVU2Hr1G116370.1	CNL	partial	HORVU2Hr1G116370.1:89	HORVU2Hr1G116370.1:222	QLANQGVPLVAIVGDGGIGKTTLVQMAFNHVNVQVHFDLRMWVGVSSCMNLLKLTREILQLATEGKDYRGVVNFNYLQDLLRSAVAGKRFLLILDDVWDDNGKTNSHNVYQWKELLSPLKNGQQDSRIVVTTRMKMVADMLG	no	1,6,4,5	NA	2.3e-26	NA	NA	NA	NA	NA	NA	NA	NA	NA	NA	NA	NA
Hordeum vulgare	HORVU2Hr1G119780.1	CNL	partial	HORVU2Hr1G119780.1:15	HORVU2Hr1G119780.1:859	NA	no	17,4,12,2,8,7,11,9,9,17	yes	2.3e-05	1.6e-06	NA	NA	NA	192	491	357	no	no	yes	NA	NA
Hordeum vulgare	HORVU2Hr1G119780.10	CNL	partial	HORVU2Hr1G119780.10:290	HORVU2Hr1G119780.10:758	NA	no	4,12,2,8,7,11,9,9,17	yes	1.9e-05	1.1e-06	NA	NA	NA	91	491	357	no	no	NA	NA	NA
Hordeum vulgare	HORVU2Hr1G119780.11	CNL	partial	HORVU2Hr1G119780.11:15	HORVU2Hr1G119780.11:859	NA	no	17,4,12,2,8,7,11,9,9,17	yes	2.3e-05	1.6e-06	NA	NA	NA	192	491	357	no	no	NA	NA	NA
Hordeum vulgare	HORVU2Hr1G119780.12	CNL	partial	HORVU2Hr1G119780.12:290	HORVU2Hr1G119780.12:758	NA	no	4,12,2,8,7,11,9,9,17	yes	1.9e-05	1.1e-06	NA	NA	NA	91	491	357	no	no	NA	NA	NA
Hordeum vulgare	HORVU2Hr1G119780.13	CNL	partial	HORVU2Hr1G119780.13:290	HORVU2Hr1G119780.13:758	NA	no	4,12,2,8,7,11,9,9,17	yes	1.9e-05	1.1e-06	NA	NA	NA	91	491	357	no	no	NA	NA	NA
Hordeum vulgare	HORVU2Hr1G119780.14	CNL	partial	HORVU2Hr1G119780.14:295	HORVU2Hr1G119780.14:763	NA	no	4,12,2,8,7,11,9,9,17	yes	1.9e-05	1.1e-06	NA	NA	NA	96	491	357	no	no	NA	NA	NA
Hordeum vulgare	HORVU2Hr1G119780.15	CNL	partial	HORVU2Hr1G119780.15:290	HORVU2Hr1G119780.15:758	NA	no	4,12,2,8,7,11,9,9,17	yes	1.9e-05	1.1e-06	NA	NA	NA	91	491	357	no	no	NA	NA	NA
Hordeum vulgare	HORVU2Hr1G119780.16	CNL	partial	HORVU2Hr1G119780.16:15	HORVU2Hr1G119780.16:859	NA	no	17,4,12,2,8,7,11,9,9,17	yes	2.3e-05	1.6e-06	NA	NA	NA	192	491	357	no	no	NA	NA	NA
Hordeum vulgare	HORVU2Hr1G119780.17	CNL	partial	HORVU2Hr1G119780.17:290	HORVU2Hr1G119780.17:758	NA	no	4,12,2,8,7,11,9,9,17	yes	1.9e-05	1.1e-06	NA	NA	NA	91	491	357	no	no	NA	NA	NA
Hordeum vulgare	HORVU2Hr1G119780.18	CNL	partial	HORVU2Hr1G119780.18:15	HORVU2Hr1G119780.18:859	NA	no	17,4,12,2,8,7,11,9,9,17	yes	2.3e-05	1.6e-06	NA	NA	NA	192	491	357	no	no	NA	NA	NA
Hordeum vulgare	HORVU2Hr1G119780.19	CNL	partial	HORVU2Hr1G119780.19:15	HORVU2Hr1G119780.19:859	NA	no	17,4,12,2,8,7,11,9,9,17	yes	2.3e-05	1.6e-06	NA	NA	NA	192	491	357	no	no	NA	NA	NA
Hordeum vulgare	HORVU2Hr1G119780.2	CNL	partial	HORVU2Hr1G119780.2:15	HORVU2Hr1G119780.2:859	NA	no	17,4,12,2,8,7,11,9,9,17	yes	2.3e-05	1.6e-06	NA	NA	NA	192	491	357	no	no	NA	NA	NA
Hordeum vulgare	HORVU2Hr1G119780.3	CNL	partial	HORVU2Hr1G119780.3:15	HORVU2Hr1G119780.3:859	NA	no	17,4,12,2,8,7,11,9,9,17	yes	2.3e-05	1.6e-06	NA	NA	NA	192	491	357	no	no	NA	NA	NA
Hordeum vulgare	HORVU2Hr1G119780.4	CNL	partial	HORVU2Hr1G119780.4:290	HORVU2Hr1G119780.4:758	NA	no	4,12,2,8,7,11,9,9,17	yes	1.9e-05	1.1e-06	NA	NA	NA	91	491	357	no	no	NA	NA	NA
Hordeum vulgare	HORVU2Hr1G119780.5	CNL	partial	HORVU2Hr1G119780.5:15	HORVU2Hr1G119780.5:859	NA	no	17,4,12,2,8,7,11,9,9,17	yes	2.3e-05	1.6e-06	NA	NA	NA	192	491	357	no	no	NA	NA	NA
Hordeum vulgare	HORVU2Hr1G119780.6	CNL	partial	HORVU2Hr1G119780.6:15	HORVU2Hr1G119780.6:859	NA	no	17,4,12,2,8,7,11,9,9,17	yes	2.3e-05	1.6e-06	NA	NA	NA	192	491	357	no	no	NA	NA	NA
Hordeum vulgare	HORVU2Hr1G119780.7	CNL	partial	HORVU2Hr1G119780.7:15	HORVU2Hr1G119780.7:859	NA	no	17,4,12,2,8,7,11,9,9,17	yes	2.3e-05	1.6e-06	NA	NA	NA	192	491	357	no	no	NA	NA	NA
Hordeum vulgare	HORVU2Hr1G119780.8	CNL	partial	HORVU2Hr1G119780.8:15	HORVU2Hr1G119780.8:859	NA	no	17,4,12,2,8,7,11,9,9,17	yes	2.3e-05	1.6e-06	NA	NA	NA	192	491	357	no	no	NA	NA	NA
Hordeum vulgare	HORVU2Hr1G119780.9	CNL	partial	HORVU2Hr1G119780.9:290	HORVU2Hr1G119780.9:758	NA	no	4,12,2,8,7,11,9,9,17	yes	1.9e-05	1.1e-06	NA	NA	NA	91	491	357	no	no	NA	NA	NA
Hordeum vulgare	HORVU2Hr1G122810.1	CNL	partial	HORVU2Hr1G122810.1:14	HORVU2Hr1G122810.1:684	SDSEQKLKLVSIVGPGGMGKTTLANAVYQKLEGKFERTAFVSVSLQPNMKNILSSILRQVSSKIKDDEEDNDDKNKRVRRQESQKHYGNTETWSEKEIIDKIRHALEKRRYLILIDDIWDEKPWKLIKCVLAENKLGSKVIMTTRNVDVARSCCSSDKVDGIVHELQPLSNCDSEKLFYYKIFGNYGYPPELKVVSQKILEKCEGWPLGII	no	17,16,1,6,4,5,10,3,12,2,8,7,9	yes	3.1e-44	0.088	NA	NA	NA	181	409	363	no	no	yes	NA	NA
Hordeum vulgare	HORVU2Hr1G122810.2	CNL	partial	HORVU2Hr1G122810.2:46	HORVU2Hr1G122810.2:418	NA	no	4,5,10,3,12,2,8,7,9	NA	7.8e-29	0.024	NA	NA	NA	NA	NA	NA	NA	NA	NA	NA	NA
Hordeum vulgare	HORVU2Hr1G122810.3	CNL	partial	HORVU2Hr1G122810.3:14	HORVU2Hr1G122810.3:684	SDSEQKLKLVSIVGPGGMGKTTLANAVYQKLEGKFERTAFVSVSLQPNMKNILSSILRQVSSKIKDDEEDNDDKNKRVRRQESQKHYGNTETWSEKEIIDKIRHALEKRRYLILIDDIWDEKPWKLIKCVLAENKLGSKVIMTTRNVDVARSCCSSDKVDGIVHELQPLSNCDSEKLFYYKIFGNYGYPPELKVVSQKILEKCEGWPLGII	no	17,16,1,6,4,5,10,3,12,2,8,7,9	yes	3.1e-44	0.088	NA	NA	NA	181	409	363	no	no	NA	NA	NA
Hordeum vulgare	HORVU2Hr1G122810.4	CNL	partial	HORVU2Hr1G122810.4:14	HORVU2Hr1G122810.4:264	SDSEQKLKLVSIVGPGGMGKTTLANAVYQKLEGKFERTAFVSVSLQPNMKNILSSILRQVSSKIKDDEEDNDDKNKRECVVKKAKNIMETLKRGLKRRSSTKSDMLLRKGGTCTYKDYCFYLILPIWLCTSCD	no	17,16,1,6	NA	1.5e-14	NA	NA	NA	NA	NA	NA	NA	NA	NA	NA	NA	NA
Hordeum vulgare	HORVU2Hr1G122810.5	CNL	partial	HORVU2Hr1G122810.5:47	HORVU2Hr1G122810.5:419	NA	no	4,5,10,3,12,2,8,7,9	NA	2.4e-24	0.024	NA	NA	NA	NA	NA	NA	NA	NA	NA	NA	NA
Hordeum vulgare	HORVU2Hr1G122810.6	CNL	partial	HORVU2Hr1G122810.6:36	HORVU2Hr1G122810.6:286	SDSEQKLKLVSIVGPGGMGKTTLANAVYQKLEGKFERTAFVSVSLQPNMKNILSSILRQVSSKIKDDEEDNDDKNKRVRRQESQKHYGNTETWSEKEIIDKIRHALEKRRYMY	no	17,16,1,6	NA	8.5e-15	NA	NA	NA	NA	NA	NA	NA	NA	NA	NA	NA	NA
Hordeum vulgare	HORVU2Hr1G122810.7	CNL	partial	HORVU2Hr1G122810.7:15	HORVU2Hr1G122810.7:265	SDSEQKLKLVSIVGPGGMGKTTLANAVYQKLEGKFERTAFVSVSLQPNMKNILSSILRQVSSKIKDDEEDNDDKNKRVRRQESQKHYGNTETWSEKEIIDKIRHALEKRRYVLDS	no	17,16,1,6	NA	3.5e-15	NA	NA	NA	NA	NA	NA	NA	NA	NA	NA	NA	NA
Hordeum vulgare	HORVU2Hr1G122810.8	CNL	partial	HORVU2Hr1G122810.8:16	HORVU2Hr1G122810.8:259	NA	no	4,5,10,3,12,2,8,7	NA	4.1e-25	NA	NA	NA	NA	NA	NA	NA	NA	NA	NA	NA	NA
Hordeum vulgare	HORVU2Hr1G122810.9	CNL	partial	HORVU2Hr1G122810.9:7	HORVU2Hr1G122810.9:379	NA	no	4,5,10,3,12,2,8,7,9	NA	4.8e-24	0.0035	NA	NA	NA	NA	NA	NA	NA	NA	NA	NA	NA
Hordeum vulgare	HORVU2Hr1G123990.1	CNL	partial	HORVU2Hr1G123990.1:80	HORVU2Hr1G123990.1:549	MNSSLCYSVVGIHGIAGSGKSTLAQFVYAQEEKDKLAEKDGHFDILLWVYLSQKYSIEAIYRQMFEAIEGYDCELNSLDRLQRELKDKLSGKRFFLVLDDVWCNKDVGEQNLPQLLSPFKIGKRGSKILATSRNVDAFFDLGPDVRCATFPISDLDDSMFLELFMYYALGDGNANDGVGSTLWNIGAHIAEKLKRSPLAASTVGGQLRKRK	no	16,1,6,4,5,10,3,12,2,8,7	NA	1.3e-29	NA	NA	NA	NA	NA	NA	NA	NA	NA	NA	NA	NA
Hordeum vulgare	HORVU2Hr1G123990.10	CNL	partial	HORVU2Hr1G123990.10:90	HORVU2Hr1G123990.10:413	MNSSLCYSVVGIHGIAGSGKSTLAQFVYAQEEKDKLAEKDGHFDILLWVYLSQKYSIEAIYRQMFEAIEGYDCELNSLDRLQRELKDKLSGKRFFLVLDDVWCNKDVGEQNLPQLLSPFKIGKRGSKILATSRNVDAFFDLGPDVRCATFPISDLDDSMFLELFMYYALGDGNANDGVGSTLWNIGAHIAEKLKRSPLAASTVGGQLRKRK	no	1,6,4,5,10,3,12,2,8,7	NA	1.1e-29	NA	NA	NA	NA	NA	NA	NA	NA	NA	NA	NA	NA
Hordeum vulgare	HORVU2Hr1G123990.11	CNL	partial	HORVU2Hr1G123990.11:90	HORVU2Hr1G123990.11:413	MNSSLCYSVVGIHGIAGSGKSTLAQFVYAQEEKDKLAEKDGHFDILLWVYLSQKYSIEAIYRQMFEAIEGYDCELNSLDRLQRELKDKLSGKRFFLVLDDVWCNKDVGEQNLPQLLSPFKIGKRGSKILATSRNVDAFFDLGPDVRCATFPISDLDDSMFLELFMYYALGDGNANDGVGSTLWNIGAHIAEKLKRSPLAASTVGGQLRKRK	no	1,6,4,5,10,3,12,2,8,7	NA	1.1e-29	NA	NA	NA	NA	NA	NA	NA	NA	NA	NA	NA	NA
Hordeum vulgare	HORVU2Hr1G123990.12	CNL	partial	HORVU2Hr1G123990.12:80	HORVU2Hr1G123990.12:549	MNSSLCYSVVGIHGIAGSGKSTLAQFVYAQEEKDKLAEKDGHFDILLWVYLSQKYSIEAIYRQMFEAIEGYDCELNSLDRLQRELKDKLSGKRFFLVLDDVWCNKDVGEQNLPQLLSPFKIGKRGSKILATSRNVDAFFDLGPDVRCATFPISDLDDSMFLELFMYYALGDGNANDGVGSTLWNIGAHIAEKLKRSPLAASTVGGQLRKRK	no	16,1,6,4,5,10,3,12,2,8,7	NA	1.3e-29	NA	NA	NA	NA	NA	NA	NA	NA	NA	NA	NA	NA
Hordeum vulgare	HORVU2Hr1G123990.13	CNL	partial	HORVU2Hr1G123990.13:90	HORVU2Hr1G123990.13:413	MNSSLCYSVVGIHGIAGSGKSTLAQFVYAQEEKDKLAEKDGHFDILLWVYLSQKYSIEAIYRQMFEAIEGYDCELNSLDRLQRELKDKLSGKRFFLVLDDVWCNKDVGEQNLPQLLSPFKIGKRGSKILATSRNVDAFFDLGPDVRCATFPISDLDDSMFLELFMYYALGDGNANDGVGSTLWNIGAHIAEKLKRSPLAASTVGGQLRKRK	no	1,6,4,5,10,3,12,2,8,7	NA	1.1e-29	NA	NA	NA	NA	NA	NA	NA	NA	NA	NA	NA	NA
Hordeum vulgare	HORVU2Hr1G123990.15	CNL	partial	HORVU2Hr1G123990.15:90	HORVU2Hr1G123990.15:413	MNSSLCYSVVGIHGIAGSGKSTLAQFVYAQEEKDKLAEKDGHFDILLWVYLSQKYSIEAIYRQMFEAIEGYDCELNSLDRLQRELKDKLSGKRFFLVLDDVWCNKDVGEQNLPQLLSPFKIGKRGSKILATSRNVDAFFDLGPDVRCATFPISDLDDSMFLELFMYYALGDGNANDGVGSTLWNIGAHIAEKLKRSPLAASTVGGQLRKRK	no	1,6,4,5,10,3,12,2,8,7	NA	1.1e-29	NA	NA	NA	NA	NA	NA	NA	NA	NA	NA	NA	NA
Hordeum vulgare	HORVU2Hr1G123990.16	CNL	partial	HORVU2Hr1G123990.16:90	HORVU2Hr1G123990.16:413	MNSSLCYSVVGIHGIAGSGKSTLAQFVYAQEEKDKLAEKDGHFDILLWVYLSQKYSIEAIYRQMFEAIEGYDCELNSLDRLQRELKDKLSGKRFFLVLDDVWCNKDVGEQNLPQLLSPFKIGKRGSKILATSRNVDAFFDLGPDVRCATFPISDLDDSMFLELFMYYALGDGNANDGVGSTLWNIGAHIAEKLKRSPLAASTVGGQLRKRK	no	1,6,4,5,10,3,12,2,8,7	NA	1.1e-29	NA	NA	NA	NA	NA	NA	NA	NA	NA	NA	NA	NA
Hordeum vulgare	HORVU2Hr1G123990.17	CNL	partial	HORVU2Hr1G123990.17:90	HORVU2Hr1G123990.17:413	MNSSLCYSVVGIHGIAGSGKSTLAQFVYAQEEKDKLAEKDGHFDILLWVYLSQKYSIEAIYRQMFEAIEGYDCELNSLDRLQRELKDKLSGKRFFLVLDDVWCNKDVGEQNLPQLLSPFKIGKRGSKILATSRNVDAFFDLGPDVRCATFPISDLDDSMFLELFMYYALGDGNANDGVGSTLWNIGAHIAEKLKRSPLAASTVGGQLRKRK	no	1,6,4,5,10,3,12,2,8,7	NA	1.1e-29	NA	NA	NA	NA	NA	NA	NA	NA	NA	NA	NA	NA
Hordeum vulgare	HORVU2Hr1G123990.18	CNL	partial	HORVU2Hr1G123990.18:90	HORVU2Hr1G123990.18:413	MNSSLCYSVVGIHGIAGSGKSTLAQFVYAQEEKDKLAEKDGHFDILLWVYLSQKYSIEAIYRQMFEAIEGYDCELNSLDRLQRELKDKLSGKRFFLVLDDVWCNKDVGEQNLPQLLSPFKIGKRGSKILATSRNVDAFFDLGPDVRCATFPISDLDDSMFLELFMYYALGDGNANDGVGSTLWNIGAHIAEKLKRSPLAASTVGGQLRKRK	no	1,6,4,5,10,3,12,2,8,7	NA	1.1e-29	NA	NA	NA	NA	NA	NA	NA	NA	NA	NA	NA	NA
Hordeum vulgare	HORVU2Hr1G123990.2	CNL	partial	HORVU2Hr1G123990.2:80	HORVU2Hr1G123990.2:549	MNSSLCYSVVGIHGIAGSGKSTLAQFVYAQEEKDKLAEKDGHFDILLWVYLSQKYSIEAIYRQMFEAIEGYDCELNSLDRLQRELKDKLSGKRFFLVLDDVWCNKDVGEQNLPQLLSPFKIGKRGSKILATSRNVDAFFDLGPDVRCATFPISDLDDSMFLELFMYYALGDGNANDGVGSTLWNIGAHIAEKLKRSPLAASTVGGQLRKRK	no	16,1,6,4,5,10,3,12,2,8,7	NA	1.3e-29	NA	NA	NA	NA	NA	NA	NA	NA	NA	NA	NA	NA
Hordeum vulgare	HORVU2Hr1G123990.3	CNL	partial	HORVU2Hr1G123990.3:90	HORVU2Hr1G123990.3:413	MNSSLCYSVVGIHGIAGSGKSTLAQFVYAQEEKDKLAEKDGHFDILLWVYLSQKYSIEAIYRQMFEAIEGYDCELNSLDRLQRELKDKLSGKRFFLVLDDVWCNKDVGEQNLPQLLSPFKIGKRGSKILATSRNVDAFFDLGPDVRCATFPISDLDDSMFLELFMYYALGDGNANDGVGSTLWNIGAHIAEKLKRSPLAASTVGGQLRKRK	no	1,6,4,5,10,3,12,2,8,7	NA	1.1e-29	NA	NA	NA	NA	NA	NA	NA	NA	NA	NA	NA	NA
Hordeum vulgare	HORVU2Hr1G123990.4	CNL	partial	HORVU2Hr1G123990.4:90	HORVU2Hr1G123990.4:413	MNSSLCYSVVGIHGIAGSGKSTLAQFVYAQEEKDKLAEKDGHFDILLWVYLSQKYSIEAIYRQMFEAIEGYDCELNSLDRLQRELKDKLSGKRFFLVLDDVWCNKDVGEQNLPQLLSPFKIGKRGSKILATSRNVDAFFDLGPDVRCATFPISDLDDSMFLELFMYYALGDGNANDGVGSTLWNIGAHIAEKLKRSPLAASTVGGQLRKRK	no	1,6,4,5,10,3,12,2,8,7	NA	1.1e-29	NA	NA	NA	NA	NA	NA	NA	NA	NA	NA	NA	NA
Hordeum vulgare	HORVU2Hr1G123990.5	CNL	partial	HORVU2Hr1G123990.5:80	HORVU2Hr1G123990.5:549	MNSSLCYSVVGIHGIAGSGKSTLAQFVYAQEEKDKLAEKDGHFDILLWVYLSQKYSIEAIYRQMFEAIEGYDCELNSLDRLQRELKDKLSGKRFFLVLDDVWCNKDVGEQNLPQLLSPFKIGKRGSKILATSRNVDAFFDLGPDVRCATFPISDLDDSMFLELFMYYALGDGNANDGVGSTLWNIGAHIAEKLKRSPLAASTVGGQLRKRK	no	16,1,6,4,5,10,3,12,2,8,7	NA	1.3e-29	NA	NA	NA	NA	NA	NA	NA	NA	NA	NA	NA	NA
Hordeum vulgare	HORVU2Hr1G123990.6	CNL	partial	HORVU2Hr1G123990.6:90	HORVU2Hr1G123990.6:413	MNSSLCYSVVGIHGIAGSGKSTLAQFVYAQEEKDKLAEKDGHFDILLWVYLSQKYSIEAIYRQMFEAIEGYDCELNSLDRLQRELKDKLSGKRFFLVLDDVWCNKDVGEQNLPQLLSPFKIGKRGSKILATSRNVDAFFDLGPDVRCATFPISDLDDSMFLELFMYYALGDGNANDGVGSTLWNIGAHIAEKLKRSPLAASTVGGQLRKRK	no	1,6,4,5,10,3,12,2,8,7	NA	1.1e-29	NA	NA	NA	NA	NA	NA	NA	NA	NA	NA	NA	NA
Hordeum vulgare	HORVU2Hr1G123990.7	CNL	partial	HORVU2Hr1G123990.7:90	HORVU2Hr1G123990.7:413	MNSSLCYSVVGIHGIAGSGKSTLAQFVYAQEEKDKLAEKDGHFDILLWVYLSQKYSIEAIYRQMFEAIEGYDCELNSLDRLQRELKDKLSGKRFFLVLDDVWCNKDVGEQNLPQLLSPFKIGKRGSKILATSRNVDAFFDLGPDVRCATFPISDLDDSMFLELFMYYALGDGNANDGVGSTLWNIGAHIAEKLKRSPLAASTVGGQLRKRK	no	1,6,4,5,10,3,12,2,8,7	NA	1.1e-29	NA	NA	NA	NA	NA	NA	NA	NA	NA	NA	NA	NA
Hordeum vulgare	HORVU2Hr1G123990.8	CNL	partial	HORVU2Hr1G123990.8:80	HORVU2Hr1G123990.8:549	MNSSLCYSVVGIHGIAGSGKSTLAQFVYAQEEKDKLAEKDGHFDILLWVYLSQKYSIEAIYRQMFEAIEGYDCELNSLDRLQRELKDKLSGKRFFLVLDDVWCNKDVGEQNLPQLLSPFKIGKRGSKILATSRNVDAFFDLGPDVRCATFPISDLDDSMFLELFMYYALGDGNANDGVGSTLWNIGAHIAEKLKRSPLAASTVGGQLRKRK	no	16,1,6,4,5,10,3,12,2,8,7	NA	1.3e-29	NA	NA	NA	NA	NA	NA	NA	NA	NA	NA	NA	NA
Hordeum vulgare	HORVU2Hr1G123990.9	CNL	partial	HORVU2Hr1G123990.9:80	HORVU2Hr1G123990.9:549	MNSSLCYSVVGIHGIAGSGKSTLAQFVYAQEEKDKLAEKDGHFDILLWVYLSQKYSIEAIYRQMFEAIEGYDCELNSLDRLQRELKDKLSGKRFFLVLDDVWCNKDVGEQNLPQLLSPFKIGKRGSKILATSRNVDAFFDLGPDVRCATFPISDLDDSMFLELFMYYALGDGNANDGVGSTLWNIGAHIAEKLKRSPLAASTVGGQLRKRK	no	16,1,6,4,5,10,3,12,2,8,7	NA	1.3e-29	NA	NA	NA	NA	NA	NA	NA	NA	NA	NA	NA	NA
Hordeum vulgare	HORVU2Hr1G126380.1	CNL	complete	HORVU2Hr1G126380.1:15	HORVU2Hr1G126380.1:1126	ENTVQDLVVLAMHGIGGLGKTTLAKMIYNNNTKFEEYVRVWIYVSETFDLNKIGNSLISQLSQNESTYTETQMIHRSLAQLLANKKILIVLDDLWAEDDSQLDSLVAMLKVGKGSKVVVIATTRNEEIARKISTIPSHELASLTDEMCWTIIKQKSGFESRDDKEQLKDIGEAIAAKCGGVALAAQSIGPILETMTYNQWKKVKDSDIWKE	no	17,16,1,6,4,5,3,2,8,7,9,9,9,11,11,11,11,11,11,11,11,19,11	yes	1e-40	1.2e-29	NA	7.8e-16	NA	157	394	616	no	no	yes	NA	NA
Hordeum vulgare	HORVU2Hr1G126380.2	NA	partial	HORVU2Hr1G126380.2:67	HORVU2Hr1G126380.2:640	NA	no	9,9,9,11,11,11,11,11,11,11,11,19,11	NA	NA	1e-31	NA	6.4e-18	NA	NA	NA	NA	NA	NA	NA	NA	NA
Hordeum vulgare	HORVU2Hr1G126380.3	NA	partial	HORVU2Hr1G126380.3:19	HORVU2Hr1G126380.3:695	NA	no	8,7,9,9,9,11,11,11,11,11,11,11,11,19,11	NA	NA	2.2e-31	NA	3e-17	NA	NA	NA	NA	NA	NA	NA	NA	NA
Hordeum vulgare	HORVU2Hr1G126380.4	NA	partial	HORVU2Hr1G126380.4:14	HORVU2Hr1G126380.4:655	NA	no	7,9,9,9,11,11,11,11,11,11,11,11,19,11	NA	NA	2e-31	NA	3e-17	NA	NA	NA	NA	NA	NA	NA	NA	NA
Hordeum vulgare	HORVU2Hr1G126380.5	CNL	partial	HORVU2Hr1G126380.5:81	HORVU2Hr1G126380.5:474	ENTVQDLVVLAMHGIGGLGKTTLAKMIYNNNTKFEEYVRVWIYVSETFDLNKIGNSLISQLSQNESTYTETQMIHRSLAQLLANKKILIVLDDLWAEDDSQLDSLVAMLKVGKGSKVVVIATTRNEEIARKISTIPSHELASLTDEMCWTIIKQKSGFESRDDKEQLKDIGEAIAAKCGGVALAAQSIGPILETMTYNQWKKVKDSDIWKE	no	1,6,4,5,3,2,8,7,9	NA	2.4e-41	0.00019	NA	NA	NA	NA	NA	NA	NA	NA	NA	NA	NA
Hordeum vulgare	HORVU2Hr1G126380.7	CNL	partial	HORVU2Hr1G126380.7:15	HORVU2Hr1G126380.7:90	NA	no	17,16	NA	NA	NA	NA	NA	NA	NA	NA	NA	NA	NA	NA	NA	NA
Hordeum vulgare	HORVU2Hr1G126440.1	CNL	complete	HORVU2Hr1G126440.1:40	HORVU2Hr1G126440.1:1072	EIMIEELIVLAIHGIGGLGKTTLAKMIYNNKTKFEDYFRVWIYVSEKFDLNKIGNSLISQLSENESTYTEKQMIHRSLAQLFTNKKILIILDDLWAEDDSQLDSLVAMLKVGQGSKVVVIATTRNEEIARKISTIPSYELASLTNEMCWTIIKQKSGFESRDDKEQLNDVGEAIAAKCGGVALAAQSIGSILETMTSNQWKKVRDSDIWKV	no	16,1,6,4,5,3,2,8,7,9,9,9,11,11,11,11,9,12,9,11,11	yes	1.1e-37	9.1e-27	NA	8.4e-12	NA	135	397	556	no	no	yes	NA	NA
Hordeum vulgare	HORVU2Hr1G126440.3	CNL	partial	HORVU2Hr1G126440.3:95	HORVU2Hr1G126440.3:910	EIMIEELIVLAIHGIGGLGKTTLAKMIYNNKTKFEDYFRVWIYVSEKFDLNKIGNSLISQLSENESTYTEKQMIHRSLAQLFTNKKILIILDDLWAEDDSQLDSLVAMLKVGQGSKVVVIATTRNEEIARKISTIPSYELASLTNEMCWTIIKQKSGFESRDDKEQLNDVGEAIAAKCGGVALAAQSIGSILETMTSNQWKKVRDSDIWKV	no	1,6,4,5,3,2,8,7,9,9,9,11,11,11,11,9,12	yes	8.9e-38	1.8e-22	NA	1.3e-10	NA	70	397	474	no	no	NA	NA	NA
Hordeum vulgare	HORVU2Hr1G126470.1	NA	partial	HORVU2Hr1G126470.1:67	HORVU2Hr1G126470.1:668	NA	no	9,9,9,11,11,11,11,11,11,11,19,11,11	NA	NA	5.3e-37	0.00088	2.2e-18	NA	NA	NA	NA	NA	NA	NA	NA	NA
Hordeum vulgare	HORVU2Hr1G126510.1	CNL	complete	HORVU2Hr1G126510.1:50	HORVU2Hr1G126510.1:1217	ENTVQDLVVLAMHGIGGLGKTTLAKMIYNNNTKFEEYVRVWIYVSETFDLNKIGNSLISQLSQNESTYTETQMIHRSLAQLLANKKILIVLDDLWAEDDSQLDSLVAMLKVGKGSKVVVIATTRNEEIARKISTIPSHELASLTDEMCWTIIKQKSGFESRDDKEQLKDIGEAIAAKCGGVALAAQSIGPILETMPYNQWKKVRDSDIWKV	no	17,16,1,6,4,5,3,2,8,7,9,9,9,11,11,11,11,11,11,11,11,19,11,11	yes	1e-39	3.3e-39	0.0026	5.9e-18	NA	196	394	652	no	no	yes	NA	NA
Hordeum vulgare	HORVU2Hr1G126510.2	CNL	complete	HORVU2Hr1G126510.2:50	HORVU2Hr1G126510.2:1217	ENTVQDLVVLAMHGIGGLGKTTLAKMIYNNNTKFEEYVRVWIYVSETFDLNKIGNSLISQLSQNESTYTETQMIHRSLAQLLANKKILIVLDDLWAEDDSQLDSLVAMLKVGKGSKVVVIATTRNEEIARKISTIPSHELASLTDEMCWTIIKQKSGFESRDDKEQLKDIGEAIAAKCGGVALAAQSIGPILETMPYNQWKKVRDSDIWKV	no	17,16,1,6,4,5,3,2,8,7,9,9,9,11,11,11,11,11,11,11,11,19,11,11	yes	1e-39	3.3e-39	0.0026	5.9e-18	NA	196	394	652	no	no	NA	NA	NA
Hordeum vulgare	HORVU2Hr1G126510.3	CNL	partial	HORVU2Hr1G126510.3:31	HORVU2Hr1G126510.3:819	NA	no	17,16,7,9,9,9,11,11,11,11,11,11,11,11,19,11,11	yes	NA	3.2e-40	0.0011	2.1e-20	NA	111	81	652	no	no	NA	NA	NA
Hordeum vulgare	HORVU2Hr1G126510.4	CNL	partial	HORVU2Hr1G126510.4:15	HORVU2Hr1G126510.4:90	NA	no	17,16	NA	NA	NA	NA	NA	NA	NA	NA	NA	NA	NA	NA	NA	NA
Hordeum vulgare	HORVU2Hr1G126510.6	CNL	partial	HORVU2Hr1G126510.6:81	HORVU2Hr1G126510.6:1078	ENTVQDLVVLAMHGIGGLGKTTLAKMIYNNNTKFEEYVRVWIYVSETFDLNKIGNSLISQLSQNESTYTETQMIHRSLAQLLANKKILIVLDDLWAEDDSQLDSLVAMLKVGKGSKVVVIATTRNEEIARKISTIPSHELASLTDEMCWTIIKQKSGFESRDDKEQLKDIGEAIAAKCGGVALAAQSIGPILETMPYNQWKKVRDSDIWKV	no	1,6,4,5,3,2,8,7,9,9,9,11,11,11,11,11,11,11,11,19,11,11	yes	8.9e-40	1.3e-39	0.0038	1.3e-18	NA	57	394	652	TRUE	no	NA	NA	NA
Hordeum vulgare	HORVU2Hr1G127490.1	CNL	complete	HORVU2Hr1G127490.1:70	HORVU2Hr1G127490.1:987	EHDSSAVRVVAIVGQGGIGKSTLAKKILASEAIKEEFKIKIWLSVTQQFTPMGLLRAAISHAGGNHGDEKDETILVNVLTDTLSKNKFLLVMDDVWDKEAWENVLRTPVLNAADTQPGSRVLVTSRKAGVVRSMGASILRVNTLNDEDAWCLLKKQLPQPQVSNSSDFDELKDIGMKIVKKCDGLPLAIKVMGGLLSKRDPKEHDWEIVLH	no	16,1,6,4,5,10,3,2,8,7,9,11,9,19,11,9,11,11	yes	3.3e-44	4.9e-08	NA	NA	NA	189	387	459	no	no	yes	NA	NA
Hordeum vulgare	HORVU2Hr1G127490.2	CNL	complete	HORVU2Hr1G127490.2:70	HORVU2Hr1G127490.2:987	EHDSSAVRVVAIVGQGGIGKSTLAKKILASEAIKEEFKIKIWLSVTQQFTPMGLLRAAISHAGGNHGDEKDETILVNVLTDTLSKNKFLLVMDDVWDKEAWENVLRTPVLNAADTQPGSRVLVTSRKAGVVRSMGASILRVNTLNDEDAWCLLKKQLPQPQVGVERDFDELKDIGMKIVKKCDGLPLAIKVMGGLLSKRDPKEHDWEIVLH	no	16,1,6,4,5,10,3,2,8,7,9,11,9,19,11,9,11,11	yes	7.7e-44	4.9e-08	NA	NA	NA	189	387	459	no	no	yes	NA	NA
Hordeum vulgare	HORVU2Hr1G127490.3	CNL	complete	HORVU2Hr1G127490.3:70	HORVU2Hr1G127490.3:987	EHDSSAVRVVAIVGQGGIGKSTLAKKILASEAIKEEFKIKIWLSVTQQFTPMGLLRAAISHAGGNHGDEKDETILVNVLTDTLSKNKFLLVMDDVWDKEAWENVLRTPVLNAADTQPGSRVLVTSRKAGVVRSMGASILRVNTLNDEDAWCLLKKQLPQPQVGVERDFDELKDIGMKIVKKCDGLPLAIKVMGGLLSKRDPKEHDWEIVLH	no	16,1,6,4,5,10,3,2,8,7,9,11,9,19,11,9,11,11	yes	7.7e-44	4.9e-08	NA	NA	NA	189	387	459	no	no	NA	NA	NA
Hordeum vulgare	HORVU2Hr1G127490.4	CNL	complete	HORVU2Hr1G127490.4:70	HORVU2Hr1G127490.4:988	EHDSSAVRVVAIVGQGGIGKSTLAKKILASEAIKEEFKIKIWLSVTQQFTPMGLLRAAISHAGGNHGDEKDETILVNVLTDTLSKNKFLLVMDDVWDKEAWENVLRTPVLNAADTQPGSRVLVTSRKAGVVRSMGASILRVNTLNDEDAWCLLKKQLPQPQVVGVERDFDELKDIGMKIVKKCDGLPLAIKVMGGLLSKRDPKEHDWEIVL	no	16,1,6,4,5,10,3,2,8,7,9,11,9,19,11,9,11,11	yes	4e-43	4.9e-08	NA	NA	NA	189	388	459	no	no	yes	NA	NA
Hordeum vulgare	HORVU2Hr1G127490.5	CNL	partial	HORVU2Hr1G127490.5:20	HORVU2Hr1G127490.5:617	NA	no	3,2,8,7,9,11,9,19,11,9,11,11	NA	9.6e-08	6.8e-09	NA	NA	NA	NA	NA	NA	NA	NA	NA	NA	NA
Hordeum vulgare	HORVU3Hr1G001230.1	CNL	partial	HORVU3Hr1G001230.1:44	HORVU3Hr1G001230.1:426	NA	no	4,5,3,12,2,8,7,9,9	NA	2.2e-20	0.35	NA	NA	NA	NA	NA	NA	NA	NA	NA	NA	NA
Hordeum vulgare	HORVU3Hr1G001230.2	CNL	partial	HORVU3Hr1G001230.2:53	HORVU3Hr1G001230.2:348	NA	no	3,12,2,8,7,9,9	NA	3.7e-07	0.22	NA	NA	NA	NA	NA	NA	NA	NA	NA	NA	NA
Hordeum vulgare	HORVU3Hr1G001230.3	CNL	partial	HORVU3Hr1G001230.3:16	HORVU3Hr1G001230.3:652	ASEGRELKVISIVGCRGVGKTSLATAVYDDCRADYDCVAWVVASACRDLEDLLTKLLKESQRTAKPTSTPAQGSISDTQQTSLWNFLSDKRYFVVIDDVDRLEVCQAIKREFPKDGHSSRIIVTTSMHSVAAECSWGSYVYTMQCLDKDESEQVFWESVGQENKTPALRRASEGIITKCGGLPLALISVANYLRRQGRTENQVAGGLTTEH	no	17,16,1,6,4,5,3,12,2,8,7,9,9	yes	1e-33	0.43	NA	NA	NA	166	396	389	no	no	yes	NA	NA
Hordeum vulgare	HORVU3Hr1G001230.4	CNL	partial	HORVU3Hr1G001230.4:53	HORVU3Hr1G001230.4:348	NA	no	3,12,2,8,7,9,9	NA	3.7e-07	0.22	NA	NA	NA	NA	NA	NA	NA	NA	NA	NA	NA
Hordeum vulgare	HORVU3Hr1G001230.5	CNL	partial	HORVU3Hr1G001230.5:16	HORVU3Hr1G001230.5:241	ASEGRELKVISIVGCRGVGKTSLATAVYDDCRADYDCVAWVVASACRDLEDLLTKLLKESQRTAKPTSTPAQGSISDTQQTSLWNFLSDKRRKLLFNSMNLNFNRKFSSLKHDISEICKLKNL	no	17,16,1,6	NA	9e-12	NA	NA	NA	NA	NA	NA	NA	NA	NA	NA	NA	NA
Hordeum vulgare	HORVU3Hr1G001250.1	CNL	partial	HORVU3Hr1G001250.1:15	HORVU3Hr1G001250.1:678	QELEERRKVVCILGTGGIGKSTLATGIYRQLQGRFSCGAFVHLGRNPSVKTTLISILKQVMPDWHCEEYLWNGYNSEDMEAWDEKKVINKLWAFLKTKSYFVVLVDMRSISTWKKFSCVLPNKDKSSDRILITTCTKDVAESCCIHPSDFLHPMERLSEEDSKTLFHSKVPVSEQHRLLEVSDDMLEMCGGGVPLAITITAALLSRKSACL	no	17,16,1,6,4,5,10,3,12,2,8,7,9,9	yes	1.4e-22	NA	NA	NA	NA	152	432	279	no	no	NA	NA	NA
Hordeum vulgare	HORVU3Hr1G001250.2	CNL	partial	HORVU3Hr1G001250.2:15	HORVU3Hr1G001250.2:678	QELEERRKVVCILGTGGIGKSTLATGIYRQLQGRFSCGAFVHLGRNPSVKTTLISILKQVMPDWHCEEYLWNGYNSEDMEAWDEKKVINKLWAFLKTKRYFVVLVDMRSISTWKKFSCVLPNKDKSSDRILITTCTKDVAESCCIHPSDFLHPMERLSEEDSKTLFHSKVPVSEQHRLLEVSDDMLEMCGGGVPLAITITAALLSRKSACL	no	17,16,1,6,4,5,10,3,12,2,8,7,9,9	yes	1.6e-23	NA	NA	NA	NA	152	432	524	no	no	yes	NA	NA
Hordeum vulgare	HORVU3Hr1G001250.3	CNL	partial	HORVU3Hr1G001250.3:15	HORVU3Hr1G001250.3:678	QELEERRKVVCILGTGGIGKSTLATGIYRQLQGRFSCGAFVHLGRNPSVKTTLISILKQVMPDWHCEEYLWNGYNSEDMEAWDEKKVINKLWAFLKTKSYFVVLVDMRSISTWKKFSCVLPNKDKSSDRILITTCTKDVAESCCIHPSDFLHPMERLSEEDSKTLFHSKVPVSEQHRLLEVSDDMLEMCGGGVPLAITITAALLSRKSACL	no	17,16,1,6,4,5,10,3,12,2,8,7,9,9	yes	2.1e-22	NA	NA	NA	NA	152	432	524	no	no	NA	NA	NA
Hordeum vulgare	HORVU3Hr1G001250.4	CNL	partial	HORVU3Hr1G001250.4:15	HORVU3Hr1G001250.4:678	QELEERRKVVCILGTGGIGKSTLATGIYRQLQGRFSCGAFVHLGRNPSVKTTLISILKQVMPDWHCEEYLWNGYNSEDMEAWDEKKVINKLWAFLKTKSYFVVLVDMRSISTWKKFSCVLPNKDKSSDRILITTCTKDVAESCCIHPSDFLHPMERLSEEDSKTLFHSKVPVSEQHRLLEVSDDMLEMCGGGVPLAITITAALLSRKSACL	no	17,16,1,6,4,5,10,3,12,2,8,7,9,9	yes	1.4e-22	NA	NA	NA	NA	152	432	279	no	no	NA	NA	NA
Hordeum vulgare	HORVU3Hr1G001250.5	CNL	partial	HORVU3Hr1G001250.5:15	HORVU3Hr1G001250.5:678	QELEERRKVVCILGTGGIGKSTLATGIYRQLQGRFSCGAFVHLGRNPSVKTTLISILKQVMPDWHCEEYLWNGYNSEDMEAWDEKKVINKLWAFLKTKSYFVVLVDMRSISTWKKFSCVLPNKDKSSDRILITTCTKDVAESCCIHPSDFLHPMERLSEEDSKTLFHSKVPVSEQHRLLEVSDDMLEMCGGGVPLAITITAALLSRKSACL	no	17,16,1,6,4,5,10,3,12,2,8,7,9,9	yes	1.5e-22	NA	NA	NA	NA	152	432	311	no	no	yes	NA	NA
Hordeum vulgare	HORVU3Hr1G001250.6	CNL	partial	HORVU3Hr1G001250.6:15	HORVU3Hr1G001250.6:653	MDEEERRKVVCILGTGGIGKSTLATGIYRQLQGRFSCGAFVHLGRNPSVKTTLISILKQVMPDWHCEEYLWNGYNSEDMEAWDEKKVINKLWAFLKTKSYFVVLVDMRSISTWKKFSCVLPNKDKSSDRILITTCTKDVAESCCIHPSDFLHPMERLSEEDSKTLFHSKVPVSEQHRLLEVSDDMLEMCGGGVPLAITITAALLSRKSACL	no	17,16,1,6,4,5,10,3,12,2,8,7,9,9	yes	8.5e-24	0.0039	NA	NA	NA	152	407	524	no	no	NA	NA	NA
Hordeum vulgare	HORVU3Hr1G001250.7	CNL	partial	HORVU3Hr1G001250.7:23	HORVU3Hr1G001250.7:413	NA	no	4,5,10,3,12,2,8,7,9,9	NA	1.4e-09	0.0043	NA	NA	NA	NA	NA	NA	NA	NA	NA	NA	NA
Hordeum vulgare	HORVU3Hr1G001250.8	CNL	partial	HORVU3Hr1G001250.8:4	HORVU3Hr1G001250.8:270	NA	no	12,2,8,7,9,9	NA	NA	0.0027	NA	NA	NA	NA	NA	NA	NA	NA	NA	NA	NA
Hordeum vulgare	HORVU3Hr1G001340.6	NA	partial	HORVU3Hr1G001340.6:53	HORVU3Hr1G001340.6:542	NA	no	11,11,9,11,11,11,11,11	NA	NA	1.7e-09	NA	0.0071	NA	NA	NA	NA	NA	NA	NA	NA	NA
Hordeum vulgare	HORVU3Hr1G001340.7	NA	partial	HORVU3Hr1G001340.7:10	HORVU3Hr1G001340.7:389	NA	no	9,11,11,11,11,11	NA	NA	3e-05	NA	0.018	NA	NA	NA	NA	NA	NA	NA	NA	NA
Hordeum vulgare	HORVU3Hr1G001380.1	NA	partial	HORVU3Hr1G001380.1:122	HORVU3Hr1G001380.1:985	NA	no	8,9,11,11,11,11,11	yes	0.00018	2e-10	NA	0.65	NA	NA	NA	NA	NA	NA	NA	NA	NA
Hordeum vulgare	HORVU3Hr1G001380.2	NA	partial	HORVU3Hr1G001380.2:117	HORVU3Hr1G001380.2:980	NA	no	8,9,11,11,11,11,11	yes	0.00017	1.9e-10	NA	0.64	NA	NA	NA	NA	NA	NA	NA	NA	NA
Hordeum vulgare	HORVU3Hr1G001380.3	NA	partial	HORVU3Hr1G001380.3:112	HORVU3Hr1G001380.3:975	NA	no	8,9,11,11,11,11,11	yes	0.00017	1.9e-10	NA	0.62	NA	NA	NA	NA	NA	NA	NA	NA	NA
Hordeum vulgare	HORVU3Hr1G001510.1	CNL	complete	HORVU3Hr1G001510.1:20	HORVU3Hr1G001510.1:861	DLEEPGCKIATIWGMGGVGKTTLVHHLYKAVKTNFSISAWITVSSSCQVEELLKQIASQLGVAIGAANTNRDLVEVICNCLQGSKYLIVLDDVWNVDLWFKIRNAFPTESTGRFVITTRIQEVALLATKNCTIKLEPLQIWYAWQLFCNEAFWNNVKKTCPDDLKNLAHQFLGKCGGLPIAIACVGRLLSCRHPTYSQWECLYKELELQLS	no	17,16,1,6,4,5,10,3,12,2,8,7,9,9,9,11,11	yes	6.7e-47	0.0041	NA	NA	NA	173	368	369	no	no	NA	NA	NA
Hordeum vulgare	HORVU3Hr1G001510.2	CNL	complete	HORVU3Hr1G001510.2:20	HORVU3Hr1G001510.2:861	DLEEPGCKIATIWGMGGVGKTTLVHHLYKAVKTNFSISAWITVSSSCQVEELLKQIASQLGVAIGAANTNRDLVEVICNCLQGSKYLIVLDDVWNVDLWFKIRNAFPTESTGRFVITTRIQEVALLATKNCTIKLEPLQIWYAWQLFCNEAFWNNVKKTCPDDLKNLAHQFLGKCGGLPIAIACVGRLLSCRHPTYSQWECLYKELELQLS	no	17,16,1,6,4,5,10,3,12,2,8,7,9,9,9,11,11	yes	6.7e-47	0.0041	NA	NA	NA	173	368	369	no	no	NA	NA	NA
Hordeum vulgare	HORVU3Hr1G001510.3	CNL	complete	HORVU3Hr1G001510.3:20	HORVU3Hr1G001510.3:861	DLEEPGCKIATIWGMGGVGKTTLVHHLYKAVKTNFSISAWITVSSSCQVEELLKQIASQLGVAIGAANTNRDLVEVICNCLQGSKYLIVLDDVWNVDLWFKIRNAFPTESTGRFVITTRIQEVALLATKNCTIKLEPLQIWYAWQLFCNEAFWNNVKKTCPDDLKNLAHQFLGKCGGLPIAIACVGRLLSCRHPTYSQWECLYKELELQLS	no	17,16,1,6,4,5,10,3,12,2,8,7,9,9,9,11,11	yes	6.7e-47	0.0041	NA	NA	NA	173	368	369	no	no	NA	NA	NA
Hordeum vulgare	HORVU3Hr1G001510.4	CNL	complete	HORVU3Hr1G001510.4:20	HORVU3Hr1G001510.4:861	DLEEPGCKIATIWGMGGVGKTTLVHHLYKAVKTNFSISAWITVSSSCQVEELLKQIASQLGVAIGAANTNRDLVEVICNCLQGSKYLIVLDDVWNVDLWFKIRNAFPTESTGRFVITTRIQEVALLATKNCTIKLEPLQIWYAWQLFCNEAFWNNVKKTCPDDLKNLAHQFLGKCGGLPIAIACVGRLLSCRHPTYSQWECLYKELELQLS	no	17,16,1,6,4,5,10,3,12,2,8,7,9,9,9,11,11	yes	6.7e-47	0.0041	NA	NA	NA	173	368	369	no	no	yes	NA	NA
Hordeum vulgare	HORVU3Hr1G001510.5	NA	partial	HORVU3Hr1G001510.5:77	HORVU3Hr1G001510.5:371	NA	no	9,9,9,11,11	NA	NA	2.5e-06	NA	NA	NA	NA	NA	NA	NA	NA	NA	NA	NA
Hordeum vulgare	HORVU3Hr1G001510.6	CNL	complete	HORVU3Hr1G001510.6:20	HORVU3Hr1G001510.6:861	DLEEPGCKIATIWGMGGVGKTTLVHHLYKAVKTNFSISAWITVSSSCQVEELLKQIASQLGVAIGAANTNRDLVEVICNCLQGSKYLIVLDDVWNVDLWFKIRNAFPTESTGRFVITTRIQEVALLATKNCTIKLEPLQIWYAWQLFCNEAFWNNVKKTCPDDLKNLAHQFLGKCGGLPIAIACVGRLLSCRHPTYSQWECLYKELELQLS	no	17,16,1,6,4,5,10,3,12,2,8,7,9,9,9,11,11	yes	6.7e-47	0.0041	NA	NA	NA	173	368	369	no	no	NA	NA	NA
Hordeum vulgare	HORVU3Hr1G001570.1	CNL	complete	HORVU3Hr1G001570.1:20	HORVU3Hr1G001570.1:861	DLEEPGTKIAAIWGMGGVGKTTLVHHLYKAVKTNFSISVWITVSSSCQVEDLLKQIASQLGVAIGAANTNRDLVEVICNYLQGSKYLIVLDDVWHVDLWFKIRNAFPRESTGRFVITTRIQEVALLATKNCTIKLEPLQRRYAWQLFCNEAFWNNVKKTCPDDLKNLAHQFLGKCGGLPIAIACVGRLLSCRHPTYSQWESLYKELELQLS	no	17,16,1,6,4,5,10,3,12,2,8,7,9,9,9,11,11	yes	7e-48	0.0058	NA	NA	NA	173	368	369	no	no	yes	NA	NA
Hordeum vulgare	HORVU3Hr1G002150.1	CNL	complete	HORVU3Hr1G002150.1:14	HORVU3Hr1G002150.1:669	TGGYEKQAVLSIVGFGGVGKTTIAMALYQNARDKFDCRASVTVSQNYDEDAVLALILKQVKPQESDHKKQGNTGSSDVKQIRSEAMNHKELVEQLKSHLAKKRYLLLIDDIWSAQTWEDIRKCLPDDDDNTEGSRVIVTTRFQAVGATCSHRDNIDRFHQVDFLDDKDSKSLFDRSVSESNNSKGSMKEPPPDEIWKICRGLPLAIVVMAG	no	17,16,1,6,4,5,10,3,12,2,8,7,11,9,9	yes	3.7e-42	NA	NA	NA	NA	177	400	377	no	no	NA	NA	NA
Hordeum vulgare	HORVU3Hr1G002150.10	CNL	partial	HORVU3Hr1G002150.10:11	HORVU3Hr1G002150.10:384	NA	no	4,5,10,3,12,2,8,7,11,9,9	NA	8.5e-25	NA	NA	0.069	NA	NA	NA	NA	NA	NA	NA	NA	NA
Hordeum vulgare	HORVU3Hr1G002150.11	CNL	partial	HORVU3Hr1G002150.11:11	HORVU3Hr1G002150.11:384	NA	no	4,5,10,3,12,2,8,7,11,9,9	NA	8.9e-25	NA	NA	0.075	NA	NA	NA	NA	NA	NA	NA	NA	NA
Hordeum vulgare	HORVU3Hr1G002150.12	CNL	partial	HORVU3Hr1G002150.12:11	HORVU3Hr1G002150.12:384	NA	no	4,5,10,3,12,2,8,7,11,9,9	NA	1.1e-24	NA	NA	0.11	NA	NA	NA	NA	NA	NA	NA	NA	NA
Hordeum vulgare	HORVU3Hr1G002150.13	CNL	partial	HORVU3Hr1G002150.13:11	HORVU3Hr1G002150.13:384	NA	no	4,5,10,3,12,2,8,7,11,9,9	NA	8.5e-25	NA	NA	0.11	NA	NA	NA	NA	NA	NA	NA	NA	NA
Hordeum vulgare	HORVU3Hr1G002150.2	CNL	complete	HORVU3Hr1G002150.2:14	HORVU3Hr1G002150.2:669	TGGYEKQAVLSIVGFGGVGKTTIAMALYQNARDKFDCRASVTVSQNYDEDAVLALILKQVKPQESDHKKQGNTGSSDVKQIRSEAMNHKELVEQLKSHLAKKRYLLLIDDIWSAQTWEDIRKCLPDDDDNTEGSRVIVTTRFQAVGATCSHRDNIDRFHQVDFLDDKDSKSLFDRSVSESNNSKGSMKEPPPDEIWKICRGLPLAIVVMAG	no	17,16,1,6,4,5,10,3,12,2,8,7,11,9,9	yes	3.7e-42	NA	NA	NA	NA	177	400	377	no	no	NA	NA	NA
Hordeum vulgare	HORVU3Hr1G002150.3	CNL	complete	HORVU3Hr1G002150.3:14	HORVU3Hr1G002150.3:669	TGGYEKQAVLSIVGFGGVGKTTIAMALYQNARDKFDCRASVTVSQNYDEDAVLALILKQVKPQESDHKKQGNTGSSDVKQIRSEAMNHKELVEQLKSHLAKKRYLLLIDDIWSAQTWEDIRKCLPDDDDNTEGSRVIVTTRFQAVGATCSHRDNIDRFHQVDFLDDKDSKSLFDRSVSESNNSKGSMKEPPPDEIWKICRGLPLAIVVMAG	no	17,16,1,6,4,5,10,3,12,2,8,7,11,9,9	yes	3.7e-42	NA	NA	NA	NA	177	400	377	no	no	NA	NA	NA
Hordeum vulgare	HORVU3Hr1G002150.4	CNL	complete	HORVU3Hr1G002150.4:14	HORVU3Hr1G002150.4:669	TGGYEKQAVLSIVGFGGVGKTTIAMALYQNARDKFDCRASVTVSQNYDEDAVLALILKQVKPQESDHKKQGNTGSSDVKQIRSEAMNHKELVEQLKSHLAKKRYLLLIDDIWSAQTWEDIRKCLPDDDDNTEGSRVIVTTRFQAVGATCSHRDNIDRFHQVDFLDDKDSKSLFDRSVSESNNSKGSMKEPPPDEIWKICRGLPLAIVVMAG	no	17,16,1,6,4,5,10,3,12,2,8,7,11,9,9	yes	3.7e-42	NA	NA	NA	NA	177	400	377	no	no	NA	NA	NA
Hordeum vulgare	HORVU3Hr1G002150.5	CNL	complete	HORVU3Hr1G002150.5:14	HORVU3Hr1G002150.5:669	TGGYEKQAVLSIVGFGGVGKTTIAMALYQNARDKFDCRASVTVSQNYDEDAVLALILKQVKPQESDHKKQGNTGSSDVKQIRSEAMNHKELVEQLKSHLAKKRYLLLIDDIWSAQTWEDIRKCLPDDDDNTEGSRVIVTTRFQAVGATCSHRDNIDRFHQVDFLDDKDSKSLFDRSVSESNNSKGSMKEPPPDEIWKICRGLPLAIVVMAG	no	17,16,1,6,4,5,10,3,12,2,8,7,11,9,9	yes	3.7e-42	NA	NA	NA	NA	177	400	377	no	no	NA	NA	NA
Hordeum vulgare	HORVU3Hr1G002150.6	CNL	partial	HORVU3Hr1G002150.6:2	HORVU3Hr1G002150.6:375	NA	no	4,5,10,3,12,2,8,7,11,9,9	NA	2.6e-23	NA	NA	0.1	NA	NA	NA	NA	NA	NA	NA	NA	NA
Hordeum vulgare	HORVU3Hr1G002150.7	CNL	partial	HORVU3Hr1G002150.7:2	HORVU3Hr1G002150.7:375	NA	no	4,5,10,3,12,2,8,7,11,9,9	NA	2.6e-23	NA	NA	0.1	NA	NA	NA	NA	NA	NA	NA	NA	NA
Hordeum vulgare	HORVU3Hr1G002150.8	CNL	complete	HORVU3Hr1G002150.8:14	HORVU3Hr1G002150.8:669	TGGYEKQAVLSIVGFGGVGKTTIAMALYQNARDKFDCRASVTVSQNYDEDAVLALILKQVKPQESDHKKQGNTGSSDVKQIRSEAMNHKELVEQLKSHLAKKRYLLLIDDIWSAQTWEDIRKCLPDDDDNTEGSRVIVTTRFQAVGATCSHRDNIDRFHQVDFLDDKDSKSLFDRSVSESNNSKGSMKEPPPDEIWKICRGLPLAIVVMAG	no	17,16,1,6,4,5,10,3,12,2,8,7,11,9,9	yes	3.7e-42	NA	NA	NA	NA	177	400	377	no	no	yes	NA	yes
Hordeum vulgare	HORVU3Hr1G002150.9	CNL	complete	HORVU3Hr1G002150.9:14	HORVU3Hr1G002150.9:669	TGGYEKQAVLSIVGFGGVGKTTIAMALYQNARDKFDCRASVTVSQNYDEDAVLALILKQVKPQESDHKKQGNTGSSDVKQIRSEAMNHKELVEQLKSHLAKKRYLLLIDDIWSAQTWEDIRKCLPDDDDNTEGSRVIVTTRFQAVGATCSHRDNIDRFHQVDFLDDKDSKSLFDRSVSESNNSKGSMKEPPPDEIWKICRGLPLAIVVMAG	no	17,16,1,6,4,5,10,3,12,2,8,7,11,9,9	yes	3.7e-42	NA	NA	NA	NA	177	400	377	no	no	NA	NA	NA
Hordeum vulgare	HORVU3Hr1G003810.1	CNL	partial	HORVU3Hr1G003810.1:19	HORVU3Hr1G003810.1:555	KDEEQRHMIITVWGMGGVGKTTLVAHVYNAIKTDFDTCAWITVSHSYEANDLLRQIVEEFRKNDRKKEFPNDVDVTDYRSLVETIRRYLEKKRYVLVLDDVWSVNVWFDSKDAFFGGKLGRIIFTSRIYEVALLASEAQMINLQPLQNHYAWDLFCKEAFWKNENRDCPPELQYWANKFVEKCNGLPIAIVCIGRLLSFKSATFLEWENVY	no	17,16,1,6,4,5,10,3,12,2,8,7,17	NA	8.5e-50	NA	NA	NA	NA	NA	NA	NA	NA	NA	NA	NA	NA
Hordeum vulgare	HORVU3Hr1G003810.2	CNL	partial	HORVU3Hr1G003810.2:19	HORVU3Hr1G003810.2:555	KDEEQRHMIITVWGMGGVGKTTLVAHVYNAIKTDFDTCAWITVSHSYEANDLLRQIVEEFRKNDRKKEFPNDVDVTDYRSLVETIRRYLEKKRYVLVLDDVWSVNVWFDSKDAFFGGKLGRIIFTSRIYEVALLASEAQMINLQPLQNHYAWDLFCKEAFWKNENRDCPPELQYWANKFVEKCNGLPIAIVCIGRLLSFKSATFLEWENVY	no	17,16,1,6,4,5,10,3,12,2,8,7,17	NA	8.5e-50	NA	NA	NA	NA	NA	NA	NA	NA	NA	NA	NA	NA
Hordeum vulgare	HORVU3Hr1G003810.3	CNL	partial	HORVU3Hr1G003810.3:19	HORVU3Hr1G003810.3:555	KDEEQRHMIITVWGMGGVGKTTLVAHVYNAIKTDFDTCAWITVSHSYEANDLLRQIVEEFRKNDRKKEFPNDVDVTDYRSLVETIRRYLEKKRYVLVLDDVWSVNVWFDSKDAFFGGKLGRIIFTSRIYEVALLASEAQMINLQPLQNHYAWDLFCKEAFWKNENRDCPPELQYWANKFVEKCNGLPIAIVCIGRLLSFKSATFLEWENVY	no	17,16,1,6,4,5,10,3,12,2,8,7,17	NA	8.5e-50	NA	NA	NA	NA	NA	NA	NA	NA	NA	NA	NA	NA
Hordeum vulgare	HORVU3Hr1G003810.4	CNL	complete	HORVU3Hr1G003810.4:19	HORVU3Hr1G003810.4:868	KDEEQRHMIITVWGMGGVGKTTLVAHVYNAIKTDFDTCAWITVSHSYEANDLLRQIVEEFRKNDRKKEFPNDVDVTDYRSLVETIRRYLEKKRYVLVLDDVWSVNVWFDSKDAFFGGKLGRIIFTSRIYEVALLASEAQMINLQPLQNHYAWDLFCKEAFWKNENRDCPPELQYWANKFVEKCNGLPIAIVCIGRLLSFKSATFLEWENVY	no	17,16,1,6,4,5,10,3,12,2,8,7,17,9,9,9,11,11,11	yes	2.3e-49	0.0049	NA	NA	NA	176	372	374	no	no	yes	NA	NA
Hordeum vulgare	HORVU3Hr1G004100.1	CNL	partial	HORVU3Hr1G004100.1:4	HORVU3Hr1G004100.1:552	GSNHRALKVVAITGFGGIGKTTLASQVRDMIKGRFDCTAFVSVSQNPSMVDILSTILSQVGSSVPVPSGQNSVQSLISKLREHLMAKRYLIIIDDIWTIEPWNTIKCAFVENKRASRVITTTRIEDVAQACCCGFRGHVYKVKPLNVLDSRRLFHRRIFSSEDACPEKLKDVSDEILNKCEGVPLVIVSVASILASHKEGKSKKFWEKIQN	no	16,14,1,6,4,5,10,3,12,2,8,7,9	yes	1.6e-40	0.002	NA	NA	NA	93	389	386	no	no	yes	NA	NA
Hordeum vulgare	HORVU3Hr1G004100.2	CNL	partial	HORVU3Hr1G004100.2:15	HORVU3Hr1G004100.2:624	GSNHRALKVVAITGFGGIGKTTLASQVRDMIKGRFDCTAFVSVSQNPSMVDILSTILSQVGSSVPVPSGQNSVQSLISKLREHLMAKRYLIIIDDIWTIEPWNTIKCAFVENKRASRVITTTRIEDVAQACCCGFRGHVYKVKPLNVLDSRRLFHRRIFSSEDACPEKLKDVSDEILNKCEGVPLVIVSVASILASHKEGKSKKFWEKIQN	no	17,16,14,1,6,4,5,10,3,12,2,8,7,9	yes	1.6e-40	0.0026	NA	NA	NA	165	389	386	no	no	yes	NA	NA
Hordeum vulgare	HORVU3Hr1G004100.3	NA	partial	HORVU3Hr1G004100.3:36	HORVU3Hr1G004100.3:198	NA	no	8,7,9	NA	NA	0.0082	NA	NA	NA	NA	NA	NA	NA	NA	NA	NA	NA
Hordeum vulgare	HORVU3Hr1G004100.4	CNL	partial	HORVU3Hr1G004100.4:30	HORVU3Hr1G004100.4:327	NA	no	10,3,12,2,8,7,9	NA	5.5e-10	0.002	NA	NA	NA	NA	NA	NA	NA	NA	NA	NA	NA
Hordeum vulgare	HORVU3Hr1G004100.5	CNL	partial	HORVU3Hr1G004100.5:15	HORVU3Hr1G004100.5:624	GSNHRALKVVAITGFGGIGKTTLASQVRDMIKGRFDCTAFVSVSQNPSMVDILSTILSQVGSSVPVPSGQNSVQSLISKLREHLMAKRYLIIIDDIWTIEPWNTIKCAFVENKRASRVITTTRIEDVAQACCCGFRGHVYKVKPLNVLDSRRLFHRRIFSSEDACPEKLKDVSDEILNKCEGVPLVIVSVASILASHKEGKSKKFWEKIQN	no	17,16,14,1,6,4,5,10,3,12,2,8,7,9	yes	1.6e-40	0.0026	NA	NA	NA	165	389	386	no	no	yes	NA	NA
Hordeum vulgare	HORVU3Hr1G005090.1	CNL	partial	HORVU3Hr1G005090.1:67	HORVU3Hr1G005090.1:192	GGSVQQTKVLSIVGFGGLGKTTLANQIYHRLKWQDQCQAFVSVSQKPNIRMILRRMLSQVGYEVPGGTNMEIWAEDELISKLGEFLIDKRYFIVIDDIWDETIWNVIRCALPENMYGSMIITTTRINSVARACCCNQLDYVYKMKSLSKENSRNLFFEMGISFRRCLPTVLGRSFSSNFKKMWWLASCNFEQ	no	1,6,4,5	NA	2e-29	NA	NA	NA	NA	NA	NA	NA	NA	NA	NA	NA	NA
Hordeum vulgare	HORVU3Hr1G006430.1	CNL	partial	HORVU3Hr1G006430.1:18	HORVU3Hr1G006430.1:943	NA	no	12,2,8,7,9,11,11,11,11,11,11,11,11,11	yes	NA	NA	NA	NA	NA	NA	NA	NA	NA	NA	NA	NA	NA
Hordeum vulgare	HORVU3Hr1G006430.2	CNL	partial	HORVU3Hr1G006430.2:18	HORVU3Hr1G006430.2:943	NA	no	12,2,8,7,9,11,11,11,11,11,11,11,11,11	yes	NA	NA	NA	NA	NA	NA	NA	NA	NA	NA	NA	NA	NA
Hordeum vulgare	HORVU3Hr1G006430.3	CNL	partial	HORVU3Hr1G006430.3:18	HORVU3Hr1G006430.3:813	NA	no	12,2,8,7,9,11,11,11,11,11,11,11	yes	NA	NA	NA	NA	NA	NA	NA	NA	NA	NA	NA	NA	NA
Hordeum vulgare	HORVU3Hr1G006430.4	CNL	partial	HORVU3Hr1G006430.4:18	HORVU3Hr1G006430.4:943	NA	no	12,2,8,7,9,11,11,11,11,11,11,11,11,11	yes	NA	NA	NA	NA	NA	NA	NA	NA	NA	NA	NA	NA	NA
Hordeum vulgare	HORVU3Hr1G006430.5	CNL	partial	HORVU3Hr1G006430.5:18	HORVU3Hr1G006430.5:813	NA	no	12,2,8,7,9,11,11,11,11,11,11,11	yes	NA	NA	NA	NA	NA	NA	NA	NA	NA	NA	NA	NA	NA
Hordeum vulgare	HORVU3Hr1G006430.6	CNL	partial	HORVU3Hr1G006430.6:18	HORVU3Hr1G006430.6:742	NA	no	12,2,8,7,9,11,11,11,11,11	yes	NA	NA	NA	NA	NA	NA	NA	NA	NA	NA	NA	NA	NA
Hordeum vulgare	HORVU3Hr1G006760.1	TNL	partial	HORVU3Hr1G006760.1:127	HORVU3Hr1G006760.1:298	NPVSDEPVVLPIIGAVAVGKKTLVAHVCNNERVRSHFTSILHLNGDSLLRIIEHDRTMLGSRFLVVVDFVSHVDDKDWTKFYSFLRRMGKGSKVIIISKLQTLARFGTVKPIYLNPLSYEEYWYLLKTLTFGSADPSEHPQLVRVAEEFAKIFHPGGSLMAANAFADVLRRNFDVEFWLCLLGKTRGVIQKNLSEHGVDPYQRFEQGHTVD	no	7,1,4,5	NA	7.9e-09	NA	NA	NA	NA	NA	NA	NA	NA	NA	NA	NA	NA
Hordeum vulgare	HORVU3Hr1G010310.10	CNL	partial	HORVU3Hr1G010310.10:3	HORVU3Hr1G010310.10:508	EDGANRLRVAAVVGSGGMGKTTLAHQVYTKIKSQFDCKAFVTVSQNASTFKTLSDIYQAFRGWMPSSLKDGQLIVELRNYLRDKRYLIVLDDIWAINAWNTFKVCFVENNLGSRVITTTRNEDVAKACCSCFHGHVYRIKPLNDLDSRRLFYKRVFYSDEACPKQLKNVSGEILKKCDGVPLAILSVASYLASHEEVSSKETWEKMQNHLG	no	17,16,14,1,6,4,5,10,3,12,2,8,7	NA	1.7e-41	NA	NA	NA	NA	NA	NA	NA	NA	NA	NA	NA	NA
Hordeum vulgare	HORVU3Hr1G010310.11	CNL	partial	HORVU3Hr1G010310.11:3	HORVU3Hr1G010310.11:508	EDGANRLRVAAVVGSGGMGKTTLAHQVYTKIKSQFDCKAFVTVSQNASTFKTLSDIYQAFRGWMPSSLKDGQLIVELRNYLRDKRYLIVLDDIWAINAWNTFKVCFVENNLGSRVITTTRNEDVAKACCSCFHGHVYRIKPLNDLDSRRLFYKRVFYSDEACPKQLKNVSGEILKKCDGVPLAILSVASYLASHEEVSSKETWEKMQNHLG	no	17,16,14,1,6,4,5,10,3,12,2,8,7	NA	1.7e-41	NA	NA	NA	NA	NA	NA	NA	NA	NA	NA	NA	NA
Hordeum vulgare	HORVU3Hr1G010310.12	CNL	partial	HORVU3Hr1G010310.12:3	HORVU3Hr1G010310.12:508	EDGANRLRVAAVVGSGGMGKTTLAHQVYTKIKSQFDCKAFVTVSQNASTFKTLSDIYQAFRGWMPSSLKDGQLIVELRNYLRDKRYLIVLDDIWAINAWNTFKVCFVENNLGSRVITTTRNEDVAKACCSCFHGHVYRIKPLNDLDSRRLFYKRVFYSDEACPKQLKNVSGEILKKCDGVPLAILSVASYLASHEEVSSKETWEKMQNHLG	no	17,16,14,1,6,4,5,10,3,12,2,8,7	NA	1.7e-41	NA	NA	NA	NA	NA	NA	NA	NA	NA	NA	NA	NA
Hordeum vulgare	HORVU3Hr1G010310.13	CNL	partial	HORVU3Hr1G010310.13:3	HORVU3Hr1G010310.13:508	EDGANRLRVAAVVGSGGMGKTTLAHQVYTKIKSQFDCKAFVTVSQNASTFKTLSDIYQAFRGWMPSSLKDGQLIVELRNYLRDKRYLIVLDDIWAINAWNTFKVCFVENNLGSRVITTTRNEDVAKACCSCFHGHVYRIKPLNDLDSRRLFYKRVFYSDEACPKQLKNVSGEILKKCDGVPLAILSVASYLASHEEVSSKETWEKMQNHLG	no	17,16,14,1,6,4,5,10,3,12,2,8,7	NA	1.7e-41	NA	NA	NA	NA	NA	NA	NA	NA	NA	NA	NA	NA
Hordeum vulgare	HORVU3Hr1G010310.14	CNL	partial	HORVU3Hr1G010310.14:3	HORVU3Hr1G010310.14:454	EDGANRLRVAAVVGSGGMGKTTLAHQVYTKIKSQFDCKAFVTVSQNASTFKTLSDIYQAFRGWMPSSLKDGQLIVELRNYLRDKRYLIVLDDIWAINAWNTFKVCFVENNLGSRVITTTRNEDVAKACCSCFHGHVYRIKPLNDLDSRRLFYKRVFYSDEACPKQLKNVSGEILKKCDGVPLAILSVASYLASHEEGSKIRKENLVKRWIS	no	17,16,14,1,6,4,5,10,3,8,7	NA	7.4e-40	NA	NA	NA	NA	NA	NA	NA	NA	NA	NA	NA	NA
Hordeum vulgare	HORVU3Hr1G010310.15	CNL	partial	HORVU3Hr1G010310.15:3	HORVU3Hr1G010310.15:454	EDGANRLRVAAVVGSGGMGKTTLAHQVYTKIKSQFDCKAFVTVSQNASTFKTLSDIYQAFRGWMPSSLKDGQLIVELRNYLRDKRYLIVLDDIWAINAWNTFKVCFVENNLGSRVITTTRNEDVAKACCSCFHGHVYRIKPLNDLDSRRLFYKRVFYSDEACPKQLKNVSGEILKKCDGVPLAILSVASYLASHEEGSKIRKENLVKRWIS	no	17,16,14,1,6,4,5,10,3,8,7	NA	7.4e-40	NA	NA	NA	NA	NA	NA	NA	NA	NA	NA	NA	NA
Hordeum vulgare	HORVU3Hr1G010310.16	CNL	partial	HORVU3Hr1G010310.16:3	HORVU3Hr1G010310.16:508	EDGANRLRVAAVVGSGGMGKTTLAHQVYTKIKSQFDCKAFVTVSQNASTFKTLSDIYQAFRGWMPSSLKDGQLIVELRNYLRDKRYLIVLDDIWAINAWNTFKVCFVENNLGSRVITTTRNEDVAKACCSCFHGHVYRIKPLNDLDSRRLFYKRVFYSDEACPKQLKNVSGEILKKCDGVPLAILSVASYLASHEEVSSKETWEKMQNHLG	no	17,16,14,1,6,4,5,10,3,12,2,8,7	NA	1.7e-41	NA	NA	NA	NA	NA	NA	NA	NA	NA	NA	NA	NA
Hordeum vulgare	HORVU3Hr1G010310.2	CNL	partial	HORVU3Hr1G010310.2:3	HORVU3Hr1G010310.2:508	EDGANRLRVAAVVGSGGMGKTTLAHQVYTKIKSQFDCKAFVTVSQNASTFKTLSDIYQAFRGWMPSSLKDGQLIVELRNYLRDKRYLIVLDDIWAINAWNTFKVCFVENNLGSRVITTTRNEDVAKACCSCFHGHVYRIKPLNDLDSRRLFYKRVFYSDEACPKQLKNVSGEILKKCDGVPLAILSVASYLASHEEVSSKETWEKMQNHLG	no	17,16,14,1,6,4,5,10,3,12,2,8,7	NA	1.7e-41	NA	NA	NA	NA	NA	NA	NA	NA	NA	NA	NA	NA
Hordeum vulgare	HORVU3Hr1G010310.21	CNL	partial	HORVU3Hr1G010310.21:3	HORVU3Hr1G010310.21:454	EDGANRLRVAAVVGSGGMGKTTLAHQVYTKIKSQFDCKAFVTVSQNASTFKTLSDIYQAFRGWMPSSLKDGQLIVELRNYLRDKRYLIVLDDIWAINAWNTFKVCFVENNLGSRVITTTRNEDVAKACCSCFHGHVYRIKPLNDLDSRRLFYKRVFYSDEACPKQLKNVSGEILKKCDGVPLAILSVASYLASHEEGSKIRKENLVKRWIS	no	17,16,14,1,6,4,5,10,3,8,7	NA	7.4e-40	NA	NA	NA	NA	NA	NA	NA	NA	NA	NA	NA	NA
Hordeum vulgare	HORVU3Hr1G010310.3	CNL	partial	HORVU3Hr1G010310.3:3	HORVU3Hr1G010310.3:508	EDGANRLRVAAVVGSGGMGKTTLAHQVYTKIKSQFDCKAFVTVSQNASTFKTLSDIYQAFRGWMPSSLKDGQLIVELRNYLRDKRYLIVLDDIWAINAWNTFKVCFVENNLGSRVITTTRNEDVAKACCSCFHGHVYRIKPLNDLDSRRLFYKRVFYSDEACPKQLKNVSGEILKKCDGVPLAILSVASYLASHEEVSSKETWEKMQNHLG	no	17,16,14,1,6,4,5,10,3,12,2,8,7	NA	1.7e-41	NA	NA	NA	NA	NA	NA	NA	NA	NA	NA	NA	NA
Hordeum vulgare	HORVU3Hr1G010310.4	CNL	partial	HORVU3Hr1G010310.4:3	HORVU3Hr1G010310.4:454	EDGANRLRVAAVVGSGGMGKTTLAHQVYTKIKSQFDCKAFVTVSQNASTFKTLSDIYQAFRGWMPSSLKDGQLIVELRNYLRDKRYLIVLDDIWAINAWNTFKVCFVENNLGSRVITTTRNEDVAKACCSCFHGHVYRIKPLNDLDSRRLFYKRVFYSDEACPKQLKNVSGEILKKCDGVPLAILSVASYLASHEEGSKIRKENLVKRWIS	no	17,16,14,1,6,4,5,10,3,8,7	NA	7.4e-40	NA	NA	NA	NA	NA	NA	NA	NA	NA	NA	NA	NA
Hordeum vulgare	HORVU3Hr1G010310.5	CNL	partial	HORVU3Hr1G010310.5:3	HORVU3Hr1G010310.5:508	EDGANRLRVAAVVGSGGMGKTTLAHQVYTKIKSQFDCKAFVTVSQNASTFKTLSDIYQAFRGWMPSSLKDGQLIVELRNYLRDKRYLIVLDDIWAINAWNTFKVCFVENNLGSRVITTTRNEDVAKACCSCFHGHVYRIKPLNDLDSRRLFYKRVFYSDEACPKQLKNVSGEILKKCDGVPLAILSVASYLASHEEVSSKETWEKMQNHLG	no	17,16,14,1,6,4,5,10,3,12,2,8,7	NA	1.7e-41	NA	NA	NA	NA	NA	NA	NA	NA	NA	NA	NA	NA
Hordeum vulgare	HORVU3Hr1G010310.7	CNL	partial	HORVU3Hr1G010310.7:3	HORVU3Hr1G010310.7:508	EDGANRLRVAAVVGSGGMGKTTLAHQVYTKIKSQFDCKAFVTVSQNASTFKTLSDIYQAFRGWMPSSLKDGQLIVELRNYLRDKRYLIVLDDIWAINAWNTFKVCFVENNLGSRVITTTRNEDVAKACCSCFHGHVYRIKPLNDLDSRRLFYKRVFYSDEACPKQLKNVSGEILKKCDGVPLAILSVASYLASHEEVSSKETWEKMQNHLG	no	17,16,14,1,6,4,5,10,3,12,2,8,7	NA	1.7e-41	NA	NA	NA	NA	NA	NA	NA	NA	NA	NA	NA	NA
Hordeum vulgare	HORVU3Hr1G010310.8	CNL	partial	HORVU3Hr1G010310.8:3	HORVU3Hr1G010310.8:454	EDGANRLRVAAVVGSGGMGKTTLAHQVYTKIKSQFDCKAFVTVSQNASTFKTLSDIYQAFRGWMPSSLKDGQLIVELRNYLRDKRYLIVLDDIWAINAWNTFKVCFVENNLGSRVITTTRNEDVAKACCSCFHGHVYRIKPLNDLDSRRLFYKRVFYSDEACPKQLKNVSGEILKKCDGVPLAILSVASYLAIFPQGSKIRKENLVKRWIS	no	17,16,14,1,6,4,5,10,2,8,7	NA	2.4e-39	NA	NA	NA	NA	NA	NA	NA	NA	NA	NA	NA	NA
Hordeum vulgare	HORVU3Hr1G010980.1	CNL	partial	HORVU3Hr1G010980.1:177	HORVU3Hr1G010980.1:609	NEKVDRLKVVSLVGLEGTGKTTLARSLYHQVQRSGQFECGAFVRVSPNPDMRRLLTTIFTQIQLPYSVCEGVSQPACCLDAQSLIANIKHYLQHKRYFIILDDLWSISVWDIIRRAFPDVGCHSTIITTTQIQDVASACCSYQSKYIIKMEPLEDYQSRKLFFSVVFGSEDAVSFPGDFEEVQSEIIEKCGGLPLSIVNIASMLPEPSKRN	no	1,6,4,5,3,12,2,8,7,9	yes	2e-33	NA	NA	NA	NA	NA	NA	NA	NA	NA	NA	NA	NA
Hordeum vulgare	HORVU3Hr1G010980.10	CNL	partial	HORVU3Hr1G010980.10:177	HORVU3Hr1G010980.10:609	NEKVDRLKVVSLVGLEGTGKTTLARSLYHQVQRSGQFECGAFVRVSPNPDMRRLLTTIFTQIQLPYSVCEGVSQPACCLDAQSLIANIKHYLQHKRYFIILDDLWSISVWDIIRRAFPDVGCHSTIITTTQIQDVASACCSYQSKYIIKMEPLEDYQSRKLFFSVVFGSEDAVSFPGDFEEVQSEIIEKCGGLPLSIVNIASMLPEPSKRN	no	1,6,4,5,3,12,2,8,7,9	yes	2e-33	NA	NA	NA	NA	NA	NA	NA	NA	NA	NA	NA	NA
Hordeum vulgare	HORVU3Hr1G010980.11	CNL	partial	HORVU3Hr1G010980.11:177	HORVU3Hr1G010980.11:609	NEKVDRLKVVSLVGLEGTGKTTLARSLYHQVQRSGQFECGAFVRVSPNPDMRRLLTTIFTQIQLPYSVCEGVSQPACCLDAQSLIANIKHYLQHKRYFIILDDLWSISVWDIIRRAFPDVGCHSTIITTTQIQDVASACCSYQSKYIIKMEPLEDYQSRKLFFSVVFGSEDAVSFPGDFEEVQSEIIEKCGGLPLSIVNIASMLPEPSKRN	no	1,6,4,5,3,12,2,8,7,9	yes	1.9e-33	NA	NA	NA	NA	NA	NA	NA	NA	NA	NA	NA	NA
Hordeum vulgare	HORVU3Hr1G010980.12	CNL	partial	HORVU3Hr1G010980.12:177	HORVU3Hr1G010980.12:609	NEKVDRLKVVSLVGLEGTGKTTLARSLYHQVQRSGQFECGAFVRVSPNPDMRRLLTTIFTQIQLPYSVCEGVSQPACCLDAQSLIANIKHYLQHKRYFIILDDLWSISVWDIIRRAFPDVGCHSTIITTTQIQDVASACCSYQSKYIIKMEPLEDYQSRKLFFSVVFGSEDAVSFPGDFEEVQSEIIEKCGGLPLSIVNIASMLPEPSKRN	no	1,6,4,5,3,12,2,8,7,9	yes	1.9e-33	NA	NA	NA	NA	NA	NA	NA	NA	NA	NA	NA	NA
Hordeum vulgare	HORVU3Hr1G010980.13	CNL	partial	HORVU3Hr1G010980.13:177	HORVU3Hr1G010980.13:609	NEKVDRLKVVSLVGLEGTGKTTLARSLYHQVQRSGQFECGAFVRVSPNPDMRRLLTTIFTQIQLPYSVCEGVSQPACCLDAQSLIANIKHYLQHKRYFIILDDLWSISVWDIIRRAFPDVGCHSTIITTTQIQDVASACCSYQSKYIIKMEPLEDYQSRKLFFSVVFGSEDAVSFPGDFEEVQSEIIEKCGGLPLSIVNIASMLPEPSKRN	no	1,6,4,5,3,12,2,8,7,9	yes	1.7e-33	NA	NA	NA	NA	NA	NA	NA	NA	NA	NA	NA	NA
Hordeum vulgare	HORVU3Hr1G010980.14	CNL	partial	HORVU3Hr1G010980.14:18	HORVU3Hr1G010980.14:364	NA	no	4,5,3,12,2,8,7,9	yes	1.1e-17	NA	NA	NA	NA	NA	NA	NA	NA	NA	NA	NA	NA
Hordeum vulgare	HORVU3Hr1G010980.2	CNL	partial	HORVU3Hr1G010980.2:177	HORVU3Hr1G010980.2:609	NEKVDRLKVVSLVGLEGTGKTTLARSLYHQVQRSGQFECGAFVRVSPNPDMRRLLTTIFTQIQLPYSVCEGVSQPACCLDAQSLIANIKHYLQHKRYFIILDDLWSISVWDIIRRAFPDVGCHSTIITTTQIQDVASACCSYQSKYIIKMEPLEDYQSRKLFFSVVFGSEDAVSFPGDFEEVQSEIIEKCGGLPLSIVNIASMLPEPSKRN	no	1,6,4,5,3,12,2,8,7,9	yes	1.9e-33	NA	NA	NA	NA	NA	NA	NA	NA	NA	NA	NA	NA
Hordeum vulgare	HORVU3Hr1G010980.3	CNL	partial	HORVU3Hr1G010980.3:177	HORVU3Hr1G010980.3:609	NEKVDRLKVVSLVGLEGTGKTTLARSLYHQVQRSGQFECGAFVRVSPNPDMRRLLTTIFTQIQLPYSVCEGVSQPACCLDAQSLIANIKHYLQHKRYFIILDDLWSISVWDIIRRAFPDVGCHSTIITTTQIQDVASACCSYQSKYIIKMEPLEDYQSRKLFFSVVFGSEDAVSFPGDFEEVQSEIIEKCGGLPLSIVNIASMLPEPSKRN	no	1,6,4,5,3,12,2,8,7,9	yes	1.7e-33	NA	NA	NA	NA	NA	NA	NA	NA	NA	NA	NA	NA
Hordeum vulgare	HORVU3Hr1G010980.4	CNL	partial	HORVU3Hr1G010980.4:177	HORVU3Hr1G010980.4:609	NEKVDRLKVVSLVGLEGTGKTTLARSLYHQVQRSGQFECGAFVRVSPNPDMRRLLTTIFTQIQLPYSVCEGVSQPACCLDAQSLIANIKHYLQHKRYFIILDDLWSISVWDIIRRAFPDVGCHSTIITTTQIQDVASACCSYQSKYIIKMEPLEDYQSRKLFFSVVFGSEDAVSFPGDFEEVQSEIIEKCGGLPLSIVNIASMLPEPSKRN	no	1,6,4,5,3,12,2,8,7,9	yes	1.7e-33	NA	NA	NA	NA	NA	NA	NA	NA	NA	NA	NA	NA
[truncated: 7,728 more rows]
